# Supplementary material for: Temporal transcriptomic dynamics in developing macaque neocortex
Source: eLife. 2024 Feb 28;12:RP90325. doi: 10.7554/eLife.90325 (PMC10911584; doi:10.7554/eLife.90325)
Supplement: Supplementary file 1. [file elife-90325-supp1.csv]

p_val	avg_log2FC	pct.1	pct.2	p_val_adj	cluster	gene
0	2.102027767	0.595	0.158	0	0	PALMD
0	1.752300632	0.783	0.253	0	0	NEUROD2
0	1.718625068	0.459	0.102	0	0	PROKR2
0	1.659353968	0.656	0.214	0	0	SLA
0	1.617517771	0.452	0.116	0	0	THBS1
0	1.54530412	0.906	0.48	0	0	ZBTB18
0	1.524045521	0.721	0.288	0	0	NEUROD6
0	1.520076495	0.828	0.447	0	0	ENC1
0	1.394991567	0.694	0.36	0	0	MLLT3
0	1.366727276	0.488	0.177	0	0	PRDM8
0	1.346581452	0.635	0.238	0	0	TBR1
0	1.292360303	0.616	0.316	0	0	EZR
0	1.28519453	0.564	0.268	0	0	PPP2R2B
0	1.275943632	0.299	0.072	0	0	NRP1
0	1.254640074	0.546	0.237	0	0	EPHA3
0	1.212441156	0.492	0.192	0	0	ISLR2
0	1.140789678	0.51	0.237	0	0	CHRDL1
0	1.125243624	0.532	0.235	0	0	ADCYAP1R1
0	1.124616811	0.545	0.283	0	0	LRP8
0	1.075325483	0.346	0.129	0	0	CLMP
0	1.054926463	0.457	0.212	0	0	LINGO1
0	1.048303273	0.401	0.175	0	0	NRN1
0	1.035963734	0.554	0.29	0	0	SEZ6
0	1.017370202	0.32	0.133	0	0	POU3F2
0	1.014819184	0.358	0.172	0	0	FAM13A
0	1.006884607	0.564	0.327	0	0	GNAI1
0	0.997636293	0.504	0.255	0	0	MEIS2
0	0.988471224	0.809	0.603	0	0	DDAH2
0	0.986032677	0.751	0.481	0	0	CPE
0	0.97469802	0.258	0.091	0	0	SLC17A6
0	0.943154976	0.351	0.16	0	0	SMARCD3
0	0.934602245	0.354	0.165	0	0	RBFOX3
0	0.917058849	0.395	0.172	0	0	NXPH4
0	0.916809584	0.984	0.879	0	0	GPM6A
0	0.911134433	0.237	0.07	0	0	NPTX1
0	0.907758346	0.347	0.17	0	0	FRMD4B
0	0.871297789	0.185	0.054	0	0	HS3ST1
0	0.861059941	0.292	0.115	0	0	SLC17A7
0	0.859089373	0.213	0.064	0	0	PRSS12
0	0.844451576	0.937	0.781	0	0	APP
0	0.842281732	0.795	0.528	0	0	GRIA2
0	0.791087698	0.701	0.454	0	0	NFIB
0	0.778975972	0.622	0.344	0	0	LHX2
0	0.775536201	0.748	0.586	0	0	ITM2B
0	0.774993094	0.748	0.589	0	0	TSC22D1
0	0.759685467	0.451	0.233	0	0	HTRA1
0	0.741942853	0.969	0.772	0	0	NSG2
2.11E-296	0.985645792	0.381	0.21	5.13E-292	0	DOK6
7.30E-294	0.69957983	0.708	0.586	1.78E-289	0	ARHGAP21
3.25E-293	0.324572811	0.982	0.952	7.92E-289	0	ENSMMUG00000012140
3.15E-292	0.297711946	0.522	0.291	7.67E-288	0	SYT4
1.08E-286	0.824758887	0.419	0.241	2.63E-282	0	GRIA3
2.09E-283	0.980288954	0.296	0.142	5.08E-279	0	NEUROD1
8.48E-276	0.725007384	0.399	0.225	2.06E-271	0	NFIX
2.45E-263	0.671407669	0.62	0.434	5.97E-259	0	SYT5
2.29E-261	0.600346929	0.706	0.571	5.57E-257	0	FYN
7.41E-260	0.637045932	0.234	0.1	1.80E-255	0	TTC28
4.54E-258	0.663254068	0.606	0.428	1.10E-253	0	VCAN
5.36E-256	0.808279555	0.417	0.257	1.30E-251	0	CAP2
6.37E-256	0.732873582	0.308	0.155	1.55E-251	0	NDRG1
7.48E-256	0.814461616	0.269	0.125	1.82E-251	0	PAG1
7.55E-256	0.664214717	0.527	0.354	1.84E-251	0	CSRP2
3.29E-255	0.675712894	0.68	0.542	8.00E-251	0	FAM107B
1.90E-254	0.56493264	0.11	0.027	4.63E-250	0	SEMA3C
2.05E-242	0.652168216	0.416	0.238	4.99E-238	0	MPPED1
1.57E-239	0.724983424	0.199	0.08	3.81E-235	0	EPHB6
5.46E-231	0.362985496	0.915	0.866	1.33E-226	0	YWHAZ
3.81E-230	0.785042737	0.395	0.244	9.26E-226	0	RNF182
5.38E-230	0.785605487	0.377	0.222	1.31E-225	0	CDC42EP3
3.24E-226	0.904386456	0.238	0.11	7.87E-222	0	ZNF804A
2.78E-220	0.505135361	0.743	0.616	6.76E-216	0	SEPTIN3
1.30E-219	0.405097349	0.868	0.742	3.15E-215	0	CDK5R1
8.31E-215	0.282114853	0.965	0.841	2.02E-210	0	STMN2
3.14E-210	0.479850137	0.742	0.597	7.63E-206	0	STXBP1
3.18E-209	0.49988823	0.142	0.049	7.75E-205	0	TTYH2
2.73E-207	0.287108926	0.975	0.942	6.63E-203	0	TUBB
2.62E-206	0.487330376	0.138	0.048	6.38E-202	0	TENM4
4.81E-198	0.379247314	0.885	0.816	1.17E-193	0	CEP170
1.43E-197	0.59902879	0.51	0.36	3.49E-193	0	FOXG1
1.02E-192	0.561441603	0.496	0.343	2.49E-188	0	TAGLN3
8.87E-191	0.696670634	0.232	0.116	2.16E-186	0	JAKMIP1
1.46E-186	0.489806157	0.14	0.052	3.56E-182	0	UNC5A
1.33E-182	0.781274231	0.296	0.17	3.23E-178	0	CDH11
3.78E-180	0.7202864	0.136	0.051	9.21E-176	0	ENSMMUG00000054125
3.91E-180	0.645697002	0.27	0.149	9.51E-176	0	SPIRE1
2.10E-179	0.520516664	0.61	0.47	5.10E-175	0	BCL11A
8.41E-179	0.659740431	0.398	0.258	2.05E-174	0	NUAK1
8.73E-177	0.60594289	0.167	0.072	2.12E-172	0	SEMA4D
1.13E-173	0.680139495	0.295	0.169	2.74E-169	0	GPR85
2.79E-167	0.571351762	0.563	0.423	6.79E-163	0	SMPD3
1.10E-165	0.303618917	0.918	0.833	2.68E-161	0	TUBB3
1.23E-164	0.637713301	0.198	0.095	2.99E-160	0	THSD7A
6.76E-161	0.363594144	0.772	0.65	1.64E-156	0	UCHL1
2.96E-156	0.29404376	0.905	0.835	7.19E-152	0	MLLT11
8.09E-153	0.700800824	0.387	0.26	1.97E-148	0	CTTNBP2
1.75E-152	0.356634158	0.279	0.155	4.26E-148	0	CNR1
1.28E-151	0.556069734	0.422	0.296	3.12E-147	0	BASP1
1.48E-151	0.701639009	0.348	0.226	3.59E-147	0	CEP85L
2.42E-144	0.531302383	0.529	0.413	5.88E-140	0	ENSMMUG00000061128
9.75E-143	0.420073813	0.599	0.476	2.37E-138	0	CORO2B
1.77E-139	0.73389723	0.232	0.132	4.31E-135	0	SDCCAG8
5.73E-137	0.483777299	0.418	0.287	1.39E-132	0	ENSMMUG00000059607
1.45E-133	0.539704872	0.538	0.43	3.53E-129	0	SHOC2
4.23E-131	0.340865344	0.794	0.725	1.03E-126	0	TMSB10
3.47E-124	0.451248505	0.562	0.452	8.43E-120	0	CHD3
1.06E-121	0.371787558	0.104	0.041	2.59E-117	0	L3MBTL4
2.24E-115	0.504833137	0.331	0.223	5.45E-111	0	PRKX
1.20E-114	0.563795837	0.366	0.258	2.92E-110	0	GNG3
1.64E-114	0.535788216	0.488	0.395	3.99E-110	0	TMEM59
5.42E-110	0.518830351	0.162	0.084	1.32E-105	0	KCNK2
5.50E-110	0.49012726	0.345	0.239	1.34E-105	0	B3GAT1
9.00E-110	0.48123892	0.192	0.107	2.19E-105	0	PTPN4
1.09E-107	0.366955482	0.199	0.111	2.66E-103	0	LRRC7
1.58E-107	0.451368376	0.193	0.108	3.84E-103	0	TMEM130
3.83E-107	0.44883217	0.364	0.254	9.32E-103	0	PLXNA2
6.83E-105	0.565279059	0.362	0.265	1.66E-100	0	HPCAL1
3.34E-104	0.578367016	0.361	0.264	8.14E-100	0	RAI14
4.97E-104	0.387485773	0.283	0.182	1.21E-99	0	SOX11
1.32E-103	0.542609228	0.408	0.308	3.20E-99	0	MFAP2
8.33E-102	0.289860807	0.751	0.623	2.03E-97	0	TUBB4A
2.46E-101	0.45308413	0.283	0.184	5.99E-97	0	SULT4A1
5.48E-101	0.592855652	0.238	0.151	1.33E-96	0	FAM126A
5.66E-100	0.434783637	0.262	0.164	1.38E-95	0	ENSMMUG00000062648
1.28E-98	0.32627174	0.781	0.738	3.12E-94	0	RPS26
1.61E-98	0.26660897	0.825	0.78	3.91E-94	0	DBN1
2.33E-97	0.54276784	0.261	0.17	5.66E-93	0	LDLRAD4
3.83E-97	0.475557409	0.114	0.052	9.31E-93	0	TMEM74
1.05E-95	0.38094318	0.172	0.095	2.55E-91	0	SHB
3.59E-95	0.408731025	0.176	0.1	8.74E-91	0	EMX1
2.09E-94	0.465111319	0.268	0.176	5.09E-90	0	OCIAD2
6.05E-94	0.329332748	0.121	0.058	1.47E-89	0	SATB2
4.56E-93	0.366258928	0.115	0.054	1.11E-88	0	CDH4
2.67E-91	0.363615202	0.145	0.076	6.49E-87	0	MCUR1
1.77E-88	0.363559498	0.414	0.305	4.30E-84	0	ID2
5.34E-88	0.443369551	0.558	0.445	1.30E-83	0	NFIA
8.25E-88	0.394342971	0.392	0.294	2.01E-83	0	RCOR2
1.75E-87	0.432697493	0.157	0.085	4.26E-83	0	LMO1
3.80E-87	0.256166232	0.739	0.635	9.24E-83	0	NSG1
7.17E-84	0.573108663	0.236	0.155	1.75E-79	0	NEDD9
9.28E-84	0.548389798	0.183	0.111	2.26E-79	0	RRAS2
1.58E-81	0.314406899	0.533	0.407	3.84E-77	0	L1CAM
4.02E-81	0.285718956	0.691	0.584	9.77E-77	0	CELF3
2.84E-80	0.486558812	0.318	0.232	6.90E-76	0	SRGAP1
6.42E-80	0.450737197	0.245	0.163	1.56E-75	0	PGAP1
5.24E-77	0.379971992	0.245	0.159	1.28E-72	0	PCDH8
9.63E-77	0.302390466	0.668	0.616	2.34E-72	0	MIDN
7.21E-76	0.321044137	0.641	0.578	1.75E-71	0	CLIP3
6.82E-75	0.561035474	0.214	0.142	1.66E-70	0	C1GALT1
7.72E-75	0.539632154	0.238	0.161	1.88E-70	0	TMEM150C
8.67E-75	0.474462676	0.446	0.361	2.11E-70	0	CPEB4
1.26E-74	0.407950301	0.134	0.074	3.05E-70	0	SH3BGRL2
2.77E-74	0.415993396	0.374	0.282	6.74E-70	0	ENSMMUG00000058820
4.54E-73	0.435353328	0.421	0.339	1.10E-68	0	PRKACB
8.04E-72	0.294746138	0.723	0.671	1.96E-67	0	RPL4
1.52E-71	0.41977701	0.298	0.217	3.70E-67	0	BRSK2
6.71E-71	0.365413905	0.518	0.435	1.63E-66	0	DPYSL5
3.47E-70	0.42846531	0.108	0.056	8.45E-66	0	DUSP14
1.92E-69	0.443762647	0.437	0.361	4.66E-65	0	CDKN1B
7.58E-69	0.346844925	0.554	0.474	1.84E-64	0	MSANTD3.TMEFF1
3.90E-68	0.371311102	0.202	0.132	9.49E-64	0	ZNF462
6.20E-68	0.335342536	0.56	0.479	1.51E-63	0	ZC2HC1A
7.05E-68	0.320384336	0.548	0.47	1.71E-63	0	APC2
8.83E-68	0.36327073	0.588	0.527	2.15E-63	0	RHOB
1.17E-67	0.327891298	0.629	0.579	2.85E-63	0	RPS4X
1.57E-67	0.276602731	0.1	0.05	3.82E-63	0	RASL11B
1.01E-66	0.277098187	0.165	0.098	2.45E-62	0	GADD45G
1.02E-66	0.412808953	0.455	0.386	2.49E-62	0	NCKAP1
1.92E-66	0.283227552	0.655	0.574	4.67E-62	0	CD200
2.19E-65	0.330756443	0.451	0.356	5.33E-61	0	JPH4
3.79E-64	0.320499783	0.526	0.447	9.22E-60	0	ENSMMUG00000056792
1.06E-63	0.467186468	0.28	0.208	2.57E-59	0	EML1
1.14E-63	0.29688912	0.199	0.13	2.78E-59	0	SNCA
2.03E-62	0.250798047	0.741	0.675	4.94E-58	0	CTXN1
6.95E-62	0.404894234	0.191	0.125	1.69E-57	0	ENSMMUG00000061242
1.44E-61	0.292253505	0.118	0.065	3.49E-57	0	AZU1
9.92E-61	0.468917366	0.315	0.242	2.41E-56	0	GPAM
9.38E-60	0.345090069	0.218	0.149	2.28E-55	0	TMEM132A
1.30E-59	0.473466318	0.158	0.1	3.17E-55	0	ZBTB38
4.50E-59	0.296862451	0.124	0.071	1.09E-54	0	CAMKV
6.04E-59	0.501684629	0.328	0.255	1.47E-54	0	SERPINE2
6.85E-59	0.294709874	0.569	0.497	1.67E-54	0	RAB3D
1.21E-58	0.464239411	0.228	0.162	2.93E-54	0	USP46
7.00E-58	0.493381623	0.253	0.184	1.70E-53	0	TXNIP
1.01E-57	0.4718672	0.235	0.169	2.45E-53	0	TMEM108
1.32E-57	0.344860956	0.42	0.348	3.20E-53	0	VTA1
1.86E-57	0.371130175	0.223	0.155	4.54E-53	0	JUP
1.97E-57	0.391635514	0.142	0.087	4.79E-53	0	DUSP16
3.76E-57	0.503734237	0.397	0.337	9.16E-53	0	BSCL2
5.00E-57	0.268166527	0.103	0.056	1.22E-52	0	PTPRE
5.43E-57	0.489568604	0.156	0.099	1.32E-52	0	PHLDA1
5.95E-57	0.422974678	0.231	0.166	1.45E-52	0	TNKS1BP1
5.42E-56	0.400018491	0.189	0.127	1.32E-51	0	SHC3
5.49E-56	0.449984839	0.285	0.218	1.34E-51	0	IGSF8
8.44E-56	0.407350017	0.183	0.121	2.05E-51	0	MB21D2
9.71E-56	0.281405092	0.575	0.511	2.36E-51	0	SLC38A1
1.84E-55	0.315027564	0.592	0.541	4.47E-51	0	ZNF292
8.74E-55	0.340383891	0.174	0.113	2.13E-50	0	RNF112
1.06E-54	0.58692364	0.132	0.082	2.59E-50	0	SNX7
1.64E-54	0.257409707	0.56	0.489	3.99E-50	0	TRIB2
5.84E-54	0.379775892	0.15	0.095	1.42E-49	0	ZNF703
6.24E-54	0.312863203	0.325	0.252	1.52E-49	0	FOXO3
6.55E-53	0.357229985	0.236	0.169	1.59E-48	0	CBLB
9.30E-53	0.329907109	0.482	0.416	2.26E-48	0	ZNF300
4.63E-52	0.333494884	0.254	0.185	1.13E-47	0	ROBO2
5.00E-52	0.27167774	0.645	0.584	1.22E-47	0	DYNLL1
1.74E-51	0.402456611	0.283	0.214	4.24E-47	0	ATP2B4
1.85E-51	0.422665745	0.304	0.237	4.51E-47	0	G2E3
7.14E-50	0.340996599	0.482	0.423	1.74E-45	0	RPL18
1.46E-49	0.479557915	0.262	0.2	3.55E-45	0	PLEKHA1
1.76E-49	0.314945432	0.378	0.304	4.27E-45	0	SEZ6L2
1.76E-48	0.330275563	0.415	0.348	4.29E-44	0	AKT3
2.07E-48	0.460462961	0.25	0.189	5.03E-44	0	ABHD16A
2.46E-48	0.275626775	0.61	0.562	5.99E-44	0	SRSF7
9.26E-48	0.330635581	0.112	0.067	2.25E-43	0	CNKSR2
1.73E-47	0.363880497	0.276	0.213	4.21E-43	0	NUDT4
3.74E-47	0.266229348	0.551	0.495	9.10E-43	0	YPEL3
3.95E-47	0.268175672	0.492	0.426	9.62E-43	0	KDM6B
4.12E-47	0.54048807	0.146	0.097	1.00E-42	0	MAGI3
1.13E-46	0.375850242	0.4	0.347	2.75E-42	0	RPL26
1.24E-46	0.278165103	0.562	0.505	3.01E-42	0	KDM5B
1.58E-46	0.320843087	0.234	0.172	3.83E-42	0	SEMA6C
2.55E-46	0.342292013	0.17	0.116	6.20E-42	0	ASNS
2.59E-46	0.294301383	0.575	0.527	6.30E-42	0	SREBF2
2.74E-46	0.318222284	0.152	0.101	6.68E-42	0	WWC1
4.23E-46	0.326181512	0.555	0.519	1.03E-41	0	YWHAH
5.50E-46	0.284578638	0.421	0.356	1.34E-41	0	PPP1R18
6.93E-46	0.347574464	0.226	0.167	1.69E-41	0	NAB2
1.11E-45	0.416545793	0.348	0.29	2.71E-41	0	AHDC1
1.69E-45	0.397389886	0.326	0.265	4.10E-41	0	MYCN
3.48E-45	0.365492645	0.188	0.133	8.46E-41	0	SYNGR1
4.05E-45	0.370345221	0.442	0.384	9.85E-41	0	TSPAN5
1.99E-44	0.495547935	0.176	0.123	4.84E-40	0	INHBB
3.43E-44	0.347592739	0.195	0.139	8.35E-40	0	SEMA3A
4.65E-44	0.418103831	0.396	0.343	1.13E-39	0	SMS
4.65E-44	0.283398293	0.104	0.061	1.13E-39	0	SORL1
6.06E-44	0.253803919	0.512	0.452	1.47E-39	0	MXI1
6.82E-44	0.278550367	0.193	0.136	1.66E-39	0	SLC8A2
7.44E-44	0.45896231	0.179	0.126	1.81E-39	0	ENSMMUG00000059535
4.49E-43	0.385862663	0.191	0.138	1.09E-38	0	MAP6
9.52E-43	0.352289397	0.16	0.11	2.32E-38	0	PRRT1
1.58E-42	0.307190506	0.354	0.289	3.84E-38	0	PHACTR3
2.08E-42	0.437234784	0.305	0.247	5.06E-38	0	PLEKHA5
2.90E-42	0.31643414	0.295	0.235	7.07E-38	0	ENSMMUG00000047370
6.38E-42	0.309086714	0.394	0.327	1.55E-37	0	TMEM59L
2.33E-41	0.432425173	0.194	0.141	5.67E-37	0	RETREG1
1.45E-40	0.352592255	0.437	0.389	3.52E-36	0	NDUFB4
1.82E-40	0.322715061	0.419	0.366	4.42E-36	0	ENSMMUG00000059641
2.60E-40	0.325476979	0.48	0.437	6.33E-36	0	ACAD10
2.77E-39	0.501182664	0.224	0.172	6.73E-35	0	ENSMMUG00000055810
2.99E-39	0.306729211	0.13	0.086	7.26E-35	0	PLPPR1
3.31E-39	0.433986577	0.182	0.132	8.05E-35	0	LCA5
5.90E-39	0.324753855	0.431	0.383	1.44E-34	0	RPL19
7.03E-39	0.276474645	0.539	0.484	1.71E-34	0	CCNG2
8.90E-39	0.406607529	0.32	0.269	2.16E-34	0	FMNL2
1.03E-38	0.254551589	0.352	0.284	2.51E-34	0	PAK5
1.20E-38	0.287356947	0.144	0.096	2.92E-34	0	PPP1R1B
1.34E-38	0.348283773	0.378	0.322	3.27E-34	0	FAM3C
1.58E-38	0.268130686	0.41	0.348	3.84E-34	0	WDR47
1.70E-38	0.360680066	0.172	0.123	4.14E-34	0	ADGRB2
6.94E-38	0.27321184	0.126	0.082	1.69E-33	0	CDKL5
9.34E-38	0.281037593	0.345	0.289	2.27E-33	0	FAM89B
1.15E-37	0.344423261	0.274	0.219	2.80E-33	0	PDE9A
1.24E-37	0.312762735	0.315	0.255	3.03E-33	0	EEF1A2
2.04E-37	0.38005469	0.117	0.075	4.95E-33	0	RASGEF1B
2.45E-37	0.293334458	0.119	0.077	5.96E-33	0	DSEL
4.33E-37	0.340485342	0.346	0.294	1.05E-32	0	PFKM
7.92E-36	0.380474542	0.254	0.2	1.93E-31	0	NFIC
8.73E-36	0.379161444	0.344	0.29	2.12E-31	0	INSIG1
9.34E-36	0.307329419	0.436	0.384	2.27E-31	0	PREPL
2.54E-35	0.326759291	0.154	0.108	6.17E-31	0	ENSMMUG00000055376
3.42E-35	0.30720766	0.451	0.395	8.31E-31	0	SCRN1
3.91E-35	0.344334615	0.214	0.163	9.51E-31	0	CBFA2T2
5.06E-35	0.373460025	0.273	0.222	1.23E-30	0	TMEM94
1.40E-34	0.31892396	0.303	0.25	3.39E-30	0	SETBP1
1.87E-34	0.319332783	0.27	0.214	4.55E-30	0	PCLO
2.43E-34	0.454612331	0.229	0.18	5.91E-30	0	ZFHX4
3.12E-34	0.355838	0.279	0.225	7.58E-30	0	PPFIA2
3.35E-34	0.290759072	0.328	0.27	8.15E-30	0	TNIK
6.10E-34	0.383665453	0.184	0.138	1.49E-29	0	GPHN
6.29E-34	0.358317386	0.17	0.125	1.53E-29	0	EPHB1
7.27E-34	0.394690861	0.341	0.292	1.77E-29	0	HMGN3
1.05E-33	0.31420122	0.465	0.42	2.55E-29	0	SLC22A17
3.17E-33	0.324001597	0.144	0.101	7.73E-29	0	ENSMMUG00000058427
1.01E-32	0.419216201	0.171	0.127	2.47E-28	0	ENSMMUG00000050591
1.05E-32	0.262578376	0.553	0.521	2.54E-28	0	RPL24
1.46E-32	0.327484822	0.455	0.415	3.54E-28	0	FDFT1
2.36E-32	0.37726995	0.258	0.212	5.75E-28	0	DNAJB5
2.89E-32	0.270758937	0.243	0.192	7.03E-28	0	RTN2
4.28E-32	0.270344366	0.168	0.123	1.04E-27	0	SESN1
4.61E-32	0.306973078	0.344	0.295	1.12E-27	0	ENSMMUG00000064232
2.66E-31	0.280881058	0.354	0.305	6.46E-27	0	APBA2
2.67E-31	0.336708549	0.342	0.296	6.49E-27	0	NCOA1
3.47E-31	0.397937809	0.209	0.165	8.43E-27	0	ENSMMUG00000003646
5.93E-31	0.413986811	0.148	0.108	1.44E-26	0	PTPRK
1.79E-30	0.26551929	0.205	0.155	4.36E-26	0	ELMOD1
3.04E-30	0.307223957	0.339	0.294	7.39E-26	0	ENSMMUG00000044916
1.33E-29	0.320782647	0.325	0.277	3.23E-25	0	EFNB3
9.76E-29	0.431700102	0.287	0.247	2.38E-24	0	TMEM106B
2.93E-28	0.324886713	0.297	0.253	7.12E-24	0	TCEAL5
5.29E-28	0.288559695	0.374	0.331	1.29E-23	0	JAK1
6.99E-28	0.292152605	0.346	0.304	1.70E-23	0	BCL7A
9.79E-28	0.428050217	0.205	0.164	2.38E-23	0	SETD7
1.25E-27	0.274000925	0.253	0.207	3.04E-23	0	KDM4B
1.67E-27	0.287993171	0.321	0.275	4.05E-23	0	FAM171B
4.64E-27	0.324578564	0.245	0.202	1.13E-22	0	ENSMMUG00000008383
4.87E-27	0.326054213	0.223	0.18	1.18E-22	0	STX6
6.05E-27	0.310442186	0.153	0.113	1.47E-22	0	CHD5
7.23E-27	0.315377222	0.46	0.424	1.76E-22	0	EIF1B
8.78E-27	0.340472259	0.337	0.295	2.14E-22	0	JMJD1C
1.82E-26	0.257209965	0.298	0.25	4.42E-22	0	CXADR
4.08E-26	0.291676999	0.227	0.184	9.94E-22	0	KLF3
4.35E-26	0.298219616	0.292	0.248	1.06E-21	0	SEMA4C
4.64E-26	0.389885581	0.12	0.085	1.13E-21	0	ENSMMUG00000056736
6.30E-26	0.317401695	0.364	0.324	1.53E-21	0	ZNF33B
1.19E-25	0.331810989	0.397	0.364	2.89E-21	0	SPOP
1.36E-25	0.281681636	0.186	0.145	3.31E-21	0	MAPK11
9.94E-24	0.361874808	0.457	0.426	2.42E-19	0	EGR1
1.12E-23	0.322880427	0.224	0.186	2.73E-19	0	CHN1
1.51E-23	0.265544424	0.341	0.3	3.66E-19	0	SUN2
1.59E-23	0.301819635	0.375	0.34	3.87E-19	0	CTTNBP2NL
2.75E-23	0.306578382	0.314	0.277	6.69E-19	0	FAM8A1
3.87E-23	0.344614227	0.257	0.221	9.42E-19	0	TUB
9.39E-23	0.294532989	0.183	0.146	2.29E-18	0	CHST2
1.81E-22	0.277317478	0.381	0.347	4.39E-18	0	IDH1
5.16E-22	0.324502872	0.212	0.177	1.26E-17	0	NEIL2
2.05E-21	0.253992574	0.338	0.303	4.99E-17	0	CYTH2
7.36E-21	0.26891242	0.328	0.289	1.79E-16	0	LRRN1
1.17E-20	0.273011085	0.321	0.289	2.85E-16	0	ENSMMUG00000006397
1.44E-20	0.265308983	0.194	0.158	3.49E-16	0	CIPC
1.52E-20	0.256828857	0.352	0.317	3.71E-16	0	WDR3
1.67E-20	0.273232104	0.286	0.249	4.06E-16	0	SOS1
5.88E-20	0.250367354	0.251	0.214	1.43E-15	0	CACNB1
3.62E-19	0.259635943	0.298	0.264	8.80E-15	0	TBC1D25
1.14E-18	0.291066828	0.362	0.337	2.76E-14	0	ZNF706
1.91E-18	0.298262654	0.231	0.197	4.65E-14	0	IGSF9
2.03E-18	0.286846424	0.326	0.292	4.94E-14	0	GNG4
1.27E-17	0.309018995	0.256	0.224	3.10E-13	0	PGAP4
1.63E-17	0.319307703	0.19	0.156	3.97E-13	0	EMX2
3.87E-17	0.306628581	0.147	0.117	9.43E-13	0	RBFOX1
4.36E-17	0.25019082	0.432	0.41	1.06E-12	0	CTNND1
7.86E-17	0.257602929	0.267	0.235	1.91E-12	0	SRM
1.01E-16	0.314983	0.204	0.172	2.45E-12	0	IRS1
1.07E-16	0.287181057	0.215	0.185	2.60E-12	0	CHST10
7.13E-16	0.283599011	0.171	0.142	1.73E-11	0	BICD1
7.10E-15	0.369211713	0.144	0.118	1.73E-10	0	DIPK2A
2.48E-14	0.276015661	0.147	0.121	6.04E-10	0	LRRN2
3.82E-14	0.299950899	0.126	0.098	9.29E-10	0	GLRA2
4.71E-14	0.266752646	0.341	0.32	1.15E-09	0	HGSNAT
1.40E-13	0.254652661	0.151	0.126	3.40E-09	0	PRKAG2
2.91E-13	0.28274246	0.316	0.292	7.07E-09	0	LRRTM2
3.86E-13	0.265621097	0.321	0.3	9.38E-09	0	MED17
4.04E-13	0.278380884	0.27	0.246	9.84E-09	0	PHF1
4.25E-13	0.280493685	0.261	0.238	1.03E-08	0	TECR
5.38E-13	0.34410116	0.181	0.158	1.31E-08	0	SVIP
8.34E-13	0.261887299	0.131	0.107	2.03E-08	0	PLCE1
7.60E-12	0.295149178	0.243	0.22	1.85E-07	0	MTPAP
1.74E-10	0.256752379	0.245	0.223	4.22E-06	0	CALCOCO1
1.91E-10	0.250564674	0.148	0.125	4.64E-06	0	TRAM1L1
4.50E-10	0.304541693	0.166	0.145	1.09E-05	0	CC2D2A
1.24E-09	0.258731475	0.251	0.232	3.01E-05	0	C1H1orf21
2.54E-09	0.290717254	0.177	0.157	6.17E-05	0	SH3KBP1
9.86E-09	0.300961449	0.119	0.101	0.000239954	0	PPP1R14C
1.07E-08	0.281664861	0.186	0.168	0.000260966	0	DIXDC1
6.76E-06	0.370371735	0.136	0.123	0.164531792	0	NEGR1
0.002374581	0.261690316	0.23	0.265	1	0	FBXW7
0.003909074	0.281987115	0.202	0.199	1	0	CCDC186
0	2.425256585	0.925	0.293	0	1	PLS3
0	1.945426336	0.645	0.193	0	1	SP9
0	1.664522094	0.627	0.282	0	1	SLAIN1
0	1.576478093	0.503	0.17	0	1	CXCR4
0	1.516817816	0.615	0.22	0	1	DLX2
0	1.486964954	0.899	0.755	0	1	ENSMMUG00000049324
0	1.427085332	0.396	0.156	0	1	ZNF536
0	1.352221197	0.745	0.446	0	1	DCLK2
0	1.327465721	0.383	0.136	0	1	RIPOR2
0	1.292151638	0.509	0.219	0	1	GAD2
0	1.286098599	0.403	0.204	0	1	CEMIP2
0	1.267326382	0.517	0.218	0	1	DLX5
0	1.248242647	0.179	0.024	0	1	LGI1
0	1.212520657	0.264	0.104	0	1	NTN4
0	1.209850517	0.352	0.136	0	1	SLC32A1
0	1.184521959	0.163	0.033	0	1	EML6
0	1.121153599	0.546	0.346	0	1	CELF4
0	1.104859814	0.433	0.181	0	1	GAD1
0	1.046856321	0.416	0.217	0	1	SLC6A1
0	1.036253548	0.598	0.448	0	1	QKI
0	0.983097893	0.684	0.563	0	1	ZEB2
0	0.975587311	0.141	0.029	0	1	BMPER
0	0.969926419	0.925	0.415	0	1	ENSMMUG00000055860
0	0.896552338	0.899	0.741	0	1	INA
0	0.856966715	0.741	0.729	0	1	KIF2A
0	0.85023208	0.535	0.331	0	1	ENSMMUG00000052013
0	0.672027299	0.812	0.783	0	1	CCDC88A
0	0.641866053	0.919	0.782	0	1	NSG2
0	0.608845047	0.971	0.968	0	1	ENSMMUG00000061824
0	0.570086756	0.59	0.321	0	1	DLX1
0	0.428505372	0.996	0.982	0	1	STMN1
0	0.407159751	0.995	0.984	0	1	TUBB2B
1.11E-304	1.363533944	0.27	0.117	2.71E-300	1	LRRC8B
8.87E-273	1.035239398	0.171	0.054	2.16E-268	1	NXPH2
3.03E-257	0.432190128	0.922	0.939	7.38E-253	1	EIF4G2
5.87E-253	0.808167519	0.7	0.652	1.43E-248	1	SOX4
1.89E-241	0.996680435	0.515	0.382	4.60E-237	1	SCD5
2.26E-225	1.229844378	0.3	0.164	5.50E-221	1	ENSMMUG00000044046
1.52E-219	0.709602793	0.121	0.034	3.71E-215	1	ERBB4
3.46E-214	0.925367738	0.172	0.064	8.42E-210	1	DLX6
1.79E-208	1.078951454	0.314	0.176	4.36E-204	1	RBP1
2.84E-204	1.194900723	0.38	0.256	6.92E-200	1	RUNX1T1
1.05E-199	0.919514447	0.191	0.079	2.55E-195	1	FAM222A
1.05E-190	0.742862429	0.641	0.595	2.56E-186	1	TCF4
1.33E-180	1.083248651	0.394	0.28	3.23E-176	1	DCLK1
7.36E-178	0.955705254	0.586	0.558	1.79E-173	1	SMARCA5
1.27E-171	0.708926488	0.115	0.037	3.09E-167	1	ACKR3
3.29E-166	0.783660166	0.623	0.615	8.02E-162	1	KIAA0408
4.34E-166	0.907708558	0.535	0.47	1.06E-161	1	ZNF608
5.32E-166	1.084263003	0.28	0.163	1.29E-161	1	ENSMMUG00000031902
6.61E-165	0.281029746	0.984	0.986	1.61E-160	1	ACTB
2.07E-163	0.342723081	0.941	0.946	5.03E-159	1	MARCKSL1
2.33E-162	0.940413977	0.204	0.099	5.67E-158	1	RARA
2.35E-160	0.886955284	0.57	0.524	5.71E-156	1	DST
5.47E-156	0.379239182	0.926	0.932	1.33E-151	1	ENSMMUG00000065362
4.67E-152	0.940948895	0.367	0.254	1.14E-147	1	SATB1
5.08E-151	0.407160775	0.946	0.95	1.24E-146	1	HSP90AA1
9.00E-145	0.701203008	0.133	0.052	2.19E-140	1	ETS1
6.17E-143	0.328091135	0.929	0.9	1.50E-138	1	MAP1B
1.16E-142	0.986451294	0.466	0.397	2.81E-138	1	MYCBP2
3.81E-142	0.68478605	0.681	0.699	9.27E-138	1	AKAP9
2.27E-141	0.905703059	0.14	0.059	5.53E-137	1	PDZRN4
1.71E-136	0.703095919	0.632	0.584	4.16E-132	1	SHTN1
1.29E-134	0.888890384	0.471	0.391	3.13E-130	1	CHL1
2.45E-132	0.639008871	0.661	0.695	5.96E-128	1	SEPTIN7
1.96E-126	1.115364446	0.243	0.147	4.77E-122	1	DUSP4
2.98E-114	0.569389	0.696	0.748	7.26E-110	1	FSCN1
8.66E-113	0.440381535	0.746	0.745	2.11E-108	1	NCAM1
8.13E-112	0.254910211	0.985	0.976	1.98E-107	1	ENSMMUG00000060590
1.31E-108	0.859450782	0.122	0.054	3.18E-104	1	RBMS1
4.85E-104	0.266537184	0.942	0.956	1.18E-99	1	ENSMMUG00000010266
1.88E-103	0.486979132	0.707	0.716	4.58E-99	1	RBFOX2
1.51E-102	0.378073054	0.874	0.909	3.67E-98	1	CCNI
2.73E-99	0.387940434	0.785	0.789	6.64E-95	1	CRMP1
8.37E-99	0.354279311	0.843	0.845	2.04E-94	1	MLLT11
1.59E-97	0.921232083	0.215	0.134	3.87E-93	1	ZSWIM5
8.60E-96	0.439106072	0.606	0.589	2.09E-91	1	BTG1
1.72E-95	0.889702492	0.431	0.385	4.19E-91	1	SNAP25
5.63E-95	0.813814294	0.36	0.276	1.37E-90	1	ARL4D
6.55E-94	0.91772309	0.248	0.165	1.59E-89	1	DLGAP1
2.03E-91	1.044914649	0.288	0.215	4.95E-87	1	FNBP1
4.26E-82	0.69676295	0.465	0.427	1.04E-77	1	TCF12
1.71E-73	0.64268987	0.209	0.132	4.17E-69	1	SLC10A4
1.06E-71	1.053858814	0.23	0.163	2.58E-67	1	PCDH8
5.92E-63	0.782901523	0.231	0.164	1.44E-58	1	ST8SIA4
1.46E-62	0.412956551	0.703	0.778	3.56E-58	1	TMEM131L
1.62E-60	0.733611615	0.223	0.155	3.93E-56	1	WLS
2.13E-60	0.71232188	0.269	0.201	5.19E-56	1	ASCL1
9.48E-58	0.597469829	0.524	0.541	2.31E-53	1	KIF21B
7.93E-57	0.269112519	0.853	0.843	1.93E-52	1	TUBB3
9.36E-57	0.850294749	0.222	0.165	2.28E-52	1	CBFA2T3
1.11E-55	0.650951355	0.486	0.493	2.71E-51	1	CORO2B
4.51E-54	0.792794262	0.427	0.433	1.10E-49	1	TPGS2
9.95E-52	0.709803805	0.146	0.093	2.42E-47	1	TRERF1
1.06E-51	0.814020309	0.246	0.192	2.58E-47	1	NAV3
1.85E-50	0.33590926	0.742	0.761	4.51E-46	1	CDK5R1
1.72E-47	0.807514314	0.307	0.268	4.18E-43	1	MAPK10
2.00E-45	0.358395457	0.704	0.776	4.87E-41	1	ENSMMUG00000017466
1.85E-42	0.774461117	0.394	0.391	4.49E-38	1	ARRDC3
2.98E-42	0.508631439	0.56	0.61	7.26E-38	1	APC
3.06E-42	0.305699905	0.716	0.795	7.46E-38	1	DBN1
7.60E-42	0.763101285	0.331	0.301	1.85E-37	1	ENSMMUG00000059607
2.33E-39	0.414629063	0.187	0.306	5.67E-35	1	DNAJB1
1.13E-38	0.547792694	0.578	0.646	2.76E-34	1	H1.0
1.18E-38	0.692403547	0.157	0.111	2.87E-34	1	MGAT5B
1.81E-38	0.381576457	0.504	0.496	4.41E-34	1	RND3
1.84E-37	0.332963643	0.684	0.743	4.47E-33	1	ELAVL3
8.45E-37	0.731639556	0.247	0.204	2.06E-32	1	MYO1B
6.88E-36	0.823496663	0.282	0.253	1.68E-31	1	VGLL4
4.92E-35	0.353621636	0.665	0.77	1.20E-30	1	KHDRBS1
3.82E-34	0.566645712	0.521	0.593	9.30E-30	1	OGA
4.16E-34	0.420691793	0.147	0.1	1.01E-29	1	PDZRN3
6.45E-34	0.252983361	0.245	0.383	1.57E-29	1	THOC2
1.47E-33	0.278875712	0.743	0.842	3.57E-29	1	HNRNPH1
3.43E-31	0.731241168	0.248	0.216	8.34E-27	1	DAPK1
4.28E-31	0.488592042	0.582	0.657	1.04E-26	1	ANKRD12
1.59E-29	0.250596894	0.189	0.295	3.88E-25	1	WIPF2
6.93E-29	0.31531709	0.676	0.775	1.69E-24	1	TOP2B
8.18E-29	0.265218523	0.702	0.747	1.99E-24	1	GNG2
1.23E-28	0.734720627	0.314	0.303	2.99E-24	1	LANCL1
4.42E-28	0.767567826	0.327	0.32	1.08E-23	1	RASAL2
7.70E-28	0.255659276	0.24	0.368	1.87E-23	1	RNMT
8.40E-28	0.733450605	0.199	0.165	2.04E-23	1	GLCCI1
1.26E-27	0.552117401	0.115	0.079	3.06E-23	1	KCNA3
1.62E-27	0.666220471	0.18	0.142	3.94E-23	1	CDCA7
8.44E-27	0.253378394	0.233	0.355	2.05E-22	1	UBE2H
1.70E-26	0.264737592	0.16	0.249	4.14E-22	1	PCIF1
7.30E-26	0.478538964	0.108	0.074	1.78E-21	1	PCDH19
6.35E-25	0.253830126	0.183	0.28	1.55E-20	1	AIFM3
7.43E-25	0.464779622	0.117	0.08	1.81E-20	1	ENSMMUG00000058315
1.24E-24	0.278340236	0.159	0.244	3.01E-20	1	PIK3R3
1.44E-24	0.25757289	0.183	0.278	3.51E-20	1	CAPN1
8.16E-24	0.449623084	0.575	0.688	1.99E-19	1	RAB2A
2.59E-23	0.250748579	0.129	0.2	6.31E-19	1	VPS13C
5.29E-23	0.252271379	0.256	0.382	1.29E-18	1	DYNC1H1
5.93E-23	0.252797005	0.132	0.204	1.44E-18	1	SS18L1
6.13E-23	0.297596285	0.139	0.213	1.49E-18	1	STK4
1.42E-22	0.279183254	0.256	0.382	3.46E-18	1	MARCHF7
1.49E-22	0.251737854	0.148	0.225	3.63E-18	1	ZNF219
1.74E-22	0.682642439	0.159	0.126	4.24E-18	1	MOB3B
1.88E-22	0.538036413	0.328	0.305	4.59E-18	1	TMEM123
3.37E-22	0.264199027	0.15	0.227	8.19E-18	1	SCNM1
4.16E-22	0.324266971	0.658	0.752	1.01E-17	1	ENSMMUG00000052424
8.18E-22	0.285942361	0.133	0.203	1.99E-17	1	ABHD17B
1.43E-21	0.251534343	0.145	0.219	3.48E-17	1	ZNF708
2.95E-21	0.294408909	0.171	0.258	7.18E-17	1	CDC42SE2
3.46E-21	0.299391743	0.262	0.389	8.42E-17	1	PTPN11
4.34E-21	0.282027742	0.272	0.403	1.06E-16	1	ND1
8.33E-21	0.282138235	0.191	0.282	2.03E-16	1	ITFG2
1.36E-20	0.315416638	0.192	0.286	3.30E-16	1	PPP4R1
1.38E-20	0.737371253	0.327	0.334	3.35E-16	1	PTBP3
3.56E-20	0.423614989	0.238	0.2	8.66E-16	1	GAS2L3
4.97E-20	0.301009602	0.617	0.643	1.21E-15	1	TUBB4A
5.62E-20	0.280489446	0.317	0.47	1.37E-15	1	ENSMMUG00000058037
5.69E-20	0.269166561	0.231	0.338	1.39E-15	1	ATF7IP
6.67E-20	0.255201439	0.128	0.194	1.62E-15	1	ZBED4
1.69E-19	0.315187496	0.266	0.389	4.11E-15	1	ARL6IP5
2.40E-19	0.254122386	0.179	0.262	5.83E-15	1	BIRC6
5.26E-19	0.290154269	0.219	0.321	1.28E-14	1	BMPR2
5.32E-19	0.261543486	0.213	0.309	1.29E-14	1	PHACTR3
6.30E-19	0.263379024	0.295	0.433	1.53E-14	1	CADM4
8.45E-19	0.618493673	0.138	0.109	2.06E-14	1	ITPRIP
1.72E-18	0.264914196	0.294	0.428	4.18E-14	1	SF3A2
3.62E-18	0.310193073	0.221	0.324	8.80E-14	1	PAPSS1
4.62E-18	0.273085801	0.226	0.327	1.12E-13	1	ZNF195
5.03E-18	0.271076777	0.269	0.39	1.23E-13	1	CYFIP2
6.19E-18	0.285906393	0.204	0.297	1.51E-13	1	ATP2C1
9.03E-18	0.252474121	0.284	0.412	2.20E-13	1	MKRN1
1.05E-17	0.258966768	0.153	0.223	2.56E-13	1	KLHL7
1.10E-17	0.295152849	0.256	0.371	2.68E-13	1	PHF6
2.11E-17	0.274314557	0.149	0.218	5.14E-13	1	GPSM1
2.31E-17	0.260120944	0.26	0.374	5.62E-13	1	ZNF93
2.65E-17	0.298298029	0.17	0.247	6.46E-13	1	PPIP5K2
4.55E-17	0.285205896	0.103	0.155	1.11E-12	1	CDR2L
1.76E-16	0.380590173	0.549	0.632	4.29E-12	1	ENSMMUG00000064551
5.65E-16	0.30738123	0.204	0.293	1.37E-11	1	MEGF9
7.59E-16	0.324786208	0.292	0.412	1.85E-11	1	BDP1
7.79E-16	0.316758053	0.261	0.37	1.90E-11	1	ARID4A
9.07E-16	0.279410836	0.264	0.378	2.21E-11	1	PPP1R18
1.57E-15	0.357572677	0.235	0.338	3.81E-11	1	CARM1
2.37E-15	0.299847262	0.094	0.141	5.76E-11	1	NMT2
2.81E-15	0.300400905	0.298	0.428	6.83E-11	1	SLC39A6
7.11E-15	0.290606192	0.146	0.209	1.73E-10	1	CERK
8.21E-15	0.32495173	0.171	0.242	2.00E-10	1	MEIS3
9.38E-15	0.300796457	0.121	0.175	2.28E-10	1	BTN2A2
9.44E-15	0.35054344	0.16	0.229	2.30E-10	1	ENSMMUG00000042762
2.34E-14	0.28587169	0.197	0.277	5.70E-10	1	RASA1
3.55E-14	0.553497035	0.33	0.338	8.63E-10	1	ELAVL2
4.12E-14	0.292141163	0.588	0.657	1.00E-09	1	NSG1
4.54E-14	0.656161199	0.401	0.464	1.11E-09	1	C15H9orf152
1.18E-13	0.259543881	0.196	0.273	2.88E-09	1	GDAP1L1
1.41E-13	0.335368141	0.314	0.45	3.42E-09	1	RBM26
1.54E-13	0.301720855	0.308	0.436	3.74E-09	1	KIAA2026
1.96E-13	0.251231217	0.098	0.143	4.77E-09	1	KLHL8
2.39E-13	0.304851346	0.276	0.387	5.82E-09	1	CREB1
3.43E-13	0.564116578	0.124	0.102	8.35E-09	1	CSDC2
3.56E-13	0.27943677	0.263	0.368	8.67E-09	1	WDR47
5.94E-13	0.29713861	0.287	0.402	1.44E-08	1	MACO1
7.07E-13	0.273889944	0.201	0.277	1.72E-08	1	PLXNA2
1.64E-12	0.526704896	0.127	0.105	4.00E-08	1	ZNF704
2.20E-12	0.320738083	0.268	0.373	5.35E-08	1	CHD9
2.48E-12	0.324776162	0.196	0.271	6.03E-08	1	PELI1
2.82E-12	0.261418371	0.11	0.156	6.86E-08	1	AAK1
3.07E-12	0.681358593	0.22	0.212	7.46E-08	1	HERPUD2
3.10E-12	0.337303839	0.558	0.661	7.55E-08	1	FEZ1
4.99E-12	0.296246493	0.185	0.255	1.22E-07	1	PM20D2
5.52E-12	0.317146007	0.276	0.385	1.34E-07	1	ENSMMUG00000059486
6.69E-12	0.276148918	0.163	0.224	1.63E-07	1	CHD6
7.84E-12	0.25399194	0.359	0.502	1.91E-07	1	CBX5
8.41E-12	0.511116092	0.2	0.183	2.05E-07	1	ENOX1
9.33E-12	0.568258407	0.326	0.339	2.27E-07	1	GRIA1
3.09E-11	0.385727825	0.203	0.284	7.53E-07	1	NDUFA8
3.79E-11	0.250931696	0.136	0.186	9.22E-07	1	SEMA6C
4.82E-11	0.281017981	0.124	0.17	1.17E-06	1	GABPB1
5.31E-11	0.25611214	0.393	0.56	1.29E-06	1	UBE2R2
6.73E-11	0.302698352	0.201	0.274	1.64E-06	1	NETO2
6.98E-11	0.311482723	0.282	0.393	1.70E-06	1	RUSC1
7.45E-11	0.304072381	0.232	0.315	1.81E-06	1	CBX4
1.17E-10	0.267568951	0.219	0.294	2.84E-06	1	RUFY2
1.59E-10	0.330458917	0.133	0.182	3.87E-06	1	SENP7
1.80E-10	0.335767587	0.146	0.199	4.39E-06	1	MYO9A
1.98E-10	0.344095345	0.239	0.329	4.82E-06	1	HERC1
2.80E-10	0.290989473	0.121	0.166	6.81E-06	1	ARNT
5.81E-10	0.265000706	0.17	0.228	1.41E-05	1	CDK17
7.76E-10	0.370827995	0.239	0.328	1.89E-05	1	ALDH7A1
8.94E-10	0.303976746	0.193	0.26	2.17E-05	1	EPC1
2.29E-09	0.250827794	0.419	0.589	5.58E-05	1	BRD4
2.35E-09	0.35298899	0.212	0.286	5.71E-05	1	KIAA1841
3.01E-09	0.32572518	0.603	0.724	7.32E-05	1	ATRX
4.51E-09	0.30258598	0.148	0.199	0.000109692	1	NEDD4L
5.03E-09	0.422130195	0.121	0.165	0.000122494	1	ARL4A
6.41E-09	0.371913228	0.212	0.286	0.000156072	1	MAD2L2
7.79E-09	0.377313831	0.309	0.432	0.000189647	1	SEC14L1
8.88E-09	0.343869417	0.27	0.369	0.000216103	1	ENSMMUG00000012479
2.36E-08	0.297990226	0.526	0.607	0.000574356	1	CELF3
2.42E-08	0.298795402	0.569	0.69	0.000588305	1	LENG8
2.58E-08	0.684180805	0.29	0.315	0.000626674	1	ASTN1
2.88E-08	0.338572981	0.317	0.43	0.000701198	1	BOD1L1
3.29E-08	0.390607286	0.157	0.21	0.000800878	1	BCAT1
5.35E-08	0.2693039	0.41	0.571	0.001301301	1	EIF5
6.66E-08	0.386298657	0.329	0.458	0.001619739	1	FTO
7.57E-08	0.305780687	0.404	0.562	0.001843082	1	RB1CC1
8.74E-08	0.360086594	0.137	0.12	0.00212715	1	ELMO1
1.14E-07	0.526903382	0.411	0.487	0.002780765	1	RERE
1.33E-07	0.372153475	0.257	0.343	0.003244754	1	PRTFDC1
1.54E-07	0.322210743	0.356	0.492	0.003758397	1	EP300
1.95E-07	0.321647966	0.186	0.244	0.004743616	1	VPS37B
2.44E-07	0.314428163	0.085	0.114	0.005925414	1	AGA
2.45E-07	0.385390552	0.279	0.378	0.005970649	1	PLEKHO1
4.11E-07	0.252959604	0.34	0.454	0.009996947	1	CADM3
4.45E-07	0.356800015	0.124	0.162	0.01083151	1	HEXIM1
4.87E-07	0.639851926	0.138	0.127	0.011843644	1	TSPAN2
5.80E-07	0.657314093	0.141	0.131	0.014110444	1	RND2
6.00E-07	0.252929808	0.415	0.564	0.01460168	1	ZNF292
6.59E-07	0.319464601	0.129	0.169	0.016026526	1	CSRNP3
6.80E-07	0.286982644	0.193	0.249	0.01654341	1	RGMA
7.83E-07	0.250300423	0.514	0.557	0.019052951	1	SYT1
1.51E-06	0.280319807	0.394	0.545	0.036807606	1	KDM1A
1.77E-06	0.519193684	0.278	0.294	0.042999674	1	NUP93
1.84E-06	0.287739738	0.376	0.511	0.044844864	1	TPM4
2.18E-06	0.349595389	0.335	0.457	0.053149801	1	COMMD3
2.94E-06	0.33036464	0.39	0.541	0.071465261	1	HTATSF1
4.08E-06	0.317980813	0.226	0.292	0.099159462	1	RASSF2
5.19E-06	0.317392261	0.36	0.488	0.126195831	1	PBRM1
5.49E-06	0.350817526	0.123	0.158	0.13349956	1	ARHGEF10L
6.09E-06	0.331275672	0.328	0.439	0.14814864	1	DLGAP4
8.20E-06	0.294971324	0.082	0.106	0.199419939	1	TMEM179
8.40E-06	0.672226907	0.301	0.322	0.204439978	1	ID2
1.02E-05	0.405557497	0.227	0.296	0.246988324	1	PRSS55
1.41E-05	0.256908694	0.088	0.112	0.34388928	1	ENSMMUG00000054145
1.53E-05	0.34636859	0.127	0.162	0.37140128	1	VAV2
2.48E-05	0.260399181	0.436	0.599	0.602877876	1	RSRC2
3.39E-05	0.400433556	0.506	0.618	0.825378136	1	ARID4B
3.56E-05	0.287645118	0.408	0.559	0.865358892	1	PRRC2B
4.09E-05	0.314473896	0.296	0.385	0.99580941	1	KLF7
4.13E-05	0.3048237	0.408	0.56	1	1	ACIN1
4.68E-05	0.407624819	0.288	0.376	1	1	NRXN1
5.23E-05	0.332583595	0.116	0.147	1	1	SRRM4
6.04E-05	0.54823134	0.319	0.36	1	1	JAKMIP2
6.58E-05	0.307540877	0.321	0.421	1	1	ENSMMUG00000053163
6.66E-05	0.323304581	0.371	0.501	1	1	PARP1
8.00E-05	0.32796434	0.304	0.396	1	1	ATCAY
8.49E-05	0.352951416	0.118	0.149	1	1	HID1
8.93E-05	0.305414655	0.148	0.137	1	1	ENSMMUG00000058478
0.000144899	0.267317392	0.405	0.534	1	1	SLC38A1
0.000153222	0.321318635	0.382	0.52	1	1	SMARCE1
0.00026512	0.293030825	0.117	0.144	1	1	TSPYL2
0.000333116	0.45451446	0.278	0.359	1	1	BAZ2B
0.000362945	0.362062453	0.162	0.203	1	1	ANKRD50
0.000405464	0.310496001	0.089	0.111	1	1	ENSMMUG00000053435
0.001041966	0.618161312	0.344	0.414	1	1	BCL9
0.001111545	0.441728691	0.127	0.158	1	1	APBB2
0.001144529	0.504241351	0.268	0.348	1	1	CEBPZ
0.001146042	0.350214446	0.19	0.234	1	1	DHRS7
0.001270142	0.573596086	0.135	0.133	1	1	ENSMMUG00000059535
0.00172347	0.272850867	0.12	0.145	1	1	MTSS1
0.001942926	0.404564264	0.268	0.344	1	1	ZNF711
0.002039836	0.444282027	0.143	0.177	1	1	DPF1
0.002139715	0.493192876	0.272	0.296	1	1	ENSMMUG00000058820
0.002150493	0.587763642	0.234	0.256	1	1	RBM18
0.002617357	0.392586634	0.26	0.329	1	1	CBX2
0.00284739	0.343992675	0.475	0.55	1	1	SYNE2
0.003064407	0.3383503	0.13	0.157	1	1	SWT1
0.003067881	0.432595425	0.198	0.246	1	1	SESTD1
0.003139427	0.539404388	0.27	0.299	1	1	BIRC2
0.003261114	0.299662755	0.125	0.15	1	1	POU2F1
0.003422706	0.542235254	0.19	0.198	1	1	CCDC174
0.003811425	0.252235478	0.603	0.759	1	1	SON
0.004184008	0.581661633	0.307	0.358	1	1	DPYSL3
0.004216824	0.363763298	0.105	0.127	1	1	ZNF107
0.005252619	0.620134429	0.148	0.151	1	1	TOX
0.006473518	0.270546289	0.527	0.637	1	1	SEPTIN5
0.006718191	0.3671269	0.103	0.124	1	1	IQSEC1
0.00912004	0.374180397	0.293	0.374	1	1	CORO1C
0.0091201	0.408335377	0.383	0.449	1	1	SMPD3
0.0098908	0.489614653	0.383	0.47	1	1	MACF1
0	2.652187581	0.594	0.115	0	2	NR2F2
0	1.967044688	0.539	0.166	0	2	CXCR4
0	1.896143906	0.785	0.296	0	2	DLX1
0	1.868915997	0.318	0.047	0	2	SYNPR
0	1.73728168	0.923	0.415	0	2	ENSMMUG00000055860
0	1.680906667	0.65	0.316	0	2	ENSMMUG00000052013
0	1.616199824	0.302	0.08	0	2	PDZRN3
0	1.589732247	0.772	0.545	0	2	NR2F1
0	1.556592588	0.727	0.318	0	2	PLS3
0	1.537022128	0.41	0.216	0	2	PLK2
0	1.388193283	0.219	0.039	0	2	THRB
0	1.372299265	0.898	0.772	0	2	CCDC88A
0	1.300609234	0.288	0.099	0	2	DCN
0	1.252001937	0.344	0.141	0	2	RIPOR2
0	1.239939847	0.184	0.037	0	2	SPOCK3
0	1.199078296	0.485	0.222	0	2	DLX5
0	1.176386469	0.171	0.048	0	2	ENSMMUG00000052530
0	1.150679534	0.721	0.574	0	2	BTG1
0	1.14962941	0.518	0.232	0	2	DLX2
0	1.112430234	0.415	0.183	0	2	GAD1
0	1.048875279	0.82	0.72	0	2	CAMK2N1
0	0.896493459	0.105	0.018	0	2	GPD1
0	0.879230312	0.633	0.461	0	2	DCLK2
0	0.729841413	0.916	0.801	0	2	RTN1
0	0.605769702	0.973	0.967	0	2	ENSMMUG00000061824
1.20E-306	1.172734982	0.34	0.163	2.91E-302	2	ZNF536
3.96E-295	1.102241129	0.476	0.301	9.63E-291	2	SLAIN1
3.57E-284	0.813013898	0.108	0.023	8.68E-280	2	PROX1
1.95E-278	0.814634199	0.113	0.025	4.75E-274	2	ST8SIA5
2.48E-256	0.929013236	0.651	0.594	6.03E-252	2	TCF4
1.34E-244	0.978708785	0.102	0.023	3.26E-240	2	FILIP1L
4.97E-239	0.924980712	0.504	0.351	1.21E-234	2	CELF4
5.36E-219	1.30450935	0.302	0.17	1.30E-214	2	AP1S2
2.22E-202	0.852203239	0.286	0.144	5.41E-198	2	SLC32A1
7.24E-188	0.832188313	0.369	0.223	1.76E-183	2	SLC6A1
1.94E-174	0.778969838	0.622	0.543	4.73E-170	2	SYT1
9.36E-171	0.557030121	0.748	0.775	2.28E-166	2	ENSMMUG00000049324
1.28E-166	0.965866256	0.185	0.081	3.12E-162	2	CALB2
5.29E-158	0.478903924	0.803	0.834	1.29E-153	2	FNBP1L
2.56E-151	0.930401447	0.236	0.126	6.23E-147	2	ENSMMUG00000058478
7.40E-142	0.862539572	0.237	0.128	1.80E-137	2	SLC10A4
2.87E-139	0.948860147	0.308	0.191	6.98E-135	2	GAS2L3
6.47E-128	0.868747265	0.125	0.052	1.57E-123	2	RXRA
2.78E-113	0.475364193	0.735	0.743	6.77E-109	2	GNG2
5.51E-112	0.609004191	0.358	0.239	1.34E-107	2	GAD2
3.48E-106	0.329218007	0.806	0.753	8.48E-102	2	INA
3.21E-105	0.615045604	0.655	0.696	7.80E-101	2	FXYD6
4.22E-105	0.530840755	0.351	0.231	1.03E-100	2	SP9
5.20E-102	0.546652626	0.669	0.666	1.27E-97	2	UCHL1
9.04E-102	0.938163374	0.269	0.177	2.20E-97	2	ID4
1.87E-93	0.877433724	0.137	0.068	4.54E-89	2	PPFIBP1
5.46E-82	0.358046976	0.771	0.805	1.33E-77	2	APP
5.64E-81	0.958456346	0.272	0.199	1.37E-76	2	NRSN1
2.94E-79	0.499303317	0.64	0.66	7.15E-75	2	SOX4
2.22E-69	0.318797618	0.821	0.894	5.41E-65	2	DDX5
5.51E-68	0.391110021	0.716	0.749	1.34E-63	2	NCAM1
3.91E-66	0.965852373	0.395	0.377	9.53E-62	2	FAM172A
9.15E-64	0.797408981	0.447	0.429	2.23E-59	2	TCF12
1.92E-61	0.357157911	0.768	0.833	4.67E-57	2	CEP170
7.59E-61	0.685381587	0.36	0.301	1.85E-56	2	TMEM123
8.29E-58	1.067388165	0.221	0.165	2.02E-53	2	CNR1
1.19E-52	0.316416589	0.763	0.792	2.90E-48	2	CRMP1
2.40E-48	0.724124856	0.179	0.124	5.83E-44	2	MOB3B
3.06E-48	0.838230642	0.185	0.132	7.44E-44	2	SALL1
1.77E-46	0.887178043	0.221	0.171	4.30E-42	2	ANKS1B
3.94E-43	0.554984038	0.57	0.629	9.60E-39	2	ENSMMUG00000064551
1.09E-39	0.72967161	0.407	0.404	2.64E-35	2	MYCBP2
3.94E-38	0.786337007	0.13	0.088	9.60E-34	2	CAMK4
6.52E-38	0.668824372	0.513	0.572	1.59E-33	2	CTNNB1
2.30E-37	0.503530285	0.593	0.687	5.59E-33	2	LENG8
2.40E-36	0.285233557	0.741	0.812	5.83E-32	2	YWHAG
1.13E-35	0.68543685	0.163	0.117	2.76E-31	2	ENSMMUG00000063549
4.00E-33	0.509444149	0.577	0.646	9.74E-29	2	H1.0
3.87E-31	0.594940885	0.159	0.117	9.41E-27	2	ELMO1
1.53E-28	0.270017909	0.212	0.324	3.73E-24	2	TMEM184C
2.15E-27	0.513713311	0.499	0.533	5.22E-23	2	DST
7.47E-27	0.270023805	0.263	0.398	1.82E-22	2	GATAD2B
8.07E-27	0.261283788	0.11	0.178	1.96E-22	2	STX2
2.17E-26	0.318813711	0.658	0.738	5.28E-22	2	C4H6orf136
4.07E-26	0.265869878	0.198	0.301	9.90E-22	2	RNF40
2.56E-25	0.46209585	0.117	0.08	6.24E-21	2	ENSMMUG00000058315
3.03E-25	0.261088102	0.272	0.405	7.38E-21	2	TRIM24
3.69E-24	0.265253886	0.242	0.357	8.97E-20	2	ANKIB1
3.86E-24	0.270171465	0.214	0.315	9.40E-20	2	ANKRD26
2.38E-23	0.340675933	0.668	0.778	5.79E-19	2	DYNC1I2
8.38E-23	0.265063488	0.135	0.206	2.04E-18	2	FBXO9
1.54E-22	0.544069768	0.451	0.483	3.75E-18	2	ELAVL4
1.22E-21	0.250821611	0.12	0.184	2.96E-17	2	TPM1
1.60E-21	0.45338135	0.573	0.658	3.89E-17	2	ANKRD12
1.83E-21	0.340812172	0.371	0.543	4.45E-17	2	HTATSF1
3.32E-21	0.266928039	0.278	0.408	8.08E-17	2	MAGEH1
4.11E-21	0.254981855	0.217	0.317	1.00E-16	2	SUN2
6.05E-21	0.277600994	0.182	0.265	1.47E-16	2	ACAP2
9.20E-21	0.423019247	0.561	0.633	2.24E-16	2	SEPTIN5
1.07E-20	0.299922087	0.228	0.332	2.60E-16	2	DUSP18
1.20E-20	0.349272633	0.631	0.743	2.92E-16	2	KIF2A
3.44E-20	0.25112648	0.122	0.184	8.38E-16	2	RGS12
4.55E-20	0.280278368	0.182	0.266	1.11E-15	2	VGLL4
5.28E-20	0.571059911	0.429	0.455	1.29E-15	2	ATP1B1
5.80E-20	0.614417914	0.331	0.326	1.41E-15	2	CHD7
7.74E-20	0.250746945	0.164	0.24	1.88E-15	2	CSPP1
1.43E-19	0.321885234	0.257	0.375	3.47E-15	2	OSBPL8
1.50E-19	0.292255198	0.155	0.228	3.65E-15	2	ENSMMUG00000022140
1.59E-19	0.66960071	0.163	0.133	3.87E-15	2	ACVR1
4.85E-19	0.300753785	0.185	0.269	1.18E-14	2	ULK2
1.01E-18	0.284959293	0.296	0.428	2.45E-14	2	SF3A2
1.30E-18	0.310576462	0.185	0.268	3.16E-14	2	ENSMMUG00000008718
2.30E-18	0.286431818	0.342	0.494	5.59E-14	2	SLTM
2.99E-18	0.278937896	0.172	0.249	7.28E-14	2	ANKZF1
3.71E-18	0.28332545	0.277	0.402	9.04E-14	2	ZSCAN18
6.34E-18	0.289345956	0.24	0.344	1.54E-13	2	OGT
1.52E-17	0.482605627	0.448	0.489	3.69E-13	2	ENSMMUG00000065246
3.69E-17	0.745896297	0.321	0.328	8.97E-13	2	NCOA3
4.41E-17	0.322751924	0.301	0.435	1.07E-12	2	BEX2
4.53E-17	0.270741974	0.646	0.724	1.10E-12	2	RBFOX2
1.06E-16	0.305207943	0.202	0.288	2.58E-12	2	MAD2L2
1.27E-16	0.300867039	0.271	0.386	3.08E-12	2	GIGYF1
2.30E-16	0.290385697	0.307	0.431	5.59E-12	2	BOD1L1
2.79E-16	0.295939513	0.301	0.43	6.80E-12	2	TMEM259
4.24E-16	0.297152018	0.274	0.39	1.03E-11	2	DMTF1
7.06E-16	0.52637417	0.13	0.104	1.72E-11	2	PCDH9
1.10E-15	0.292631471	0.111	0.164	2.67E-11	2	SAT2
1.26E-15	0.387548974	0.186	0.267	3.07E-11	2	ENSMMUG00000002273
1.31E-15	0.303762039	0.607	0.692	3.20E-11	2	SCG3
1.87E-15	0.27549573	0.123	0.178	4.56E-11	2	DTX1
2.26E-15	0.285509032	0.1	0.147	5.49E-11	2	SH3GLB2
3.62E-15	0.253495938	0.37	0.527	8.82E-11	2	DHX36
5.72E-15	0.266535483	0.295	0.417	1.39E-10	2	SPINT2
7.43E-15	0.39500492	0.525	0.583	1.81E-10	2	ZEB2
1.09E-14	0.331488885	0.226	0.316	2.66E-10	2	CBX4
1.39E-14	0.340486428	0.188	0.266	3.37E-10	2	GSE1
1.94E-14	0.273513701	0.158	0.222	4.72E-10	2	DIP2C
2.04E-14	0.340089069	0.18	0.253	4.97E-10	2	CSNK1G3
2.48E-14	0.27486346	0.354	0.504	6.04E-10	2	SNRPN
2.63E-14	0.35065482	0.227	0.321	6.39E-10	2	MRFAP1L1
3.21E-14	0.321426372	0.266	0.37	7.81E-10	2	ARID4A
3.75E-14	0.29153375	0.199	0.276	9.13E-10	2	NBR1
5.41E-14	0.253816223	0.085	0.126	1.32E-09	2	RNF112
1.62E-13	0.276165242	0.184	0.254	3.94E-09	2	LMBR1L
4.29E-13	0.274433417	0.216	0.295	1.04E-08	2	THY1
4.49E-13	0.525544564	0.179	0.156	1.09E-08	2	ZCCHC12
1.17E-12	0.330258015	0.138	0.193	2.84E-08	2	AP3M2
1.35E-12	0.326505664	0.126	0.178	3.27E-08	2	RAB8B
3.28E-12	0.353467165	0.461	0.49	7.98E-08	2	NFIB
3.45E-12	0.261049713	0.105	0.148	8.39E-08	2	GRB10
4.48E-12	0.256541905	0.396	0.562	1.09E-07	2	WNK1
7.45E-12	0.349753417	0.195	0.269	1.81E-07	2	CLK4
1.12E-11	0.267081244	0.403	0.563	2.73E-07	2	RSF1
1.17E-11	0.340466655	0.174	0.239	2.85E-07	2	MAPRE3
1.66E-11	0.287355324	0.579	0.658	4.03E-07	2	NSG1
2.74E-11	0.640960225	0.227	0.218	6.66E-07	2	DAPK1
4.89E-11	0.289301294	0.186	0.249	1.19E-06	2	LITAF
5.30E-11	0.303845866	0.193	0.261	1.29E-06	2	EPC1
7.07E-11	0.290270889	0.142	0.193	1.72E-06	2	ENSMMUG00000055011
7.09E-11	0.306735241	0.587	0.714	1.72E-06	2	MARCHF6
7.46E-11	0.584765678	0.374	0.414	1.82E-06	2	ENSMMUG00000053163
8.17E-11	0.329870685	0.307	0.426	1.99E-06	2	SLC39A6
8.67E-11	0.306947513	0.13	0.178	2.11E-06	2	SPSB3
1.15E-10	0.348292971	0.601	0.709	2.80E-06	2	AKAP9
1.41E-10	0.404317532	0.111	0.155	3.42E-06	2	C1H1orf198
1.47E-10	0.402679214	0.101	0.081	3.57E-06	2	KCNA3
2.05E-10	0.673368727	0.314	0.335	5.00E-06	2	NAP1L3
2.99E-10	0.474111142	0.479	0.578	7.28E-06	2	TERF2IP
3.05E-10	0.3707488	0.436	0.469	7.42E-06	2	QKI
3.74E-10	0.27973839	0.096	0.133	9.10E-06	2	ASB3
7.01E-10	0.332008725	0.302	0.413	1.71E-05	2	VASH1
7.01E-10	0.250065369	0.379	0.515	1.71E-05	2	KAT6B
8.65E-10	0.35066651	0.129	0.175	2.10E-05	2	DENND5B
2.13E-09	0.262751226	0.296	0.393	5.20E-05	2	SV2A
3.31E-09	0.516142866	0.401	0.45	8.04E-05	2	ST8SIA2
3.43E-09	0.365002309	0.106	0.144	8.34E-05	2	PPAT
5.35E-09	0.534012347	0.287	0.291	0.000130083	2	MTUS1
5.88E-09	0.298098209	0.325	0.437	0.000142969	2	AFAP1
1.33E-08	0.33519357	0.32	0.434	0.000324723	2	KIAA2026
1.48E-08	0.307292477	0.186	0.244	0.000361272	2	VPS37B
1.50E-08	0.309677892	0.208	0.272	0.000366162	2	REV3L
1.55E-08	0.684562868	0.231	0.232	0.000375965	2	CERS5
1.69E-08	0.291251253	0.142	0.188	0.000411488	2	TMCC1
2.62E-08	0.429552021	0.203	0.272	0.000638313	2	ZNF428
2.88E-08	0.309434142	0.326	0.439	0.000701115	2	DLGAP4
3.27E-08	0.268942917	0.181	0.236	0.000795655	2	DHRS7
3.57E-08	0.343091296	0.202	0.266	0.000869198	2	CENPC
4.04E-08	0.258788152	0.611	0.712	0.000982902	2	ENSMMUG00000000671
6.14E-08	0.316377022	0.248	0.326	0.001493445	2	ENSMMUG00000055794
2.41E-07	0.269225524	0.415	0.57	0.005867707	2	EIF5
2.61E-07	0.27789793	0.084	0.112	0.006361257	2	GPR153
2.64E-07	0.268827584	0.622	0.745	0.006424645	2	PSIP1
3.38E-07	0.276158122	0.107	0.09	0.008223634	2	FAM222A
7.01E-07	0.329021795	0.33	0.445	0.017064023	2	TPGS2
7.87E-07	0.28818255	0.616	0.758	0.019140147	2	SON
8.28E-07	0.452643016	0.182	0.171	0.020150384	2	ST8SIA4
1.06E-06	0.258287337	0.414	0.558	0.02572408	2	GNAQ
1.36E-06	0.312983183	0.351	0.468	0.03307076	2	CCDC112
1.42E-06	0.278437167	0.112	0.145	0.034469164	2	TSC22D3
2.61E-06	0.303898352	0.295	0.385	0.063626116	2	KLF7
2.96E-06	0.354551063	0.297	0.392	0.071933809	2	TMOD2
3.11E-06	0.267315704	0.38	0.506	0.075704342	2	CCNG2
3.66E-06	0.28811983	0.605	0.743	0.089034314	2	CBX1
4.05E-06	0.270360462	0.114	0.145	0.098619167	2	TSPYL2
4.74E-06	0.269230782	0.601	0.725	0.11529685	2	TCAF1
6.57E-06	0.274176079	0.373	0.494	0.159900814	2	APC2
6.82E-06	0.400035769	0.206	0.265	0.165964031	2	BCOR
8.30E-06	0.287223929	0.305	0.396	0.201934579	2	ATCAY
1.90E-05	0.374468609	0.173	0.221	0.461951997	2	CDC42EP4
2.21E-05	0.344274575	0.337	0.45	0.537169471	2	STX7
2.47E-05	0.333232027	0.126	0.16	0.600929551	2	PTPRO
2.59E-05	0.326523698	0.125	0.158	0.630585051	2	CADM1
2.71E-05	0.273600167	0.125	0.156	0.659374143	2	KDM7A
3.75E-05	0.273199591	0.453	0.613	0.912017333	2	U2SURP
3.94E-05	0.341368621	0.388	0.53	0.958978893	2	FAM127C
4.97E-05	0.292445116	0.589	0.738	1	2	DDX39B
5.49E-05	0.43297416	0.236	0.306	1	2	FAM110B
8.76E-05	0.581866356	0.389	0.463	1	2	H1FX
9.24E-05	0.375086931	0.181	0.227	1	2	CDK17
0.000136136	0.27352168	0.082	0.103	1	2	CLASP1
0.000153014	0.251014054	0.607	0.756	1	2	RAB11B
0.00025431	0.366493729	0.24	0.303	1	2	BIRC2
0.000268257	0.354128635	0.512	0.616	1	2	APC
0.000341946	0.29888987	0.146	0.179	1	2	DLGAP1
0.00041884	0.261957545	0.113	0.138	1	2	KIF26A
0.000497457	0.336461806	0.153	0.187	1	2	STOX2
0.000500349	0.473167933	0.415	0.502	1	2	NDN
0.000507434	0.550835612	0.274	0.295	1	2	DCLK1
0.000669021	0.407393797	0.187	0.233	1	2	ARNT2
0.000718166	0.314111289	0.545	0.68	1	2	BEX1
0.000756208	0.256106683	0.101	0.122	1	2	FAM214A
0.000934191	0.336718322	0.541	0.686	1	2	ARGLU1
0.000985694	0.313918196	0.12	0.147	1	2	ASIC1
0.00106212	0.415083394	0.208	0.26	1	2	SP4
0.001194833	0.572363576	0.149	0.148	1	2	ENSMMUG00000051498
0.001269495	0.590825699	0.315	0.36	1	2	JAKMIP2
0.001328751	0.512693561	0.149	0.147	1	2	POU2F1
0.001748649	0.403356615	0.3	0.384	1	2	TNRC6C
0.001883532	0.309646857	0.122	0.147	1	2	PAG1
0.002176883	0.387577471	0.103	0.125	1	2	MNS1
0.002677093	0.410993467	0.257	0.268	1	2	SATB1
0.002762166	0.3227213	0.105	0.127	1	2	SLITRK2
0.003180251	0.2530803	0.41	0.525	1	2	KIF3C
0.00351915	0.403805303	0.498	0.619	1	2	ARID4B
0.003686657	0.367617395	0.286	0.359	1	2	PCDHAC2
0.003748232	0.473414295	0.269	0.288	1	2	ARL4D
0.00391548	0.435781578	0.144	0.175	1	2	PELI2
0.004297807	0.587804155	0.171	0.176	1	2	EPHA5
0.005180378	0.263882281	0.592	0.737	1	2	BCLAF1
0.005260664	0.472462379	0.179	0.221	1	2	GSTM3
0.005272716	0.381019624	0.232	0.285	1	2	MYT1L
0.006078175	0.268911577	0.54	0.664	1	2	FEZ1
0.006444154	0.327565712	0.101	0.12	1	2	PLPP5
0.007555497	0.343570906	0.457	0.542	1	2	GNAO1
0	1.792291407	0.919	0.291	0	3	NEUROD6
0	1.660575289	0.929	0.266	0	3	NEUROD2
0	1.643351354	0.796	0.243	0	3	TBR1
0	1.605250345	0.809	0.249	0	3	NEFM
0	1.591284537	0.87	0.216	0	3	SLA
0	1.489365961	0.795	0.235	0	3	CYRIA
0	1.465718909	0.962	0.496	0	3	ZBTB18
0	1.407565042	0.408	0.074	0	3	PPP1R1B
0	1.338280742	0.838	0.273	0	3	SYT4
0	1.31214106	0.351	0.119	0	3	FEZF2
0	1.299718578	0.53	0.255	0	3	LMO3
0	1.293147214	0.775	0.213	0	3	MPPED1
0	1.267406153	0.786	0.338	0	3	CSRP2
0	1.255872181	0.624	0.138	0	3	DAB1
0	1.234281371	0.796	0.257	0	3	NELL2
0	1.172001421	0.902	0.4	0	3	GAP43
0	1.125940791	0.609	0.134	0	3	NDRG1
0	1.118375802	0.679	0.239	0	3	NUAK1
0	1.109683215	0.997	0.844	0	3	STMN2
0	1.09739935	0.689	0.271	0	3	PPP2R2B
0	1.093280911	0.578	0.123	0	3	ELMOD1
0	0.970561158	0.799	0.31	0	3	MEF2C
0	0.967931967	0.997	0.883	0	3	GPM6A
0	0.955227754	0.627	0.218	0	3	B3GAT1
0	0.955129275	0.549	0.139	0	3	ARPP21
0	0.949493378	0.608	0.231	0	3	RNF182
0	0.946443335	0.642	0.238	0	3	CHRDL1
0	0.923085232	0.526	0.154	0	3	GPR85
0	0.920924812	0.868	0.382	0	3	L1CAM
0	0.914951285	0.593	0.182	0	3	EML1
0	0.900352494	0.881	0.452	0	3	BCL11A
0	0.891448023	0.42	0.137	0	3	SOX5
0	0.888799686	0.66	0.241	0	3	CTTNBP2
0	0.888605503	0.584	0.184	0	3	PRDM8
0	0.874234557	0.693	0.331	0	3	ENSMMUG00000059728
0	0.869712367	0.758	0.461	0	3	NFIB
0	0.869531413	0.332	0.111	0	3	MASP1
0	0.861828756	0.572	0.222	0	3	GPAM
0	0.858560228	0.902	0.506	0	3	NME2
0	0.857498734	0.525	0.213	0	3	SRM
0	0.854533831	0.606	0.196	0	3	ISLR2
0	0.838044434	0.619	0.209	0	3	LINGO1
0	0.832295324	0.925	0.447	0	3	PTPRZ1
0	0.827004805	0.75	0.374	0	3	SSBP2
0	0.823886494	0.691	0.295	0	3	FAM3C
0	0.821873062	0.444	0.11	0	3	SLC17A7
0	0.817728993	0.967	0.675	0	3	SPTAN1
0	0.805622424	0.923	0.577	0	3	SSBP3
0	0.804052012	0.654	0.243	0	3	CAP2
0	0.800336131	0.408	0.117	0	3	ADCY1
0	0.78320918	0.591	0.211	0	3	SYP
0	0.779571121	0.778	0.395	0	3	ENSMMUG00000061128
0	0.76682276	0.752	0.299	0	3	GRIA1
0	0.759551868	0.751	0.341	0	3	MMD
0	0.756328842	0.252	0.068	0	3	PRSS12
0	0.755737072	0.99	0.814	0	3	ENSMMUG00000060287
0	0.737751264	0.424	0.093	0	3	RBFOX1
0	0.726881964	0.271	0.053	0	3	TMOD1
0	0.724435457	0.827	0.369	0	3	MAPT
0	0.722620351	0.939	0.604	0	3	SEPTIN3
0	0.717789975	0.671	0.237	0	3	ADCYAP1R1
0	0.708237267	0.731	0.299	0	3	TMEM59L
0	0.705918307	0.803	0.469	0	3	ENC1
0	0.696509948	0.837	0.494	0	3	YWHAH
0	0.696346593	0.343	0.109	0	3	MB21D2
0	0.694458353	0.847	0.499	0	3	RAP2A
0	0.692441121	0.661	0.328	0	3	AKT3
0	0.690344214	0.369	0.092	0	3	GABRA3
0	0.684158116	0.612	0.23	0	3	EEF1A2
0	0.683983956	0.26	0.06	0	3	CCN3
0	0.680285187	0.271	0.086	0	3	GLRA2
0	0.678372981	0.803	0.534	0	3	FABP7
0	0.67685885	0.742	0.391	0	3	FDFT1
0	0.674745766	0.293	0.07	0	3	CAMK2B
0	0.672429876	0.599	0.243	0	3	MYCN
0	0.670143796	0.537	0.192	0	3	PCLO
0	0.659194017	0.859	0.502	0	3	SREBF2
0	0.655580054	0.961	0.713	0	3	TMSB10
0	0.6542646	0.688	0.331	0	3	SC5D
0	0.653747715	0.773	0.331	0	3	JPH4
0	0.652544814	0.626	0.288	0	3	PRXL2A
0	0.64592499	0.936	0.612	0	3	TUBB4A
0	0.644692527	0.399	0.109	0	3	ENSMMUG00000061242
0	0.641734154	0.952	0.658	0	3	CTXN1
0	0.634647635	0.254	0.064	0	3	CDH13
0	0.633234408	0.794	0.458	0	3	HMGCS1
0	0.631137869	0.232	0.044	0	3	GREM2
0	0.63025687	0.406	0.146	0	3	CHGA
0	0.630126039	0.417	0.134	0	3	CLMP
0	0.614784602	0.377	0.109	0	3	SLC44A5
0	0.614479458	0.572	0.217	0	3	NFIX
0	0.610044057	0.722	0.324	0	3	GNAI1
0	0.609272348	0.989	0.862	0	3	YWHAZ
0	0.600345404	0.556	0.241	0	3	RAP1GDS1
0	0.600175424	0.978	0.738	0	3	CDK5R1
0	0.599115284	0.634	0.261	0	3	PAK5
0	0.596540043	0.585	0.21	0	3	PGM2L1
0	0.595263763	0.556	0.242	0	3	TBC1D25
0	0.593962871	0.848	0.486	0	3	CPE
0	0.593686375	0.371	0.138	0	3	EPB41L3
0	0.592855483	0.874	0.566	0	3	DYNLL1
0	0.585723686	0.676	0.292	0	3	SEZ6
0	0.585645234	0.345	0.092	0	3	PODXL
0	0.57813418	0.354	0.1	0	3	FAT4
0	0.577264632	0.311	0.078	0	3	GAS7
0	0.571067451	0.296	0.073	0	3	NPTX1
0	0.570602081	0.988	0.842	0	3	DPYSL2
0	0.56939959	0.276	0.058	0	3	MCTP1
0	0.569058514	0.559	0.25	0	3	RAI14
0	0.5686407	0.569	0.251	0	3	SMARCA2
0	0.557669307	0.402	0.139	0	3	NEUROD1
0	0.557254097	0.744	0.375	0	3	WASF1
0	0.556452395	0.707	0.386	0	3	SQLE
0	0.55028875	0.59	0.28	0	3	NBEA
0	0.544390281	0.366	0.129	0	3	XPR1
0	0.543947659	0.252	0.07	0	3	MCUR1
0	0.543264338	0.948	0.709	0	3	HNRNPH2
0	0.542663922	0.504	0.169	0	3	SULT4A1
0	0.540644079	0.546	0.233	0	3	FGF13
0	0.539821268	0.535	0.254	0	3	C2H3orf14
0	0.538659677	0.992	0.83	0	3	TUBB3
0	0.538552608	0.338	0.096	0	3	PRRT1
0	0.53757718	0.514	0.217	0	3	CEP85L
0	0.536971262	0.411	0.16	0	3	POLE4
0	0.53391023	0.527	0.205	0	3	DOK6
0	0.523266914	0.377	0.121	0	3	ACTR3B
0	0.522069924	0.204	0.041	0	3	PDE1A
0	0.521698042	0.651	0.322	0	3	SMS
0	0.520999558	0.419	0.143	0	3	ARAP1
0	0.520591093	0.838	0.46	0	3	ATP1A3
0	0.516110294	0.235	0.05	0	3	SATB2
0	0.512848106	0.385	0.157	0	3	RAC3
0	0.510239019	0.773	0.37	0	3	MLLT3
0	0.509499084	0.997	0.942	0	3	TUBB
0	0.508286634	0.348	0.11	0	3	EPHB1
0	0.507264963	0.925	0.587	0	3	STXBP1
0	0.506910485	0.976	0.796	0	3	TTC3
0	0.504479179	0.369	0.109	0	3	JAKMIP1
0	0.504098784	0.434	0.174	0	3	FAM13A
0	0.50233607	0.364	0.142	0	3	LIMCH1
0	0.500119252	0.415	0.162	0	3	NEO1
0	0.499757035	0.517	0.222	0	3	ACOT7
0	0.495037352	0.756	0.414	0	3	ACAD10
0	0.49423311	0.356	0.101	0	3	ASNS
0	0.49230387	0.973	0.771	0	3	CRMP1
0	0.49160533	0.886	0.533	0	3	GRIA2
0	0.490812331	0.785	0.437	0	3	CHD3
0	0.487431803	0.228	0.044	0	3	FRMD3
0	0.487365145	0.17	0.026	0	3	SEMA3E
0	0.484875575	0.836	0.476	0	3	RAB3D
0	0.483490256	0.824	0.479	0	3	RAB6A
0	0.478947335	0.623	0.254	0	3	THY1
0	0.475820202	0.709	0.355	0	3	BZW2
0	0.475129829	1	0.994	0	3	TUBA1A
0	0.473467184	0.47	0.196	0	3	KCTD13
0	0.472637332	0.773	0.416	0	3	ENSMMUG00000010236
0	0.468610643	0.416	0.172	0	3	FRMD4B
0	0.466933057	0.932	0.648	0	3	SERINC1
0	0.465941894	0.837	0.481	0	3	KIF3C
0	0.465837202	0.4	0.148	0	3	AGTPBP1
0	0.465613578	0.673	0.326	0	3	EZR
0	0.45884137	0.264	0.08	0	3	KIT
0	0.458741551	0.926	0.558	0	3	SHTN1
0	0.456153436	0.717	0.349	0	3	TMOD2
0	0.455707492	0.758	0.415	0	3	SHOC2
0	0.455611806	0.793	0.433	0	3	KIFAP3
0	0.453750582	0.288	0.074	0	3	DLG2
0	0.453665454	0.644	0.317	0	3	B4GALT5
0	0.452848039	0.327	0.117	0	3	SHC3
0	0.449399267	0.476	0.197	0	3	HCFC1R1
0	0.448020618	0.924	0.597	0	3	SEPTIN5
0	0.447720267	0.582	0.249	0	3	TNIK
0	0.446544228	0.59	0.271	0	3	KIAA0930
0	0.44435699	0.475	0.194	0	3	DNAJB5
0	0.440916292	0.991	0.797	0	3	RTN1
0	0.440408901	0.812	0.469	0	3	THRA
0	0.43581827	0.329	0.117	0	3	DNM1
0	0.4357212	0.412	0.17	0	3	PRRT2
0	0.42804046	0.497	0.189	0	3	PALMD
0	0.427617836	0.882	0.521	0	3	SYT1
0	0.425693255	0.808	0.408	0	3	SH3BP5
0	0.42314569	0.374	0.143	0	3	FAM126A
0	0.422989218	0.733	0.349	0	3	SV2A
0	0.411208366	0.269	0.077	0	3	C12H2orf80
0	0.399345353	0.515	0.231	0	3	CDKN2D
0	0.397069152	0.685	0.351	0	3	FOXG1
0	0.392681943	0.645	0.321	0	3	SCG5
0	0.387395358	0.449	0.178	0	3	NXPH4
0	0.386054797	0.243	0.063	0	3	CAMKV
0	0.380766845	0.801	0.426	0	3	SYT5
0	0.379184188	0.27	0.083	0	3	FKBP1B
0	0.378823225	0.435	0.167	0	3	RBFOX3
0	0.377543843	0.2	0.039	0	3	ANKRD34A
0	0.376437952	1	0.984	0	3	TUBB2B
0	0.375417255	0.441	0.184	0	3	REEP2
0	0.371582465	0.335	0.12	0	3	PSD
0	0.368975434	0.208	0.051	0	3	ARHGEF3
0	0.363462251	0.535	0.233	0	3	TCEAL5
0	0.354374535	0.389	0.153	0	3	DPF1
0	0.346624894	0.338	0.123	0	3	LARGE1
0	0.346337859	0.357	0.124	0	3	SLC8A2
0	0.342437227	0.429	0.174	0	3	SYN1
0	0.320512713	0.15	0.028	0	3	PHYHIP
0	0.317602546	0.308	0.105	0	3	LRRC7
0	0.314344927	0.615	0.285	0	3	SEZ6L2
0	0.260603996	0.127	0.022	0	3	GAREM1
1.64E-307	0.40575314	0.349	0.133	3.98E-303	3	C1GALT1
2.63E-305	0.401803737	0.564	0.27	6.40E-301	3	CRIP2
3.50E-305	0.421932825	0.436	0.187	8.52E-301	3	COTL1
1.79E-304	0.340560602	0.321	0.117	4.35E-300	3	ENSMMUG00000062486
2.12E-304	0.379704119	0.34	0.128	5.16E-300	3	SEMA3A
1.73E-303	0.462745935	0.949	0.64	4.21E-299	3	UCHL1
1.54E-302	0.305945841	0.551	0.251	3.76E-298	3	SNAP91
1.84E-302	0.423830625	0.845	0.503	4.48E-298	3	GNAO1
1.95E-301	0.349377055	0.661	0.333	4.75E-297	3	MTURN
4.53E-301	0.35170845	0.436	0.185	1.10E-296	3	PLPPR2
1.28E-300	0.449928218	0.844	0.506	3.11E-296	3	RHOB
2.56E-300	0.463325883	0.832	0.498	6.22E-296	3	MAPRE2
2.53E-299	0.399165203	0.992	0.895	6.16E-295	3	MAP1B
5.17E-298	0.385440641	0.54	0.258	1.26E-293	3	B4GALT2
1.60E-295	0.379766995	0.664	0.345	3.89E-291	3	CPEB4
3.56E-295	0.423334278	0.977	0.788	8.66E-291	3	YWHAG
3.90E-295	0.313741894	0.245	0.077	9.49E-291	3	PLPPR1
1.08E-294	0.492220473	0.358	0.141	2.63E-290	3	THBS1
1.29E-294	0.359990681	0.559	0.265	3.13E-290	3	ENSMMUG00000063699
1.76E-294	0.358611073	0.621	0.313	4.28E-290	3	PPP3CB
8.04E-294	0.391389054	0.401	0.169	1.96E-289	3	PTDSS1
9.99E-294	0.44088662	0.862	0.534	2.43E-289	3	AASDHPPT
5.43E-293	0.326760095	0.557	0.263	1.32E-288	3	PRSS55
1.39E-292	0.322928488	0.257	0.085	3.37E-288	3	GPD1L
6.69E-292	0.304544453	0.564	0.265	1.63E-287	3	ENO2
1.13E-291	0.636413363	0.709	0.402	2.75E-287	3	EIF1B
1.86E-291	0.363870187	0.26	0.087	4.52E-287	3	SORD
7.31E-291	0.382348531	0.637	0.328	1.78E-286	3	SYNGAP1
2.45E-290	0.369227181	0.527	0.244	5.96E-286	3	PLXNA2
5.98E-290	0.255455154	0.147	0.033	1.45E-285	3	SNCB
1.63E-289	0.33728691	0.54	0.254	3.98E-285	3	PCSK1N
3.54E-289	0.287172734	0.515	0.236	8.61E-285	3	SCAMP5
4.36E-288	0.368144723	0.991	0.897	1.06E-283	3	CCNI
8.55E-288	0.34905366	0.389	0.161	2.08E-283	3	CCDC92
1.14E-287	0.435202911	0.965	0.721	2.76E-283	3	GNG2
8.09E-287	0.536853628	0.707	0.398	1.97E-282	3	HMGCR
2.22E-286	0.329261892	0.309	0.113	5.40E-282	3	ENSMMUG00000055209
4.41E-286	0.379511477	0.763	0.431	1.07E-281	3	PPP3CA
3.54E-285	0.39745836	0.549	0.27	8.61E-281	3	ENSMMUG00000006397
6.17E-285	0.421346311	0.267	0.093	1.50E-280	3	WWC1
5.12E-284	0.310134166	0.266	0.09	1.25E-279	3	SHB
5.20E-284	0.346689885	0.484	0.22	1.27E-279	3	SRGAP1
2.96E-283	0.460326841	0.843	0.512	7.19E-279	3	EEF1B2
8.81E-283	0.295947336	0.17	0.043	2.14E-278	3	CPLX1
1.33E-280	0.326912195	0.375	0.152	3.25E-276	3	TMEM150C
1.59E-280	0.347522429	0.458	0.207	3.87E-276	3	TMEM94
3.05E-280	0.403885729	0.73	0.409	7.43E-276	3	RNF187
7.10E-280	0.319539707	0.646	0.329	1.73E-275	3	WDR47
1.90E-279	0.423384147	0.621	0.327	4.62E-275	3	IDH1
3.34E-279	0.496551949	0.898	0.616	8.13E-275	3	EEF2
4.18E-279	0.274329765	0.159	0.039	1.02E-274	3	ATP8A2
6.10E-278	0.367933576	0.401	0.173	1.49E-273	3	BCAP29
1.82E-277	0.344410724	0.877	0.525	4.43E-273	3	OLFM2
2.74E-277	0.368813688	0.272	0.094	6.68E-273	3	RPRM
3.31E-277	0.305496598	0.386	0.16	8.06E-273	3	ANKH
1.76E-276	0.360505656	0.556	0.276	4.28E-272	3	ENSMMUG00000044916
2.08E-276	0.400320221	0.983	0.874	5.05E-272	3	RPL37A
3.49E-276	0.36242157	0.397	0.168	8.49E-272	3	OCIAD2
3.54E-276	0.273964698	0.567	0.272	8.62E-272	3	PHACTR3
6.64E-276	0.639671861	0.532	0.275	1.62E-271	3	INSIG1
2.82E-275	0.330749441	0.261	0.089	6.86E-271	3	DMTN
2.96E-275	0.301598602	0.25	0.082	7.21E-271	3	GABRG2
5.15E-275	0.324862246	0.557	0.274	1.25E-270	3	GET1
1.87E-274	0.295359336	0.287	0.102	4.55E-270	3	TTC28
1.88E-274	0.388890118	0.349	0.143	4.57E-270	3	USB1
2.72E-274	0.379549981	0.598	0.308	6.62E-270	3	SSU72
3.37E-274	0.394124916	0.987	0.831	8.21E-270	3	MLLT11
6.09E-274	0.407503274	0.742	0.418	1.48E-269	3	DPYSL5
2.77E-273	0.311338309	0.56	0.276	6.74E-269	3	PFKM
4.35E-272	0.363501934	0.499	0.234	1.06E-267	3	CXADR
1.47E-271	0.309212722	0.224	0.07	3.58E-267	3	IGSF21
1.84E-271	0.439965951	0.696	0.391	4.49E-267	3	ENSMMUG00000064760
2.03E-270	0.302085491	0.996	0.958	4.95E-266	3	CFL1
2.40E-270	0.262273511	0.328	0.125	5.84E-266	3	SLC1A1
2.81E-270	0.340484813	0.468	0.217	6.83E-266	3	AGAP3
3.15E-270	0.365712392	0.991	0.888	7.67E-266	3	RTN4
2.85E-268	0.347023751	0.681	0.364	6.94E-264	3	PREPL
3.16E-268	0.394409197	0.588	0.303	7.68E-264	3	TKT
6.84E-268	0.250794765	0.373	0.153	1.67E-263	3	ENSMMUG00000059804
9.91E-268	0.31677267	0.999	0.983	2.41E-263	3	STMN1
1.48E-267	0.424929083	0.509	0.251	3.59E-263	3	ABCD3
4.86E-267	0.316528533	0.528	0.256	1.18E-262	3	HK1
2.09E-266	0.364396661	0.254	0.088	5.08E-262	3	EFNA3
3.13E-266	0.313182857	0.28	0.101	7.62E-262	3	SYT3
7.02E-266	0.338111708	0.379	0.159	1.71E-261	3	CBLB
2.07E-265	0.387719357	0.83	0.489	5.04E-261	3	KIF5C
2.17E-265	0.441434138	0.861	0.544	5.27E-261	3	CCT6A
5.30E-265	0.337931689	0.425	0.189	1.29E-260	3	MAP1LC3A
3.57E-263	0.453028124	0.707	0.4	8.70E-259	3	STMN4
5.62E-263	0.272884135	0.162	0.042	1.37E-258	3	OPRL1
1.61E-262	0.382564553	0.424	0.194	3.91E-258	3	GTF2F2
1.89E-262	0.363677176	0.46	0.211	4.59E-258	3	PPFIA2
8.25E-261	0.398305878	0.673	0.374	2.01E-256	3	ENSMMUG00000041539
4.06E-260	0.435997368	0.915	0.652	9.88E-256	3	CELF2
1.52E-259	0.511922436	0.546	0.283	3.71E-255	3	MSMO1
1.96E-259	0.40219487	0.875	0.544	4.77E-255	3	BEX4
2.53E-259	0.353040163	0.314	0.123	6.15E-255	3	SNCA
2.71E-259	0.544466434	0.177	0.049	6.59E-255	3	CRYM
3.50E-258	0.364062119	0.621	0.326	8.51E-254	3	PRKAR2B
9.18E-258	0.48387666	0.351	0.148	2.23E-253	3	NEDD9
1.99E-255	0.433719874	0.506	0.256	4.84E-251	3	STT3B
1.34E-254	0.588831291	0.55	0.298	3.26E-250	3	ID2
4.00E-254	0.286442482	0.24	0.081	9.73E-250	3	LRCH1
7.13E-254	0.266700021	0.118	0.025	1.74E-249	3	BEND6
1.37E-253	0.40356572	0.949	0.678	3.33E-249	3	ENSMMUG00000000671
1.74E-253	0.291561434	0.516	0.252	4.23E-249	3	SLC39A3
3.80E-252	0.399768739	0.38	0.167	9.25E-248	3	SMARCD3
4.51E-250	0.250952348	0.415	0.184	1.10E-245	3	GGH
2.06E-249	0.328447725	0.369	0.157	5.00E-245	3	EPHA5
2.68E-249	0.337443343	0.263	0.096	6.52E-245	3	EMX1
8.52E-249	0.292052803	0.546	0.274	2.07E-244	3	AHDC1
1.01E-248	0.337684973	0.494	0.243	2.45E-244	3	ITSN1
2.10E-248	0.359349047	0.748	0.425	5.12E-244	3	PKIA
7.35E-248	0.347758317	0.987	0.873	1.79E-243	3	GDI1
3.96E-247	0.354877981	0.706	0.398	9.63E-243	3	UBE2K
3.70E-246	0.331566625	0.284	0.109	9.00E-242	3	NDUFAF2
2.13E-245	0.387439305	0.96	0.751	5.18E-241	3	KIDINS220
2.36E-245	0.318051098	0.215	0.07	5.74E-241	3	SCN2A
4.96E-245	0.386010552	0.849	0.533	1.21E-240	3	FAM107B
7.53E-245	0.32315707	0.672	0.369	1.83E-240	3	NCKAP1
7.33E-244	0.303077508	0.386	0.171	1.78E-239	3	CHST10
7.80E-243	0.333204618	0.275	0.104	1.90E-238	3	AUTS2
1.06E-241	0.303082571	0.362	0.156	2.59E-237	3	PPP2R5B
2.40E-241	0.289136835	0.302	0.119	5.83E-237	3	ARG2
5.96E-240	0.257261948	0.207	0.066	1.45E-235	3	VLDLR
5.56E-239	0.296867866	0.597	0.313	1.35E-234	3	IGFBP2
5.59E-239	0.359352549	0.279	0.108	1.36E-234	3	ACSL4
7.84E-239	0.286440282	0.436	0.202	1.91E-234	3	ENSMMUG00000023290
8.60E-239	0.268617679	0.277	0.104	2.09E-234	3	TMEM130
1.04E-238	0.332291274	0.437	0.206	2.54E-234	3	TUB
1.19E-238	0.298274358	0.244	0.086	2.89E-234	3	CBLN1
8.87E-238	0.254838098	0.499	0.242	2.16E-233	3	GRIA3
1.02E-237	0.291682605	0.609	0.32	2.49E-233	3	TUSC3
1.26E-237	0.368365002	0.881	0.576	3.07E-233	3	TCEAL4
1.52E-237	0.276352279	0.35	0.147	3.70E-233	3	CSRNP3
1.82E-237	0.396893711	0.944	0.728	4.42E-233	3	CSDE1
7.00E-237	0.343334843	0.708	0.411	1.70E-232	3	CDK19
1.08E-236	0.287166908	0.995	0.935	2.63E-232	3	YWHAE
2.01E-236	0.268180042	0.349	0.147	4.89E-232	3	JUP
2.74E-236	0.268701947	0.148	0.039	6.66E-232	3	AHNAK2
3.37E-236	0.262498107	0.324	0.133	8.20E-232	3	ELOVL4
1.56E-235	0.348586052	0.727	0.415	3.80E-231	3	KIF1A
3.14E-234	0.316618057	0.619	0.336	7.64E-230	3	PFDN2
4.74E-233	0.422314524	0.391	0.182	1.15E-228	3	DHCR24
7.38E-233	0.286118448	0.36	0.157	1.80E-228	3	KIF3B
8.80E-232	0.533923489	0.364	0.166	2.14E-227	3	PID1
1.35E-231	0.311431507	0.389	0.177	3.29E-227	3	GNAZ
5.23E-230	0.269967222	0.617	0.333	1.27E-225	3	VTA1
8.58E-230	0.287755323	0.654	0.359	2.09E-225	3	ENSMMUG00000041595
1.74E-228	0.250225746	0.254	0.093	4.23E-224	3	DNM3
1.02E-227	0.281546642	0.252	0.094	2.49E-223	3	RAB15
2.55E-227	0.26691317	0.375	0.166	6.20E-223	3	TLCD3B
1.12E-226	0.362591457	0.412	0.196	2.72E-222	3	DYRK2
1.42E-226	0.34158641	0.977	0.855	3.46E-222	3	NUDT3
2.20E-226	0.324703219	0.361	0.16	5.36E-222	3	TMEM108
2.91E-225	0.343511375	0.65	0.364	7.07E-221	3	CYB5B
4.10E-224	0.465313006	0.484	0.252	9.98E-220	3	GNG3
1.87E-223	0.254721131	0.303	0.124	4.54E-219	3	LHFPL6
3.43E-223	0.285748801	0.314	0.132	8.34E-219	3	CLTB
3.60E-223	0.311780724	0.678	0.386	8.77E-219	3	PEBP1
8.08E-223	0.300709728	0.357	0.158	1.97E-218	3	ENSMMUG00000020930
1.62E-222	0.277663949	0.45	0.218	3.95E-218	3	PRKX
4.54E-222	0.419984169	0.216	0.077	1.10E-217	3	MLF1
1.30E-221	0.285329507	0.329	0.14	3.16E-217	3	CCSAP
1.86E-221	0.384107649	0.864	0.574	4.52E-217	3	PTP4A1
4.83E-221	0.257524024	0.146	0.039	1.18E-216	3	HIVEP2
5.29E-221	0.269623716	0.454	0.221	1.29E-216	3	ARHGEF9
1.41E-220	0.260109536	0.495	0.248	3.43E-216	3	TCEAL2
2.16E-220	0.264976797	0.662	0.361	5.26E-216	3	ANK2
5.22E-220	0.258267619	0.555	0.287	1.27E-215	3	BLCAP
6.89E-220	0.320268885	0.508	0.265	1.68E-215	3	ESD
1.02E-219	0.271735142	0.551	0.287	2.49E-215	3	BCL7A
1.18E-219	0.304966657	0.593	0.321	2.87E-215	3	PSMD14
1.67E-219	0.323010092	0.283	0.115	4.06E-215	3	PRKAG2
4.35E-218	0.355222442	0.312	0.134	1.06E-213	3	C10H20orf27
9.99E-218	0.344990961	0.973	0.786	2.43E-213	3	APP
1.98E-216	0.266228031	0.2	0.067	4.81E-212	3	PTPRN
7.88E-216	0.358880552	0.215	0.076	1.92E-211	3	RGS7
1.20E-215	0.26464617	0.429	0.206	2.92E-211	3	ATP1A1
5.45E-214	0.466316303	0.879	0.585	1.33E-209	3	TSC22D1
7.41E-214	0.315122811	0.394	0.187	1.80E-209	3	VTI1B
4.34E-212	0.283903976	0.652	0.369	1.06E-207	3	ATP6V1FNB
5.55E-212	0.293159449	0.248	0.095	1.35E-207	3	ZBTB38
2.46E-211	0.289059984	0.462	0.232	5.98E-207	3	AMD1
1.19E-209	0.304824956	0.381	0.18	2.89E-205	3	RFK
3.29E-209	0.294296448	0.185	0.061	8.01E-205	3	PLXDC2
4.69E-209	0.335713929	0.952	0.708	1.14E-204	3	C4H6orf136
9.89E-209	0.306932448	0.987	0.882	2.41E-204	3	JPT1
1.09E-208	0.256841592	0.24	0.09	2.65E-204	3	RAB9B
7.56E-208	0.440031874	0.649	0.386	1.84E-203	3	DNER
1.46E-207	0.290815016	0.478	0.245	3.55E-203	3	DTD1
1.79E-207	0.41654393	0.342	0.159	4.35E-203	3	ENSMMUG00000012843
1.90E-207	0.330553958	0.816	0.518	4.62E-203	3	TOMM20
5.57E-207	0.34340317	0.594	0.332	1.36E-202	3	RPL26
1.23E-206	0.318331062	0.168	0.052	3.00E-202	3	PTPRE
2.41E-206	0.267519558	0.162	0.049	5.87E-202	3	TSPAN18
2.69E-206	0.306805201	0.335	0.15	6.54E-202	3	AIG1
3.70E-206	0.25034321	0.45	0.225	9.00E-202	3	TAF9
8.31E-206	0.259007586	0.575	0.312	2.02E-201	3	ACTR1A
9.14E-206	0.600411081	0.377	0.188	2.22E-201	3	DOK5
3.33E-205	0.264038726	0.519	0.271	8.10E-201	3	NAP1L5
3.54E-205	0.269488532	0.365	0.169	8.62E-201	3	EFNB2
6.84E-205	0.251103776	0.22	0.08	1.66E-200	3	JAG2
2.38E-204	0.255287092	0.195	0.067	5.79E-200	3	ENSMMUG00000049921
2.39E-204	0.350275439	0.357	0.165	5.83E-200	3	LDLRAD4
1.48E-203	0.302223376	0.216	0.08	3.59E-199	3	HEBP2
7.95E-203	0.371312673	0.279	0.117	1.94E-198	3	SH3GL3
8.59E-203	0.37257205	0.683	0.402	2.09E-198	3	KRIT1
1.49E-202	0.301883076	0.791	0.494	3.64E-198	3	GRB2
2.05E-201	0.343990196	0.821	0.52	4.99E-197	3	HINT1
2.31E-201	0.351248437	0.667	0.392	5.61E-197	3	EEF1G
4.23E-201	0.268436002	0.529	0.283	1.03E-196	3	PRDX5
5.87E-201	0.251233429	0.447	0.223	1.43E-196	3	ENSMMUG00000047370
1.15E-200	0.285613459	0.416	0.206	2.81E-196	3	FARSB
1.28E-200	0.268646087	0.558	0.303	3.12E-196	3	KIF21A
2.71E-200	0.271900086	0.825	0.513	6.58E-196	3	KIF21B
6.47E-200	0.258472081	0.183	0.061	1.57E-195	3	PRELID3A
1.10E-199	0.323633592	0.262	0.107	2.66E-195	3	RRAS2
4.36E-198	0.305069111	0.437	0.221	1.06E-193	3	PLXNA1
1.41E-197	0.303609134	0.809	0.509	3.43E-193	3	TCP1
1.46E-197	0.262779336	0.464	0.238	3.55E-193	3	NHP2
3.79E-197	0.288118233	0.331	0.151	9.23E-193	3	ACBD6
1.42E-196	0.330594375	0.222	0.084	3.46E-192	3	LRATD1
1.94E-196	0.257734904	0.427	0.213	4.73E-192	3	GARS1
1.43E-195	0.30520012	0.707	0.426	3.47E-191	3	CCT3
2.05E-195	0.288166643	0.519	0.279	4.98E-191	3	AP1S1
2.48E-194	0.301982803	0.445	0.229	6.04E-190	3	FBLN1
3.40E-194	0.275116064	0.329	0.149	8.28E-190	3	NDEL1
5.27E-194	0.280845365	0.735	0.444	1.28E-189	3	PPP2R1A
5.92E-194	0.258631574	0.177	0.059	1.44E-189	3	ABHD6
1.51E-193	0.253036099	0.306	0.133	3.67E-189	3	RETREG1
1.38E-192	0.272614451	0.281	0.119	3.36E-188	3	ENSMMUG00000050591
4.60E-192	0.297003127	0.828	0.53	1.12E-187	3	DSTN
1.62E-191	0.253829505	0.236	0.092	3.94E-187	3	SLC7A6
3.55E-191	0.292674466	0.801	0.51	8.65E-187	3	PAFAH1B2
5.51E-191	0.321013298	0.544	0.303	1.34E-186	3	ATP2B1
6.11E-191	0.258686596	0.342	0.159	1.49E-186	3	GTF3A
9.34E-191	0.545416777	0.309	0.142	2.27E-186	3	CNTNAP2
1.01E-190	0.255740094	0.274	0.115	2.46E-186	3	BAIAP2
1.08E-190	0.297765462	0.18	0.061	2.63E-186	3	TDRD7
1.67E-190	0.271947132	0.541	0.296	4.06E-186	3	EIF4A1
1.83E-189	0.405055318	0.228	0.09	4.45E-185	3	MPP6
2.75E-189	0.280717622	0.66	0.385	6.68E-185	3	EIF3E
2.97E-189	0.340207479	0.217	0.082	7.23E-185	3	KCNK2
8.05E-189	0.271263585	0.328	0.15	1.96E-184	3	SPIRE1
1.43E-188	0.255287729	0.342	0.159	3.47E-184	3	MCTS1
1.69E-188	0.269909703	0.254	0.104	4.10E-184	3	NSMF
3.15E-187	0.296411788	0.163	0.053	7.67E-183	3	CDH4
3.54E-187	0.286252565	0.687	0.407	8.62E-183	3	TBCB
3.30E-185	0.273436968	0.29	0.128	8.02E-181	3	SRPRB
8.22E-185	0.314673187	0.793	0.499	2.00E-180	3	TPM3
2.91E-184	0.272549158	0.596	0.341	7.08E-180	3	CYB5R3
6.21E-184	0.254544084	0.506	0.274	1.51E-179	3	GOT2
6.78E-184	0.323584026	0.227	0.09	1.65E-179	3	SLC41A1
1.56E-183	0.278072045	0.728	0.448	3.80E-179	3	ZMAT2
6.46E-183	0.392900031	0.309	0.143	1.57E-178	3	POU3F2
1.68E-182	0.252118436	0.627	0.364	4.08E-178	3	EIF3D
8.03E-182	0.331886095	0.815	0.541	1.95E-177	3	GNB1
1.58E-179	0.250361051	0.682	0.407	3.86E-175	3	RAB11A
2.15E-179	0.28758106	0.41	0.21	5.24E-175	3	MTCH2
1.67E-178	0.314203101	0.975	0.83	4.06E-174	3	EIF4A2
1.68E-178	0.293365574	0.306	0.14	4.09E-174	3	ENSMMUG00000049824
5.37E-177	0.277681033	0.753	0.459	1.31E-172	3	MSANTD3.TMEFF1
1.32E-176	0.262797202	0.576	0.327	3.20E-172	3	ACLY
3.09E-175	0.322218414	0.9	0.64	7.51E-171	3	CCT2
9.51E-175	0.677625543	0.644	0.442	2.32E-170	3	NFIA
1.71E-174	0.32685579	0.755	0.468	4.16E-170	3	ENSMMUG00000001210
1.82E-172	0.276782504	0.29	0.131	4.43E-168	3	MAP6
2.62E-172	0.255231931	0.546	0.306	6.38E-168	3	CETN2
2.48E-171	0.363837751	0.269	0.121	6.03E-167	3	ENSMMUG00000023144
3.84E-170	0.264652656	0.751	0.463	9.35E-166	3	CCT4
6.88E-170	0.330119171	0.906	0.64	1.68E-165	3	CALM3
4.11E-169	0.330692889	0.928	0.693	1.00E-164	3	RPL15
9.80E-169	0.295516603	0.333	0.162	2.38E-164	3	IRS1
4.29E-168	0.2609624	0.977	0.811	1.04E-163	3	CEP170
3.73E-167	0.266573035	0.243	0.103	9.08E-163	3	ENSMMUG00000063645
3.73E-167	0.30737654	0.946	0.732	9.08E-163	3	CDC42
1.56E-166	0.274136526	0.953	0.716	3.79E-162	3	ELAVL3
1.18E-162	0.259034207	0.926	0.623	2.87E-158	3	NSG1
1.93E-162	0.265206282	0.295	0.138	4.70E-158	3	CHST2
3.05E-161	0.475702855	0.187	0.072	7.42E-157	3	BCL6
4.62E-158	0.321257327	0.363	0.187	1.12E-153	3	ENSMMUG00000019570
5.38E-157	0.256470057	0.265	0.119	1.31E-152	3	SYBU
8.84E-157	0.306031416	0.832	0.562	2.15E-152	3	RPS4X
9.22E-157	0.266488708	0.216	0.09	2.24E-152	3	GLRB
3.59E-156	0.266182611	0.787	0.512	8.74E-152	3	CCT8
4.92E-155	0.267971994	0.305	0.147	1.20E-150	3	GNG12
1.83E-152	0.264029245	0.134	0.043	4.45E-148	3	INHBA
9.60E-152	0.329302525	0.898	0.652	2.34E-147	3	RACK1
2.26E-150	0.322825058	0.947	0.741	5.49E-146	3	RPL10A
2.31E-148	0.256455826	0.286	0.136	5.61E-144	3	ENSMMUG00000056624
3.34E-148	0.252027973	0.269	0.126	8.13E-144	3	GPD2
1.48E-147	0.252816797	0.896	0.619	3.60E-143	3	NDFIP1
3.19E-147	0.253804166	0.731	0.453	7.77E-143	3	RPS2
7.12E-146	0.256058201	0.771	0.498	1.73E-141	3	CS
8.78E-144	0.311618612	0.265	0.126	2.14E-139	3	DHCR7
8.82E-142	0.284152601	0.271	0.129	2.15E-137	3	EDIL3
4.91E-140	0.258349774	0.277	0.133	1.20E-135	3	EIF4E3
1.98E-139	0.302226686	0.921	0.665	4.83E-135	3	GAPDH
4.67E-139	0.253410095	0.305	0.153	1.14E-134	3	FHOD3
6.80E-139	0.287386962	0.271	0.132	1.66E-134	3	ADGRL2
3.14E-137	0.319938476	0.148	0.054	7.65E-133	3	ENSMMUG00000054125
3.02E-136	0.264910409	0.872	0.615	7.35E-132	3	CSNK1A1
9.18E-136	0.278681922	0.903	0.657	2.23E-131	3	RPL4
1.11E-134	0.268758371	0.897	0.648	2.70E-130	3	COX7C
6.54E-127	0.279627988	0.884	0.644	1.59E-122	3	RPS17
8.22E-125	0.289795387	0.184	0.08	2.00E-120	3	SNX7
2.50E-121	0.255226822	0.846	0.584	6.08E-117	3	RPL7
5.76E-121	0.262021985	0.198	0.089	1.40E-116	3	MVD
1.24E-116	0.266676733	0.956	0.767	3.01E-112	3	RPS3
4.84E-113	0.258563036	0.949	0.763	1.18E-108	3	RPL9
2.42E-110	0.268132844	0.943	0.739	5.88E-106	3	RPL5
2.12E-92	0.387013824	0.288	0.167	5.15E-88	3	ENSMMUG00000062648
1.08E-80	0.384059098	0.133	0.06	2.64E-76	3	DIRAS3
0	2.397404232	0.997	0.446	0	4	ENSMMUG00000055860
0	2.276335947	0.666	0.321	0	4	TOX3
0	2.080021091	0.844	0.479	0	4	RND3
0	1.748789435	0.554	0.272	0	4	ARL4D
0	1.744898589	0.813	0.463	0	4	DCLK2
0	1.706719856	0.307	0.073	0	4	ENSMMUG00000058315
0	1.662087453	0.607	0.234	0	4	DLX5
0	1.65427948	0.813	0.328	0	4	DLX1
0	1.652743287	0.8	0.58	0	4	BTG1
0	1.643873185	0.575	0.294	0	4	TMEM123
0	1.427007455	0.581	0.227	0	4	SP9
0	1.33552775	0.588	0.248	0	4	DLX2
0	1.280803617	0.905	0.78	0	4	CCDC88A
0	1.148620112	0.853	0.737	0	4	ENSMMUG00000051392
4.28E-281	1.068805687	0.825	0.769	1.04E-276	4	ENSMMUG00000049324
2.70E-247	1.233718039	0.5	0.239	6.58E-243	4	GAD2
3.12E-225	1.279928523	0.685	0.517	7.59E-221	4	TIGAR
1.39E-211	1.349199749	0.415	0.194	3.38E-207	4	GAS2L3
1.19E-203	0.558889866	0.97	0.968	2.90E-199	4	ENSMMUG00000061824
8.56E-171	1.545947601	0.413	0.235	2.08E-166	4	FAM210B
3.37E-170	0.93020673	0.728	0.654	8.20E-166	4	SOX4
9.33E-168	1.056644252	0.552	0.344	2.27E-163	4	ENSMMUG00000052013
9.81E-140	0.930005813	0.108	0.025	2.39E-135	4	ACVR1C
2.47E-130	0.506072805	0.933	0.931	6.00E-126	4	ENSMMUG00000065362
2.14E-122	1.081104012	0.651	0.586	5.22E-118	4	SHTN1
3.34E-116	1.286662971	0.219	0.093	8.12E-112	4	ETV1
1.97E-108	1.178874635	0.498	0.38	4.80E-104	4	CPLX2
1.21E-105	1.190437814	0.244	0.116	2.94E-101	4	ENSMMUG00000063549
1.47E-105	1.164148198	0.269	0.134	3.58E-101	4	SLC10A4
1.71E-99	0.85100988	0.361	0.202	4.16E-95	4	GAD1
9.02E-99	0.980988379	0.457	0.314	2.20E-94	4	SLAIN1
2.66E-97	1.123714379	0.556	0.497	6.47E-93	4	KAT6B
1.05E-90	1.170563369	0.17	0.071	2.54E-86	4	PPFIBP1
3.49E-90	0.402881655	0.932	0.902	8.50E-86	4	MAP1B
6.93E-87	0.878049712	0.215	0.099	1.69E-82	4	PDZRN3
1.45E-85	1.093870078	0.348	0.22	3.52E-81	4	CEMIP2
4.71E-84	1.230053964	0.238	0.126	1.15E-79	4	KLHDC8A
2.92E-79	1.059500841	0.162	0.071	7.10E-75	4	FLRT2
7.18E-79	0.435708092	0.889	0.897	1.75E-74	4	RTN4
3.68E-77	0.311865729	0.978	0.977	8.96E-73	4	ENSMMUG00000060590
1.07E-76	1.204861584	0.239	0.131	2.59E-72	4	ACVR1
8.77E-74	0.874371262	0.142	0.058	2.13E-69	4	AKNA
8.62E-69	1.101973707	0.287	0.18	2.10E-64	4	ENOX1
5.34E-66	0.897265815	0.464	0.364	1.30E-61	4	CELF4
2.10E-61	1.21165074	0.292	0.19	5.12E-57	4	PAX6
2.08E-57	0.288840132	0.937	0.853	5.06E-53	4	STMN2
6.54E-52	0.936179212	0.492	0.45	1.59E-47	4	ATP1B1
2.00E-48	0.371945708	0.833	0.844	4.87E-44	4	TUBB3
2.81E-47	1.007714582	0.18	0.103	6.83E-43	4	PCDH9
7.86E-47	0.978041774	0.393	0.323	1.91E-42	4	CHD7
8.50E-43	0.689165794	0.582	0.601	2.07E-38	4	TCF4
5.87E-41	0.341447005	0.797	0.757	1.43E-36	4	INA
9.62E-39	0.696284398	0.193	0.117	2.34E-34	4	DCN
3.00E-34	0.58891718	0.578	0.577	7.31E-30	4	ZEB2
1.48E-33	0.401623444	0.705	0.79	3.60E-29	4	DBN1
6.45E-33	0.669508087	0.1	0.05	1.57E-28	4	ROR2
1.63E-32	0.515609787	0.238	0.156	3.96E-28	4	SLC32A1
7.88E-31	0.693336028	0.525	0.53	1.92E-26	4	DST
3.01E-29	0.882782836	0.341	0.29	7.33E-25	4	DCLK1
1.41E-27	0.507558995	0.649	0.734	3.43E-23	4	KIF2A
1.35E-25	0.387651477	0.784	0.839	3.29E-21	4	ATP6
3.58E-25	0.562667876	0.493	0.458	8.72E-21	4	NFIA
2.13E-24	0.607267711	0.302	0.236	5.19E-20	4	SLC6A1
1.86E-23	0.350803148	0.318	0.251	4.53E-19	4	PBX3
3.33E-23	0.900115336	0.115	0.07	8.11E-19	4	IPO11
5.73E-22	0.630046057	0.114	0.069	1.39E-17	4	TIAM2
1.30E-21	0.883309725	0.173	0.124	3.16E-17	4	SERINC5
3.66E-21	0.295230939	0.169	0.287	8.92E-17	4	FAM171B
6.62E-20	0.942453731	0.215	0.169	1.61E-15	4	PELI2
1.20E-19	0.633614558	0.179	0.128	2.92E-15	4	MOB3B
3.64E-19	0.550368313	0.572	0.625	8.85E-15	4	ENSMMUG00000064551
5.99E-19	0.604796584	0.526	0.542	1.46E-14	4	SYNE2
1.92E-18	0.647119379	0.513	0.568	4.67E-14	4	CTNNB1
5.47E-18	0.263067365	0.201	0.323	1.33E-13	4	USP48
1.53E-17	0.254073698	0.164	0.266	3.72E-13	4	TRIM23
1.95E-16	0.281959362	0.195	0.306	4.74E-12	4	JMJD1C
1.57E-15	0.263576372	0.187	0.293	3.83E-11	4	SPECC1L
2.47E-15	0.404082854	0.662	0.763	6.00E-11	4	WSB1
2.50E-15	0.340347957	0.66	0.74	6.08E-11	4	ELAVL3
4.83E-15	0.2591529	0.199	0.307	1.17E-10	4	KCTD20
9.00E-15	0.691503308	0.418	0.432	2.19E-10	4	TCF12
1.47E-14	0.255603784	0.156	0.248	3.58E-10	4	FMR1
1.88E-14	0.280020484	0.158	0.249	4.58E-10	4	CSNK1G3
2.07E-14	0.423408864	0.662	0.745	5.03E-10	4	ENSMMUG00000052424
2.27E-14	0.265854678	0.239	0.364	5.52E-10	4	VTA1
2.44E-14	0.282637145	0.216	0.33	5.93E-10	4	RO60
2.58E-14	0.284457568	0.203	0.314	6.27E-10	4	PALM
5.29E-14	0.267410051	0.275	0.409	1.29E-09	4	KMT2C
7.08E-14	0.254448237	0.235	0.357	1.72E-09	4	YEATS2
1.37E-13	0.275978385	0.166	0.256	3.33E-09	4	STAG1
1.97E-13	0.309279712	0.657	0.771	4.79E-09	4	DYNC1I2
2.10E-13	0.285041284	0.207	0.313	5.11E-09	4	BRWD1
4.81E-13	0.307845603	0.174	0.267	1.17E-08	4	PHF20
1.06E-12	0.66105513	0.174	0.136	2.59E-08	4	SALL1
1.11E-12	0.25868706	0.161	0.246	2.70E-08	4	LIMD2
1.15E-12	0.250968492	0.208	0.311	2.80E-08	4	CBX4
1.56E-12	0.296288281	0.247	0.364	3.80E-08	4	GOLGB1
1.77E-12	0.757299453	0.275	0.256	4.31E-08	4	GSE1
2.84E-12	0.265965006	0.264	0.395	6.92E-08	4	ND1
7.23E-12	0.653221782	0.18	0.145	1.76E-07	4	CDCA7
7.55E-12	0.297279846	0.197	0.294	1.84E-07	4	RNF40
1.31E-11	0.310880136	0.193	0.29	3.20E-07	4	CTDSP2
2.19E-11	0.283340987	0.144	0.22	5.33E-07	4	GSTM3
2.38E-11	0.380779055	0.221	0.328	5.80E-07	4	FNBP4
2.76E-11	0.251385333	0.128	0.197	6.72E-07	4	MYO9A
4.76E-11	0.302281927	0.195	0.288	1.16E-06	4	IP6K2
5.18E-11	0.726458327	0.264	0.241	1.26E-06	4	LITAF
5.41E-11	0.27042671	0.174	0.257	1.32E-06	4	EPC1
8.03E-11	0.296167443	0.262	0.383	1.95E-06	4	DMTF1
8.64E-11	0.28647636	0.291	0.429	2.10E-06	4	RNF103
1.29E-10	0.302765173	0.144	0.218	3.15E-06	4	BROX
1.36E-10	0.773990909	0.235	0.211	3.31E-06	4	GPCPD1
1.36E-10	0.29047651	0.173	0.255	3.32E-06	4	KDM5A
1.65E-10	0.517387167	0.555	0.643	4.02E-06	4	H1.0
1.86E-10	0.320150974	0.169	0.252	4.54E-06	4	CDC42SE2
2.27E-10	0.261040687	0.11	0.169	5.52E-06	4	PMEPA1
3.75E-10	0.684788315	0.362	0.369	9.11E-06	4	AMOTL2
4.09E-10	0.309973746	0.153	0.228	9.95E-06	4	ENSMMUG00000037977
4.20E-10	0.317754556	0.224	0.325	1.02E-05	4	DUSP18
5.01E-10	0.308876927	0.161	0.237	1.22E-05	4	PDP1
5.52E-10	0.639398213	0.431	0.482	1.34E-05	4	CDH2
7.00E-10	0.567510763	0.449	0.494	1.70E-05	4	CORO2B
8.27E-10	0.697345088	0.359	0.376	2.01E-05	4	KLF7
8.39E-10	0.418903955	0.539	0.62	2.04E-05	4	KIAA0408
1.08E-09	0.680500121	0.372	0.392	2.63E-05	4	ARRDC3
1.12E-09	0.254822694	0.174	0.252	2.73E-05	4	LCOR
1.15E-09	0.329679611	0.157	0.232	2.80E-05	4	IFT88
1.17E-09	0.274744686	0.079	0.127	2.86E-05	4	SLC12A6
1.22E-09	0.317862144	0.151	0.221	2.97E-05	4	RASA2
2.53E-09	0.683855312	0.22	0.197	6.16E-05	4	NAV3
2.61E-09	0.30234738	0.145	0.213	6.36E-05	4	GPSM1
3.26E-09	0.278796993	0.146	0.213	7.92E-05	4	ERBIN
3.74E-09	0.342258986	0.26	0.374	9.10E-05	4	MPPED2
3.84E-09	0.264769205	0.154	0.223	9.33E-05	4	ENSMMUG00000022140
4.01E-09	0.557575718	0.15	0.121	9.77E-05	4	APCDD1
4.83E-09	0.325858979	0.191	0.275	0.000117545	4	ITFG2
5.65E-09	0.295004777	0.264	0.378	0.000137406	4	ENSMMUG00000059486
9.13E-09	0.261621817	0.182	0.26	0.000222247	4	ENSMMUG00000010611
9.75E-09	0.313247017	0.298	0.428	0.00023717	4	MTSS2
1.05E-08	0.295269776	0.295	0.419	0.00025453	4	SF3A2
1.37E-08	0.333202153	0.118	0.175	0.000332575	4	SPSB3
1.51E-08	0.638554981	0.108	0.083	0.000367267	4	MXRA8
2.68E-08	0.359734291	0.617	0.748	0.000651583	4	SON
2.78E-08	0.275574012	0.349	0.498	0.000676256	4	ZNF638
2.81E-08	0.338079236	0.231	0.328	0.00068323	4	ELF2
3.23E-08	0.265186461	0.382	0.543	0.000786127	4	KMT5B
3.53E-08	0.330940666	0.157	0.223	0.000860019	4	RBM33
3.67E-08	0.663066685	0.393	0.434	0.000892223	4	TPGS2
4.48E-08	0.325164331	0.605	0.717	0.001089201	4	TCAF1
5.44E-08	0.344618799	0.118	0.173	0.001324266	4	STX2
6.91E-08	0.323421602	0.15	0.214	0.001682229	4	CTNNA1
8.07E-08	0.292177387	0.129	0.186	0.001963642	4	CASP2
8.48E-08	0.582489155	0.207	0.185	0.002063748	4	MYT1
8.68E-08	0.336593237	0.127	0.184	0.002111807	4	CD59
9.24E-08	0.309665461	0.193	0.271	0.002247232	4	NBR1
9.45E-08	0.254603371	0.121	0.174	0.002299251	4	MINDY2
1.15E-07	0.258914595	0.091	0.136	0.002791268	4	ARL6IP6
1.34E-07	0.35041141	0.119	0.172	0.003266508	4	ERICH1
1.40E-07	0.275193557	0.348	0.491	0.003410756	4	SEPTIN11
1.52E-07	0.4705695	0.133	0.107	0.003698227	4	SMOC1
1.52E-07	0.326535316	0.23	0.32	0.003706753	4	ZNF195
2.11E-07	0.306008644	0.121	0.174	0.005144535	4	FGFR1OP2
2.13E-07	0.299253242	0.126	0.179	0.005172966	4	RGS12
2.20E-07	0.359065408	0.199	0.278	0.005360973	4	CHD2
2.30E-07	0.532774441	0.495	0.589	0.005606564	4	OGA
3.43E-07	0.277670293	0.192	0.266	0.008343217	4	PELI1
3.58E-07	0.282413215	0.384	0.535	0.008717829	4	SPEN
3.61E-07	0.256378829	0.38	0.541	0.00879027	4	ARID1A
4.29E-07	0.365618233	0.271	0.378	0.010429604	4	GIGYF1
4.52E-07	0.271815702	0.137	0.191	0.010993108	4	WBP4
5.90E-07	0.289885452	0.382	0.54	0.014366428	4	NSD3
6.46E-07	0.448891721	0.215	0.191	0.01570898	4	RBP1
7.78E-07	0.275659012	0.107	0.153	0.01892101	4	SEMA4B
7.79E-07	0.343244694	0.204	0.28	0.018945018	4	SYF2
8.71E-07	0.288875727	0.246	0.34	0.0211988	4	ZNF711
8.80E-07	0.488513393	0.145	0.12	0.021416975	4	ELMO1
9.01E-07	0.386536497	0.203	0.282	0.021922623	4	MAD2L2
9.59E-07	0.27534119	0.121	0.17	0.023335123	4	CILK1
9.88E-07	0.26026294	0.093	0.134	0.024047622	4	ENSMMUG00000050172
1.01E-06	0.378080434	0.357	0.51	0.024503214	4	YPEL3
1.19E-06	0.294451823	0.159	0.22	0.028925912	4	CHD6
1.30E-06	0.568249687	0.411	0.463	0.031668312	4	MXI1
1.49E-06	0.275577029	0.345	0.48	0.03625372	4	PBRM1
1.65E-06	0.395865646	0.26	0.355	0.040073029	4	BAZ2B
1.68E-06	0.343006011	0.139	0.195	0.040970581	4	BICD2
1.80E-06	0.373269449	0.284	0.395	0.043920883	4	TRIM24
2.26E-06	0.354563939	0.182	0.249	0.055101379	4	LMBR1L
2.54E-06	0.306936005	0.12	0.167	0.061794734	4	ZBED1
2.81E-06	0.314696312	0.217	0.296	0.068496835	4	AGO1
3.28E-06	0.33884873	0.338	0.472	0.079716248	4	YTHDC1
3.38E-06	0.325626077	0.284	0.393	0.08217871	4	ZSCAN18
4.52E-06	0.259974318	0.109	0.152	0.109962896	4	BCL10
4.81E-06	0.498998847	0.51	0.61	0.116956348	4	ARID4B
5.63E-06	0.365293968	0.176	0.241	0.137034887	4	TRIM13
5.70E-06	0.291641198	0.115	0.159	0.138608875	4	TBCC
6.45E-06	0.253162763	0.381	0.531	0.156850089	4	HTATSF1
6.96E-06	0.326619665	0.359	0.496	0.169342952	4	ZC2HC1A
9.48E-06	0.263549246	0.116	0.16	0.230707764	4	VAV2
1.02E-05	0.603419788	0.236	0.229	0.24880124	4	DHRS7
1.03E-05	0.446627787	0.206	0.186	0.249451042	4	ID4
1.14E-05	0.326161122	0.14	0.19	0.278552168	4	LRCH3
1.20E-05	0.272369228	0.119	0.163	0.291538482	4	ARNT
1.20E-05	0.280757146	0.378	0.522	0.292048262	4	ENSMMUG00000005482
1.24E-05	0.62295485	0.187	0.171	0.301941976	4	ST8SIA4
1.24E-05	0.318817931	0.163	0.219	0.30194364	4	ZEB1
1.29E-05	0.257434247	0.077	0.11	0.314013724	4	MAP3K3
1.30E-05	0.797816799	0.275	0.285	0.315227949	4	RASSF2
1.36E-05	0.274256912	0.347	0.467	0.330426131	4	PHIP
1.47E-05	0.269249349	0.108	0.148	0.358520901	4	CBX8
1.62E-05	0.615434455	0.371	0.411	0.393558574	4	ENSMMUG00000053163
1.99E-05	0.256710871	0.085	0.119	0.483311021	4	ARMH4
2.13E-05	0.378562608	0.312	0.422	0.518387748	4	BOD1L1
2.33E-05	0.336886862	0.377	0.531	0.566121039	4	PUM1
5.14E-05	0.334407021	0.595	0.702	1	4	AKAP9
6.29E-05	0.730577747	0.185	0.177	1	4	ANKS1B
6.99E-05	0.372562717	0.22	0.292	1	4	PAK3
9.04E-05	0.412181464	0.207	0.276	1	4	PCMTD1
0.00011934	0.281490792	0.111	0.148	1	4	ENSMMUG00000059829
0.000131142	0.44827675	0.26	0.353	1	4	GOLM1
0.000136306	0.359954484	0.296	0.402	1	4	MKRN1
0.000145769	0.502892339	0.123	0.107	1	4	ZNF704
0.000148019	0.310987007	0.367	0.498	1	4	CCNG2
0.000183242	0.321662981	0.405	0.566	1	4	Metazoa-SRP
0.000269559	0.531163199	0.107	0.092	1	4	CDKAL1
0.000291114	0.386458883	0.256	0.338	1	4	PTBP3
0.00032266	0.41462151	0.31	0.418	1	4	SLC39A6
0.000368809	0.290499717	0.39	0.535	1	4	KDM1A
0.000377506	0.518368546	0.148	0.134	1	4	KIF26A
0.000385314	0.698787588	0.197	0.194	1	4	ROBO2
0.000508856	0.395858829	0.076	0.103	1	4	B3GALT2
0.000565502	0.3196759	0.107	0.14	1	4	USP28
0.000575046	0.351465798	0.198	0.258	1	4	ENSMMUG00000064585
0.000641087	0.605229128	0.171	0.163	1	4	RIMKLA
0.000681692	0.32107865	0.263	0.343	1	4	LBH
0.000713778	0.396577967	0.215	0.281	1	4	KIAA1841
0.001018643	0.319974401	0.092	0.12	1	4	ASAP1
0.001020026	0.429445756	0.239	0.315	1	4	NUMA1
0.001145515	0.282637168	0.077	0.102	1	4	PLEKHF2
0.001336628	0.381818231	0.219	0.282	1	4	NOL4
0.001404779	0.290772518	0.121	0.155	1	4	KDM7A
0.001567157	0.482852611	0.181	0.234	1	4	CSPP1
0.001781733	0.57179356	0.28	0.296	1	4	BIRC2
0.002370274	0.522705276	0.41	0.481	1	4	GNAI2
0.002482538	0.330831859	0.363	0.487	1	4	MAP4K4
0.002567754	0.339269852	0.296	0.384	1	4	FOXG1
0.002966346	0.36020069	0.131	0.167	1	4	GABPB1
0.003627405	0.420081229	0.289	0.379	1	4	CREB1
0.004741103	0.328049326	0.413	0.554	1	4	ZNF292
0.005160246	0.308658049	0.107	0.135	1	4	MSN
0.005341541	0.252936553	0.125	0.156	1	4	CADM1
0.006106781	0.289031549	0.419	0.553	1	4	RDX
0.006321509	0.340528658	0.177	0.221	1	4	DAPK1
0.00652582	0.607661462	0.268	0.288	1	4	ARHGEF2
0.007083163	0.375926165	0.083	0.105	1	4	SIPA1L1
0.007322085	0.290067361	0.113	0.141	1	4	DNMT3A
0.009844825	0.372806967	0.539	0.654	1	4	ANKRD12
0	3.179019736	0.84	0.225	0	5	PBX3
0	1.568848936	0.538	0.275	0	5	MEIS2
0	1.406404346	0.102	0.007	0	5	TEX15
0	0.893971843	0.836	0.455	0	5	ENSMMUG00000055860
1.69E-254	1.912114435	0.279	0.09	4.12E-250	5	ETV1
6.95E-228	0.619782738	0.98	0.967	1.69E-223	5	ENSMMUG00000061824
6.60E-212	0.636597546	0.107	0.017	1.61E-207	5	ZNF503
1.83E-210	1.064856542	0.698	0.469	4.46E-206	5	DCLK2
3.62E-186	1.401679036	0.185	0.052	8.80E-182	5	PCP4
3.68E-176	0.787979686	0.918	0.892	8.95E-172	5	ENSMMUG00000019174
1.16E-169	0.902328517	0.221	0.07	2.81E-165	5	SYNPR
6.87E-168	0.7625403	0.147	0.037	1.67E-163	5	SYT6
1.21E-161	0.652041682	0.121	0.026	2.94E-157	5	TAC3
6.26E-151	0.856807322	0.583	0.34	1.52E-146	5	DLX1
5.14E-150	0.992177809	0.441	0.235	1.25E-145	5	SP9
2.80E-137	1.172244108	0.206	0.076	6.81E-133	5	SOCS2
7.37E-128	0.666859687	0.148	0.045	1.79E-123	5	SERTAD4
1.07E-116	0.645767179	0.841	0.783	2.60E-112	5	CCDC88A
2.19E-114	0.86628068	0.196	0.076	5.32E-110	5	ZFHX3
1.72E-113	0.654437061	0.44	0.243	4.19E-109	5	DLX5
1.56E-108	0.946159649	0.418	0.263	3.79E-104	5	RUNX1T1
1.20E-104	0.459027797	0.909	0.809	2.91E-100	5	RTN1
4.45E-102	0.459992816	0.849	0.755	1.08E-97	5	INA
3.59E-100	0.46889014	0.953	0.93	8.74E-96	5	ENSMMUG00000065362
1.18E-99	0.742085087	0.529	0.36	2.88E-95	5	CELF4
1.39E-96	1.225014509	0.256	0.133	3.38E-92	5	LHFPL6
1.50E-96	0.676888389	0.181	0.071	3.65E-92	5	DLX6
1.76E-93	0.628581362	0.732	0.654	4.29E-89	5	SOX4
3.00E-92	1.045587431	0.196	0.087	7.30E-88	5	PLXNC1
1.64E-88	0.961732477	0.342	0.198	3.98E-84	5	GAS2L3
9.43E-84	0.647956964	0.737	0.695	2.29E-79	5	AKAP9
7.75E-83	0.871327274	0.675	0.586	1.89E-78	5	BTG1
4.78E-74	0.599397183	0.151	0.062	1.16E-69	5	MEIS1
1.51E-69	0.403123203	0.836	0.831	3.67E-65	5	FNBP1L
5.82E-69	0.737575573	0.118	0.045	1.42E-64	5	PTPRM
4.26E-68	0.650255248	0.155	0.068	1.04E-63	5	VSTM2L
9.20E-60	1.232778252	0.236	0.138	2.24E-55	5	KCTD12
6.22E-59	0.872696794	0.334	0.229	1.51E-54	5	MEIS3
6.50E-59	0.6893738	0.574	0.493	1.58E-54	5	RND3
2.82E-58	0.259828297	0.911	0.938	6.86E-54	5	EIF4G2
2.69E-53	0.6379061	0.235	0.133	6.54E-49	5	ENSMMUG00000058478
1.33E-52	0.489850292	0.38	0.246	3.24E-48	5	GAD2
1.32E-51	0.864817604	0.209	0.118	3.21E-47	5	ENSMMUG00000063549
5.47E-50	0.645247526	0.11	0.047	1.33E-45	5	ZNF385D
7.24E-47	0.416098609	0.74	0.728	1.76E-42	5	C4H6orf136
4.29E-45	0.808204211	0.156	0.081	1.04E-40	5	ENSMMUG00000058315
3.91E-44	0.409342591	0.743	0.741	9.52E-40	5	ENSMMUG00000052424
2.88E-41	0.862390214	0.611	0.589	7.01E-37	5	SHTN1
2.30E-40	0.614510392	0.2	0.118	5.60E-36	5	ELMO1
3.48E-38	0.786150898	0.247	0.168	8.48E-34	5	DCBLD2
4.13E-38	0.359259782	0.772	0.758	1.01E-33	5	CDK5R1
9.21E-37	0.265712276	0.928	0.902	2.24E-32	5	MAP1B
1.76E-36	0.466984958	0.308	0.205	4.28E-32	5	GAD1
7.48E-36	0.360086449	0.733	0.714	1.82E-31	5	RBFOX2
9.12E-36	0.971232215	0.411	0.366	2.22E-31	5	MPPED2
2.50E-35	0.538785134	0.144	0.079	6.09E-31	5	ENSMMUG00000051684
3.97E-33	0.707965376	0.291	0.218	9.65E-29	5	CDK17
2.90E-31	0.681945076	0.346	0.277	7.05E-27	5	ENSMMUG00000054106
5.18E-31	0.558553768	0.499	0.426	1.26E-26	5	EGR1
4.70E-30	0.428708176	0.239	0.156	1.14E-25	5	SLC32A1
2.60E-29	0.759271655	0.151	0.093	6.33E-25	5	LRATD1
3.64E-28	0.595707919	0.226	0.156	8.86E-24	5	ZCCHC12
5.75E-28	0.639939517	0.357	0.287	1.40E-23	5	MTUS1
1.62E-27	0.534639771	0.421	0.351	3.94E-23	5	ENSMMUG00000052013
2.59E-26	0.429759372	0.625	0.616	6.31E-22	5	KIAA0408
5.19E-25	0.25337748	0.818	0.826	1.26E-20	5	CEP170
3.40E-24	0.584606813	0.173	0.114	8.27E-20	5	MGAT5B
6.24E-24	0.322894882	0.724	0.765	1.52E-19	5	TOP2B
3.47E-22	0.332294845	0.665	0.648	8.43E-18	5	NSG1
5.36E-22	0.643665198	0.243	0.183	1.30E-17	5	ZFHX4
6.94E-22	0.300679481	0.721	0.78	1.69E-17	5	MORF4L1
7.90E-22	0.342509917	0.114	0.067	1.92E-17	5	BCL11B
1.54E-21	0.518181756	0.269	0.206	3.76E-17	5	MYO1B
6.22E-21	0.617060855	0.253	0.195	1.51E-16	5	NAV3
3.43E-19	0.657324219	0.243	0.192	8.34E-15	5	ROBO2
2.00E-17	0.503071894	0.333	0.29	4.88E-13	5	NUP93
8.46E-17	0.460599093	0.12	0.078	2.06E-12	5	ATF5
1.47E-16	0.324912579	0.828	0.837	3.57E-12	5	ATP6
2.08E-16	0.333861151	0.101	0.063	5.06E-12	5	ZNF521
2.64E-16	0.657112509	0.111	0.073	6.43E-12	5	BEGAIN
4.15E-16	0.264279415	0.332	0.261	1.01E-11	5	DLX2
5.04E-16	0.356952731	0.552	0.539	1.23E-11	5	KIF21B
6.98E-16	0.270785018	0.731	0.771	1.70E-11	5	KIDINS220
3.55E-15	0.438576639	0.563	0.586	8.63E-11	5	OGA
4.40E-15	0.262257217	0.093	0.161	1.07E-10	5	EPB41L3
1.19E-14	0.643050065	0.227	0.183	2.90E-10	5	ENOX1
1.27E-14	0.380188524	0.579	0.562	3.09E-10	5	GRIA2
3.08E-14	0.33397127	0.668	0.713	7.49E-10	5	ATRX
3.46E-14	0.293512576	0.724	0.79	8.43E-10	5	DDX17
9.96E-14	0.637032931	0.426	0.421	2.42E-09	5	MTSS2
1.44E-13	0.704430717	0.139	0.102	3.51E-09	5	SIPA1L1
2.28E-13	0.286564482	0.67	0.73	5.55E-09	5	CBX1
4.99E-13	0.415786166	0.515	0.519	1.21E-08	5	SCAMP1
5.22E-13	0.45016447	0.461	0.442	1.27E-08	5	SH3BP5
5.71E-13	0.354634806	0.558	0.586	1.39E-08	5	CD200
9.48E-13	0.589426144	0.265	0.225	2.31E-08	5	CEMIP2
1.21E-12	0.539480375	0.39	0.374	2.95E-08	5	TNRC6C
1.38E-12	0.754751557	0.166	0.129	3.36E-08	5	KLHDC8A
4.28E-12	0.433543201	0.307	0.27	1.04E-07	5	SEPTIN6
5.85E-12	0.448782137	0.513	0.536	1.42E-07	5	KMT5B
6.55E-12	0.537086406	0.405	0.385	1.59E-07	5	CPLX2
6.92E-12	0.507055536	0.172	0.133	1.68E-07	5	KIF26A
8.40E-12	0.819138587	0.119	0.086	2.05E-07	5	CNTN2
2.20E-11	0.587569847	0.194	0.157	5.35E-07	5	DUSP4
3.74E-11	0.281183396	0.668	0.714	9.10E-07	5	PNISR
3.85E-11	0.465145886	0.521	0.543	9.37E-07	5	GNAQ
6.58E-11	0.5294563	0.39	0.382	1.60E-06	5	GABRB3
7.78E-11	0.544853273	0.145	0.111	1.89E-06	5	ITPRIP
1.61E-10	0.54130948	0.412	0.409	3.92E-06	5	ENSMMUG00000053163
4.65E-10	0.275391608	0.233	0.328	1.13E-05	5	ATP2B1
4.75E-10	0.369772775	0.145	0.111	1.16E-05	5	CHN2
1.19E-09	0.473865793	0.475	0.499	2.89E-05	5	TRIB2
1.42E-09	0.64421843	0.471	0.501	3.46E-05	5	KAT6B
1.91E-09	0.30923524	0.123	0.091	4.64E-05	5	FAM222A
1.09E-08	0.314859283	0.598	0.641	0.00026454	5	H1.0
1.99E-08	0.785745889	0.19	0.166	0.000483879	5	WRN
4.17E-08	0.434426614	0.461	0.481	0.001013729	5	CDH2
5.97E-08	0.414011063	0.348	0.339	0.00145336	5	LBH
8.70E-08	0.347374715	0.532	0.578	0.002117847	5	PAIP2
8.82E-08	0.400267702	0.336	0.32	0.002145634	5	RASAL2
1.11E-07	0.291617309	0.624	0.679	0.002695358	5	LENG8
1.53E-07	0.448555478	0.508	0.547	0.003735076	5	RSF1
3.11E-07	0.554027316	0.316	0.305	0.007575209	5	CBX4
3.63E-07	0.355596225	0.561	0.606	0.008839269	5	APC
4.27E-07	0.29918756	0.608	0.65	0.010393076	5	ANKRD12
5.56E-07	0.655499342	0.293	0.285	0.013523725	5	RASSF2
1.23E-06	0.302802483	0.566	0.619	0.029845021	5	ABI2
1.59E-06	0.325288593	0.425	0.428	0.038774263	5	ENSMMUG00000004633
3.89E-06	0.320430959	0.324	0.307	0.09469487	5	TMEM123
4.04E-06	0.510079331	0.379	0.392	0.098252702	5	ARRDC3
4.76E-06	0.473373806	0.366	0.369	0.11585994	5	AMOTL2
4.95E-06	0.535764728	0.256	0.247	0.120393443	5	TNKS
5.51E-06	0.440924272	0.111	0.089	0.134118252	5	NRP2
9.03E-06	0.333461149	0.562	0.617	0.219743234	5	ZFAND5
1.39E-05	0.535278713	0.337	0.337	0.337271807	5	GRIA1
2.02E-05	0.441755392	0.407	0.427	0.49106336	5	DLGAP4
2.56E-05	0.490649642	0.16	0.141	0.622468345	5	MTSS1
3.95E-05	0.373325014	0.297	0.29	0.96212093	5	IRS2
4.48E-05	0.412661989	0.203	0.189	1	5	EPB41
5.67E-05	0.361540753	0.419	0.436	1	5	KDM6B
7.17E-05	0.298096143	0.258	0.242	1	5	RGMA
7.21E-05	0.392119511	0.497	0.531	1	5	DST
8.53E-05	0.258794692	0.155	0.203	1	5	HBP1
8.77E-05	0.420410028	0.3	0.295	1	5	BIRC2
8.86E-05	0.500434212	0.18	0.166	1	5	PMEPA1
0.000163516	0.304068185	0.552	0.607	1	5	ARID4B
0.000229949	0.285536848	0.516	0.569	1	5	TERF2IP
0.00029295	0.272525041	0.19	0.244	1	5	ZNF148
0.000337972	0.641098519	0.417	0.453	1	5	VCAN
0.000342886	0.29587518	0.542	0.597	1	5	KMT2E
0.000594717	0.335542461	0.154	0.139	1	5	DNMT3A
0.000596385	0.41397372	0.167	0.216	1	5	PLXNB2
0.000611161	0.416722204	0.235	0.227	1	5	SIPA1L2
0.001314959	0.387652151	0.225	0.217	1	5	CHD6
0.001444794	0.260466398	0.331	0.415	1	5	PHF3
0.001965193	0.374625756	0.098	0.128	1	5	SERINC5
0.00209718	0.295033938	0.109	0.095	1	5	SGIP1
0.002623295	0.265856245	0.439	0.459	1	5	SYT5
0.002747552	0.285654865	0.138	0.124	1	5	NEGR1
0.00337068	0.255447518	0.568	0.636	1	5	TIA1
0.003418432	0.592362279	0.581	0.643	1	5	ENSMMUG00000053116
0.003486463	0.30169899	0.132	0.12	1	5	RBFOX1
0.004086802	0.388431154	0.199	0.193	1	5	NEDD4L
0.004366226	0.25884475	0.328	0.406	1	5	PPP1R12A
0.004453232	0.330043549	0.427	0.462	1	5	MXI1
0.00447247	0.446828428	0.269	0.273	1	5	PCMTD1
0.005214717	0.308314772	0.372	0.386	1	5	ATCAY
0.005630344	0.417407277	0.314	0.328	1	5	CERS6
0.006053889	0.334442909	0.474	0.53	1	5	SPEN
0.007906562	0.356096822	0.135	0.125	1	5	PBX1
0.009262724	0.258475032	0.484	0.529	1	5	MAPRE2
0.009558247	0.250645972	0.113	0.139	1	5	KLHL8
0	2.562746522	0.451	0.048	0	6	NEFL
0	2.270672117	0.906	0.269	0	6	NEFM
0	2.02515359	0.735	0.335	0	6	MEF2C
0	1.889341771	0.978	0.418	0	6	GAP43
0	1.836402135	0.507	0.085	0	6	LPL
0	1.481687523	0.661	0.118	0	6	ADCY1
0	1.47153958	0.843	0.258	0	6	CYRIA
0	1.458599833	0.864	0.278	0	6	NELL2
0	1.338082908	0.837	0.298	0	6	SYT4
0	1.331573798	0.876	0.354	0	6	CSRP2
0	1.329892937	1	0.851	0	6	STMN2
0	1.24196556	0.533	0.09	0	6	RPRM
0	1.241521367	0.679	0.157	0	6	DAB1
0	1.220962729	0.516	0.19	0	6	DOK5
0	1.21684446	0.68	0.151	0	6	ARPP21
0	1.204743646	0.735	0.327	0	6	NEUROD6
0	1.141713959	0.623	0.245	0	6	MPPED1
0	1.079831071	0.392	0.089	0	6	GLRA2
0	1.041352763	0.441	0.087	0	6	MPP6
0	1.034321226	0.952	0.399	0	6	L1CAM
0	1.022734027	0.527	0.114	0	6	SYBU
0	1.002616706	0.413	0.053	0	6	DYNC1I1
0	0.960943302	0.396	0.115	0	6	CHST1
0	0.959225653	0.801	0.267	0	6	ENSMMUG00000063699
0	0.95081393	0.634	0.165	0	6	GPR85
0	0.925947056	0.562	0.144	0	6	ELMOD1
0	0.922753983	0.908	0.404	0	6	STMN4
0	0.92086527	0.923	0.385	0	6	MAPT
0	0.900124397	0.71	0.305	0	6	NEUROD2
0	0.889307571	0.988	0.652	0	6	UCHL1
0	0.887471484	0.42	0.089	0	6	LDB2
0	0.877060458	0.998	0.822	0	6	ENSMMUG00000060287
0	0.868689139	0.423	0.074	0	6	CAMK2B
0	0.864164827	0.955	0.471	0	6	ATP1A3
0	0.860317951	0.987	0.624	0	6	TUBB4A
0	0.854759068	0.648	0.197	0	6	EML1
0	0.851086246	0.674	0.201	0	6	PCLO
0	0.844743139	0.719	0.248	0	6	RAP1GDS1
0	0.831352903	0.826	0.313	0	6	TMEM59L
0	0.828287695	0.833	0.355	0	6	MMD
0	0.819606384	0.968	0.662	0	6	CELF2
0	0.813746701	0.611	0.19	0	6	COTL1
0	0.81043795	0.868	0.365	0	6	ANK2
0	0.805277391	0.866	0.433	0	6	ATP1B1
0	0.804591799	0.998	0.748	0	6	INA
0	0.802837903	0.717	0.221	0	6	PGM2L1
0	0.797520415	0.741	0.241	0	6	EEF1A2
0	0.791710261	0.729	0.299	0	6	CD47
0	0.779845004	0.812	0.361	0	6	LHX2
0	0.775634576	0.692	0.262	0	6	RNF220
0	0.764255051	0.201	0.029	0	6	ADAMTS3
0	0.754344218	0.676	0.224	0	6	LINGO1
0	0.754121074	1	0.899	0	6	MAP1B
0	0.749410935	0.571	0.158	0	6	RAC3
0	0.741990275	0.855	0.409	0	6	ENSMMUG00000061128
0	0.729121473	0.393	0.071	0	6	SLITRK5
0	0.72318178	0.743	0.273	0	6	PAK5
0	0.718837907	0.857	0.386	0	6	WASF1
0	0.717079176	0.672	0.2	0	6	ANK3
0	0.71379609	0.67	0.254	0	6	SLA
0	0.708642081	0.841	0.405	0	6	HMGCR
0	0.70750814	0.999	0.837	0	6	TUBB3
0	0.696786265	0.68	0.224	0	6	SYP
0	0.69612635	0.483	0.146	0	6	LIMCH1
0	0.695860896	0.596	0.173	0	6	PRRT2
0	0.695492024	0.999	0.848	0	6	DPYSL2
0	0.689369653	0.275	0.055	0	6	F3
0	0.685850022	0.524	0.142	0	6	ADD2
0	0.668987975	0.736	0.257	0	6	TNIK
0	0.661694547	0.502	0.118	0	6	CCDC184
0	0.659829328	0.758	0.286	0	6	NBEA
0	0.658499643	0.793	0.329	0	6	DAAM1
0	0.657791437	0.74	0.275	0	6	CRIP2
0	0.653696289	0.937	0.508	0	6	MAPRE2
0	0.65247861	0.546	0.158	0	6	NDRG1
0	0.647623582	0.731	0.298	0	6	PRXL2A
0	0.647287497	0.385	0.068	0	6	SCN2A
0	0.639039714	0.846	0.36	0	6	TMOD2
0	0.637166419	0.687	0.235	0	6	CDKN2D
0	0.633149958	0.88	0.422	0	6	KIF1A
0	0.631281719	0.271	0.059	0	6	SCG2
0	0.6265993	0.644	0.213	0	6	PPFIA2
0	0.623783142	0.711	0.268	0	6	SPTBN1
0	0.622835913	0.425	0.092	0	6	DNM3
0	0.621944379	0.539	0.147	0	6	C14H11orf87
0	0.616391063	0.622	0.219	0	6	VOPP1
0	0.615152534	0.477	0.118	0	6	ENSMMUG00000061242
0	0.613761998	0.404	0.09	0	6	DMTN
0	0.61375081	0.997	0.867	0	6	YWHAZ
0	0.612259031	0.853	0.346	0	6	JPH4
0	0.598775347	0.44	0.108	0	6	ACSL4
0	0.596833586	0.668	0.228	0	6	ACOT7
0	0.586348859	0.334	0.065	0	6	MCTP1
0	0.579129547	0.802	0.341	0	6	MTURN
0	0.571999395	0.825	0.363	0	6	GABRB3
0	0.570450179	0.306	0.075	0	6	ST6GALNAC5
0	0.560331385	0.2	0.025	0	6	RSPO3
0	0.560190335	0.406	0.102	0	6	GABRA3
0	0.559137933	0.394	0.084	0	6	GAS7
0	0.555192091	0.413	0.108	0	6	FAT4
0	0.554524899	0.682	0.262	0	6	ENSMMUG00000054106
0	0.550458801	0.397	0.104	0	6	PRRT1
0	0.546912319	0.488	0.143	0	6	CLMP
0	0.543274745	0.574	0.191	0	6	CNRIP1
0	0.542734224	0.729	0.271	0	6	ENO2
0	0.542365674	0.518	0.169	0	6	NEO1
0	0.540586599	1	0.994	0	6	TUBA1A
0	0.534950029	0.776	0.332	0	6	PRKAR2B
0	0.533972025	0.273	0.063	0	6	TMOD1
0	0.532825328	1	0.983	0	6	STMN1
0	0.52738324	0.322	0.043	0	6	TRIM67
0	0.526558781	0.655	0.239	0	6	CXADR
0	0.525602674	1	0.944	0	6	TUBB
0	0.524446878	0.507	0.166	0	6	POLE4
0	0.523294486	0.669	0.252	0	6	RUNX1T1
0	0.522228905	0.454	0.124	0	6	PSD
0	0.517660739	0.41	0.119	0	6	SLC44A5
0	0.513809637	0.429	0.129	0	6	ACTR3B
0	0.511802199	0.644	0.238	0	6	B3GALNT1
0	0.511617189	0.728	0.257	0	6	SNAP91
[truncated: 19,317 more rows]
