# Supplementary material for: Temporal transcriptomic dynamics in developing macaque neocortex
Source: eLife. 2024 Feb 28;12:RP90325. doi: 10.7554/eLife.90325 (PMC10911584; doi:10.7554/eLife.90325)
Supplement: Supplementary file 2. [file elife-90325-supp2.csv]

	milestone_id	feature_id	importance
1	2	CENPF	0.157026846
2	2	SMC4	0.153891295
3	4	HMGB2	0.14753837
4	2	RAD21	0.147261978
5	2	CKAP2	0.146509633
6	4	CENPF	0.143597091
7	2	ASPM	0.140084077
8	2	HMGB2	0.137916774
9	4	ENSMMUG00000005593	0.137182938
10	4	CKS2	0.129202068
11	4	ASPM	0.127543535
12	4	GTSE1	0.121050513
13	4	RAD21	0.120791885
14	2	TOP2A	0.117878795
15	2	AURKA	0.117821122
16	2	TPX2	0.117468765
17	4	HMMR	0.115049977
18	4	AURKA	0.109942149
19	2	DLGAP5	0.107513527
20	2	PRC1	0.103373118
21	2	PTTG1	0.102119823
22	4	CDC20	0.100664246
23	2	CKAP2L	0.100664244
24	2	PLK1	0.100019973
25	4	DLGAP5	0.099001837
26	2	ENSMMUG00000051392	0.098610485
27	4	CCNB1	0.097604301
28	2	NUCKS1	0.097205961
29	2	CCNB1	0.096655591
30	4	CLU	0.094468856
31	4	CENPE	0.094273924
32	2	KIF20B	0.093885014
33	4	TOP2A	0.093086661
34	4	CKAP2L	0.090663458
35	2	CENPE	0.090021812
36	2	HMMR	0.089258356
37	4	PTTG1	0.087783597
38	4	MKI67	0.086089478
39	4	CCNA2	0.0845637
40	2	NCAPG	0.084040033
41	2	ZWINT	0.083965027
42	4	SMC4	0.082705544
43	2	GTSE1	0.082308757
44	2	ENSMMUG00000005593	0.082203131
45	4	TPX2	0.081823282
46	4	ZWINT	0.081784677
47	4	SLC1A3	0.081589264
48	2	NUSAP1	0.081158593
49	4	STMN1	0.080354075
50	2	PTN	0.078851117
51	4	ENSMMUG00000004633	0.078367586
52	4	UBE2S	0.078367303
53	2	H2AFZ	0.077506202
54	2	ECT2	0.076896844
55	4	KNL1	0.076776475
56	4	PTN	0.076689318
57	2	UBE2S	0.076508092
58	2	MKI67	0.076419049
59	4	TUBA1C	0.07599298
60	2	TTYH1	0.075465546
61	2	KIFC1	0.07497692
62	4	BUB1	0.074975827
63	4	KIFC1	0.074768709
64	4	ENSMMUG00000021023	0.074755727
65	4	KIF20B	0.074708825
66	4	NUF2	0.074056935
67	2	ENSMMUG00000004633	0.07351388
68	2	SGO2	0.073465411
69	4	CKAP5	0.072566427
70	2	KIF4A	0.072506976
71	4	TTYH1	0.072138976
72	2	DOK5	0.072043342
73	2	SFRP1	0.071870182
74	4	GAS2L3	0.071722501
75	2	HP1BP3	0.071637336
76	2	KIF20A	0.071372966
77	4	NUSAP1	0.070698376
78	2	DEPDC1	0.07016567
79	4	LBR	0.069873983
80	2	CKS2	0.0698366
81	2	BIRC5	0.069593391
82	2	KNL1	0.069417784
83	4	ATP1B2	0.069410329
84	4	H2AFX	0.069049546
85	2	CEP55	0.068966522
86	2	CDC20	0.068494064
87	4	NDC80	0.068351746
88	2	MIS18BP1	0.068256287
89	4	ECT2	0.067177892
90	4	SGO2	0.066968747
91	4	CDKN2C	0.066890056
92	4	ANP32E	0.066588923
93	4	PLK1	0.065935755
94	4	PRC1	0.065861861
95	2	STMN1	0.065768893
96	2	CLU	0.065508316
97	2	FABP7	0.06505028
98	4	CKAP2	0.065044022
99	2	VIM	0.064501121
100	2	NUF2	0.063997243
101	2	CDCA8	0.063934773
102	2	DDAH1	0.063649066
103	2	GAS2L3	0.063600889
104	4	CEP55	0.063480592
105	2	PIMREG	0.063296029
106	4	ATP1A2	0.063149644
107	2	PEA15	0.063032128
108	4	ENSMMUG00000051392	0.062209475
109	2	ENSMMUG00000017466	0.062094298
110	4	VIM	0.061926484
111	2	BUB1	0.061765566
112	2	ANP32E	0.061393264
113	2	ID4	0.061330003
114	2	ATP1B2	0.061324399
115	2	SLC1A3	0.061166515
116	4	DDAH1	0.06090997
117	2	ENSMMUG00000064545	0.060708346
118	2	NDC80	0.060583469
119	2	CDKN2C	0.060313402
120	2	TUBA1C	0.059817814
121	4	C1QL2	0.059461904
122	2	BUB3	0.059074497
123	4	KIF15	0.058992911
124	2	CKS1B	0.058672615
125	4	ENSMMUG00000017466	0.058498626
126	2	MAD2L1	0.058052895
127	4	ZFP36L1	0.05780327
128	4	FAM107A	0.057426429
129	2	RACGAP1	0.056937032
130	2	ARHGAP11A	0.056822158
131	2	H2AFX	0.056754572
132	2	SPAG5	0.05643391
133	2	KIF2C	0.056285162
134	4	CDCA2	0.055961052
135	2	DKK3	0.055799437
136	2	ENSMMUG00000021023	0.055374498
137	2	CKAP5	0.05494666
138	4	HMGB1	0.054943329
139	4	SFRP1	0.054185774
140	4	CDCA8	0.053983927
141	4	KIF2C	0.053352148
142	4	PEA15	0.053209541
143	2	BUB1B	0.053101414
144	2	LBR	0.053077732
145	2	CCNA2	0.052942262
146	4	KIF20A	0.0528414
147	4	MAD2L1	0.052822895
148	4	LMNB1	0.052494829
149	2	KPNA2	0.052015901
150	4	SPAG5	0.051707504
151	4	BUB1B	0.051538041
152	4	RACGAP1	0.051511657
153	4	MLC1	0.050916716
154	2	OLFM2	0.050910257
155	4	BUB3	0.050903574
156	4	EDNRB	0.050827065
157	2	ILF2	0.05065251
158	2	CDK1	0.050614954
159	2	PBK	0.049770377
160	4	HNRNPA2B1	0.049361552
161	2	ENSMMUG00000002200	0.048940797
162	4	DOK5	0.048614696
163	4	ENSMMUG00000002200	0.048478014
164	2	ATP1A2	0.048344309
165	2	SAT1	0.048110667
166	4	HP1BP3	0.048096313
167	4	CCNB2	0.048034455
168	4	DKK3	0.048002315
169	4	NUCKS1	0.047886478
170	4	FOXM1	0.047641512
171	4	ENSMMUG00000064545	0.047444907
172	2	PRR11	0.047421488
173	4	TROAP	0.047005029
174	2	MOXD1	0.046876525
175	2	NFE2L2	0.046754664
176	4	HOPX	0.046754607
177	2	SPARC	0.046449648
178	4	EPB41L3	0.046392071
179	4	NEK2	0.046310532
180	4	PTPRZ1	0.046153022
181	2	EDNRB	0.045979535
182	4	RGCC	0.045475174
183	4	PBK	0.045445939
184	2	GPM6B	0.045385245
185	4	MOXD1	0.045153654
186	4	FABP7	0.045080473
187	4	CKS1B	0.045074329
188	2	SUN2	0.044996205
189	4	SOX9	0.04493581
190	2	ENSMMUG00000018360	0.044623993
191	4	HMGCS1	0.044575158
192	4	TUBB	0.044539616
193	4	ID4	0.044381075
194	4	SPARC	0.04417336
195	4	KIF4A	0.044006446
196	2	FAM107A	0.043534535
197	2	PTPRZ1	0.043428311
198	2	IL33	0.043276092
199	4	CDKN2D	0.043157502
200	2	KIF14	0.042802935
201	2	SGO1	0.042621139
202	4	KIF23	0.042618538
203	4	CDC25B	0.04246283
204	4	MGLL	0.042370479
205	4	KNSTRN	0.042219809
206	2	SOX3	0.042088152
207	4	KPNA2	0.041991535
208	4	MIS18BP1	0.041972605
209	4	PIMREG	0.041956866
210	2	KIF5B	0.041246696
211	4	TNC	0.041179617
212	4	NCAPG	0.040884578
213	4	AKAP12	0.040767722
214	2	GFAP	0.040731874
215	2	DBF4	0.040714183
216	4	KIF14	0.040448196
217	2	ZFP36L1	0.040345967
218	4	IQGAP2	0.040318414
219	4	HTRA1	0.039713719
220	4	ENSMMUG00000017966	0.039703231
221	2	IQGAP2	0.039680396
222	4	MGST3	0.039402653
223	2	SOX9	0.039267841
224	4	NCAPH	0.039174109
225	2	HMGB1	0.03914072
226	2	SRI	0.03913131
227	4	KIF11	0.039026017
228	2	SCRN1	0.038939662
229	4	ENSMMUG00000056838	0.038902137
230	2	HSPB1	0.038654139
231	4	NDRG2	0.038328318
232	2	CDC25B	0.038299339
233	2	NEK2	0.038269184
234	4	OLFM2	0.038237738
235	2	HOPX	0.037840334
236	4	ARHGAP11A	0.03768904
237	2	ENO1	0.037661585
238	4	GPM6B	0.037587498
239	2	MLC1	0.037526806
240	4	SFPQ	0.03746258
241	4	SGO1	0.037419833
242	4	PRR11	0.037174447
243	4	PON2	0.037167559
244	4	NRG1	0.037023955
245	2	PMP22	0.036992123
246	4	CDC42EP1	0.036736133
247	4	SCN4B	0.036670105
248	4	ILF2	0.03647857
249	2	KIF11	0.036355266
250	2	EPB41L3	0.036299077
251	2	HNRNPA2B1	0.036205259
252	2	FOXM1	0.036140162
253	2	HMGCS1	0.036027067
254	2	TUBA1A	0.035835706
255	4	MZT1	0.035808345
256	4	SRI	0.035644023
257	2	RGCC	0.035560806
258	4	S1PR1	0.035542056
259	2	GSTM4	0.035463329
260	4	GATM	0.035355733
261	4	KIF18A	0.035277972
262	4	ENSMMUG00000018360	0.035194368
263	4	MFGE8	0.03515823
264	2	CPNE2	0.035112606
265	4	GFAP	0.034972025
266	2	UBE2T	0.034802419
267	4	SLC29A1	0.0347956
268	4	SAT1	0.034391293
269	4	G2E3	0.034240781
270	2	G2E3	0.034235112
271	4	CCNF	0.034002201
272	2	KNSTRN	0.033916181
273	2	JPT1	0.033666535
274	4	CNTRL	0.033378475
275	4	SOX3	0.033377842
276	4	H2AFZ	0.033362591
277	2	CNN3	0.033310251
278	4	GAPDH	0.033209011
279	4	BIRC5	0.033037537
280	2	GAPDH	0.033011622
281	2	NDRG2	0.032884388
282	2	HES1	0.032755958
283	2	PSAP	0.032679238
284	4	DEPDC1	0.032571448
285	4	SOD1	0.03251008
286	2	CCNG2	0.032411902
287	2	SCN4B	0.032410591
288	2	PRXL2A	0.032396283
289	2	MSN	0.032387183
290	4	CCNG2	0.032381092
291	2	BCAN	0.032311957
292	2	CPNE4	0.032282817
293	2	TNC	0.032258967
294	2	NCAPH	0.032233127
295	2	MLLT11	0.032232558
296	2	AKAP12	0.032164097
297	4	TMPO	0.032101137
298	4	TUBA1A	0.031929385
299	4	RAB6B	0.03188449
300	2	MGLL	0.031868249
301	4	NFE2L2	0.031857836
302	4	PSRC1	0.031799778
303	2	HJURP	0.031725344
304	2	TSPAN7	0.031636662
305	2	SFPQ	0.031531637
306	4	SYT11	0.031390846
307	2	TSPAN3	0.031276566
308	4	CPNE2	0.031216885
309	2	MGST3	0.031174919
310	2	RANGAP1	0.031123772
311	2	KIF15	0.031083068
312	4	SCRN1	0.030614891
313	2	CENPC	0.030589323
314	2	SERPINH1	0.030589005
315	4	BCAN	0.030530745
316	2	PON2	0.030513795
317	4	ENSMMUG00000000983	0.030502924
318	4	H2AZ2	0.030182262
319	2	ENSMMUG00000000983	0.030175698
320	4	TSPAN7	0.030028879
321	2	LMNB1	0.030006818
322	2	TROAP	0.029955994
323	4	CDK1	0.029867636
324	2	CIT	0.029809509
325	2	TMBIM6	0.029796242
326	4	TACC3	0.029525044
327	2	RAB6B	0.029281198
328	2	TACC3	0.0292347
329	4	DBF4	0.02918181
330	4	RTKN2	0.029140406
331	4	CD63	0.029139994
332	4	TTK	0.029051707
333	2	MZT1	0.029026559
334	4	PSAP	0.029022161
335	2	GNAI2	0.028977494
336	4	SUN2	0.02886807
337	2	TMPO	0.02881968
338	4	MSMO1	0.028788689
339	2	S1PR1	0.028708983
340	4	ANLN	0.028587963
341	4	CDCA3	0.028549996
342	2	MSMO1	0.028442351
343	2	VEPH1	0.028430587
344	4	NDE1	0.028401533
345	4	HEPACAM	0.028289487
346	2	FKBP9	0.028284963
347	4	KIF5B	0.028237312
348	4	EZH2	0.028212288
349	2	SLC35F1	0.028176275
350	2	LITAF	0.028027118
351	4	TFAP2C	0.027923217
352	2	TUBB	0.027879578
353	4	JPT1	0.027879227
354	4	LRP10	0.027817497
355	4	ENSMMUG00000040370	0.027817457
356	2	SEPTIN2	0.027767123
357	2	CCNB2	0.027456043
358	4	TSPAN3	0.02740503
359	2	MFGE8	0.027391618
360	4	GDPD2	0.027380119
361	2	SCD5	0.027361669
362	4	HSPB1	0.027355096
363	4	GOLIM4	0.027323707
364	2	C1QL2	0.027191955
365	2	SYT11	0.027191499
366	2	ARHGAP19	0.027010015
367	2	HTRA1	0.026932549
368	4	SEL1L3	0.026883421
369	2	DBI	0.026872556
370	4	ITM2C	0.026832681
371	2	NRG1	0.026751079
372	4	ERH	0.026565422
373	2	PSRC1	0.026556992
374	2	CDC42EP1	0.026545541
375	2	HDGF	0.026508209
376	2	TKTL1	0.026431139
377	4	TPI1	0.02641512
378	4	GSTM4	0.026346138
379	2	CEP70	0.026304363
380	2	GATM	0.026154277
381	4	ENSMMUG00000012140	0.026124627
382	2	ENSMMUG00000022075	0.02605874
383	2	SOX21	0.026057792
384	2	GPSM2	0.026050294
385	2	SNX3	0.02598359
386	2	MAZ	0.025957866
387	4	PMP22	0.025833517
388	2	ITGB5	0.025793153
389	4	FEZ2	0.025721754
390	4	ITM2B	0.025718972
391	4	FSTL1	0.025708813
392	4	MSN	0.025651344
393	4	ARHGAP5	0.025605687
394	4	IL33	0.025508732
395	2	RAI14	0.025491336
396	2	HEY1	0.025475882
397	4	CIT	0.025452318
398	4	SCD5	0.025397294
399	2	ALDOC	0.025348862
400	4	S100A16	0.02519494
401	2	ENSMMUG00000004318	0.025162257
402	2	ITM2B	0.025156029
403	4	KRIT1	0.025153885
404	2	SLC29A1	0.025114333
405	2	ENSMMUG00000017966	0.025076157
406	4	DBI	0.025073241
407	4	CDK19	0.025072399
408	4	KCNJ10	0.02505975
409	2	ITM2C	0.025053274
410	2	CHST1	0.024925575
411	2	CDKN1B	0.024815712
412	4	CD81	0.024803134
413	4	TIMP3	0.024734415
414	2	SPARCL1	0.024706407
415	2	PPP2R5E	0.024695722
416	4	PTPRF	0.02464778
417	4	GALNT16	0.024505122
418	4	STMN4	0.024475479
419	2	NDE1	0.0244472
420	2	NOTCH2	0.024400464
421	2	TMEM14B	0.024255472
422	4	MYO6	0.024179462
423	2	COMT	0.024178222
424	2	CDCA2	0.024118309
425	4	RANGAP1	0.024034488
426	2	H2AZ2	0.023999165
427	4	HES1	0.02396038
428	4	LPL	0.023906348
429	4	IQGAP3	0.023878488
430	4	NME2	0.023826773
431	4	ASTN1	0.023820511
432	2	TPI1	0.023731506
433	4	SMC2	0.023707913
434	4	AURKB	0.023702474
435	2	CDCA3	0.023598683
436	4	COMT	0.023521445
437	4	BRD8	0.023450176
438	4	TRIM9	0.023383042
439	4	ENSMMUG00000004318	0.023346747
440	2	IGFBP5	0.023339168
441	4	ENSMMUG00000022075	0.023266498
442	4	CDK5RAP2	0.023250989
443	2	CNTRL	0.023221231
444	2	CDKN3	0.02321125
445	4	CALR	0.023195169
446	2	IQGAP3	0.02318569
447	2	MCM4	0.023162592
448	2	AURKB	0.023125301
449	4	HNRNPH1	0.022998292
450	2	KCNJ10	0.022965847
451	4	CENPC	0.022863568
452	4	CDC25C	0.022783377
453	2	BRD8	0.022752451
454	2	SEPTIN7	0.022714658
455	4	UBE2T	0.02270256
456	4	AQP4	0.022699417
457	2	TTK	0.022684967
458	4	CNN3	0.022676497
459	2	KIF18A	0.022655851
460	2	CD63	0.022651224
461	2	MGST1	0.022564393
462	4	APOE	0.022551207
463	2	LRATD2	0.022526945
464	4	ADGRG1	0.022515831
465	2	COBL	0.022466786
466	2	TSPAN5	0.022237913
467	2	DEPDC1B	0.02222928
468	4	ENTPD2	0.022164911
469	2	APOE	0.022076177
470	2	ARHGAP5	0.022052935
471	4	CDKN3	0.022011706
472	2	KIF23	0.021997633
473	4	CCDC80	0.021982844
474	4	HDGF	0.021900663
475	2	SOD1	0.021883966
476	2	ENSMMUG00000039070	0.021872099
477	4	NCAPD2	0.021829141
478	4	APP	0.021792119
479	4	SEPTIN7	0.021786104
480	2	CENPJ	0.021658035
481	2	FAM219A	0.021628751
482	4	FEZF2	0.021497653
483	4	DEPDC1B	0.021475991
484	2	SLCO1C1	0.021410539
485	4	MCM4	0.021359721
486	2	MRC2	0.021353432
487	4	SMARCA2	0.02115555
488	2	SPINT2	0.021089856
489	4	CENPJ	0.021061044
490	2	KIF1B	0.021010355
491	2	PAX6	0.020997604
492	2	RTKN2	0.020987546
493	2	SMARCA2	0.020793996
494	2	PTPRF	0.020736531
495	2	HNRNPUL1	0.020659196
496	2	RAB31	0.020624494
497	2	AQP4	0.020600835
498	4	ABAT	0.020580625
499	4	UNG	0.020435962
500	2	FADS1	0.020374359
501	4	NDN	0.02035063
502	2	ENSMMUG00000056838	0.020309988
503	4	SLC35F1	0.020291414
504	2	SEL1L3	0.020274669
505	2	CD81	0.020264266
506	2	REEP4	0.020213625
507	2	CDK19	0.020172183
508	4	RAI14	0.020164048
509	4	TMEM14B	0.020128861
510	4	LITAF	0.020025828
511	4	EGLN3	0.019992692
512	2	SLC22A17	0.019948455
513	2	CDK5RAP2	0.019943003
514	2	CCDC80	0.019904245
515	2	TRIM9	0.019847409
516	2	CDKN2D	0.019837473
517	2	MEST	0.019821611
518	4	KIF22	0.01976265
519	2	APLP2	0.019680447
520	2	ENSMMUG00000018687	0.019644182
521	4	FAM181B	0.019640043
522	4	CCNI	0.019613065
523	4	ENSMMUG00000056736	0.019534906
524	2	OAT	0.019466371
525	2	HNRNPH3	0.019434863
526	2	HEPACAM	0.019320294
527	4	MYORG	0.019239377
528	2	ABAT	0.019186108
529	2	PPT1	0.019142515
530	2	MMP15	0.019135244
531	2	PXMP2	0.019121001
532	2	OGFRL1	0.019063808
533	2	MCM6	0.019042903
534	4	ALDOC	0.019021163
535	2	TIMP3	0.019014495
536	2	QKI	0.019004539
537	4	NOTCH2	0.018981069
538	4	ZFHX4	0.018957889
539	4	C1QTNF1	0.018912162
540	4	PRXL2A	0.01888859
541	2	SCP2	0.018826512
542	2	SPDL1	0.018770751
543	4	OIP5	0.01869927
544	4	PXMP2	0.018670828
545	4	SC5D	0.018481462
546	4	SERBP1	0.018446313
547	4	SCG5	0.018430649
548	4	CNTFR	0.018429773
549	4	ENSMMUG00000018687	0.018428785
550	4	HJURP	0.01842315
551	4	SCP2	0.018401084
552	4	SLCO1C1	0.018258647
553	4	LAMP1	0.018237251
554	2	ERH	0.018155011
555	2	NEK6	0.018136613
556	2	DPYSL2	0.018110002
557	2	NDUFA4	0.018051957
558	2	ENSMMUG00000056736	0.018047001
559	4	PARVA	0.018040829
560	4	MCM6	0.018007831
561	4	SRP14	0.018003082
562	4	PAG1	0.017987963
563	4	ASCL1	0.017949294
564	2	KRIT1	0.017895478
565	4	PARPBP	0.017889867
566	4	SNX3	0.017871599
567	4	PAX6	0.017841561
568	4	MEST	0.017822529
569	2	SMC2	0.017811799
570	2	ADCYAP1R1	0.017650899
571	4	GNG12	0.01764999
572	2	MOB3B	0.017646248
573	4	OAT	0.017621794
574	4	CLCN3	0.017617118
575	4	SLC22A17	0.017602506
576	2	TPP1	0.017597435
577	2	UNG	0.017574289
578	4	LPCAT1	0.017530539
579	4	LSS	0.01752131
580	2	EIF4G2	0.017416767
581	4	RAB6A	0.017350259
582	2	MYO6	0.01734573
583	4	S100B	0.017327928
584	4	HNRNPR	0.017324446
585	2	LHX2	0.017300908
586	2	GALNT16	0.017265013
587	2	CD82	0.017251806
588	4	CORO1C	0.017161687
589	4	IGFBP5	0.017143033
590	4	CANX	0.017102259
591	4	P4HB	0.017089216
592	2	MDFI	0.017038029
593	4	ENSMMUG00000039070	0.017017207
594	2	STARD7	0.017006962
595	4	SPDL1	0.016929485
596	4	LRATD2	0.016907414
597	2	CHL1	0.016891006
598	4	RAB31	0.016887427
599	4	TKTL1	0.016821728
600	4	ENSMMUG00000001858	0.016793274
601	2	CANX	0.016774851
602	2	CORO1C	0.016771224
603	2	FEZ1	0.016761705
604	4	GNAI2	0.01670619
605	2	FADS2	0.01666484
606	4	SPARCL1	0.016582516
607	4	MLLT11	0.016521925
608	2	CDC25C	0.016512803
609	4	SEPHS1	0.016498127
610	4	MOB3B	0.016483186
611	2	S100A16	0.016370244
612	4	MCM2	0.016305186
613	4	ANXA5	0.016254554
614	4	CCDC88A	0.016253243
615	2	TFAP2C	0.016215227
616	2	EEF2	0.016213559
617	2	KIF1A	0.016137727
618	2	ASCL1	0.016079422
619	2	LSM5	0.016011207
620	2	CHMP4B	0.015990762
621	2	ENSMMUG00000015946	0.015983898
622	4	CBX1	0.015943636
623	4	QDPR	0.015939511
624	2	STMN4	0.015931313
625	4	SCARA3	0.015891893
626	2	MCM2	0.015878089
627	4	EFNB1	0.015872044
628	4	HEY1	0.015853413
629	2	GOLIM4	0.015850408
630	2	UCHL1	0.015848601
631	4	CEP70	0.015824963
632	2	FABP5	0.01579896
633	2	KIF22	0.015729613
634	2	GDPD2	0.015724968
635	4	ITGB5	0.015708117
636	2	DDR1	0.015693169
637	4	EMX2	0.015685993
638	4	PPP2R5E	0.015667
639	4	ST6GALNAC5	0.015648178
640	4	ATP6AP2	0.015605616
641	2	ENSMMUG00000012140	0.015593313
642	4	MRC2	0.01556534
643	2	EZH2	0.015501151
644	2	PARPBP	0.015479301
645	4	FAM219A	0.015468701
646	4	ENO1	0.015403068
647	4	TPP1	0.01539915
648	2	IPO5	0.015349398
649	2	KMT5A	0.015302138
650	4	FGFR1	0.015299613
651	2	FBXO5	0.015295751
652	4	ELOVL5	0.015276056
653	2	CHPT1	0.015260646
654	4	NDUFA4	0.015247707
655	2	MCM3	0.015235603
656	4	TULP3	0.01521192
657	2	ACSBG1	0.015206222
658	2	CCNF	0.015165543
659	4	CHST1	0.015140833
660	4	SLC25A3	0.015137789
661	4	ST13	0.015088088
662	4	GPSM2	0.015020323
663	2	CYB5R3	0.01501739
664	2	NME2	0.014942615
665	2	HDAC2	0.014830771
666	4	DDR1	0.014805383
667	4	CNBP	0.014751071
668	4	GLI3	0.014745877
669	2	CSDC2	0.014740923
670	2	VAT1L	0.01473481
671	2	ENSMMUG00000040370	0.014718518
672	2	GRM3	0.014716986
673	4	STARD7	0.014698976
674	2	SHCBP1	0.014665254
675	4	ARL6IP5	0.014664736
676	2	CFAP298	0.014619077
677	4	ARHGAP19	0.014604371
678	4	RAN	0.014604158
679	4	ITFG1	0.014581213
680	4	PHGDH	0.0145557
681	4	CPNE4	0.014542189
682	4	COL11A1	0.01450234
683	2	TSPAN6	0.014502001
684	4	NOG	0.014479181
685	2	SPC25	0.014465705
686	2	REEP5	0.014446836
687	2	PARVA	0.014434494
688	2	GNAO1	0.014434031
689	4	CFAP298	0.014381612
690	2	CLIC4	0.014327292
691	4	FADS2	0.014303719
692	2	ENSMMUG00000056043	0.014233869
693	4	VEPH1	0.014209558
694	4	DPYSL2	0.014188617
695	4	KBTBD2	0.014185753
696	2	SKA1	0.014151076
697	4	LHX2	0.014146528
698	4	CD82	0.014075937
699	4	CCAR1	0.014075407
700	4	FAM171B	0.014036568
701	4	CHPT1	0.014018078
702	4	ASPH	0.013952282
703	2	CCNI	0.013923522
704	2	GLI3	0.013921258
705	2	CKB	0.013920085
706	4	MAZ	0.013854571
707	4	CIP2A	0.013821824
708	2	C1QTNF1	0.013804278
709	4	CLIP3	0.01379758
710	4	RABGAP1	0.013747771
711	2	LPL	0.013715521
712	4	SHCBP1	0.013715101
713	4	SPCS2	0.013669879
714	2	VCL	0.013659211
715	4	SOX21	0.013653907
716	2	FAM171B	0.013653865
717	2	NFIA	0.01364094
718	4	HDAC2	0.013640057
719	4	PIF1	0.013636648
720	4	NSD2	0.013593031
721	2	RTN4	0.01358146
722	2	ANLN	0.013531335
723	4	FADS1	0.013531303
724	2	GET1	0.013531123
725	2	FEZ2	0.013519899
726	4	FEZ1	0.013514673
727	4	ELAVL2	0.013490881
728	2	CD9	0.013458303
729	2	AMZ2	0.013444239
730	2	FSTL1	0.013442013
731	4	FBXO5	0.01342717
732	2	SEPTIN11	0.013423443
733	4	C1H1orf198	0.013395141
734	4	THRA	0.013385889
735	2	SLC7A10	0.01337352
736	2	CST3	0.013354761
737	2	ARHGEF39	0.013314346
738	4	PHLPP1	0.013230035
739	2	SDC2	0.013208654
740	2	ADD1	0.013165751
741	4	F3	0.013146115
742	4	ACAD10	0.013126031
743	2	ENSMMUG00000038373	0.013087031
744	4	BMP7	0.013065201
745	2	ETV5	0.013033447
746	2	LPAR1	0.013023484
747	4	FKBP9	0.013014074
748	4	CBX3	0.012992211
749	2	CALM3	0.012926847
750	4	TSPAN5	0.012901418
751	2	F3	0.012899126
752	2	RAB6A	0.012882915
753	2	PHLPP1	0.012824195
754	4	CST3	0.012778531
755	2	TMOD2	0.012744798
756	4	VAT1L	0.012723009
757	4	MCM3	0.012622968
758	2	PLTP	0.012603352
759	2	NPDC1	0.012603216
760	4	NDP	0.012593697
761	4	REEP5	0.012591814
762	2	BMP7	0.012564427
763	4	TMBIM6	0.012549658
764	4	MDFI	0.012540427
765	2	TKT	0.012535231
766	2	RPS2	0.012522546
767	4	SWAP70	0.012462247
768	4	AIF1L	0.012442127
769	2	ATP5MC2	0.012401462
770	4	CDKN1B	0.012384465
771	4	GSTP1	0.012382491
772	4	HSPA9	0.01237639
773	2	NFE2L1	0.012374333
774	4	EIF4A2	0.012355602
775	4	UBL3	0.01233918
776	4	CPLX2	0.012336661
777	2	CD164	0.012315864
778	2	EGLN3	0.01229545
779	4	HNRNPUL1	0.012289995
780	4	INPPL1	0.01227564
781	2	MYORG	0.012246085
782	2	CALR	0.012221165
783	4	SDC2	0.012211234
784	4	CD9	0.012189832
785	4	GOLM1	0.012188269
786	2	SFXN5	0.012182575
787	2	VEZF1	0.012166951
788	4	HNMT	0.012148481
789	2	EMX2	0.012148372
790	4	RACK1	0.012137613
791	4	RTN4	0.0121267
792	4	CLIC4	0.012093949
793	4	RGS20	0.012090408
794	4	ENSMMUG00000003073	0.012064836
795	2	ENSMMUG00000053116	0.012056191
796	2	ENSMMUG00000065238	0.012040345
797	2	CBX1	0.012015415
798	2	CNTFR	0.012007668
799	2	EFNB1	0.011985445
800	4	LFNG	0.011976254
801	4	ENSMMUG00000009289	0.011963859
802	2	LAMP1	0.011946099
803	4	SEPTIN11	0.011919588
804	2	APP	0.011916786
805	2	SLC25A3	0.011909313
806	4	SERINC1	0.011894214
807	4	FAM3C	0.011886133
808	2	CYSTM1	0.011877409
809	2	MTSS2	0.01186791
810	2	RAN	0.011853995
811	4	NES	0.011828973
812	2	ACO1	0.011811998
813	2	PAG1	0.011756226
814	4	EIF3I	0.01171412
815	2	RHPN2	0.011685749
816	2	ENSMMUG00000011868	0.011673989
817	4	TSPAN6	0.011663377
818	4	APLP2	0.011638574
819	2	EEF1A1	0.011636315
820	2	TULP3	0.011620957
821	2	PHGDH	0.011597702
822	4	GNAQ	0.011588492
823	4	CRYL1	0.011587649
824	4	PAM	0.011587078
825	4	RTN1	0.011568407
826	2	HNRNPA0	0.011561037
827	4	CTSL	0.011534266
828	4	C16H17orf49	0.011521821
829	4	AMZ2	0.011508282
830	2	PRDX1	0.011476527
831	4	FXYD6	0.011441455
832	4	LSM5	0.01143746
833	4	SFXN5	0.011401064
834	2	ENSMMUG00000064281	0.011364382
835	2	ENSMMUG00000005880	0.011358754
836	4	CREB5	0.011342142
837	2	GFRA2	0.011340396
838	2	ENTPD2	0.011338524
839	4	ENSMMUG00000011604	0.011319787
840	4	RASSF2	0.011318233
841	4	PIK3R3	0.011306358
842	4	SLC9A3R1	0.011254743
843	2	CARHSP1	0.011242208
844	2	LFNG	0.011201608
845	2	SERBP1	0.011179346
846	2	SLC15A2	0.011152554
847	4	HYLS1	0.011138957
848	2	SCG5	0.011135673
849	2	HNRNPDL	0.011135441
850	2	GNG12	0.011122773
851	2	ST13	0.011121288
852	2	ELOVL5	0.011109249
853	4	ENSMMUG00000015946	0.011100722
854	2	C15H9orf152	0.011097751
855	2	HAPLN1	0.011068672
856	4	LDOC1	0.011058288
857	4	ACSBG1	0.011057248
858	4	LRRC4B	0.011032128
859	2	NDP	0.011023277
860	2	THRA	0.011017908
861	2	ATP2B1	0.011006043
862	2	SRP14	0.010989199
863	4	TUBB2B	0.010971749
864	2	ENSMMUG00000021075	0.010951713
865	2	GSTP1	0.010950281
866	4	SPC25	0.010939271
867	2	NOG	0.010858311
868	2	PIK3R3	0.010856973
869	2	TMEM14A	0.010844757
870	2	ENSMMUG00000062333	0.010832529
871	4	GPAM	0.010831126
872	2	GGCT	0.010787517
873	4	INPP1	0.0107858
874	2	ID2	0.010776327
875	4	MEIS2	0.010776172
876	2	ANXA6	0.010765977
877	4	SPATS2L	0.010756469
878	4	SGCE	0.01075363
879	2	PREX2	0.010749001
880	2	AXL	0.010732655
881	4	VAMP3	0.010726229
882	2	PREX1	0.010716908
883	4	AXL	0.010702774
884	4	FN3KRP	0.010702102
885	4	PCNA	0.010685765
886	2	VEGFA	0.010683338
887	4	CSDC2	0.010641086
888	2	EIF4A2	0.01064082
889	4	SUGP2	0.010622134
890	2	NDFIP1	0.010593641
891	2	ENSMMUG00000031435	0.010590261
892	4	COBL	0.010583353
893	4	NCALD	0.010581829
894	4	MGST1	0.010567759
895	2	QSER1	0.010559639
896	2	BBX	0.010533991
897	2	SEPHS1	0.010530161
898	2	GPAM	0.010511802
899	4	RPL10A	0.010494542
900	4	IGF2BP2	0.010490763
901	2	GNG3	0.010487485
902	4	SQLE	0.01048651
903	4	PLCE1	0.010458179
904	2	SEPTIN8	0.010449918
905	4	PPT1	0.010432557
906	4	ATP2B1	0.010428968
907	2	EIF4H	0.010422757
908	2	GULP1	0.010401832
909	2	CENPW	0.010394899
910	4	CHMP4B	0.0103909
911	2	ST6GALNAC5	0.010387805
912	2	FEZF2	0.010379638
913	2	SLC1A2	0.010349504
914	4	SVIP	0.010314597
915	4	DDX5	0.010299709
916	4	CENPN	0.010298969
917	2	AIF1L	0.010295431
918	4	NIFK	0.010291465
919	4	SF1	0.010288434
920	4	HBEGF	0.010283874
921	2	ADGRG1	0.010262504
922	2	NCAN	0.010221517
923	4	CENPU	0.01020555
924	4	CCNY	0.010205082
925	2	NDN	0.010204561
926	4	OGFRL1	0.010203585
927	4	PACSIN3	0.010203028
928	2	SEPTIN9	0.01019337
929	2	SUGP2	0.010192445
930	2	LSS	0.010173411
931	4	ENSMMUG00000042762	0.010160902
932	2	MEIS2	0.010142914
933	2	HNRNPH1	0.010141176
934	4	CYSTM1	0.010134087
935	2	SSR3	0.010121856
936	2	OIP5	0.010120139
937	2	INPP1	0.010118711
938	4	PDHB	0.010116568
939	4	KIF1A	0.010105685
940	4	NLGN3	0.010095608
941	4	ENSMMUG00000011868	0.010087501
942	2	CRYAB	0.010074223
943	4	MAGED2	0.010068419
944	4	NAP1L1	0.010057995
945	4	KIAA0586	0.01003547
946	4	ENSMMUG00000020643	0.010024823
947	2	LYN	0.010011476
948	4	NDFIP1	0.009995082
949	4	EVA1C	0.009994704
950	4	WASF2	0.00998378
951	2	RO60	0.009972922
952	2	RAB10	0.009953215
953	4	CSPG5	0.009945987
954	4	DDAH2	0.009940831
955	2	PLCE1	0.00991213
956	4	CHL1	0.009911296
957	2	ANXA5	0.00990827
958	4	TICRR	0.009885292
959	2	DCTPP1	0.009876927
960	2	SF1	0.00982532
961	2	RTN1	0.009801052
962	4	HNRNPH3	0.009800147
963	4	HNRNPDL	0.009790517
964	4	TMEM50B	0.009780226
965	4	QSER1	0.009773472
966	4	LGALS3	0.009764788
967	4	ENSMMUG00000021075	0.009756887
968	4	CHST10	0.009750997
969	4	PCDH8	0.009747175
970	2	RBM8A	0.009735777
971	2	INPPL1	0.00973134
972	4	PAQR6	0.009724722
973	4	TTYH3	0.009719584
974	4	SLC7A10	0.009696122
975	2	ENSMMUG00000012843	0.009691011
976	2	HNRNPR	0.009689037
977	4	SLC1A2	0.009676342
978	2	NSD2	0.009662638
979	4	MSH6	0.009660201
980	4	GLUL	0.00965916
981	4	PDLIM5	0.009657711
982	4	CEP170	0.009655209
983	4	TMEM14A	0.009643504
984	2	CEP170	0.009607837
985	2	STOM	0.009606174
986	4	BNIP3	0.009595188
987	2	FKBP10	0.009593556
988	2	MFAP4	0.009589934
989	2	MTURN	0.00957664
990	4	EEF2	0.00957477
991	2	RGS20	0.009566345
992	2	ATXN7L3B	0.009555975
993	2	RPL5	0.009553784
994	4	PLTP	0.009553044
995	2	EVA1C	0.009526764
996	2	SNTA1	0.009521645
997	2	DSTN	0.009503132
998	2	TMSB10	0.009498059
999	4	ARHGAP21	0.009496175
1000	4	HNRNPD	0.009484376
1001	2	NONO	0.009482406
1002	2	TPT1	0.009461342
1003	4	METRN	0.009460473
1004	2	CMBL	0.009454681
1005	4	CBR1	0.009452267
1006	2	LMBRD1	0.009437405
1007	4	STX12	0.009417731
1008	4	ACBD7	0.009415698
1009	4	SLC15A2	0.009397996
1010	4	ENSMMUG00000061824	0.009394802
1011	4	REEP4	0.00939431
1012	2	ERBB3	0.009383226
1013	2	CBX3	0.009380814
1014	4	EFS	0.009369803
1015	4	MAGED1	0.009358979
1016	2	ZSCAN18	0.009351961
1017	2	RPL22	0.009348643
1018	2	ENSMMUG00000001210	0.009348125
1019	2	DNAJA1	0.009347399
1020	4	DHCR7	0.009338651
1021	2	TUBB2B	0.009329086
1022	4	FAM127A	0.009318862
1023	4	APC	0.009299579
1024	2	DARS1	0.009287771
1025	4	CERK	0.009280471
1026	4	CNTROB	0.009275001
1027	2	RPL10A	0.009255284
1028	4	ACO1	0.009250454
1029	4	HNRNPM	0.009247274
1030	4	ENSMMUG00000053116	0.009240907
1031	4	TKT	0.009238922
1032	2	DMRTA2	0.009236454
1033	2	C18H18orf32	0.009235411
1034	4	KHDRBS1	0.009223766
1035	4	SLC25A23	0.009220273
1036	4	FNTB	0.009211565
1037	4	DSTN	0.009211168
1038	2	FAM110A	0.00920872
1039	2	SH3GLB1	0.009203706
1040	2	GLO1	0.009196356
1041	4	SNTA1	0.009176309
1042	2	DBN1	0.009154873
1043	4	C15orf41	0.009149002
1044	2	DHCR24	0.009131731
1045	2	PHYHIPL	0.009126237
1046	2	CALU	0.009093181
1047	4	HNRNPU	0.009081276
1048	4	VCL	0.009071279
1049	4	IL6ST	0.009060335
1050	2	TOP1	0.009045938
1051	2	SOX4	0.009034361
1052	4	TRIM37	0.009020495
1053	4	ARHGDIA	0.009010131
1054	4	RO60	0.009002659
1055	2	MORF4L2	0.009002331
1056	2	CSDE1	0.008997769
1057	2	HBEGF	0.008992894
1058	2	KIAA0586	0.008988991
1059	4	NAA50	0.008975859
1060	2	WASF2	0.008968023
1061	2	LPCAT1	0.008956393
1062	4	QKI	0.008944134
1063	2	CNBP	0.008936568
1064	4	ENSMMUG00000064281	0.008909173
1065	2	ASTN1	0.008847709
1066	4	ARHGEF39	0.008846064
1067	2	ACTB	0.008839618
1068	4	EIF4G1	0.008839027
1069	2	C1QL1	0.008838881
1070	2	IL6ST	0.008836645
1071	2	ATXN10	0.008835474
1072	2	GABARAPL1	0.008827434
1073	4	CLNS1A	0.008812955
1074	4	VEZF1	0.008793881
1075	2	PPIB	0.008790805
1076	4	PLK4	0.008779993
1077	2	TMED3	0.008775098
1078	4	KIFBP	0.008765309
1079	2	MTARC2	0.008747503
1080	4	HMGN3	0.0087314
1081	2	MYL6	0.008729084
1082	2	KLF3	0.0087252
1083	4	SH3BGRL	0.00872343
1084	4	PHYHIPL	0.00869645
1085	2	FXYD6	0.008686382
1086	2	MT1E	0.008681758
1087	2	EFNB2	0.008671189
1088	2	SPCS2	0.008669914
1089	2	CHST10	0.008669195
1090	4	RPS5	0.008653019
1091	4	CKB	0.008647488
1092	2	RNF141	0.008641286
1093	2	CTNNB1	0.008638481
1094	2	TMEM50B	0.00862315
1095	2	NAP1L1	0.00862088
1096	4	PDPN	0.008618289
1097	2	MGAT4C	0.008602448
1098	2	RPL15	0.008597136
1099	2	FAM181B	0.008587212
1100	2	ASAH1	0.008579127
1101	2	DCTN3	0.008573214
1102	4	ENSMMUG00000003780	0.008555589
1103	2	HSDL2	0.008551901
1104	4	MARCKSL1	0.008535062
1105	2	LASP1	0.008509502
1106	4	ANGPT1	0.008500339
1107	4	GPBP1	0.008496944
1108	4	SALL2	0.008493811
1109	2	GALNT2	0.008491684
1110	4	KCTD15	0.00848443
1111	4	EIF4G2	0.008478228
1112	4	SOX4	0.008474383
1113	2	FKBP4	0.008445662
1114	2	RAP1GDS1	0.00844354
1115	4	CYRIA	0.008439302
1116	2	RPSA	0.008437885
1117	2	RPS27L	0.008432713
1118	4	RBP1	0.008401046
1119	2	CELF2	0.008396234
1120	2	NTPCR	0.008393427
1121	4	LRRC3B	0.008370196
1122	2	DBF4B	0.008363884
1123	2	EIF4G1	0.008358477
1124	4	SPINT2	0.008356415
1125	4	IGSF8	0.008355027
1126	2	SNRPD1	0.008354216
1127	4	TMEM47	0.008339027
1128	2	COL11A1	0.00833411
1129	2	ELAVL4	0.008327211
1130	4	ENSMMUG00000000186	0.008326274
1131	2	RB1	0.008323576
1132	2	ARHGAP21	0.008312054
1133	4	SARAF	0.00830878
1134	4	CTSB	0.008298956
1135	4	SEPTIN2	0.008293351
1136	4	CDK16	0.008291789
1137	4	FHL1	0.008285077
1138	2	QDPR	0.008284605
1139	2	ERGIC3	0.008282862
1140	2	GPR137B	0.008280404
1141	2	CLIP3	0.008276829
1142	2	PBXIP1	0.008274592
1143	4	ATP6V0D1	0.008253415
1144	4	MTARC2	0.008252108
1145	2	IGSF8	0.008244026
1146	2	NES	0.00822732
1147	2	ENSMMUG00000053392	0.008198307
1148	2	CCDC34	0.008195882
1149	4	UBE2N	0.008184103
1150	4	PPIB	0.008179703
1151	2	CAP2	0.008171679
1152	2	APH1A	0.008167241
1153	2	SREBF2	0.00816573
1154	4	TPT1	0.008160255
1155	2	CCDC18	0.008157278
1156	4	PDIA3	0.008156423
1157	2	TUBB3	0.008155884
1158	2	STIP1	0.008153364
1159	4	FKBP10	0.008131508
1160	2	RFC2	0.008128732
1161	2	IGFBP2	0.008119784
1162	4	DNAJC10	0.00811871
1163	2	PPP2CB	0.008116451
1164	4	TRIM28	0.008102401
1165	4	CYB5R3	0.008098646
1166	2	GDI2	0.008097434
1167	2	SPRED1	0.008096424
1168	2	ANP32A	0.008079364
1169	2	AIG1	0.008078115
1170	2	PPP1CB	0.008071092
1171	4	HSPD1	0.008055045
1172	4	EOMES	0.008026259
1173	4	FAM120A	0.008023772
1174	2	ANGPT1	0.008007282
1175	2	SFXN1	0.008006762
1176	4	ZEB2	0.008003005
1177	2	COX1	0.007992342
1178	4	GLIPR2	0.007985333
1179	2	ENSMMUG00000000186	0.007977747
1180	4	POLD2	0.007969613
1181	4	RPL23A	0.007967305
1182	4	ENSMMUG00000056043	0.007947132
1183	2	CYFIP1	0.007946346
1184	4	SPRED1	0.007944512
1185	4	TSC22D4	0.007919169
1186	2	PDIA6	0.007902756
1187	2	CLTC	0.007895403
1188	4	FERMT2	0.00789171
1189	2	GLIPR2	0.007890353
1190	4	CALM3	0.007888749
1191	4	GULP1	0.007887178
1192	4	CFDP1	0.007883216
1193	4	HSP90AA1	0.007875934
1194	4	SERPINH1	0.007875439
1195	4	RFC1	0.007866596
1196	2	SARAF	0.007853784
1197	4	ENSMMUG00000057449	0.007851222
1198	4	RTN3	0.00784545
1199	4	LTBP1	0.007838461
1200	4	MTSS2	0.007837695
1201	4	RPS2	0.007823021
1202	4	ENSMMUG00000031435	0.007820501
1203	4	CRMP1	0.007807272
1204	4	ENSMMUG00000011798	0.007806769
1205	4	TMED10	0.007806354
1206	2	SC5D	0.007804163
1207	2	RPL10	0.007803947
1208	4	TMX1	0.007792975
1209	2	SNN	0.007786026
1210	4	CARHSP1	0.007781171
1211	4	DARS1	0.007780992
1212	2	HNRNPF	0.007777549
1213	4	UCP2	0.007771784
1214	2	BRD2	0.007767765
1215	2	CBR1	0.007761125
1216	4	CMBL	0.007758864
1217	2	CIP2A	0.00774892
1218	2	NCAM1	0.007746214
1219	4	RAD23B	0.007733892
1220	4	RNF26	0.007713936
1221	4	RPS27L	0.007708904
1222	2	ENSMMUG00000048888	0.00770671
1223	4	DCTPP1	0.007705828
1224	2	ZBED5	0.007704573
1225	2	SLC9A3R1	0.007699054
1226	4	GSTT2B	0.007697607
1227	4	UBA1	0.007695582
1228	4	MRFAP1	0.007693423
1229	4	NDUFB2	0.007685381
1230	2	MVD	0.007678567
1231	4	SKA1	0.00767354
1232	2	HNRNPU	0.007672163
1233	4	SPCS1	0.007663173
1234	4	IDH1	0.007661552
1235	2	ERP29	0.007658303
1236	2	TM7SF2	0.007644037
1237	4	RAP1GDS1	0.007642557
1238	2	HMGA1	0.007636227
1239	2	TMBIM1	0.007631432
1240	4	ELAVL4	0.007630082
1241	4	NSG2	0.007629948
1242	2	ADGRV1	0.007623896
1243	2	PBRM1	0.007623011
1244	4	DNAJA1	0.007614187
1245	2	GEN1	0.007608362
1246	4	ADD1	0.007599459
1247	2	LRRC17	0.007580036
1248	4	TOP1	0.007577449
1249	2	SCARA3	0.007562776
1250	4	ENSMMUG00000048888	0.007555123
1251	2	ENSMMUG00000001858	0.007538586
1252	2	ELAVL2	0.007516457
1253	2	NPM1	0.007510434
1254	4	CALU	0.007498713
1255	4	TMSB10	0.007488344
1256	2	PSMD2	0.007487146
1257	4	IPO5	0.007480639
1258	2	ELAVL3	0.007474827
1259	2	RPS16	0.007473656
1260	2	RPS3A	0.007472637
1261	4	H1FX	0.007467871
1262	4	KMT5A	0.007466461
1263	2	NCALD	0.007466148
1264	2	POLR2G	0.00746061
1265	2	TMED10	0.00745712
1266	2	MAGED2	0.007453796
1267	4	SELENBP1	0.007436694
1268	4	MLEC	0.007432174
1269	4	TAGLN2	0.007425831
1270	2	ABI2	0.007422981
1271	4	MMP15	0.007419667
1272	4	EPDR1	0.007403683
1273	4	NASP	0.007400775
1274	2	BBOX1	0.007394106
1275	2	TICRR	0.007386084
1276	4	ARHGAP33	0.007367457
1277	2	SLC38A3	0.007344981
1278	2	PDXK	0.007339954
1279	4	GRM3	0.007338652
1280	2	H1FX	0.007328863
1281	4	RAB10	0.007325288
1282	4	KDSR	0.007324839
1283	4	CCDC18	0.007323457
1284	4	ATP1A1	0.007319514
1285	2	FUBP1	0.007314738
1286	4	ENSMMUG00000005880	0.00730989
1287	2	UBE2H	0.007308851
1288	4	ANP32A	0.007300529
1289	2	SPRY2	0.00728691
1290	4	DLX2	0.007283979
1291	2	GPM6A	0.007283827
1292	4	ATP2B4	0.007275108
1293	2	HNRNPH2	0.00726875
1294	2	EPDR1	0.007263814
1295	2	FAM127A	0.007259634
1296	4	FAM110A	0.007247018
1297	4	ERBB3	0.007233436
1298	2	VDAC3	0.007228998
1299	2	DHCR7	0.007228334
1300	2	ENSMMUG00000000350	0.007227044
1301	2	NSG2	0.007225679
1302	4	TMEM259	0.007215866
1303	2	CLCN3	0.007210035
1304	2	RNF187	0.007198542
1305	4	LEPROT	0.007198271
1306	4	ENSMMUG00000010266	0.007196212
1307	2	ENSMMUG00000010266	0.007181031
1308	2	SLC6A1	0.007174338
1309	4	SYNCRIP	0.007169698
1310	4	TMOD2	0.007160655
1311	2	RPL9	0.007153952
1312	4	TMEM205	0.007149543
1313	4	BBX	0.007149507
1314	2	ABHD6	0.007148518
1315	4	LAMP2	0.007147585
1316	4	ND2	0.007146866
1317	4	NPDC1	0.007140995
1318	2	GALNS	0.007129807
1319	2	PBX3	0.007114265
1320	4	ENSMMUG00000055357	0.007109676
1321	2	LRRN2	0.007101241
1322	4	FABP5	0.007099427
1323	2	ATP6V0E1	0.007089488
1324	2	CHCHD2	0.007087867
1325	2	HSP90AA1	0.007081696
1326	4	LYN	0.007067524
1327	4	PDZD11	0.00706032
1328	4	ERP29	0.007055746
1329	4	ADCYAP1R1	0.007048963
1330	2	ACAD10	0.007040901
1331	2	NCL	0.007040111
1332	4	ENSMMUG00000038373	0.00703541
1333	2	NIFK	0.007034823
1334	4	ANXA6	0.007034569
1335	2	RBP1	0.007031878
1336	4	NFE2L1	0.00702712
1337	2	ATXN2	0.007026154
1338	2	HMGN3	0.007017452
1339	2	ILF3	0.007016674
1340	2	DNAJC25	0.007010707
1341	4	SPRY2	0.00700914
1342	4	PPP1CB	0.007003187
1343	4	LENG8	0.007001449
1344	4	ENSMMUG00000028699	0.006990054
1345	4	NPM1	0.006988228
1346	2	PDLIM5	0.006982676
1347	2	KHDRBS1	0.006976127
1348	4	IGFBP2	0.00697219
1349	4	ENSMMUG00000051566	0.006959137
1350	2	RPS3	0.006954427
1351	4	RUSC1	0.006948515
1352	2	CENPU	0.006946217
1353	4	TLE1	0.006945808
1354	2	FLNA	0.006937849
1355	2	HSPD1	0.006937147
1356	2	NFIC	0.006933532
1357	4	KCNA4	0.006929448
1358	4	SLC4A4	0.006927267
1359	4	AASDHPPT	0.006922532
1360	2	MARCKSL1	0.006921408
1361	2	ENSMMUG00000011604	0.006919896
1362	2	LGALS3	0.006917965
1363	4	COMMD3	0.006916933
1364	2	PGM1	0.006915761
1365	2	DEK	0.006915291
1366	4	PHF11	0.006914452
1367	4	B2M	0.006911779
1368	2	RPL12	0.006911517
1369	2	HACD4	0.006902423
1370	4	RRAGA	0.006895838
1371	4	ALDH3A2	0.006895494
1372	4	RPL6	0.006885075
1373	4	BCLAF1	0.006880712
1374	2	TMX1	0.006876042
1375	2	SKP1	0.006873132
1376	4	PSMB1	0.006867717
1377	4	IPO7	0.00684672
1378	2	BEX4	0.006846279
1379	4	ENKUR	0.006843884
1380	2	UBL3	0.0068414
1381	4	DMRTA2	0.006832449
1382	2	HNMT	0.006831492
1383	4	TUSC3	0.006814527
1384	4	ENSMMUG00000018491	0.006812666
1385	2	ENSMMUG00000023144	0.006809254
1386	4	BEX4	0.006805605
1387	4	RNASEH2B	0.006805166
1388	4	MAP1B	0.006804874
1389	4	NCL	0.006800607
1390	2	PGGHG	0.006791432
1391	4	LASP1	0.006791321
1392	2	RPL23	0.006790799
1393	4	MPHOSPH9	0.006789173
1394	2	GHITM	0.006788818
1395	4	ARGLU1	0.006781422
1396	4	PDIA6	0.006779746
1397	4	GPC4	0.006779681
1398	4	DESI2	0.006779363
1399	4	RHPN2	0.00677835
1400	4	PCM1	0.006774849
1401	4	GABPB1	0.006769716
1402	4	ITGB8	0.006765422
1403	2	LDOC1	0.006762962
1404	4	ENSMMUG00000060590	0.0067627
1405	2	ASPH	0.006759479
1406	2	TMEM131L	0.006749601
1407	4	WSB1	0.006743769
1408	2	DAAM2	0.006743032
1409	4	HNRNPK	0.006736603
1410	2	MCM5	0.00673623
1411	2	KDELR1	0.006729178
1412	4	ENSMMUG00000000671	0.006727296
1413	2	ENSMMUG00000061959	0.006724713
1414	2	RPL39	0.006724683
1415	4	ACTN1	0.006724614
1416	4	MSH2	0.006722965
1417	4	CASC4	0.006720157
1418	4	MYEF2	0.00671413
1419	4	EFNB2	0.006711993
1420	2	DCTN2	0.006698315
1421	4	FNBP1L	0.006693736
1422	2	VDAC1	0.006689609
1423	2	DDX17	0.006684827
1424	4	TOLLIP	0.006680892
1425	2	OLFM1	0.006680296
1426	4	TMEM123	0.006668648
1427	4	HNRNPA1	0.006663174
1428	2	HNRNPD	0.006649444
1429	4	LPAR1	0.006645524
1430	4	TMA7	0.006642306
1431	4	SEMA4A	0.00664148
1432	2	C1H1orf198	0.006640945
1433	4	NFIA	0.006640502
1434	4	COX2	0.006631669
1435	2	RNASEH2B	0.006626782
1436	4	PNRC2	0.006624377
1437	2	BORA	0.006619631
1438	2	TMEM47	0.006614252
1439	4	RPL10	0.006612092
1440	4	CPT1A	0.006604848
1441	4	ABHD4	0.006604114
1442	4	KIF1B	0.006603605
1443	4	CDCA7	0.006597708
1444	4	BEX1	0.006588907
1445	4	WASF3	0.006577234
1446	2	KIFBP	0.006574959
1447	2	ARHGAP33	0.006566615
1448	4	BNIP3L	0.006560586
1449	4	DNAJC1	0.006559783
1450	4	NCAN	0.006548779
1451	2	C15orf41	0.006537679
1452	4	VDAC3	0.006536892
1453	4	ENSMMUG00000054045	0.00653626
1454	4	PTTG1IP	0.006530008
1455	2	RAD23B	0.006529827
1456	2	SMTN	0.00652924
1457	2	GRAMD4	0.006526773
1458	4	CA12	0.006509153
1459	4	SNN	0.006508755
1460	2	ATP1B1	0.006494488
1461	2	ZEB2	0.006494121
1462	2	TTYH3	0.006490439
1463	2	GAD2	0.006488383
1464	4	SEPTIN9	0.006476366
1465	2	HNRNPK	0.006471953
1466	2	ZFHX4	0.006470485
1467	4	AKIRIN2	0.006468836
1468	4	ATP5MC2	0.006466882
1469	2	ARL6IP5	0.006462185
1470	2	KIAA0355	0.006461728
1471	4	UBB	0.006460668
1472	2	SELENBP1	0.006457867
1473	2	NID1	0.006456216
1474	2	CRYL1	0.006448786
1475	4	RPL13A	0.006435958
1476	2	MCM7	0.006429177
1477	4	COX7C	0.006426439
1478	4	RPL15	0.006417712
1479	2	ENSMMUG00000021246	0.006403852
1480	2	CA12	0.006399236
1481	2	C6H5orf49	0.006390803
1482	4	VEGFA	0.006390012
1483	4	ENSMMUG00000043771	0.006383426
1484	2	METRN	0.006373735
1485	4	RNF141	0.006373337
1486	4	RND3	0.006372955
1487	2	NLGN3	0.006362444
1488	2	RPL27A	0.006360483
1489	4	WSCD1	0.006355135
1490	2	GDI1	0.006353228
1491	2	VRK1	0.006351844
1492	4	GFRA2	0.006347073
1493	2	HSD17B11	0.006344048
1494	4	GNAO1	0.006320785
1495	4	ENSMMUG00000065238	0.006319266
1496	4	ENSMMUG00000019174	0.006315033
1497	2	PPP2R2B	0.006306746
1498	2	GNPDA1	0.006304015
1499	4	DIAPH3	0.00630393
1500	2	AGRN	0.006299942
1501	2	RFC1	0.006294908
1502	4	SRR	0.006294111
1503	4	GTF2H5	0.006292661
1504	4	DCTN3	0.006289728
1505	4	SMARCA4	0.006288005
1506	4	RPL22	0.006284902
1507	4	HSDL2	0.006284463
1508	4	SYNM	0.006280495
1509	4	HSD17B12	0.006279229
1510	2	SEMA4A	0.006274145
1511	4	ATP5F1E	0.006271462
1512	2	VCP	0.006268199
1513	2	STX12	0.006251512
1514	4	CMTM6	0.006248978
1515	2	DDAH2	0.006247037
1516	2	TYMS	0.006244704
1517	4	KPNB1	0.006241789
1518	2	ENSMMUG00000016898	0.00623993
1519	2	ATP2B4	0.006237327
1520	2	HSP90B1	0.006234185
1521	4	ATF6	0.006228981
1522	4	CSNK1E	0.006226767
1523	4	UCHL1	0.00620736
1524	4	MSI1	0.006207171
1525	2	SQSTM1	0.006205863
1526	2	RPL27	0.006205733
1527	2	TAGLN2	0.006205586
1528	2	ATP1A1	0.00620443
1529	4	PRPF40A	0.006203883
1530	2	LDHA	0.00620102
1531	2	NHP2	0.006196306
1532	2	UBE2E3	0.006186572
1533	2	RPS11	0.00618352
1534	2	WDR76	0.006169092
1535	2	ADD3	0.006168152
1536	2	PNRC2	0.006162826
1537	2	ND4	0.006160149
1538	4	ADGRV1	0.006152187
1539	2	ENSMMUG00000051566	0.006147549
1540	2	ARGLU1	0.006145626
1541	2	DLX1	0.006145495
1542	4	MORF4L2	0.006144399
1543	4	SCAMP2	0.006138813
1544	2	GPT2	0.006133209
1545	4	ATP5MC1	0.006129375
1546	2	ENSMMUG00000003501	0.006115167
1547	2	JUN	0.006112333
1548	2	XPNPEP1	0.006110037
1549	2	RPL8	0.006109764
1550	4	GGCT	0.006106605
1551	2	SKA2	0.006102439
1552	4	CCDC112	0.006102307
1553	4	ENSMMUG00000063198	0.006098557
1554	2	CFDP1	0.006098036
1555	4	AGRN	0.006097402
1556	4	ATP5IF1	0.006096939
1557	4	DYRK1A	0.006094243
1558	4	HDLBP	0.006088255
1559	4	NFIC	0.006088097
1560	2	ENSMMUG00000000671	0.006087244
1561	4	DNAJC25	0.006084276
1562	4	ACVR1	0.006081618
1563	4	PRDX5	0.006076974
1564	4	SSR3	0.006073541
1565	4	VRK1	0.006072225
1566	2	UBB	0.006070926
1567	2	ENSMMUG00000052609	0.00606746
1568	4	SORBS3	0.006065804
1569	2	MDH1	0.006060876
1570	2	FGFR1	0.00605821
1571	2	MPHOSPH8	0.006053813
1572	4	ARHGAP1	0.006053311
1573	2	DLX2	0.006048634
1574	4	TUBB3	0.006037959
1575	2	HS3ST1	0.006035069
1576	4	MYO1E	0.006030509
1577	2	ENSMMUG00000009289	0.006017956
1578	2	C1QBP	0.00601626
1579	2	KBTBD2	0.006016122
1580	4	RPL39	0.006014225
1581	2	INHBB	0.006013364
1582	2	FAM122B	0.006010949
1583	4	PPP2CB	0.006009487
1584	4	CTBP2	0.006008267
1585	4	UGDH	0.006006482
1586	2	ENSMMUG00000057449	0.006005089
1587	2	NRXN1	0.005995323
1588	2	ATF4	0.005992299
1589	2	CNRIP1	0.005991401
1590	4	IQSEC1	0.005984236
1591	2	TMEM51	0.005980692
1592	4	SNX5	0.005976521
1593	4	JUN	0.005975556
1594	2	CCNY	0.00596956
1595	4	YWHAZ	0.005963235
1596	2	ENSMMUG00000049324	0.005961709
1597	4	ATP5MC3	0.005961568
1598	4	RB1	0.005959286
1599	2	NASP	0.005950277
1600	4	CCT2	0.005949474
1601	2	ENSMMUG00000012419	0.005946805
1602	2	CCN1	0.005945638
1603	4	EXTL2	0.005945
1604	4	PGM2	0.005940878
1605	2	PRNP	0.005935097
1606	4	HNRNPC	0.00593025
1607	2	DDX5	0.005929769
1608	4	PDCD4	0.005926389
1609	4	DIXDC1	0.005923911
1610	2	ITGB8	0.00591861
1611	4	RPS11	0.005915798
1612	4	TRIR	0.005912521
1613	2	NCAPD2	0.005912468
1614	2	NGRN	0.005909445
1615	4	DZIP1	0.00590864
1616	4	RBM39	0.00589381
1617	4	TMBIM1	0.005892863
1618	4	RIT1	0.005891142
1619	2	TMEM123	0.005886978
1620	4	PDIA4	0.005885006
1621	4	ENSMMUG00000058755	0.005881739
1622	2	ENSMMUG00000043771	0.005880305
1623	4	ENSMMUG00000019238	0.005869905
1624	2	DIAPH3	0.005868127
1625	2	KPNB1	0.005867772
1626	2	PIF1	0.005865532
1627	4	GRIA1	0.005860659
1628	4	RPL27	0.00586025
1629	4	RPSA	0.005859745
1630	4	LRRC17	0.005855309
1631	2	TCF7L1	0.005855046
1632	4	MCM7	0.005854169
1633	2	AMOTL2	0.005842556
1634	2	RGMA	0.005841026
1635	2	RPL6	0.005834664
1636	2	PTPRM	0.005834632
1637	2	HNRNPLL	0.005832546
1638	2	UCP2	0.005831935
1639	2	TSPO	0.005829171
1640	4	RPL4	0.005824458
1641	4	RHNO1	0.005813588
1642	4	RAD23A	0.005805855
1643	4	PCLAF	0.005800523
1644	2	LRP10	0.005798766
1645	4	C2CD5	0.005796392
1646	2	ENSMMUG00000060590	0.005791331
1647	4	BAALC	0.005784509
1648	2	CTSB	0.005781189
1649	4	INHBB	0.005779614
1650	4	SNCA	0.005768102
1651	2	ENSMMUG00000029973	0.005761511
1652	4	RNF187	0.005750482
1653	2	PCLAF	0.005750441
1654	2	PAM	0.005746215
1655	2	UBA1	0.005745948
1656	2	ZMYND11	0.00574547
1657	4	C4H6orf120	0.005744412
1658	2	EEF1B2	0.005741093
1659	2	SPIN1	0.005739909
1660	4	ENSMMUG00000000752	0.005734084
1661	4	MIDN	0.005730954
1662	2	OCIAD1	0.005727316
1663	2	ENSMMUG00000062350	0.005721759
1664	4	HACD4	0.005719357
1665	4	BRK1	0.005717189
1666	2	CSNK1E	0.005716093
1667	4	LSAMP	0.005713321
1668	4	PBXIP1	0.005713133
1669	4	NHP2	0.005712982
1670	2	AKT1	0.005712729
1671	2	PDPN	0.005710996
1672	2	CDK16	0.005697827
1673	2	LRRC4B	0.005697151
1674	4	TOMM7	0.005689966
1675	4	ENSMMUG00000002320	0.005687689
1676	4	SFXN1	0.005686883
1677	2	GSTT2B	0.005686741
1678	4	TYMS	0.005686718
1679	2	NEUROD1	0.005685755
1680	4	SPRED2	0.005668211
1681	4	PREX1	0.00566723
1682	2	CTSL	0.005665122
1683	4	FLNA	0.005660636
1684	4	DGCR2	0.005659632
1685	2	FAU	0.005655454
1686	4	PRDX6	0.005654743
1687	2	PCDHGB5	0.005639038
1688	4	ENSMMUG00000053555	0.005636381
1689	2	PARK7	0.005636219
1690	4	RPL9	0.005633237
1691	2	AKIRIN2	0.005627912
1692	2	VAMP3	0.005625674
1693	2	HDLBP	0.005624599
1694	4	ZNF292	0.005624202
1695	4	NUCB1	0.005622646
1696	2	CSPG5	0.005619567
1697	4	ZNF664	0.005615322
1698	2	TMEM106B	0.005612352
1699	4	ETV5	0.005612287
1700	2	METAP2	0.005611464
1701	2	PAQR6	0.005609606
1702	2	ENSMMUG00000055357	0.005608319
1703	2	ERGIC1	0.005607714
1704	4	SCHIP1	0.005604863
1705	4	CTNNA1	0.005601846
1706	2	S100B	0.005600125
1707	2	ENSMMUG00000000752	0.005593174
1708	2	CLDND1	0.005592422
1709	4	CETN2	0.005590395
1710	2	MACIR	0.005587728
1711	2	ABHD4	0.005584822
1712	2	ENSMMUG00000028695	0.005581081
1713	4	ENSMMUG00000016898	0.005570075
1714	2	ERCC6L	0.005563978
1715	2	ENSMMUG00000048621	0.005563482
1716	2	RIT1	0.005560444
1717	2	ADH5	0.005559279
1718	4	PNN	0.005558483
1719	2	PAICS	0.005556497
1720	4	MTPN	0.005554435
1721	2	RPN2	0.005550942
1722	2	PTGES3	0.005549874
1723	4	SURF4	0.005547084
1724	4	BORA	0.005545386
1725	2	CAND1	0.005535493
1726	2	SAE1	0.005523442
1727	4	TCF7L1	0.005523078
1728	2	PSMD3	0.0054966
1729	4	GABARAPL1	0.005495732
1730	2	DAB1	0.005493253
1731	2	ENSMMUG00000061824	0.005485345
1732	4	EIF4H	0.005484929
1733	4	SNU13	0.005482945
1734	2	FDFT1	0.005478695
1735	2	PLD3	0.005474602
1736	2	XRCC5	0.005473814
1737	2	ENKUR	0.005466259
1738	2	TCP1	0.005461713
1739	4	AIG1	0.005461106
1740	4	CUTA	0.005449694
1741	4	GPR137B	0.005449668
1742	2	SWAP70	0.00544914
1743	2	LDB2	0.005448972
1744	2	MPHOSPH9	0.005448221
1745	4	CEP192	0.00544814
1746	2	ARF1	0.005441804
1747	2	WASF3	0.005440304
1748	4	HEBP1	0.005434252
1749	2	IFI27L2	0.005427266
1750	4	CHCHD2	0.005426993
1751	2	PRDX2	0.005424681
1752	2	CTCF	0.005424337
1753	2	EIF1AX	0.005416061
1754	2	SMARCA5	0.005415638
1755	2	PSME3	0.005414485
1756	4	RPS20	0.00541382
1757	2	STIL	0.00541192
1758	2	TPM3	0.005408997
1759	2	ATF6	0.005408047
1760	2	EOMES	0.005404805
1761	2	RPL35A	0.005404758
1762	2	DTYMK	0.005403322
1763	2	PDHB	0.005400443
1764	2	NDUFB2	0.005397812
1765	4	DAAM2	0.005397361
1766	2	ASNSD1	0.005397252
1767	2	PRDX4	0.005396161
1768	4	GRIK2	0.005393535
1769	4	RPS3	0.00538909
1770	4	SRSF2	0.005388536
1771	4	SNX12	0.005387612
1772	2	ENSMMUG00000041188	0.005386334
1773	2	RPS7	0.005377713
1774	2	EIF3I	0.005374761
1775	2	PGM2	0.005373162
1776	4	CSE1L	0.005372323
1777	2	MTCH1	0.005371778
1778	2	ENSMMUG00000042762	0.005362784
1779	2	PRDX6	0.005359331
1780	2	HNRNPC	0.005359105
1781	4	CRYM	0.005357525
1782	2	TXNDC12	0.005357238
1783	4	CENPW	0.005347103
1784	2	MTHFD1	0.005345765
1785	4	RAB11B	0.005342789
1786	2	KCTD15	0.005342651
1787	2	CENPN	0.005341822
1788	2	PRKDC	0.005340139
1789	2	SALL2	0.005337752
1790	2	DDX39B	0.005337275
1791	4	ENSMMUG00000006855	0.005336632
1792	4	ELOA	0.005335251
1793	2	DNAJB1	0.005329344
1794	2	ABHD2	0.005328019
1795	4	SF3B1	0.005327922
1796	4	CELF2	0.00532566
1797	2	ENSMMUG00000060923	0.005324767
1798	4	ACTB	0.005320209
1799	4	ENSMMUG00000016621	0.005314611
1800	4	CYB5B	0.005308471
1801	2	TIGAR	0.005307773
1802	2	GLG1	0.005305352
1803	2	SLITRK2	0.005303958
1804	2	P4HB	0.005302931
1805	4	RRM2	0.005302498
1806	2	HAT1	0.005295951
1807	2	GGH	0.005292788
1808	4	SLC25A4	0.005287184
1809	2	TSC22D1	0.005286173
1810	2	SH3BGRL	0.005281686
1811	2	CBX2	0.005277665
1812	4	ENSMMUG00000052035	0.005275294
1813	4	RPS7	0.005274576
1814	4	MAP4K4	0.005273435
1815	2	B2M	0.005273388
1816	4	CDO1	0.005270766
1817	2	HYLS1	0.005266493
1818	2	SUPT4H1	0.005266013
1819	2	RPS29	0.005265934
1820	4	PSMC2	0.005265077
1821	4	EEPD1	0.005260541
1822	2	CCDC88A	0.005256491
1823	2	ENSMMUG00000053555	0.005256182
1824	2	ANP32B	0.005252949
1825	4	GPD1L	0.005250883
1826	2	ENSMMUG00000006965	0.005247037
1827	4	SNRPD1	0.005246715
1828	4	TMEM9B	0.005246672
1829	2	DCN	0.005241525
1830	2	TLK1	0.005235464
1831	4	IFNAR1	0.005234984
1832	4	CAP2	0.005233292
1833	2	ENSMMUG00000019174	0.005224752
1834	4	SP9	0.0052226
1835	2	ND3	0.00522224
1836	4	SMARCD1	0.005220951
1837	2	DHRS7	0.005219113
1838	2	IFT57	0.005218724
1839	2	RHBDD2	0.005218118
1840	2	PGK1	0.005213924
1841	4	ENSMMUG00000055584	0.005213721
1842	4	DLX1	0.005212294
1843	4	ITM2A	0.005211225
1844	2	EPRS1	0.005209273
1845	2	TMEM248	0.005203262
1846	2	MCL1	0.005201639
1847	2	NCKAP5	0.005199265
1848	4	XPNPEP1	0.005197722
1849	2	PPP2R5A	0.005195887
1850	2	TSPYL1	0.005195068
1851	2	ARHGDIA	0.005193808
1852	4	MFSD14B	0.005191996
1853	4	MBOAT7	0.005186785
1854	2	GNAQ	0.005184334
1855	4	SMC3	0.005183781
1856	4	ZBED5	0.005183461
1857	2	CTNNA1	0.005182527
1858	2	CDC42	0.005179332
1859	2	CDCA7L	0.005178388
1860	4	ZRANB2	0.005177052
1861	4	RBM25	0.005172765
1862	2	RPL31	0.005172038
1863	2	FERMT2	0.005171034
1864	2	NCAPG2	0.005167988
1865	4	SDCBP	0.00516046
1866	4	PRSS53	0.00516006
1867	4	CEP135	0.005158543
1868	2	FKBP14	0.005157044
1869	4	TUFM	0.00515067
1870	4	ZMAT3	0.005150591
1871	2	ENSMMUG00000065362	0.005144457
1872	4	TNFAIP1	0.005143554
1873	2	ENSMMUG00000052127	0.005141762
1874	2	BRD4	0.005141259
1875	4	RAB7A	0.005141237
1876	4	DBN1	0.005138698
1877	4	ENSMMUG00000011408	0.005136327
1878	4	ENSMMUG00000030408	0.005132086
1879	4	VDAC2	0.005131995
1880	2	SLC25A1	0.005130286
1881	2	FAM120A	0.005128552
1882	2	RRP15	0.005123304
1883	4	RGMA	0.005121956
1884	2	ENSMMUG00000003073	0.005119669
1885	4	CAPZB	0.00511769
1886	2	ENSMMUG00000028699	0.005117104
1887	2	PHKB	0.005110972
1888	2	DYNLL1	0.005104448
1889	2	GLUL	0.005103559
1890	2	GNL3	0.005099329
1891	4	COX6C	0.005096959
1892	4	FIS1	0.005095833
1893	4	STIP1	0.005093644
1894	2	PDAP1	0.005092861
1895	2	SLC4A4	0.005092196
1896	4	ARMCX3	0.005084589
1897	4	CRYZ	0.005084104
1898	2	SLC39A7	0.005081147
1899	2	TOB2	0.005080898
1900	4	APEX1	0.005080388
1901	2	SLC25A23	0.005079906
1902	2	ENSMMUG00000002273	0.005072457
1903	4	DAB1	0.005068085
1904	4	HNRNPH2	0.005065509
1905	2	FEN1	0.005062172
1906	2	TTC19	0.005061532
1907	2	MYO10	0.005059938
1908	4	MPHOSPH8	0.005058931
1909	4	EIF3H	0.00505758
1910	2	ARID4B	0.005052904
1911	2	SEM1	0.005050969
1912	2	PRRC2B	0.005045985
1913	2	RPS8	0.005044016
1914	2	CERK	0.005036784
1915	4	ZNF581	0.005036504
1916	4	LRRN2	0.005027902
1917	2	MAPK11	0.005025704
1918	2	FAM53C	0.00502564
1919	4	FUBP1	0.005023327
1920	4	MTHFD1	0.005018614
1921	2	RASSF2	0.005012832
1922	4	VCAN	0.005009389
1923	2	SREBF1	0.005009239
1924	2	PTP4A1	0.005008428
1925	2	KCNA4	0.005008243
1926	2	YWHAG	0.005006068
1927	4	ENSMMUG00000016909	0.005001762
1928	2	ENSMMUG00000011798	0.004999579
1929	2	PTTG1IP	0.004999501
1930	4	RPS8	0.004996241
1931	4	NDUFC2	0.004995045
1932	4	PPIC	0.004984233
1933	4	GNPDA1	0.004983121
1934	2	HNRNPA1	0.004982482
1935	4	CLK2	0.004979103
1936	4	CCP110	0.004976352
1937	4	DBNL	0.004968797
1938	4	RPL27A	0.00496394
1939	4	B3GALNT1	0.004963843
1940	4	LGI2	0.004960202
1941	4	EIF1AX	0.00495899
1942	4	HSPA5	0.004956658
1943	2	GABARAP	0.004954579
1944	4	TCEAL4	0.004952038
1945	4	PSMB5	0.004950154
1946	4	ENSMMUG00000062350	0.004948854
1947	2	ZNF93	0.004948247
1948	4	CTDSP2	0.004943787
1949	2	PNISR	0.004943257
1950	4	GRAMD4	0.004943113
1951	4	CTCF	0.004942522
1952	4	RRP15	0.004939521
1953	4	CPD	0.004939309
1954	4	TTC19	0.004934578
1955	2	LCORL	0.004932527
1956	4	RPL5	0.004931408
1957	4	USP1	0.004929749
1958	2	DYNC1I2	0.00492784
1959	4	PREX2	0.004920049
1960	4	TMEM59L	0.004918688
1961	4	ENSMMUG00000053146	0.004918492
1962	2	SRR	0.004916002
1963	2	CREB5	0.004911052
1964	2	SMARCC1	0.004904588
1965	2	ND2	0.004902863
1966	2	SQLE	0.004901647
1967	2	DZIP1	0.004900189
1968	4	PPP2R3C	0.004899986
1969	2	TRA2B	0.004899908
1970	4	GNG3	0.004891447
1971	4	RBBP4	0.004891309
1972	2	UBE2D3	0.004889315
1973	2	YWHAH	0.004887083
1974	4	SRRT	0.004883479
1975	2	URM1	0.004882325
1976	2	ENSMMUG00000020073	0.004880364
1977	2	ENSMMUG00000030465	0.004874465
1978	2	U2SURP	0.004870842
1979	4	USP11	0.004868675
1980	2	CEMIP2	0.0048671
1981	4	PFKL	0.004864194
1982	4	IFI27L2	0.004859038
1983	4	NCAM1	0.004859004
1984	4	METTL3	0.004855788
1985	2	SNX12	0.004852311
1986	4	TCEAL9	0.004846667
1987	2	LRRC3B	0.004845619
1988	4	B4GAT1	0.004844861
1989	2	EIF5B	0.004843602
1990	2	RDX	0.004843335
1991	2	SCAF11	0.004843243
1992	2	ADCY2	0.004841694
1993	2	CAPZB	0.004838804
1994	2	SRPRB	0.004837204
1995	4	GNPTAB	0.004836879
1996	4	ATF7IP	0.004833101
1997	2	EIF1B	0.004828353
1998	2	PCNA	0.0048274
1999	4	ID2	0.004824322
[truncated: 46,667 more rows]
