# Supplementary material for: Temporal transcriptomic dynamics in developing macaque neocortex
Source: eLife. 2024 Feb 28;12:RP90325. doi: 10.7554/eLife.90325 (PMC10911584; doi:10.7554/eLife.90325)
Supplement: Supplementary file 3. [file elife-90325-supp3.csv]

	feature_id	from	to	importance
1	HNRNPU	1	4	0.0395028867141425
2	SRP9	4	3	0.0357452321903854
3	TUBB	1	4	0.0354141864720835
4	RPS8	4	3	0.0353276730900504
5	CALM3	1	4	0.0350859319187992
6	RPS14	4	3	0.0341624021716122
7	ENSMMUG00000013429	1	4	0.0334575912104487
8	RPLP1	4	3	0.0327633930291908
9	CDC42	4	3	0.0325148481392252
10	RBX1	4	3	0.0321800267494582
11	TPT1	4	3	0.0320363000801396
12	TUBB2B	4	3	0.0316756451706385
13	TRIM72	4	3	0.0315308927137774
14	ARF1	4	3	0.0312604887888717
15	JPT1	4	3	0.0310013330629015
16	ACE	4	3	0.0309300193959787
17	ENSMMUG00000001858	1	4	0.0307529354149676
18	ENSMMUG00000010266	1	4	0.03061281154429
19	RPS23	4	3	0.0302556840856484
20	NARS1	4	3	0.0300806184119271
21	ZMYND11	4	3	0.0299251990020158
22	GOLGA4	4	3	0.0294972459050085
23	ACTG1	1	4	0.0294761026753114
24	DDAH2	4	3	0.0292202976193644
25	IGFBP2	1	4	0.0291242110503768
26	ENC1	1	4	0.0291168309044006
27	RPS8	1	4	0.0290707538895962
28	RPS18	4	3	0.0290435808368566
29	ACTG1	4	3	0.0289935041669611
30	FYN	1	4	0.0289581535055801
31	RPL5	4	3	0.0288512982452386
32	GTF2I	1	4	0.0288343924475128
33	SRSF6	4	3	0.0287605321196313
34	YWHAE	1	4	0.0285730166896179
35	CTNNB1	4	3	0.0284925720423908
36	SRP14	4	3	0.0283096330884432
37	CAPRIN1	4	3	0.028272924423307
38	TCP1	1	4	0.0280423155603023
39	MIDN	4	3	0.0279861802888379
40	GAPDH	1	4	0.0279359514696806
41	RPS23	4	2	0.0279036302138398
42	RAB2A	4	3	0.0277757323322979
43	ENSMMUG00000010266	4	3	0.0276978474872005
44	EIF3I	4	3	0.0275652744158885
45	SLC29A1	1	4	0.0274694185938536
46	WSB1	4	3	0.0274453851254199
47	RPL23	4	3	0.0274144323773641
48	DPYSL2	1	4	0.0273769959589422
49	PTOV1	4	3	0.0272264079222619
50	SUB1	4	3	0.0271618056976029
51	HNRNPR	1	4	0.0271375155745555
52	ENSMMUG00000058755	1	4	0.027080575440566
53	ENSMMUG00000049324	1	4	0.0270778758762475
54	ILF3	4	3	0.0270373849564646
55	SKP1	1	4	0.0270042579906681
56	TTC3	1	4	0.0269924846801788
57	RBM8A	4	3	0.0268996477237106
58	NDUFA5	4	3	0.0267605375655178
59	CCT5	1	4	0.0267451727928888
60	ACO2	4	3	0.0266752459200007
61	PABPC1	1	4	0.0266730297456665
62	ADAR	4	3	0.0265793267014433
63	RPS14	1	4	0.0265590388302925
64	MATR3	4	3	0.026510012170414
65	RAD21	4	3	0.0264869754425103
66	RPS29	1	4	0.0264476429317362
67	OCIAD1	4	3	0.0264375056801174
68	OLFM2	1	4	0.0264127780931646
69	MARCKSL1	1	4	0.0264062658909591
70	CLIC4	4	3	0.026402739207394
71	U2AF2	1	4	0.0263975642065143
72	RPL27A	1	4	0.0263273804027007
73	PCLO	4	3	0.0262564437215523
74	FOXG1	1	4	0.0262128550405038
75	RACK1	4	3	0.026201929060264
76	FOS	1	4	0.0260749985404604
77	HNRNPH2	1	4	0.0260269090835172
78	GDI2	4	3	0.0260201508716664
79	PNISR	4	3	0.0259888814921318
80	RPL8	1	4	0.0258661750018703
81	MARCHF6	4	3	0.0258254603402852
82	DNAJB6	4	3	0.0256982119364174
83	UCHL1	1	4	0.0256884478659917
84	JPT1	4	2	0.0256351517681861
85	MLLT11	1	4	0.0255599424982902
86	ABCD3	1	4	0.025550485032159
87	HSBP1	4	3	0.025547698373103
88	ENSMMUG00000039070	1	4	0.0254983792251492
89	TSC22D1	1	4	0.0254862512122589
90	GTF2H5	4	3	0.0254418534118557
91	MED19	4	3	0.0254362489120985
92	MLF2	4	2	0.0254137178472343
93	UCKL1	4	3	0.0253994045206704
94	TMSB10	4	3	0.025379211284786
95	RPS7	4	3	0.0253571214434793
96	SMPD3	4	3	0.0253146318800722
97	TUBB	4	3	0.0252845022385638
98	FTH1	1	4	0.0252436209717729
99	MYL6	1	4	0.0252185377085686
100	APLP2	4	3	0.025212671284308
101	YWHAE	4	2	0.0251759961522243
102	STMN1	1	4	0.025137870597162
103	SEC31A	4	3	0.0251171760216031
104	CFDP1	4	3	0.0250566904618745
105	RTN1	4	3	0.0250486493571625
106	IDH2	4	3	0.0249568913911447
107	RPL6	4	3	0.0249498732942938
108	RPS20	4	3	0.0249483343662058
109	RBX1	1	4	0.0249367288191571
110	HNRNPD	4	3	0.0248458214823953
111	TSPAN3	4	3	0.0247749637764009
112	ATP1B1	4	3	0.0247238206748224
113	TUBA1A	4	2	0.024663543957601
114	RPLP2	4	3	0.0246595928647191
115	DHX15	4	3	0.0246451419323672
116	CCT8	4	2	0.0246377765383261
117	SMARCC1	4	3	0.0246213925998672
118	SRP14	1	4	0.0245660698419255
119	ENSMMUG00000060923	1	4	0.0245298198020692
120	FNBP1L	1	4	0.0245235365829536
121	APLP2	1	4	0.024517335245001
122	ZNF33A	4	3	0.0244373481009898
123	NFIA	1	4	0.024328130093825
124	RNF145	4	3	0.0243218246698947
125	ARF1	4	2	0.0242729741657168
126	ENSMMUG00000006293	4	3	0.0242657700514517
127	ACOT7	4	3	0.0242448787362372
128	SLC29A1	4	3	0.0242246785731276
129	SERBP1	4	2	0.0242063892892797
130	SOX4	4	3	0.0241842111512905
131	ATRX	4	3	0.0241181551611544
132	TCEAL4	1	4	0.0241092760254827
133	L1CAM	1	4	0.0240708489288906
134	HSP90AA1	4	3	0.0240572029976247
135	RPS21	4	3	0.0240027169478702
136	RAB6A	4	3	0.0239996134421407
137	PPP1R18	1	4	0.0239971769224747
138	KPNB1	1	4	0.0239454704731727
139	GAPDH	4	3	0.0239423573866776
140	ENSMMUG00000059641	1	4	0.0239084413354563
141	LEPROTL1	1	4	0.0239017523381194
142	TSC22D1	4	3	0.0238601840074371
143	HNRNPA2B1	1	4	0.0237789854438063
144	RBM25	4	3	0.0237568587478929
145	PRKAR1A	1	4	0.0237278468359372
146	HNRNPK	4	3	0.023719031559083
147	ABI2	4	3	0.0237187450477217
148	TPT1	1	4	0.0236746207910728
149	TAF7	4	3	0.0236506783817662
150	PSMC1	1	4	0.0236222260010479
151	ENSMMUG00000062350	4	3	0.0236006180445601
152	H2AFY	1	4	0.0235824536752762
153	LRRN1	4	3	0.0235769093359053
154	INA	4	3	0.0235762339385409
155	PCMT1	1	4	0.0235608671306527
156	COX3	4	3	0.0235607079561709
157	ENSMMUG00000015563	4	3	0.0235523174811885
158	CGGBP1	4	3	0.0235341753288226
159	TUBB4A	4	3	0.023499430223308
160	APC2	4	3	0.0234888794851825
161	RPL32	4	3	0.0234760180797141
162	ENSMMUG00000021075	4	2	0.0234622747068047
163	SEPTIN5	4	3	0.0234395467425084
164	NONO	4	3	0.0234321590131557
165	CFL1	1	4	0.023417453226065
166	MAP1B	1	4	0.0234089383637418
167	ENSMMUG00000058755	4	3	0.0234031388896866
168	TTC3	4	3	0.0234008474471114
169	RPS7	1	4	0.0233909447054189
170	CAMLG	1	4	0.0233888228945422
171	ENSMMUG00000060590	4	3	0.0233806610230002
172	TUBA1A	4	3	0.0233795095825815
173	PSENEN	4	3	0.0233553217950111
174	ATP6	4	3	0.0233237061216698
175	ND3	4	3	0.0233086272869811
176	CCT6A	1	4	0.0233017734192418
177	RAB6A	1	4	0.0232967707424065
178	SMARCE1	4	2	0.0232877797381734
179	DDX17	4	3	0.0232800046429691
180	SMC1A	1	4	0.0232767077408869
181	OLFM1	1	4	0.0232746816447746
182	RAN	4	3	0.0232304534675146
183	CAMK2N1	4	2	0.0231578723099767
184	ENSMMUG00000016009	4	3	0.0231425798989232
185	SAP130	1	4	0.0230996400363098
186	PSMB5	4	3	0.0230854875401221
187	TSC22D1	4	2	0.0230749917061801
188	HNRNPU	4	3	0.0230548674162401
189	HNRNPR	4	3	0.0230435140794536
190	AKAP9	4	3	0.0230423984517585
191	ATP5F1E	4	2	0.0230168156687924
192	EIF4G2	1	4	0.0230068514835466
193	AASDHPPT	4	3	0.0230003747338164
194	ACTG1	4	2	0.0229893689560449
195	NIPBL	1	4	0.0229880127442793
196	C16H17orf49	1	4	0.0229796795911966
197	ENSMMUG00000064232	4	3	0.022979614063297
198	ENSMMUG00000052424	1	4	0.0229768601739445
199	ITM2B	4	3	0.0229652078177772
200	BCL2L2.PABPN1	4	3	0.0229547555135775
201	CCT8	1	4	0.0229394784184556
202	LUC7L3	4	3	0.0229119902627126
203	NUDT3	1	4	0.0229029684051901
204	PAFAH1B2	4	2	0.0228969368791113
205	CCT4	1	4	0.0228934161080901
206	YWHAB	4	3	0.0228491887395621
207	DNAJC9	4	3	0.0228459576783128
208	FAU	1	4	0.0228310291138961
209	NUDT3	4	3	0.0228247224761057
210	SP4	1	4	0.0228012157432973
211	ARHGAP5	1	4	0.0227986419106408
212	MIDN	1	4	0.0227901581486912
213	ENSMMUG00000065362	1	4	0.0227473013481023
214	SCD5	1	4	0.0226937544453291
215	SMARCC2	1	4	0.0226917126443408
216	CPSF6	4	3	0.0226900825981263
217	ACTR3	4	3	0.0226888465050175
218	STRAP	4	3	0.0226617661715213
219	HGSNAT	4	3	0.0226427690002667
220	NAB2	4	3	0.0226368391432602
221	YWHAG	1	4	0.0225945748123653
222	ENSMMUG00000061824	4	2	0.0225863136004617
223	COPS7B	4	3	0.0225677651043949
224	CLIP3	4	3	0.0225519537493226
225	RPL22	1	4	0.0225336624394124
226	RPL39	4	2	0.0225332407973453
227	SLC38A1	4	3	0.0225122539240644
228	PER1	4	3	0.022511654652767
229	RPS28	1	4	0.0224884350470854
230	KAT6B	1	4	0.0224547675512479
231	ENSMMUG00000050293	1	4	0.0224544488481429
232	HNRNPH3	4	3	0.0224401178701081
233	RRAGA	1	4	0.0224210373121127
234	ENSMMUG00000060590	1	4	0.0223924913169
235	HINT1	4	2	0.0223847363990904
236	PAFAH1B1	4	3	0.0223772403810906
237	ZRANB2	4	3	0.022367008270714
238	HSPA8	4	3	0.022365165833432
239	CRMP1	1	4	0.0223641354949451
240	EIF4H	4	3	0.0223621154737646
241	UBE2E3	4	3	0.0223523966333889
242	CCNG2	1	4	0.0223324297465344
243	HECTD1	4	3	0.0223123222925724
244	RPL39	4	3	0.0223082475021093
245	EIF4G2	4	3	0.0222961442094084
246	HP1BP3	4	3	0.0222874538924515
247	EIF4A2	1	4	0.0222809698960713
248	SREBF2	4	3	0.022269009088572
249	CLTC	4	3	0.0222614702109623
250	COPS2	1	4	0.0222561971772202
251	SCARB2	1	4	0.0222511846173232
252	FAM3C	4	3	0.0222458358041796
253	RNF187	1	4	0.0222413263067682
254	ENSMMUG00000065246	1	4	0.0222287146625132
255	DBN1	1	4	0.0222078326243264
256	ZKSCAN1	4	3	0.022190221965073
257	ENSMMUG00000003073	1	4	0.0221853487852487
258	COPZ1	1	4	0.0221834646178195
259	ENSMMUG00000005593	1	4	0.0221594872067449
260	PPDPF	1	4	0.0221395694747941
261	ANKRD12	4	3	0.0221164652983134
262	PFDN2	4	3	0.0220781930536092
263	RNF10	4	3	0.0220688726107659
264	CORO2B	4	3	0.0220628052033305
265	RSRC2	1	4	0.0220393914024433
266	PLEKHO1	4	3	0.0220294398297381
267	UBA1	1	4	0.0220287291078258
268	CALR	4	2	0.0220235147378649
269	SF3A2	1	4	0.0220209245188978
270	CCT4	4	3	0.0220125339018188
271	CHMP2A	1	4	0.0220027234815405
272	HNRNPA1	4	3	0.0219950429310154
273	ZNF706	4	3	0.0219267875406068
274	MAZ	4	3	0.0219167854742662
275	RBM14	1	4	0.0218888209184721
276	SOS1	1	4	0.0218875870319483
277	RPL4	4	2	0.0218873813642853
278	SETD5	4	2	0.0218754676922494
279	ENSMMUG00000049151	1	4	0.0218599132885837
280	SLC39A7	4	3	0.0218463122442966
281	NFIX	4	3	0.0218462496012371
282	PREPL	4	3	0.0218403260656015
283	NR2F1	4	3	0.0218365909216038
284	RPS6	4	3	0.0218349304304305
285	MAPK6	4	3	0.0218310806031373
286	RBM14	4	3	0.0218135794457294
287	RBBP4	4	3	0.0217941667202943
288	KPNB1	4	2	0.0217911308484927
289	ENSMMUG00000029987	1	4	0.0217840046815078
290	RNF187	4	3	0.0217376069735934
291	TIA1	4	2	0.0217335296956897
292	RPLP2	1	4	0.021728021832822
293	MYL12B	4	3	0.0217249193441052
294	NOP56	4	3	0.0217076959760476
295	RPL38	4	3	0.0217008133727973
296	CELF3	4	3	0.0216898075167588
297	ATP5MC2	4	3	0.0216847806306734
298	CHRDL1	4	3	0.0216714038934706
299	PTP4A1	4	3	0.0216636462999447
300	EZH2	1	4	0.021662344851675
301	SLC35E2	1	4	0.0216614722560869
302	ND3	4	2	0.0216519675467351
303	C2H3orf14	4	3	0.0216310390922779
304	ATXN7L3B	4	3	0.0216307970875138
305	ITSN1	1	4	0.0216225992272988
306	RAB5B	1	4	0.0215909179398696
307	RPS6	1	4	0.0215694152576651
308	BAZ2B	4	3	0.0215427618379408
309	ARG2	1	4	0.0215097693034004
310	DAAM1	4	3	0.0215021407581491
311	ENSMMUG00000015563	4	2	0.0214953847808385
312	SEC11C	4	3	0.0214924120712125
313	NMT2	4	3	0.0214785454524557
314	ENSMMUG00000016278	4	3	0.0214713826685298
315	PNN	4	3	0.021466215793321
316	STMN1	4	2	0.0214609118151255
317	ENSMMUG00000012140	4	3	0.0214556989276075
318	ENSMMUG00000039070	4	3	0.021429253114236
319	VTA1	1	4	0.0214145047884339
320	USP10	4	3	0.021400204455634
321	TCF3	1	4	0.0213898958977962
322	ZC3H11A	4	3	0.0213834901221493
323	ENSMMUG00000064551	4	3	0.021383305306073
324	C18H18orf32	4	2	0.0213702998356084
325	YWHAE	4	3	0.0213696244486379
326	ENSMMUG00000006965	1	4	0.0213600329651852
327	YWHAZ	1	4	0.0213503158955427
328	TMEM184C	4	3	0.0213499918169562
329	RPL37A	4	3	0.0213143312876477
330	ACTB	4	3	0.0212645752902663
331	APC	4	2	0.0212515318971759
332	KTN1	4	2	0.0212173107064998
333	ATP6	1	4	0.0211848548534397
334	GABARAP	1	4	0.0211813749327071
335	RPL39	1	4	0.0211679917956233
336	PPP2R3C	1	4	0.0211663889108739
337	DAZAP1	4	2	0.0211612057738056
338	RNF41	4	3	0.0211607679454309
339	KDM6B	1	4	0.0211590932502046
340	RPS11	4	3	0.0211471445942794
341	CBX3	4	3	0.0211369166179043
342	SOD1	4	3	0.0211359272290278
343	TCEAL4	4	3	0.0211279573097263
344	ENSMMUG00000059988	1	4	0.0211265335797087
345	NUCKS1	4	3	0.0211240813543884
346	RPS28	4	2	0.0211055087653187
347	MLF2	4	3	0.0210984197629085
348	TUBB3	4	2	0.0210927421924026
349	ENSMMUG00000006965	4	3	0.0210803567435072
350	AP3S1	4	2	0.0210732074399599
351	FIS1	1	4	0.0210556772546146
352	DDX39B	1	4	0.0210516502800321
353	UBE2K	4	3	0.0210468947510145
354	HNRNPK	1	4	0.0210430288643796
355	CD200	4	3	0.021020003619957
356	ENSMMUG00000056654	1	4	0.0210071531058553
357	PSMD14	1	4	0.021004439850392
358	CKB	1	4	0.021003463437356
359	HNRNPA0	4	3	0.0209954502349102
360	ACOT7	1	4	0.0209867439158535
361	TMEM183A	4	3	0.0209765592569501
362	CERS6	1	4	0.0209676162614373
363	HDGF	4	3	0.020940004453424
364	TMBIM6	1	4	0.0209248574918593
365	NGRN	1	4	0.020916748007477
366	PRPF38B	4	3	0.0208988249848199
367	SNN	1	4	0.0208949414525941
368	OAZ2	4	3	0.0208923117877721
369	PDS5B	4	3	0.0208919331247943
370	SYT5	4	3	0.0208803349658867
371	SSR3	4	3	0.0208700673936397
372	NOL11	4	3	0.0208545631935551
373	COPS8	4	2	0.020854487502891
374	ASAP2	4	3	0.0208426056686612
375	DNAJA1	1	4	0.0208352399854712
376	RPL38	1	4	0.0208296257145841
377	ENSMMUG00000014256	1	4	0.0208293235784681
378	HSPA8	4	2	0.0208207039463765
379	NUDC	4	2	0.0207992151514819
380	ATP5IF1	4	2	0.0207927699832388
381	RPL23A	4	2	0.0207893542461083
382	ZBTB18	4	3	0.0207510330042837
383	EIF5B	4	3	0.020747608072161
384	SKA2	1	4	0.0207430646166993
385	SFPQ	1	4	0.0207294963672163
386	RBFOX2	4	3	0.0207287107704226
387	CFL1	4	3	0.0207156256616466
388	GPR137	1	4	0.0207135480182648
389	PRRC2B	1	4	0.0207119842169797
390	H2AZ2	1	4	0.0207038313272877
391	ATN1	1	4	0.0206961705571666
392	GRIA3	4	3	0.0206934049651275
393	XRCC6	1	4	0.0206692847864037
394	CPNE1	1	4	0.0206604077556212
395	FKBP8	4	3	0.020656015369827
396	CCT5	4	3	0.0206417538151461
397	COX8A	4	2	0.0206261131999611
398	EEF2	1	4	0.0206184405755562
399	TOP2B	4	3	0.0206116273724664
400	KDM5B	1	4	0.0205996902001127
401	SUMO3	1	4	0.0205924933330473
402	ATP5F1E	4	3	0.0205908622938865
403	ENSMMUG00000046228	1	4	0.0205807086533512
404	RACK1	4	2	0.0205762318400458
405	CD200	1	4	0.0205630894753265
406	SYNGAP1	4	3	0.0205487859416996
407	HUWE1	4	3	0.0205444144032757
408	FAM171A1	4	3	0.0205415433562741
409	STMN1	4	3	0.0205310575893258
410	ENSMMUG00000001645	4	3	0.0205207356967478
411	PAFAH1B3	1	4	0.0205022075443273
412	LEPROTL1	4	3	0.0205005620935677
413	DYNC1LI2	1	4	0.0204792367148035
414	MLLT11	4	3	0.0204709064114242
415	IWS1	1	4	0.0204701229443802
416	SEC11C	1	4	0.020469806990467
417	KMT5B	4	3	0.0204663200614445
418	ENSMMUG00000019174	4	3	0.0204632713370825
419	UBE2R2	1	4	0.0204552885275219
420	PRDX2	4	3	0.0204470191628292
421	GSPT1	1	4	0.0204407179991886
422	ARF5	4	2	0.0204370707632723
423	SNX6	4	3	0.0204345119395488
424	FAM172A	1	4	0.0204330794954949
425	CCNH	4	3	0.0204316528618099
426	TAGLN3	4	3	0.0204294106162933
427	UHRF2	1	4	0.0204267968228116
428	SBDS	1	4	0.0204101508469768
429	SCHIP1	1	4	0.0203900052950094
430	STT3B	1	4	0.0203874808764678
431	WDR82	4	2	0.020381555816907
432	SREBF2	1	4	0.0203483946087357
433	TOPORS	1	4	0.020346224788211
434	ENC1	4	3	0.02028080134044
435	MSMO1	4	3	0.0202747510593724
436	CYFIP2	1	4	0.0202746483135943
437	C20H16orf87	4	2	0.020272542375809
438	CAMK2N1	4	3	0.0202601831357145
439	YKT6	1	4	0.0202549126899601
440	UBE2H	4	3	0.0202519888592749
441	YWHAZ	4	2	0.0202476064107128
442	H2AFZ	4	3	0.0202434122441334
443	GABARAP	4	3	0.0202398877859708
444	SMARCA4	4	2	0.0202392196457079
445	STXBP1	1	4	0.0202299111825358
446	CLDND1	4	2	0.0202294233590996
447	ZNF93	1	4	0.0202288435449482
448	PPFIA2	4	3	0.0202258076594543
449	GGA3	1	4	0.0202213544523284
450	GTF2A2	4	3	0.0202102944332952
451	APPBP2	1	4	0.0201994111168856
452	RPS21	4	2	0.0201855841232045
453	ENSMMUG00000030408	4	3	0.0201800169995146
454	NLGN2	4	3	0.0201668970764727
455	GNL2	1	4	0.0201580161802459
456	MEMO1	1	4	0.0201557680872615
457	NSG2	4	2	0.0201227853730382
458	ENSMMUG00000006803	4	2	0.0201135549686234
459	ANK2	4	3	0.0201126133368731
460	FAM89B	4	3	0.0201055309518097
461	ND2	1	4	0.0200973007323709
462	C4H6orf136	4	3	0.0200900500552083
463	MAGED1	4	3	0.0200712709750687
464	RPL13	4	3	0.0200692245701157
465	NDUFB2	4	3	0.0200211183548955
466	USP11	4	2	0.0200171198137049
467	VEZT	1	4	0.0200100262360625
468	HDAC2	4	3	0.0200069859351914
469	CBX1	4	2	0.0200017042453669
470	LSM8	4	3	0.0200004049462955
471	CDC42	1	4	0.0199988442077495
472	RPL19	4	3	0.0199697284655514
473	HNRNPDL	1	4	0.0199612585531037
474	ENSMMUG00000010266	4	2	0.0199474153863799
475	ENSMMUG00000053392	4	3	0.0199283261540769
476	MMD	4	3	0.0199177239488265
477	RPL35A	4	3	0.0198987899960427
478	SARAF	4	3	0.0198877874334195
479	TRAPPC1	4	3	0.0198854195676845
480	SLC25A36	4	3	0.0198853958890319
481	PTP4A2	1	4	0.0198736066349238
482	CAP2	1	4	0.0198714672661628
483	RPS12	1	4	0.0198675577926421
484	ERH	4	2	0.0198579826441884
485	CLIC4	1	4	0.0198574953491625
486	ATAD1	4	3	0.0198520111823577
487	RPS20	1	4	0.0198433448753044
488	ENSMMUG00000006463	4	3	0.0198383324338544
489	ATRX	4	2	0.0198233571697233
490	WNK1	4	3	0.0198040613123465
491	ND2	4	3	0.0197849935112236
492	NASP	1	4	0.0197803391289466
493	BTG1	1	4	0.019777156926535
494	SF3B1	4	3	0.0197760664932467
495	PCBP1	4	3	0.0197726776315163
496	GSK3B	4	3	0.0197491567078245
497	CNBP	1	4	0.0197348467388649
498	EIF5B	1	4	0.0197303622305904
499	FAM107B	1	4	0.0197247514512522
500	RPL13A	4	3	0.0197162878219922
501	COMMD3	4	3	0.0197090592763118
502	MLF2	1	4	0.0197055875712029
503	USP11	1	4	0.0197030188292229
504	WDR13	1	4	0.0196883042651667
505	SEPTIN7	1	4	0.0196804799843901
506	ENSMMUG00000005482	1	4	0.0196761880754366
507	UBP1	4	2	0.019663646946852
508	GOLGA7	4	3	0.019660461694787
509	MARCHF6	1	4	0.0196590312820945
510	SEC31A	1	4	0.01965880661931
511	LRP1	4	3	0.0196579551447952
512	SHOC2	4	2	0.0196557145832548
513	NEUROD2	1	4	0.0196414474737785
514	SH3GLB1	1	4	0.0196408159652212
515	RPL23A	4	3	0.0196372873200123
516	COQ10B	4	3	0.0196352263979037
517	CFDP1	1	4	0.0196332252074371
518	GPM6B	4	3	0.0196266104230332
519	COX7A2	4	3	0.0196227346452441
520	KDM1A	4	3	0.0196178857112037
521	CAPZA2	1	4	0.0196102212729962
522	GPATCH8	4	3	0.0196064045787535
523	ENSMMUG00000063637	4	3	0.0195947924810866
524	GTF2I	4	3	0.0195937739173559
525	PNMA8A	4	3	0.0195832622644468
526	ABCF1	1	4	0.019581393778221
527	NSD3	4	3	0.0195632298596685
528	SF3B3	1	4	0.019549553188254
529	SPTBN1	4	3	0.0195283442753483
530	MRPS21	4	2	0.0195216559518109
531	ST8SIA2	1	4	0.0195088242675597
532	TUBB3	1	4	0.0194933236868129
533	STIP1	1	4	0.0194857388320461
534	EIF3M	1	4	0.0194808230948605
535	PRPF40A	4	3	0.0194611639819306
536	UQCRH	1	4	0.0194583865820425
537	CENPF	4	3	0.0194470450665815
538	ACE	1	4	0.0194437735547796
539	COX1	4	2	0.0194182863092411
540	RPS24	4	3	0.0194105016198008
541	EIF3J	1	4	0.0193923904868798
542	UBE2D3	1	4	0.0193902161391022
543	IDH1	1	4	0.0193894921595268
544	LCA5	4	3	0.0193840559730537
545	ATP5MG	4	3	0.0193806202090214
546	RPS11	1	4	0.0193701731586804
547	FTH1	4	3	0.0193605073366661
548	RNF40	4	3	0.019347015313123
549	DCLK2	1	4	0.019344365485249
550	ENSMMUG00000060287	4	3	0.0193409182093326
551	CCDC34	4	3	0.0193392512210119
552	CELF2	4	3	0.0193325422829801
553	EEF1G	1	4	0.019331430623532
554	PUM2	4	2	0.0193119331595129
555	HMGCS1	4	3	0.0193020017633769
556	RHOBTB3	1	4	0.0193005819069129
557	H2AFY2	1	4	0.0192960984163299
558	MMD	4	2	0.0192953357869654
559	PGRMC2	4	3	0.0192847451163394
560	UBE2Q1	4	3	0.0192738698266841
561	DDR1	1	4	0.0192707772956524
562	PARP1	4	3	0.0192686308774624
563	FABP7	1	4	0.0192567690971731
564	ENSMMUG00000012140	1	4	0.019246115616448
565	GSTM4	4	3	0.0192405465728316
566	FSCN1	4	3	0.0192391989453685
567	KLHL23	1	4	0.0192321579376606
568	COX5A	4	2	0.0192310340033656
569	EIF1AX	1	4	0.0192288843336769
570	CSDE1	1	4	0.0192241241495172
571	POLR2C	4	2	0.0192230208023785
572	JAM3	4	3	0.0192227654707707
573	CDK13	1	4	0.0192124122179592
574	SDHAF2	4	3	0.0192019127115248
575	HSPH1	4	3	0.019188021274293
576	SLC38A2	1	4	0.0191797549210782
577	PSMB1	4	3	0.0191794408396283
578	FAM127A	4	3	0.019162589902308
579	ARHGAP21	1	4	0.0191619421557326
580	LSM14A	4	3	0.0191522246325252
581	G2E3	4	3	0.0191520603879481
582	LIMD2	4	2	0.0191512674746142
583	APC	1	4	0.0191510313880658
584	VEZF1	1	4	0.0191496124299929
585	ZNF483	4	3	0.0191129363577567
586	TOMM7	1	4	0.0191102452349237
587	DYNC1LI2	4	3	0.0191079413822985
588	MTPN	1	4	0.019102435932983
589	YWHAZ	4	3	0.019091080942272
590	SHOC2	4	3	0.0190843555707447
591	CCNI	4	3	0.019081262028761
592	ERH	4	3	0.0190726274794549
593	TOX3	4	3	0.0190714075809708
594	CREBZF	1	4	0.0190657867103985
595	GALNT1	1	4	0.0190615014460082
596	BTBD7	4	3	0.0190552650334381
597	SEPTIN9	4	3	0.0190552091171604
598	PDAP1	1	4	0.0190541697449848
599	TRIM72	1	4	0.0190467858706059
600	SRSF5	4	2	0.0190441924445596
601	ENSMMUG00000001858	4	2	0.0190399643312425
602	ZNF207	4	3	0.0190327622389272
603	RPL23A	1	4	0.0190261898375744
604	NEUROD1	4	3	0.0190247054379874
605	SDCBP	1	4	0.0190170282266313
606	EIF5	4	2	0.0190153271889478
607	JMJD1C	4	3	0.0190147640320486
608	STMN3	1	4	0.0190095045075608
609	PCBP1	1	4	0.0190056440973495
610	ID2	1	4	0.019000169527218
611	AFDN	4	3	0.0189989406290645
612	PARP6	1	4	0.0189957701951039
613	PTPN11	1	4	0.0189681905757577
614	MED23	4	3	0.0189652634975909
615	MLLT3	4	2	0.0189604597765778
616	GCN1	4	2	0.0189569347987885
617	NONO	4	2	0.0189507624924204
618	PPP1R11	4	3	0.0189406633357008
619	DCAF8	4	2	0.0189371886991407
620	TALDO1	1	4	0.0189321567281008
621	RBM6	4	2	0.0189178314286729
622	YPEL5	1	4	0.0189163805746878
623	C2H3orf14	1	4	0.0189054458440809
624	ACTR10	4	3	0.0189034476830939
625	TMTC4	1	4	0.0188839080608029
626	HNRNPUL1	4	3	0.0188630756675276
627	UFD1	4	3	0.018857022406547
628	COX5B	4	2	0.0188545205963057
629	TMEM106B	1	4	0.018841086107899
630	ENSMMUG00000052747	1	4	0.0188299527985011
631	ENC1	4	2	0.018818917658911
632	SMARCA4	1	4	0.0188169148854343
633	MSANTD3.TMEFF1	4	3	0.0188149039228522
634	GPM6A	4	3	0.018813629434518
635	ENSMMUG00000049151	4	3	0.0188039341425738
636	NAP1L4	4	3	0.0188017567884581
637	FAU	4	2	0.0187999461690144
638	COPA	4	3	0.0187995910261291
639	BCL9	4	3	0.0187986343772621
640	ENSMMUG00000041188	4	3	0.0187921618698284
641	DGCR2	4	3	0.018780751720436
642	BAZ1B	4	3	0.018780389928301
643	ILF2	4	3	0.0187780420806514
644	H1FX	1	4	0.0187768324656168
645	CNN3	4	3	0.0187740380432301
646	FADS1	4	3	0.0187736747551475
647	CD63	4	3	0.0187666412320359
648	PRMT2	4	3	0.0187580300236179
649	ZNF608	4	3	0.0187529995683953
650	PPP1R21	1	4	0.0187490245065177
651	ST13	4	2	0.018748150306311
652	SCRN1	4	3	0.0187373958192428
653	MIB1	1	4	0.0187281945234724
654	EGR1	1	4	0.0187165854254804
655	ASPH	4	3	0.0187101792860796
656	TUSC3	4	3	0.0187095541721875
657	RNF146	4	3	0.0187066055588918
658	RAB14	4	2	0.0187051507930998
659	USP47	1	4	0.0187029417435738
660	IVNS1ABP	4	3	0.0187022507967852
661	BTBD10	4	3	0.0186921057501892
662	CSNK2A1	4	3	0.0186906284072923
663	KIDINS220	4	2	0.0186906094465682
664	PNN	1	4	0.0186896624615191
665	CDK19	4	3	0.0186879745391796
666	KARS1	1	4	0.0186865946661056
667	BABAM1	1	4	0.0186804533451068
668	HSP90B1	1	4	0.0186658722622216
669	CRNKL1	4	2	0.01866273865933
670	GNAO1	1	4	0.018661034559889
671	RPS16	4	3	0.0186591116115752
672	ZNF292	4	3	0.0186491984943531
673	VPS4A	4	3	0.0186459345154081
674	TMEM259	1	4	0.0186406696834802
675	DSTN	1	4	0.0186376936576028
676	ZNF207	1	4	0.0186359457394765
677	C13H2orf68	1	4	0.0186326880451843
678	MAP2	4	2	0.0186324527030831
679	LRRN2	4	3	0.0186291937774079
680	B3GALNT1	4	3	0.0186231298060218
681	SRSF11	1	4	0.0186190798736286
682	PER1	1	4	0.0186170459370319
683	CDC5L	1	4	0.0186153993072356
684	ENSMMUG00000020073	1	4	0.0186140404646385
685	CHAMP1	1	4	0.0186080435987163
686	CDH11	4	3	0.0185952444501386
687	DYNLL1	4	3	0.0185853458172681
688	UGP2	4	3	0.0185783951486176
689	DBN1	4	3	0.0185749135379392
690	ENSMMUG00000065362	4	3	0.0185673084898418
691	THRAP3	4	3	0.0185618589296835
692	NUMA1	1	4	0.0185558802980377
693	ZCCHC3	4	2	0.0185494895884367
694	RPS17	4	3	0.0185446425959724
695	MORF4L2	1	4	0.018527434837805
696	RASAL2	1	4	0.0185073597469184
697	CHD7	1	4	0.0185053171410143
698	SNN	4	3	0.0185016737337527
699	NFIC	1	4	0.0184961388028838
700	SLC35E3	4	3	0.0184925605678906
701	TIGAR	4	3	0.0184920283470203
702	RNMT	4	3	0.0184897866449229
703	CCDC112	1	4	0.0184893764719428
704	STX12	4	3	0.0184865721902141
705	ENSMMUG00000044585	4	3	0.0184828022879347
706	CLASP2	4	3	0.0184778440776077
707	RPL26	4	3	0.0184684925033457
708	ELAVL4	1	4	0.0184660432607829
709	VCAN	1	4	0.018461020641784
710	RSF1	4	3	0.0184577744799192
711	ADAR	1	4	0.0184481716682364
712	TMEM131L	4	2	0.0184474602448506
713	DDAH2	1	4	0.0184450438970486
714	UBA1	4	2	0.0184376731083852
715	ENSMMUG00000003073	4	3	0.0184356230244988
716	CCT2	4	3	0.0184328269170058
717	DNM1L	4	3	0.0184308115331508
718	ENSMMUG00000019174	4	2	0.0184297037013342
719	SEC63	1	4	0.018427350962863
720	GINS1	4	3	0.0184218674832961
721	IP6K1	4	3	0.0184139645986823
722	CALR	4	3	0.0184051731739659
723	TCAF1	1	4	0.0183918902149931
724	DZIP3	1	4	0.0183833081262118
725	ANKRD11	1	4	0.018382178932373
726	MAD2L2	1	4	0.0183763115360396
727	VPS28	4	2	0.0183715662747273
728	ADH5	1	4	0.01836046499226
729	TBC1D25	1	4	0.018353135051941
730	DNER	4	3	0.0183462434525745
731	SPTAN1	4	3	0.0183456829716133
732	MAP2	4	3	0.0183352603182245
733	UBE2N	1	4	0.0183302924424522
734	FNBP1L	4	3	0.0183112770024654
735	TMEM35A	1	4	0.0183072253488127
736	SCG5	1	4	0.0182995134068487
737	HNRNPF	1	4	0.0182965237100781
738	KDM5B	4	2	0.0182961580492798
739	AAMP	1	4	0.0182892866085136
740	TNKS1BP1	1	4	0.0182876604625308
741	ZNF445	4	3	0.0182841452878297
742	ENSMMUG00000008383	1	4	0.018266057046554
743	ENSMMUG00000052609	4	3	0.0182660399933842
744	MSI1	4	3	0.018260655218247
745	NCSTN	4	3	0.0182573002852112
746	SOD1	1	4	0.0182544594556006
747	FXYD6	4	3	0.0182524773401719
748	PITPNB	1	4	0.0182485555320318
749	ENSMMUG00000014256	4	3	0.0182325681200349
750	FDFT1	1	4	0.0182320846856864
751	TARDBP	1	4	0.0182302799165452
752	DDX24	1	4	0.018226240702905
753	KIF5B	1	4	0.0182162196902583
754	TCF25	1	4	0.0182162149395908
755	SCAMP3	4	2	0.0182126467319614
756	BAZ1B	1	4	0.0182068345274997
757	PRKAA1	1	4	0.0181995303584034
758	TMEM30A	4	3	0.0181959779237415
759	PTGES3	4	3	0.0181935520580729
760	MAPK11	4	3	0.0181931508556903
761	N4BP2L2	4	3	0.0181781097754498
762	EPN1	4	3	0.0181774239075828
763	SETBP1	1	4	0.0181690526321746
764	ARMCX3	4	2	0.0181661273152441
765	ENSMMUG00000041188	1	4	0.0181603582175133
766	ABCE1	4	3	0.0181517239986013
767	SPAG9	4	3	0.0181509777669498
768	SRSF5	4	3	0.0181502422734043
769	EEF1B2	4	2	0.0181484418016276
770	SEPTIN3	4	3	0.0181411962169022
771	LBH	1	4	0.0181385575162657
772	IFI27L2	4	2	0.0181364887888321
773	SPAG9	1	4	0.0181288605872946
774	EEF1B2	4	3	0.0181224908586771
775	KIF5B	4	3	0.018114602106995
776	SLC1A3	4	3	0.0181086916237968
777	TCERG1	4	2	0.0181031063148064
778	BECN1	4	2	0.018099395426384
779	PKIA	1	4	0.018092036218637
780	WNK1	1	4	0.0180919189418298
781	VASH1	1	4	0.0180896757975156
782	ENSMMUG00000014256	4	2	0.0180883810434608
783	ZNF623	1	4	0.0180840687119718
784	SC5D	4	3	0.0180778766279939
785	LEMD3	4	3	0.0180776066056606
786	TRIM8	1	4	0.018070582173617
787	KIAA0408	1	4	0.0180491716831279
788	UBE2Q1	1	4	0.0180434136421415
789	PLEKHB2	1	4	0.0180427957971429
790	MAGED1	1	4	0.0180418452962219
791	MARCKSL1	4	3	0.0180414015095837
792	ENSMMUG00000064769	4	3	0.018026665225199
793	TMBIM6	4	2	0.0180257828383093
794	PRELID1	1	4	0.0180255361924816
795	UBE2D1	4	2	0.0180159958807519
796	RPL9	4	3	0.0180086951464089
797	RBFOX2	4	2	0.0179998108622986
798	COX8A	4	3	0.0179944084437223
799	ELF2	1	4	0.0179869776787158
800	ENSMMUG00000007657	1	4	0.0179839286371513
801	TTYH3	1	4	0.0179819814209769
802	RABL6	4	3	0.01797394738706
803	RTN4	4	3	0.0179667593998732
804	LZTR1	4	3	0.017951952529793
805	LSM12	4	3	0.017948229665581
806	KMT2E	4	3	0.0179446711138911
807	UPF3A	4	3	0.0179409675113494
808	HMGB1	4	2	0.0179377258887528
809	ZNF638	1	4	0.0179375547788537
810	RHOB	1	4	0.0179323726012402
811	TPM4	4	3	0.017929881392139
812	HSPD1	4	3	0.017928899764137
813	TTYH3	4	3	0.0179220176865265
814	SMN1	4	3	0.0179150939549229
815	SLC44A5	1	4	0.0179130158267745
816	ENSMMUG00000029973	1	4	0.0179117211629333
817	RPS13	1	4	0.0179063030882264
818	CCT6A	4	3	0.0179057197368367
819	LYRM2	1	4	0.0179055094542432
820	ACAD10	1	4	0.0178976941253837
821	ERBB3	4	3	0.0178972573453138
822	HNRNPDL	4	3	0.0178946988032883
823	ATP5F1C	4	3	0.0178827580303548
824	GCC2	4	2	0.0178822259600612
825	KIF1A	4	2	0.0178781555992758
826	CAND1	1	4	0.0178761740134173
827	ENSMMUG00000014862	1	4	0.0178741170370824
828	MRPL57	4	3	0.0178718378471422
829	IST1	1	4	0.017868277572493
830	USP11	4	3	0.0178649787340926
831	FKBP1A	4	3	0.0178607188311718
832	FBLIM1	4	3	0.0178525459953933
833	SRSF11	4	3	0.0178508519554751
834	ATP5PD	4	3	0.0178507496930434
835	ITSN1	4	3	0.0178479202058107
836	USP8	1	4	0.0178477483304064
837	UQCRH	4	3	0.0178474759677189
838	TIMM8B	1	4	0.0178446498803964
839	ZNF93	4	3	0.0178432645679688
840	HNRNPM	4	3	0.017839446114539
841	RTN3	4	3	0.017832956649214
842	VEZF1	4	3	0.0178234443846991
843	MATR3	1	4	0.0178224488561735
844	PTGES3	1	4	0.0178202173448131
845	MEGF9	4	3	0.0178134193193663
846	MRPL34	1	4	0.0178103608486205
847	HEXIM1	1	4	0.0178012669124721
848	CCNI	1	4	0.017797110361526
849	SMARCA4	4	3	0.0177969527518789
850	APP	1	4	0.0177919170478658
851	PDE9A	4	3	0.0177901796363229
852	RPS24	4	2	0.0177763501625909
853	LDHB	4	3	0.017768552274379
854	USP10	4	2	0.0177651555640487
855	XPO6	1	4	0.0177593289708579
856	BSDC1	4	2	0.0177540041239729
857	MTUS1	4	3	0.0177462618916112
858	BCL11A	4	3	0.017744375908682
859	EIF4A1	1	4	0.0177283513937976
860	ACIN1	1	4	0.0177249203025943
861	NUP54	4	2	0.0177234324348051
862	ENSMMUG00000019238	4	2	0.0177155747938958
863	USP7	4	3	0.0177149168347262
864	SCAMP1	4	3	0.0177145711650606
865	COX4I1	4	3	0.0177107043578336
866	CPEB4	4	3	0.0177085830495094
867	NAP1L1	1	4	0.0177080393822786
868	KIF2A	4	2	0.0177042909832365
869	RAB10	4	2	0.0176908691345453
870	MCL1	1	4	0.0176893244230074
871	PTPN11	4	3	0.0176871518505717
872	ATP5F1A	1	4	0.0176855919905685
873	TUBA1C	4	3	0.0176811137135838
874	MORF4L1	4	3	0.0176721628563634
875	CDK2AP1	4	3	0.0176637618348371
876	SEPTIN7	4	2	0.0176602819799399
877	PAK3	4	3	0.0176554525293939
878	PRPF4B	1	4	0.0176535286780384
879	PSIP1	1	4	0.0176473425408482
880	ANKRD11	4	3	0.0176410261100457
881	WAC	1	4	0.0176221063734609
882	RSL24D1	4	3	0.0176193895926786
883	TRIB2	1	4	0.0176130302879977
884	PPFIA2	1	4	0.017612480091179
885	NUDT3	4	2	0.0176042903050493
886	GDI1	1	4	0.0176004986518253
887	RPL36AL	1	4	0.0175987056365128
888	ENSMMUG00000005880	1	4	0.0175940924957978
889	CNOT2	4	3	0.0175849136658371
890	KHSRP	4	3	0.0175772146412797
891	ZC3H15	4	3	0.0175696135675169
892	PTDSS1	4	3	0.0175673242843702
893	PGK1	1	4	0.0175639530419787
894	SLC29A1	4	2	0.0175550478059148
895	NKTR	4	3	0.0175351765688413
896	RPL15	1	4	0.017529998008548
897	BZW2	4	2	0.0175211345512113
898	OCRL	4	3	0.0175189054789877
899	CSNK2A1	4	2	0.0175119679923731
900	CEP170	1	4	0.0175084695664201
901	ZBED5	4	3	0.0175053977798683
902	GRB2	4	2	0.0175014914213265
903	TCEAL2	4	3	0.0175001175141686
904	NOC3L	1	4	0.0174894487682412
905	MED13L	1	4	0.0174854148847613
906	ZUP1	1	4	0.0174838904707112
907	RPS28	4	3	0.0174815503974982
908	CDK12	4	3	0.0174774538818516
909	DAB1	4	3	0.0174764295438599
910	CELF1	4	3	0.017475640427462
911	UBR7	4	3	0.0174684333151377
912	DCTN4	4	3	0.0174613733009393
913	TUBB	4	2	0.017459762388159
914	RAN	4	2	0.0174595335425743
915	COX7C	1	4	0.0174583346793015
916	NFIX	4	2	0.0174563729292121
917	BEX4	4	3	0.0174560101821581
918	USP5	1	4	0.0174439246139316
919	DNAJB4	4	2	0.0174396167704523
920	ENSMMUG00000016009	1	4	0.0174366881795209
921	EIF4G1	4	3	0.0174364889659241
922	DNAJB6	1	4	0.0174278068029303
923	PCDHAC2	4	3	0.0174265006936463
924	ENSMMUG00000008417	4	3	0.0174219237594446
925	ZNF160	4	3	0.0174187570557368
926	NPM1	4	2	0.0174184878435303
927	ENSMMUG00000004539	4	3	0.0174125597390131
928	MATR3	4	2	0.0174077995154657
929	TPM4	4	2	0.0174033751021885
930	COX2	4	3	0.017401479233381
931	ATP6AP1	1	4	0.0174013040247422
932	RER1	1	4	0.0173955388982649
933	ENSMMUG00000022769	1	4	0.0173843299291941
934	PAICS	1	4	0.0173819552069715
935	CHRDL1	1	4	0.0173743192770584
936	RHNO1	4	3	0.0173741303791547
937	MMGT1	4	3	0.0173720513431101
938	CTNNB1	1	4	0.0173696694323327
939	ENSMMUG00000052127	4	2	0.0173626145198166
940	LZIC	4	3	0.0173598381833301
941	RPS24	1	4	0.0173587362087134
942	GARS1	4	3	0.0173582488263984
943	TPI1	4	3	0.0173558400557957
944	UBA52	4	2	0.0173545792895339
945	ARPC3	4	3	0.017348716226896
946	DROSHA	1	4	0.0173482517819935
947	VDAC1	1	4	0.0173468502569646
948	DDR1	4	3	0.0173446989599958
949	AGPAT1	4	3	0.0173443697944076
950	PSME3	4	3	0.0173337948052034
951	RNF5	1	4	0.0173255166120984
952	TMEM59	1	4	0.0173233051239965
953	METTL21A	1	4	0.0173124496244778
954	PAG1	4	2	0.0173104872954021
955	ARID4B	4	2	0.0173078936268889
956	CHD4	4	3	0.0173048907011995
957	SDF2	1	4	0.017302459955654
958	RPL10A	1	4	0.017296343613121
959	C4H6orf62	4	3	0.017289574010212
960	RAB18	1	4	0.0172745135416368
961	FUBP1	1	4	0.0172696401167079
962	MOB4	4	2	0.0172589017854925
963	MZT2B	1	4	0.0172556313904976
964	TUBB3	4	3	0.0172540404868159
965	KIF20B	4	3	0.0172483115945875
966	PHF6	4	3	0.017245666621596
967	NDUFB3	4	3	0.0172440852968611
968	TMA7	4	3	0.0172439649785188
969	CBX3	1	4	0.0172389205953381
970	WASL	4	3	0.0172313177667707
971	TRA2A	1	4	0.0172291226234051
972	UBE2D3	4	3	0.0172287078998038
973	RPL31	1	4	0.0172218456772192
974	ENSMMUG00000000983	4	3	0.0172105719448727
975	RPL27	1	4	0.0172061978691083
976	SYNCRIP	1	4	0.0171954791211632
977	HINT1	1	4	0.0171935852763633
978	CSTB	4	3	0.0171926959102817
979	SEC63	4	3	0.017192692738832
980	CTDSPL2	4	3	0.0171902035786739
981	ELOA	4	2	0.0171888807618781
982	FIS1	4	3	0.0171885698896156
983	COPS8	4	3	0.0171868916114931
984	NCL	1	4	0.0171858017058493
985	RPSA	4	3	0.0171833907376685
986	CSNK2B	4	2	0.0171793795396142
987	RB1CC1	4	3	0.0171792045250613
988	ANKRD50	4	3	0.0171733968078358
989	PRDM8	4	3	0.0171723057320462
990	RBM39	4	3	0.017168139029031
991	PPP2R5E	1	4	0.0171646984832831
992	AFAP1	4	3	0.0171639002647912
993	PSMF1	1	4	0.0171631360442247
994	RABGAP1	4	3	0.0171627226653136
995	SMC6	4	3	0.0171601449418147
996	CTBP1	4	3	0.0171596289507265
997	EIF3M	4	3	0.0171565882239639
998	EZR	4	3	0.0171555138236959
999	TMCO1	1	4	0.0171554355003588
1000	MORF4L1	4	2	0.0171550945417996
1001	CSDE1	4	3	0.0171550818260563
1002	ATP5F1B	1	4	0.0171530172484187
1003	COX1	4	3	0.0171526430661953
1004	ENSMMUG00000002320	1	4	0.0171459733511669
1005	BCOR	4	3	0.017144875538588
1006	ENSMMUG00000005880	4	3	0.0171443698039261
1007	AKAP9	1	4	0.0171424619700915
1008	RPS2	4	3	0.0171400765436969
1009	AZIN1	4	3	0.0171366164330393
1010	NFYA	1	4	0.0171341430451771
1011	RBFA	1	4	0.0171291103895876
1012	EEF1A1	4	2	0.0171282003874546
1013	TIAL1	1	4	0.0171265162766093
1014	EIF3A	4	3	0.017124902397496
1015	RAB11B	1	4	0.0171155696169435
1016	OLA1	4	3	0.0171129303823216
1017	ATP5IF1	1	4	0.0171128990438857
1018	ANP32B	4	2	0.0171125794705336
1019	ASAH1	1	4	0.0170948391406792
1020	PARP1	1	4	0.0170942335264909
1021	TUBA1A	1	4	0.01709390156108
1022	SRRM2	1	4	0.0170904581675228
1023	CTBP1	4	2	0.0170879777943751
1024	ENSMMUG00000061824	1	4	0.0170869930002576
1025	SF1	1	4	0.0170865641349783
1026	SF3B3	4	3	0.0170839009621866
1027	NELFCD	1	4	0.0170826426231453
1028	EWSR1	4	3	0.0170825647653662
1029	IPO7	4	3	0.0170728377293072
1030	ZC3H13	4	3	0.0170720495302144
1031	PAK2	4	3	0.0170689554693815
1032	ZC3H11A	4	2	0.0170672484971191
1033	TMEM70	4	3	0.0170569883285842
1034	PPP2R2B	4	3	0.017055899966414
1035	PSMD6	4	3	0.0170557444752724
1036	ENSMMUG00000064692	1	4	0.0170548179685988
1037	SLC35A3	4	3	0.0170543269778514
1038	NGRN	4	2	0.0170513132540585
1039	DTX3	1	4	0.0170513026047876
1040	BRD3	4	3	0.017049310892156
1041	ST3GAL5	4	2	0.0170463713909368
1042	EIF3E	4	2	0.017046069318974
1043	ACAP3	4	3	0.0170343131974496
1044	DDX5	4	2	0.0170334484782802
1045	RAB14	4	3	0.0170312232909599
1046	RAPGEF2	4	3	0.0170288846516869
1047	TLNRD1	1	4	0.0170216912752982
1048	UBL5	4	3	0.0170198833472393
1049	IST1	4	3	0.0170147083262083
1050	RTN2	4	2	0.0170139252873265
1051	NDRG1	4	3	0.0170102527290356
1052	MFF	1	4	0.0170092719019821
1053	PTTG1IP	1	4	0.0170036675977507
1054	SMG7	1	4	0.0170030055077029
1055	NRDC	1	4	0.0169979303104611
1056	SPCS2	4	3	0.0169966679651792
1057	ANP32A	1	4	0.0169947536007696
1058	ENSMMUG00000021539	1	4	0.0169938644196968
1059	FUNDC2	1	4	0.0169892351851487
1060	ENSMMUG00000049530	4	3	0.0169886061141485
1061	MED13L	4	3	0.0169842204356478
1062	BSCL2	1	4	0.0169794252394249
1063	DAZAP1	4	3	0.0169777473586937
1064	CKAP5	1	4	0.0169751255882498
1065	GSTM4	4	2	0.0169709578769581
1066	CNDP1	4	3	0.0169646700041536
1067	GNB1	4	3	0.0169610306463722
1068	WSB1	1	4	0.0169588231864661
1069	PALM	4	3	0.0169576705278084
1070	ZC4H2	4	3	0.0169521575541714
1071	EFNA2	4	3	0.0169489845482778
1072	VCPKMT	1	4	0.0169484255976022
1073	RACK1	1	4	0.0169434460851391
1074	ENSMMUG00000065175	1	4	0.0169411569766838
1075	OCIAD1	1	4	0.0169377934703329
1076	SLC22A17	4	3	0.0169272965601905
1077	ADD1	1	4	0.0169266587641367
1078	NCDN	4	3	0.0169218407571245
1079	RBBP4	1	4	0.0169216754027905
1080	CUL3	4	2	0.0169201139134028
1081	ADNP2	4	3	0.0169137676185591
1082	SSRP1	4	3	0.0169124921979871
1083	CREB1	4	3	0.0169102060895347
1084	PFDN6	4	2	0.0168990849999247
1085	ABR	4	3	0.0168976575132586
1086	SMIM14	4	2	0.0168970922676915
1087	SEC61B	1	4	0.0168964095465546
1088	KAT6A	4	2	0.0168951140992047
1089	TIGAR	1	4	0.0168804963364244
1090	FAM131B	4	2	0.0168753522932183
1091	SDHB	4	3	0.016867296851817
1092	GAPVD1	1	4	0.0168665718421883
1093	BRD2	4	3	0.0168662540663825
1094	LRRC4B	1	4	0.0168546453271735
1095	NDUFB9	1	4	0.0168484087261667
1096	PAFAH1B1	1	4	0.0168409677678897
1097	RAI14	1	4	0.0168387763341616
1098	RBM18	4	3	0.0168314090656354
1099	ZNF518B	1	4	0.0168253251970862
1100	ENSMMUG00000052035	1	4	0.0168248944389711
1101	MFAP2	1	4	0.0168160306971863
1102	ENSMMUG00000061128	1	4	0.016812259417517
1103	EEF1A1	4	3	0.0168097388922818
1104	PHAX	4	3	0.0168084689548876
1105	SYT1	1	4	0.0168076271276922
1106	DYNC1I2	4	3	0.016798608837676
1107	CCP110	4	3	0.0167878227970428
1108	ENSMMUG00000003234	4	3	0.0167871299399875
1109	AKIRIN2	1	4	0.0167845713712895
1110	CADM4	4	3	0.0167834188641505
1111	NARS1	4	2	0.0167815967301241
1112	ENSMMUG00000065246	4	3	0.0167811801997657
1113	DDX6	4	3	0.0167713708984321
1114	YPEL5	4	3	0.0167663138799851
1115	NUDT21	1	4	0.0167650439790431
1116	SLC39A6	4	3	0.0167607101076469
1117	EIF1AX	4	2	0.0167576101833665
1118	GDI1	4	3	0.0167542062095945
1119	RBBP6	4	2	0.0167516098089394
1120	MACF1	4	3	0.01675053182478
1121	GPR85	4	3	0.0167396792810227
1122	RPS29	4	3	0.0167378016712998
1123	TTLL1	1	4	0.0167320298501981
1124	BCL11A	4	2	0.0167273342251861
1125	ENSMMUG00000028689	1	4	0.0167271490939624
1126	ATRX	1	4	0.0167269261101656
1127	MED1	4	2	0.0167257898616046
1128	LUC7L3	4	2	0.0167175226118082
1129	CDK5R1	4	3	0.0167047707294904
1130	PPIA	4	3	0.0166971621338115
1131	HNRNPH1	1	4	0.0166968165182965
1132	PDIA6	4	2	0.0166952894570215
1133	SRSF2	1	4	0.0166946224625311
1134	MTSS2	4	3	0.0166902116072521
1135	PSMA3	4	3	0.0166878994351599
1136	NCBP2	4	3	0.0166874609759233
1137	VKORC1L1	4	3	0.0166874521733958
1138	ATP5MC2	1	4	0.0166830311663475
1139	TTC37	1	4	0.0166820209499346
1140	CEP350	1	4	0.0166786201711383
1141	TMEM9	4	3	0.0166742948751066
1142	TUBB2B	1	4	0.016671844192126
1143	LENG8	4	3	0.0166704928141696
1144	ZNF768	4	3	0.0166664468865235
1145	LRRFIP2	4	2	0.0166630569529332
1146	APP	4	3	0.0166597769187858
1147	TCF12	4	3	0.0166593569242798
1148	POLR2B	4	3	0.0166514924644483
1149	TBCC	4	3	0.0166507931749277
1150	TOR1AIP2	4	3	0.0166500329049606
1151	ENO2	4	3	0.0166492101144595
1152	TUBB4A	1	4	0.0166489882063031
1153	NDUFC2	1	4	0.016646063148761
1154	ZNF92	4	3	0.0166403172143736
1155	SEZ6	4	3	0.016636358877827
1156	SLC25A3	1	4	0.0166281981962612
1157	SLAIN2	1	4	0.0166271721341976
1158	H2AZ2	4	3	0.016621043602366
1159	MAT2A	1	4	0.0166104793674498
1160	THUMPD3	4	2	0.0166103775743043
1161	ENSA	4	2	0.0166103115857755
1162	RPL6	1	4	0.016606888716103
1163	SNRPD2	4	2	0.0166054553740955
1164	SNRPB2	4	3	0.0166052797663851
1165	EID1	1	4	0.0166009622480727
1166	CHD1	4	3	0.0166008564476224
1167	DOK4	4	2	0.0166002526047625
1168	UBA3	4	3	0.0165992806868199
1169	SEMA6C	4	3	0.016591913562117
1170	CD81	1	4	0.0165915653379025
1171	ENSMMUG00000028695	1	4	0.0165866044877552
1172	RBM18	1	4	0.0165822851918117
1173	CBX1	4	3	0.016580013554798
1174	PSIP1	4	3	0.0165793250615337
1175	ALKBH5	4	3	0.0165746949250498
1176	CIZ1	4	3	0.0165695575092475
1177	ENSMMUG00000057732	1	4	0.0165693726564021
1178	CYB5R3	4	2	0.0165689319714953
1179	ENSMMUG00000002273	4	3	0.0165687308680243
1180	ERP44	4	2	0.0165680143394541
1181	ENSMMUG00000021075	1	4	0.0165554953397708
1182	TOP1	1	4	0.0165504938905362
1183	TMED10	4	3	0.0165488834036997
1184	AMD1	4	2	0.0165487678573945
1185	HSPA8	1	4	0.0165422525405718
1186	RPL7	1	4	0.0165398690668956
1187	TERF1	1	4	0.0165386092651318
1188	PABPC1	4	3	0.0165285333084804
1189	P4HB	1	4	0.0165184438541826
1190	INSIG1	4	3	0.016515949825356
1191	PAK1IP1	4	3	0.0165152956156825
1192	EEF2	4	3	0.0165149915832746
1193	BCL9	1	4	0.0165109673980075
1194	EIF3F	4	2	0.0165108051336764
1195	RAD23B	4	3	0.0165039969536805
1196	ENSMMUG00000005593	4	3	0.0164991375477239
1197	RTN1	4	2	0.0164859064123172
1198	ENSMMUG00000063288	4	3	0.0164834873642773
1199	TSPAN7	4	3	0.0164821866504751
1200	NRDC	4	3	0.0164799208208094
1201	CNN3	4	2	0.0164775418762867
1202	ENSMMUG00000056472	4	3	0.0164768974836239
1203	FUBP1	4	3	0.0164736214335933
1204	SREK1	4	3	0.0164720101475637
1205	HNRNPH1	4	3	0.0164718932201086
1206	OXSR1	4	3	0.0164686475007014
1207	C1H1orf21	1	4	0.0164662360588371
1208	PCMTD2	4	3	0.0164639687089585
1209	THRAP3	1	4	0.0164558500333833
1210	PIGS	4	3	0.0164553133773047
1211	ASH1L	1	4	0.0164519431374123
1212	MTSS2	1	4	0.0164512258868565
1213	HSPH1	1	4	0.016449584113002
1214	VDAC3	4	3	0.0164471693052912
1215	LBR	4	3	0.0164453974317672
1216	SSBP2	1	4	0.0164433300147456
1217	DENND5B	4	3	0.0164396108140234
1218	EPHA3	1	4	0.0164392219160848
1219	LDHB	1	4	0.0164372751804715
1220	SS18L1	4	3	0.0164348969588456
1221	SRRT	1	4	0.0164348329097745
1222	KIDINS220	1	4	0.0164296843936417
1223	RPL13A	1	4	0.0164273513518345
1224	FUNDC2	4	2	0.0164264515336834
1225	SQLE	1	4	0.0164263990463406
1226	KLF10	4	3	0.0164233403183295
1227	NPM1	4	3	0.016416957300254
1228	H1.0	4	3	0.0164167546232594
1229	GCN1	4	3	0.0164160769345628
1230	GLT8D1	4	3	0.0164126949275799
1231	TBR1	1	4	0.016412452310395
1232	HNRNPH1	4	2	0.0164114259991607
1233	UBE2A	1	4	0.0164076893738889
1234	KLF7	1	4	0.0164018060684753
1235	ENSMMUG00000001210	1	4	0.016400015219846
1236	ENSMMUG00000017466	4	2	0.0163983611390129
1237	BRD3	1	4	0.0163978655026258
1238	HACD3	4	2	0.0163960182785445
1239	RPS7	4	2	0.0163955482821181
1240	ENSMMUG00000054067	4	3	0.0163952080449529
1241	AP2B1	1	4	0.0163894903730122
1242	SNRNP200	1	4	0.0163865260444462
1243	BUB3	4	3	0.0163803175596843
1244	SMARCAD1	4	3	0.0163784813752471
1245	SLC22A17	1	4	0.0163771616311343
1246	ST13	4	3	0.0163686890445939
1247	PAIP1	4	3	0.0163675142684043
1248	ZNF706	1	4	0.0163669398743174
1249	ENSMMUG00000060923	4	3	0.0163598227179603
1250	SYT4	4	2	0.0163585303481464
1251	CHP1	4	3	0.0163584708027408
1252	TASOR2	1	4	0.0163574162373151
1253	ENSMMUG00000061125	4	3	0.0163546959043567
1254	TRIB2	4	3	0.0163546952328267
1255	ELOC	1	4	0.0163517652736761
1256	DPM1	1	4	0.0163440810015657
1257	KPNA1	4	2	0.0163430673991689
1258	GPR107	4	3	0.0163410674515464
1259	OAZ1	4	3	0.0163394012365302
1260	HDAC6	4	3	0.0163381620134768
1261	ST7	4	3	0.016325475859369
1262	ENSMMUG00000029973	4	3	0.0163237164194962
1263	GFM1	1	4	0.0163230575182311
1264	ZNF770	4	3	0.016321166019872
1265	PRKAR2B	1	4	0.0163189440119107
1266	WDR48	4	2	0.016317835918294
1267	RPL15	4	3	0.0163106962021426
1268	LRPPRC	4	3	0.0163076759487741
1269	HACD3	4	3	0.0163075793100898
1270	DLGAP4	4	3	0.0163071049755933
1271	VDAC2	1	4	0.016296375868207
1272	ARIH1	1	4	0.0162951583871114
1273	C18H18orf32	4	3	0.0162923983962841
1274	MRFAP1	1	4	0.016292056276778
1275	SRSF1	4	3	0.0162903088389692
1276	BCL2L1	4	2	0.016290024179178
1277	ELOVL4	1	4	0.0162858121162151
1278	NFIX	1	4	0.0162851759690465
1279	MRPL37	4	2	0.0162812638633784
1280	TMEM59	4	3	0.016280644286313
1281	BMERB1	4	2	0.016278503629094
1282	UBXN4	1	4	0.0162784432694878
1283	FAXC	4	3	0.0162751992469229
1284	SRSF2	4	2	0.0162734970921795
1285	CCSAP	1	4	0.0162724573335708
1286	SYP	1	4	0.0162712860221826
1287	GLRX5	4	3	0.0162692269932419
1288	KRIT1	4	3	0.0162658237121599
1289	VPS45	1	4	0.0162617040526693
1290	PSMD14	4	2	0.0162610767674329
1291	ZNF134	4	3	0.0162573138235718
1292	TRIM27	4	3	0.0162454148941653
1293	STRIP1	1	4	0.0162436223639689
1294	PRSS55	1	4	0.0162434494547551
1295	PLPPR2	4	3	0.016240260557004
1296	RPS11	4	2	0.016230570542284
1297	ENSMMUG00000055584	4	3	0.0162262869674869
1298	TUBB4A	4	2	0.0162250382136045
1299	UBB	1	4	0.0162234589533039
1300	TM9SF3	4	2	0.016222824480778
1301	PAIP2	1	4	0.0162187593030654
1302	DDX3X	1	4	0.016212900396627
1303	STX7	4	3	0.0162121292597553
1304	FANCM	1	4	0.01621197544583
1305	ATP1B3	4	3	0.0162084200983234
1306	MARS1	4	3	0.0162071761123324
1307	SP4	4	3	0.0162041776962534
1308	DPYSL2	4	3	0.0162021840952558
1309	RTRAF	4	3	0.0161951770807069
1310	CCDC186	4	3	0.0161934537666121
1311	KIF15	4	3	0.0161933816694639
1312	KIAA1841	1	4	0.0161889811271117
1313	GSPT1	4	2	0.0161830943024207
1314	BAHCC1	4	3	0.016182500275464
1315	CUL3	4	3	0.0161778571417796
1316	VARS1	4	3	0.0161701916887375
1317	HNRNPD	4	2	0.0161697511187673
1318	HSP90AA1	1	4	0.0161671836077174
1319	SEM1	1	4	0.0161585544740819
1320	ENSMMUG00000043771	4	3	0.0161554031688233
1321	ZBTB18	1	4	0.0161548699278269
1322	COX2	1	4	0.0161499792068679
1323	PJA1	1	4	0.0161476317978022
1324	TUFM	4	2	0.0161449163720771
1325	ZSCAN18	4	3	0.016144078731914
1326	TRAPPC4	4	3	0.0161420935250021
1327	TERF1	4	3	0.0161406257761896
1328	TUB	4	2	0.0161393748380535
1329	TOX	4	3	0.0161372642817981
1330	ARHGAP21	4	3	0.0161358282714235
1331	C11H12orf49	1	4	0.0161335131378187
1332	GOSR1	1	4	0.0161329608048136
1333	VCAN	4	3	0.0161324885491474
1334	YY1	4	3	0.0161274791324235
1335	PRKX	4	3	0.0161267753547581
1336	RPS26	4	3	0.0161255827088802
1337	SLC25A4	1	4	0.0161236398585136
1338	HCFC1	4	2	0.0161200881143514
1339	NDUFA2	1	4	0.0161171683164552
1340	FRMD4B	4	2	0.0161135238859214
1341	UBTF	4	3	0.0161053753450437
1342	PPP1CB	4	2	0.0161048995375519
1343	ENSMMUG00000012843	4	3	0.0161009505899294
1344	FNTB	1	4	0.0160988107239873
1345	ASB8	4	3	0.0160985721925817
1346	NUAK1	4	3	0.016093675732147
1347	CDC16	1	4	0.0160917863722907
1348	PATZ1	4	3	0.0160899918871057
1349	GLG1	4	3	0.0160886169501597
1350	FTO	4	2	0.0160863007749944
1351	TM9SF3	1	4	0.0160862938118783
1352	RANGAP1	1	4	0.016082047631264
1353	ENSMMUG00000020073	4	2	0.0160819977166392
1354	RPL13	4	2	0.0160736791305022
1355	STIP1	4	3	0.016073484737635
1356	NUDT11	1	4	0.0160573308638272
1357	PM20D2	4	3	0.0160539481746131
1358	KIFBP	1	4	0.0160256639234178
1359	BUB3	1	4	0.0160217088364155
1360	SEC61A2	1	4	0.0160197221778218
1361	COX8A	1	4	0.0160196762019799
1362	ACBD3	4	3	0.0160180138373273
1363	CAP1	4	3	0.0160155634563819
1364	COX6C	4	2	0.0160131801377776
1365	GDAP1L1	4	2	0.016012054214319
1366	ESD	1	4	0.0160089455134846
1367	CREB1	4	2	0.0160079607529284
1368	TRIM28	4	2	0.0160077262552158
1369	G3BP1	1	4	0.0160049254933925
1370	SVBP	4	3	0.0160034164398972
1371	KLHL28	1	4	0.016002752994625
1372	NFIL3	1	4	0.0159843574380273
1373	FAM174C	4	3	0.0159842557263027
1374	CCDC82	4	3	0.0159820587482935
1375	TOMM20	4	3	0.0159797282685099
1376	MCTS1	4	3	0.0159683407941459
1377	CYB5R3	1	4	0.0159666556999604
1378	IGF2BP2	1	4	0.0159602839049412
1379	GSTM4	1	4	0.0159487748278176
1380	SRRM1	4	3	0.0159487166748344
1381	LARP1	4	3	0.0159474519845398
1382	XRCC5	1	4	0.0159422057293108
1383	CAPZB	1	4	0.0159410243486756
1384	RPL31	4	3	0.0159402195581679
1385	ATXN2L	1	4	0.0159371192960989
1386	PRR3	4	2	0.0159347222972372
1387	PARP6	4	3	0.015933236726722
1388	TRIM23	4	3	0.0159316845600997
1389	WTAP	1	4	0.0159312033547519
1390	AMER2	1	4	0.0159276255232063
1391	BEX1	4	3	0.0159231309300776
1392	OLFM2	4	3	0.0159229994216004
1393	GPM6B	1	4	0.015922320060505
1394	ABHD16A	4	2	0.015921900302038
1395	LCORL	4	2	0.0159129439883016
1396	ATP6V0A1	1	4	0.015906383364447
1397	TAF15	1	4	0.015905407853608
1398	CASC4	4	3	0.0159001269536137
1399	TRIR	1	4	0.015894715382291
1400	RPSA	4	2	0.0158923248052077
1401	RAD23B	1	4	0.0158904086676866
1402	NSFL1C	1	4	0.0158868092846202
1403	GPM6A	1	4	0.0158839954366998
1404	KLHL8	1	4	0.0158795641888718
1405	GDAP1L1	4	3	0.0158782432913397
1406	ENSMMUG00000004545	4	2	0.0158750154026752
1407	DPH3	4	3	0.0158713526661102
1408	ATP6V1B2	1	4	0.0158697767950041
1409	IFI27L2	1	4	0.0158655400762071
1410	SDHAF4	4	2	0.0158625515792582
1411	PSMD3	4	3	0.0158623297492248
1412	CTXN1	1	4	0.0158613189786234
1413	DYNC1LI1	4	3	0.0158611746903771
1414	SNRPB2	1	4	0.0158601875780167
1415	MOB4	4	3	0.0158598911412183
1416	BNIP3L	4	3	0.0158597881653032
1417	L1CAM	4	3	0.0158586567422326
1418	HECTD3	4	3	0.0158534761697115
1419	SIN3A	4	3	0.015852755149259
1420	SHPRH	4	2	0.0158517214537559
1421	ATP6V0A1	4	3	0.0158514529945395
1422	TBCE	4	3	0.0158511194148402
1423	DAZAP2	4	3	0.0158483409333961
1424	METAP2	4	3	0.0158434607894827
1425	ARL6IP5	4	3	0.0158355461470377
1426	CMAS	1	4	0.015830890791402
1427	CANX	4	3	0.0158295914315748
1428	RPS17	1	4	0.0158261576966451
1429	CELF2	1	4	0.01582508171757
1430	PCBP4	1	4	0.0158250093871898
1431	FAM127C	4	3	0.0158234434780648
1432	HNRNPAB	1	4	0.0158230124256768
1433	ERGIC1	4	3	0.0158192252837187
1434	CTDSP2	1	4	0.0158192215337841
1435	EIF3K	1	4	0.015818878706786
1436	CETN3	4	3	0.0158162716278483
1437	TOP2B	4	2	0.0158157065345682
1438	RAB8A	1	4	0.0158147809491338
1439	SBNO1	4	3	0.0158124634663262
1440	PANK3	4	3	0.0158060303387091
1441	USP16	1	4	0.0158016509900081
1442	MED28	4	3	0.0157979513390086
1443	SF3B4	4	3	0.0157951785622906
1444	TCEAL8	4	3	0.0157945875120725
1445	RPL24	4	3	0.015789905564461
1446	UBE3C	4	2	0.0157892954090976
1447	CDKN1B	4	3	0.0157888361515307
1448	MTA1	4	2	0.0157871394108872
1449	BZW1	4	3	0.0157867026851417
1450	ZNF146	4	3	0.0157855449867783
1451	PTPRF	4	3	0.0157835886373988
1452	SF3B2	1	4	0.0157800726911312
1453	RSRC2	4	3	0.0157784336655304
1454	UBL3	4	3	0.0157745413928752
1455	HMGCR	4	3	0.0157738289094212
1456	H2AFZ	1	4	0.0157728497069507
1457	ATF6	4	3	0.0157712887822682
1458	BCLAF1	4	3	0.0157702802191377
1459	SUPT20H	4	2	0.0157686378387648
1460	RAB6B	1	4	0.0157646314208052
1461	LRCH4	1	4	0.0157639201916802
1462	CBX8	4	3	0.0157631481890406
1463	RBM14	4	2	0.0157532776790389
1464	CDK5R1	1	4	0.0157480688781105
1465	FDFT1	4	2	0.0157463260173318
1466	PSMB1	4	2	0.0157460130301193
1467	DYNLL2	4	3	0.0157439300592877
1468	LARS1	4	2	0.0157423118149066
1469	ENSMMUG00000065373	4	3	0.0157415291773191
1470	ADSS2	1	4	0.0157401638332082
1471	NAPA	1	4	0.0157393028384332
1472	SF3B3	4	2	0.0157321329870515
1473	CHD2	4	3	0.0157294811148248
1474	CRMP1	4	2	0.0157293512490549
1475	TSEN34	4	3	0.0157290635999582
1476	KDM5B	4	3	0.0157231379822152
1477	NDUFA4	4	3	0.0157229964133422
1478	TOP2A	4	3	0.0157161496149245
1479	ENSMMUG00000058755	4	2	0.0157153657184354
1480	CTNNB1	4	2	0.0157112988005068
1481	ENSMMUG00000006293	1	4	0.0157102534033943
1482	PSMC5	4	3	0.015707932181129
1483	PSMD12	1	4	0.0157074655863501
1484	ENSMMUG00000003029	4	3	0.0157062855556721
1485	RALA	4	2	0.0157030091811633
1486	CTNND1	1	4	0.0156911551028213
1487	ASNSD1	4	2	0.0156878483899622
1488	RHOB	4	3	0.0156863309669787
1489	ZMPSTE24	4	2	0.0156853962908134
1490	ENSMMUG00000060287	4	2	0.015678703756726
1491	TMEM9B	4	2	0.0156781577581778
1492	ENSMMUG00000060576	4	3	0.0156765141721759
1493	CAPRIN1	1	4	0.0156748473522195
1494	DST	4	3	0.015663451948699
1495	THUMPD3	1	4	0.0156629137475429
1496	CHD9	4	3	0.015661323589047
1497	PHF1	1	4	0.0156585801577732
1498	SNX6	1	4	0.0156585749072652
1499	AASDHPPT	1	4	0.0156579227154634
1500	ARGLU1	1	4	0.015657160956463
1501	ENSMMUG00000006206	4	3	0.0156511302581429
1502	HSPA5	1	4	0.0156486626580964
1503	KLF3	4	2	0.0156413054660946
1504	PCNP	4	3	0.015641022089987
1505	HMGN4	4	3	0.0156397972108167
1506	TLN1	4	2	0.0156384069298974
1507	ODC1	4	3	0.0156354133700716
1508	MIB2	4	3	0.0156349664484254
1509	TMEM50A	4	3	0.0156348323095617
1510	CCNH	1	4	0.0156303019912671
1511	VEZT	4	3	0.0156252503467644
1512	HIF1A	4	3	0.0156246613528502
1513	TBR1	4	3	0.0156182958326123
1514	NT5C3A	1	4	0.015615379713756
1515	RAB14	1	4	0.0156140872272355
1516	DYNC1I2	1	4	0.0156118692224744
1517	ENSMMUG00000009018	4	3	0.0156107031492636
1518	GIGYF2	1	4	0.0156092509554847
1519	SEC62	4	3	0.0156076529683781
1520	ENSMMUG00000051392	1	4	0.0156075207548667
1521	TMEM14B	1	4	0.0156068136580243
1522	ATP5F1E	1	4	0.0156053505870079
1523	PSMA2	1	4	0.0156031263414987
1524	YWHAG	4	3	0.0156002851829421
1525	AMDHD1	1	4	0.0155993763452574
1526	CREB1	1	4	0.015597338857207
1527	WAC	4	3	0.0155864619577883
1528	NCOR1	1	4	0.0155859554879158
1529	CHD4	4	2	0.0155831550633834
1530	ATP5PB	4	2	0.0155809058193346
1531	RPS21	1	4	0.0155803461387262
1532	MAZ	4	2	0.0155760467069495
1533	FAM127A	1	4	0.0155737651770866
1534	IFT88	4	3	0.0155711920392533
1535	COPS3	4	3	0.0155683503159641
1536	RPS23	1	4	0.0155680183788579
1537	ATP5PO	4	3	0.015566635700096
1538	CDK5R1	4	2	0.0155643984490894
1539	SFPQ	4	3	0.0155634144416583
1540	DOCK11	4	2	0.0155613738190378
1541	RPS4Y1	4	3	0.0155591466257603
1542	ATF4	1	4	0.0155590019206219
1543	CFL2	4	2	0.0155568987582698
1544	DCUN1D2	4	3	0.0155529239092361
1545	CTDNEP1	4	3	0.0155458426937471
1546	PANK3	1	4	0.0155438565551496
1547	BLOC1S2	4	3	0.0155433920808191
1548	DCAF8	1	4	0.0155413340396307
1549	SLA	4	3	0.0155363179413951
1550	XPO1	1	4	0.0155332194983886
1551	KIF5C	1	4	0.0155325624986158
1552	METTL9	1	4	0.0155287654660918
1553	PPP2CB	1	4	0.0155266166434903
1554	ENSMMUG00000006206	1	4	0.0155216098795008
1555	MTPN	4	3	0.0155184360174491
1556	COPG1	1	4	0.0155167742967599
1557	RPL4	4	3	0.0155158423625879
1558	STX12	1	4	0.0155134933838507
1559	CMTR1	4	3	0.0155122667312298
1560	CSNK2A1	1	4	0.0155118193522655
1561	SF1	4	2	0.0155088208304385
1562	RALA	1	4	0.0155065164139836
1563	RBX1	4	2	0.0155055250663468
1564	IGF2BP2	4	3	0.0155025993177925
1565	RPSA	1	4	0.0155023585107619
1566	DKK3	4	2	0.0155022421004893
1567	DOCK7	1	4	0.0155017490848705
1568	ABI1	4	3	0.0154996643041809
1569	PTP4A1	1	4	0.0154985146184894
1570	PPP2R2B	1	4	0.0154962658361892
1571	NCAM1	1	4	0.01549601401359
1572	CDIPT	4	3	0.015494893730634
1573	DKC1	1	4	0.0154939797441198
1574	BRSK1	4	3	0.0154913817096574
1575	AIDA	4	3	0.0154902222760898
1576	NDFIP1	4	3	0.0154898050703546
1577	LRRC41	1	4	0.0154834334710629
1578	NFIB	4	2	0.0154800733724689
1579	TOMM22	1	4	0.0154799653474453
1580	UFC1	4	3	0.0154758409734036
1581	PRDM2	4	3	0.0154739549713799
1582	GSK3A	4	2	0.0154736804417993
1583	AKT1	4	3	0.0154701368862239
1584	IGF2BP2	4	2	0.0154665807313217
1585	TARDBP	4	2	0.015466421133143
1586	ENSMMUG00000042951	4	3	0.0154645351676479
1587	ELOA	4	3	0.0154639751460694
1588	SEC61G	4	3	0.015458117682125
1589	CHL1	4	3	0.015454558794175
1590	UBB	4	2	0.0154491678210746
1591	KPNA3	1	4	0.0154479811208573
1592	MTURN	1	4	0.0154469827941231
1593	TOMM70	4	2	0.0154460244925857
1594	PSMC4	4	3	0.0154440965612443
1595	GOLM1	1	4	0.0154418590621684
1596	IKBKG	4	3	0.0154399283835383
1597	BRK1	4	3	0.0154353745686833
1598	SEL1L	1	4	0.0154352912472906
1599	ENSMMUG00000000671	4	3	0.0154349587675726
1600	QRICH1	1	4	0.0154338942731744
1601	ACIN1	4	3	0.0154274543753032
1602	JPH4	1	4	0.0154257631999517
1603	NUFIP2	4	3	0.0154150385162518
1604	RPL9	1	4	0.0154136119307974
1605	FTSJ3	4	3	0.0154108693183476
1606	ERH	1	4	0.0154097644346243
1607	KCTD13	1	4	0.0154094899735033
1608	DYRK2	4	3	0.0154072941889165
1609	TAX1BP3	4	3	0.0153919310158341
1610	TMEM178A	1	4	0.015386376221102
1611	MBTPS1	1	4	0.0153835927809182
1612	NRIP1	4	3	0.0153757767067488
1613	ME2	1	4	0.0153712274401425
1614	ROMO1	4	3	0.0153630011548882
1615	PPP2R1A	4	3	0.0153622363536066
1616	ZNF518B	4	3	0.0153612207760706
1617	TVP23B	4	3	0.0153575557963378
1618	NDUFB4	4	3	0.0153567189150884
1619	RPS5	1	4	0.0153565042378256
1620	ENSMMUG00000041595	1	4	0.0153524953664744
1621	SLTM	1	4	0.015349033261055
1622	TMED10	1	4	0.0153404497851115
1623	CPSF7	1	4	0.0153331597832141
1624	PIK3R3	4	3	0.0153329776799136
1625	CAMK2N1	1	4	0.0153326792945218
1626	PSIP1	4	2	0.0153285778630052
1627	RAN	1	4	0.0153277063470483
1628	TRIM72	4	2	0.0153276540119273
1629	RPL10	1	4	0.0153275556559477
1630	MTA2	1	4	0.0153250244016678
1631	RBM25	4	2	0.0153123894138962
1632	RAB11A	1	4	0.0153113953391074
1633	RAD21	1	4	0.0153043207301674
1634	SYT11	1	4	0.0153029354430894
1635	MAP1B	4	3	0.0153025475378413
1636	ENSMMUG00000059641	4	2	0.0153014916161986
1637	HNRNPA2B1	4	2	0.0153011923156873
1638	CIR1	1	4	0.0153005989368255
1639	CPSF3	4	3	0.0153001169977011
1640	ENSMMUG00000059386	1	4	0.0152999204829826
1641	PIP4K2B	4	2	0.0152958742959598
1642	MYL6	4	3	0.01529498952347
1643	ATXN10	4	3	0.0152911733296804
1644	PUM1	4	3	0.0152831185179729
1645	RASA1	1	4	0.0152827205930035
1646	DYNC1H1	1	4	0.0152803998507743
1647	RPL22	4	2	0.0152782830710595
1648	SVBP	4	2	0.0152768507019224
1649	ZNF711	4	3	0.0152758509402299
1650	OARD1	1	4	0.0152727034325873
1651	NRSN1	4	3	0.0152717936174737
1652	NDUFA5	4	2	0.0152697411148847
1653	HPRT1	1	4	0.0152575168123579
1654	EPRS1	4	3	0.0152525248339479
1655	ENSMMUG00000055457	1	4	0.0152495123757876
1656	ZNF623	4	3	0.0152451101015075
1657	TBC1D25	4	2	0.0152373416419109
1658	RANBP1	1	4	0.0152305864759312
1659	NCOA7	1	4	0.0152295023315928
1660	RIOK1	1	4	0.0152283829173366
1661	SPIN1	1	4	0.0152271588450152
1662	DEDD	1	4	0.0152227919327393
1663	PIK3R3	4	2	0.0152211296165595
1664	COL4A2	4	3	0.0152199344156374
1665	SHOC2	1	4	0.0152153119689177
1666	GNAO1	4	3	0.0152116250670897
1667	MAX	1	4	0.0152084077478718
1668	RSF1	1	4	0.0152075206302853
1669	THOC1	1	4	0.0152072298536539
1670	TP53BP1	4	3	0.0152046138857527
1671	PSMD13	1	4	0.0152038283558614
1672	TMEM131L	1	4	0.01520276351643
1673	DHX9	4	3	0.0152014148419461
1674	CALCOCO1	4	2	0.0152005064647258
1675	SMDT1	1	4	0.0151991996810998
1676	ENSMMUG00000045959	1	4	0.0151979560579943
1677	SURF4	4	3	0.0151947540510346
1678	FABP7	4	3	0.0151925543231968
1679	SAFB	1	4	0.015192443788232
1680	CCDC66	1	4	0.0151912587662678
1681	SEM1	4	3	0.0151910467708404
1682	CCT3	4	3	0.0151901712958239
1683	PFDN2	4	2	0.0151873472104456
1684	MRPL43	1	4	0.015187340828093
1685	CGGBP1	4	2	0.0151853825545257
1686	ZEB2	4	3	0.0151833444591814
1687	AP3S1	1	4	0.0151797398522615
1688	YIPF3	1	4	0.0151735712826061
1689	MMD	1	4	0.0151715317363305
1690	GNG4	4	2	0.0151687163595856
1691	ENSMMUG00000064760	4	2	0.0151679701363204
1692	MMGT1	1	4	0.0151659082946876
1693	SMC3	4	3	0.0151624456932308
1694	ECHDC1	1	4	0.0151606255033138
1695	KPNA1	4	3	0.015156369236095
1696	ENSMMUG00000016898	1	4	0.0151542057839434
1697	ANP32B	4	3	0.0151513334343142
1698	FBXO11	1	4	0.0151495349784608
1699	FEZ1	1	4	0.0151451519783153
1700	MCRS1	1	4	0.0151447760989549
1701	UBE4A	4	3	0.0151439580757095
1702	CCNY	1	4	0.0151388135821206
1703	TCF3	4	3	0.0151363530071013
1704	BRD2	1	4	0.0151343936125044
1705	YPEL3	4	3	0.0151259874151707
1706	ENSMMUG00000001858	4	3	0.0151258705768951
1707	GNG5	4	2	0.0151258362103886
1708	EIF3H	4	3	0.0151235302718057
1709	LSM14A	4	2	0.0151232433319242
1710	RNF130	4	2	0.0151209916270059
1711	SYNE2	1	4	0.0151207547604028
1712	ENSMMUG00000055584	4	2	0.0151203561093111
1713	COPS6	1	4	0.0151136419064421
1714	WDR13	4	2	0.0151136185280253
1715	TNKS	1	4	0.0151095984420304
1716	CTDSP2	4	3	0.0151083358875702
1717	G3BP2	4	2	0.0151070686122104
1718	ENSMMUG00000019570	4	3	0.0151058388358577
1719	CUL5	1	4	0.015104942454596
1720	SOD1	4	2	0.0151040662984857
1721	ZBED5	1	4	0.015103513800202
1722	PRKDC	4	2	0.0151028323714216
1723	PCMT1	4	3	0.0151027248021211
1724	SMC3	4	2	0.0151015291816071
1725	LUC7L3	1	4	0.0151008847299792
1726	WDR61	1	4	0.0150996499569881
1727	ENSMMUG00000049324	4	2	0.0150993836297436
1728	ENSMMUG00000012140	4	2	0.0150986124131222
1729	PNISR	4	2	0.0150948126737031
1730	PDIA6	4	3	0.015092383735833
1731	TMEM132A	1	4	0.0150864801893121
1732	RPS5	4	3	0.0150851714452779
1733	PAK5	4	3	0.0150813755512954
1734	BZW1	1	4	0.0150813007439088
1735	TRIM25	4	2	0.0150802007587963
1736	ACTR10	4	2	0.015079522496174
1737	FYTTD1	4	3	0.0150774518169931
1738	PSAP	4	3	0.0150625910248404
1739	ID2	4	3	0.0150623105728065
1740	CNOT8	1	4	0.0150619270534982
1741	LMO4	1	4	0.0150579446975558
1742	CCSER2	1	4	0.0150572206885616
1743	KPNA3	4	3	0.0150543156529492
1744	GAP43	1	4	0.0150512088336342
1745	HNRNPA0	1	4	0.0150486101701568
1746	ADAM10	4	2	0.0150345573764156
1747	ARL14EP	4	3	0.0150309339221047
1748	TSG101	4	3	0.015028748228855
1749	COX6C	4	3	0.0150276951392142
1750	PTPA	4	3	0.0150206567213986
1751	SRGAP1	1	4	0.0150168719231418
1752	NDUFV2	1	4	0.0150160191602016
1753	TRA2A	4	3	0.0150156819199173
1754	ACSL4	4	2	0.0150153782352449
1755	DHRS7	4	2	0.0150125796734841
1756	TUB	4	3	0.0150104802909388
1757	SETD5	1	4	0.0150008546284873
1758	PSMA7	4	3	0.0150002666915702
1759	CYC1	4	3	0.0150000007256722
1760	RAB6B	4	3	0.0149997982109837
1761	TAX1BP3	4	2	0.0149918521469314
1762	ENSMMUG00000006206	4	2	0.0149857412689432
1763	PDIA4	4	2	0.0149839059217336
1764	GNG4	4	3	0.0149829622080758
1765	AHCYL1	1	4	0.0149814247944332
1766	PCM1	4	3	0.0149756422791769
1767	SH3BP5	4	2	0.0149735201159866
1768	PGRMC1	4	2	0.0149692274250076
1769	GFPT1	1	4	0.0149505879321015
1770	ENSMMUG00000006965	4	2	0.0149478959014153
1771	MAPRE1	1	4	0.0149474799322701
1772	ZHX1	4	3	0.0149437085245011
1773	HERC2	1	4	0.0149398058967364
1774	RPS26	4	2	0.0149392944405397
1775	JUN	4	2	0.014937613794944
1776	ENSMMUG00000053817	1	4	0.0149373473778066
1777	UBR7	1	4	0.0149303685742434
1778	ENSMMUG00000015095	4	3	0.0149298177059982
1779	MGA	1	4	0.0149286226486803
1780	TRIM37	4	3	0.0149283713887122
1781	PARP1	4	2	0.0149226104159184
1782	CNPPD1	1	4	0.0149207949453892
1783	TSPAN3	1	4	0.0149197912035753
1784	VIPAS39	4	3	0.0149181363627776
1785	CCDC6	1	4	0.0149153938430032
1786	MECP2	4	2	0.0149103768473133
1787	SYN1	1	4	0.0149047055856159
1788	STXBP1	4	3	0.014901484726951
1789	KIF2A	4	3	0.014899609565497
1790	SEC22B	4	3	0.0148957406462966
1791	MAP4K4	1	4	0.0148918615852416
1792	RPL27A	4	3	0.0148912590731248
1793	VTI1B	4	3	0.0148907252057919
1794	NISCH	4	3	0.0148906916170817
1795	ZEB2	4	2	0.014888261666886
1796	PSMD1	4	2	0.0148860842716833
1797	GTF2A2	1	4	0.0148801498326343
1798	TMEM14B	4	3	0.0148758219431509
1799	RAPGEF2	4	2	0.0148741312170991
1800	OSBP	1	4	0.014868928535078
1801	UBE2H	1	4	0.014866825379914
1802	FABP7	4	2	0.014866011722505
1803	MMUT	4	3	0.0148632805313516
1804	SNRPN	4	3	0.0148598062259213
1805	TERF1	4	2	0.0148558302623389
1806	TOPBP1	4	2	0.0148530315211731
1807	PIGT	1	4	0.0148515132088346
1808	KHSRP	4	2	0.0148504423594677
1809	ACVR2A	4	3	0.0148480533666411
1810	NSG1	4	3	0.0148457631368832
1811	NFYC	4	3	0.0148441027363181
1812	PTPRZ1	4	3	0.0148430246745591
1813	SYT5	4	2	0.014840423808914
1814	NPDC1	4	2	0.0148345879169548
1815	APMAP	1	4	0.0148295976715297
1816	RBM26	4	3	0.0148280247594468
1817	PCMT1	4	2	0.0148241641659757
1818	TAGLN3	1	4	0.0148233095830427
1819	MYL6B	1	4	0.0148200692662819
1820	ELOVL4	4	2	0.0148134885800312
1821	AP3D1	1	4	0.0148132171363392
1822	RAP1B	1	4	0.0148130467027652
1823	CWC15	4	2	0.0148108505591206
1824	DNAAF2	1	4	0.0148103305410635
1825	RAP2A	4	3	0.0148025252780722
1826	APC2	4	2	0.0147997029869598
1827	COPB2	4	3	0.0147977956146172
1828	RPL10A	4	3	0.0147940424575974
1829	UBQLN2	4	3	0.014791493869408
1830	DNAJA2	4	3	0.0147914268416178
1831	XPC	4	3	0.0147885575132145
1832	LIN7C	4	3	0.0147885032406561
1833	RPL35A	1	4	0.0147881083610629
1834	ENSMMUG00000055457	4	2	0.014783395596788
1835	MEGF9	4	2	0.0147784823293982
1836	TMEM259	4	3	0.0147779075696512
1837	MYL12B	1	4	0.014777609102343
1838	ACTR3B	4	3	0.0147721264650914
1839	SEC61B	4	3	0.0147698996489039
1840	C5orf15	4	3	0.0147696938283979
1841	SLC30A9	4	3	0.0147674210058713
1842	MBTPS1	4	3	0.0147649169173033
1843	RNF40	1	4	0.0147592777693253
1844	PALMD	1	4	0.0147586844496649
1845	CXHXorf56	1	4	0.0147578634213998
1846	DOK5	4	3	0.0147562620989744
1847	GNA13	1	4	0.0147561000770385
1848	PFDN1	1	4	0.0147550178400927
1849	LTN1	1	4	0.0147520049668139
1850	TM9SF2	1	4	0.0147479497577853
1851	CHD4	1	4	0.0147477386847206
1852	KDM5C	1	4	0.0147439080105569
1853	DYNC1LI2	4	2	0.0147434121774278
1854	EIF3L	4	3	0.0147367525130137
1855	STRBP	4	3	0.0147315204597851
1856	SRI	1	4	0.014731303234854
1857	PJA2	4	3	0.0147304345269177
1858	CSNK1G3	4	3	0.0147296366474127
1859	MTURN	4	3	0.0147271968534698
1860	PPIG	4	3	0.0147270913936467
1861	SSU72	4	3	0.0147222141239667
1862	GORASP2	4	3	0.0147164256790761
1863	MRPL20	4	2	0.014713921451818
1864	RNF2	4	3	0.0147112932847661
1865	HECTD4	4	3	0.0147095269614558
1866	YWHAB	1	4	0.0147083123838158
1867	FDFT1	4	3	0.0147070879791512
1868	UQCRQ	4	3	0.0147062259986962
1869	SARAF	4	2	0.0147057565107119
1870	EID1	4	2	0.0147039203799199
1871	RTN4	1	4	0.0147005616338465
1872	ATP6V1A	4	2	0.0146999682605076
1873	FEZ1	4	2	0.0146977627622406
1874	THOC2	1	4	0.0146963705957513
1875	SNRPD1	1	4	0.014693544952931
1876	RAB3D	4	3	0.0146904186215202
1877	SAFB2	4	2	0.0146878986452474
1878	RNF103	4	2	0.0146860037333079
1879	STAMBP	4	3	0.0146852152940763
1880	GALNS	1	4	0.0146824435255125
1881	ENSMMUG00000002246	4	3	0.0146814900984864
1882	LMAN1	4	3	0.0146776522793319
1883	EIF2AK2	1	4	0.0146762307216849
1884	SF3B4	4	2	0.014674837291149
1885	CD81	4	3	0.0146719449873907
1886	PFDN1	4	2	0.014671706065811
1887	FAM168B	4	3	0.0146698410830746
1888	ENSMMUG00000060287	1	4	0.0146691564637151
1889	CTDNEP1	1	4	0.0146680065516613
1890	ENSMMUG00000011798	1	4	0.0146651535781826
1891	CD47	4	2	0.0146641546283348
1892	EIF3D	1	4	0.0146574112683863
1893	DNAJC8	4	2	0.0146564111037981
1894	CARM1	1	4	0.0146556008940053
1895	NDUFC2	4	2	0.0146525399637814
1896	DDX18	1	4	0.014651179386788
1897	ANKRD12	1	4	0.0146498715714102
1898	HNRNPA2B1	4	3	0.0146492075827362
1899	YLPM1	1	4	0.0146492004730293
1900	ND4	4	3	0.0146471875366914
1901	MED21	1	4	0.0146451758985489
1902	NEMF	1	4	0.0146438541440696
1903	ORC3	4	3	0.0146435460655581
1904	ARID1A	4	2	0.0146421356196825
1905	EFL1	4	3	0.0146419902528105
1906	N4BP2	1	4	0.0146379887662082
1907	RARS1	4	2	0.0146367056751579
1908	PABPC1	4	2	0.0146364206800441
1909	NT5C2	1	4	0.0146334976846473
1910	SUB1	1	4	0.0146305254321845
1911	FMC1.LUC7L2	1	4	0.0146297175401494
1912	CCNG2	4	3	0.0146281848282013
1913	ATP2C1	1	4	0.0146244248094074
1914	ENSMMUG00000017231	4	3	0.0146232414248232
1915	EPRS1	1	4	0.0146224603649477
1916	HP1BP3	4	2	0.0146194529403588
1917	ENSMMUG00000041188	4	2	0.0146189759604554
1918	ENSMMUG00000064760	1	4	0.0146148602153037
1919	NEFM	4	2	0.0146098988429471
1920	RAP2A	1	4	0.0146051237296383
1921	KIF21B	4	3	0.014603192134715
1922	SRP72	1	4	0.014602702752765
1923	CDH11	4	2	0.0145994853107418
1924	CLK1	1	4	0.0145962660169912
1925	ARHGAP19	1	4	0.0145933793216772
1926	LSM5	4	3	0.0145930825648414
1927	MPC2	1	4	0.0145929270041203
1928	SYT11	4	3	0.014591989128536
1929	FBXW7	1	4	0.0145901614277487
1930	SNW1	1	4	0.0145873024255905
1931	STMN4	1	4	0.0145867127122329
1932	CCDC50	1	4	0.0145861895471851
1933	ENSMMUG00000052609	4	2	0.0145857254779376
1934	RFK	1	4	0.0145856144874829
1935	CETN2	1	4	0.0145831895231757
1936	DHX9	1	4	0.0145792828277064
1937	ZNF609	1	4	0.0145771655067914
1938	CMAS	4	3	0.014575202812479
1939	GSTT2B	4	3	0.0145736463501934
1940	PRXL2A	4	2	0.0145722859724147
1941	SRSF9	1	4	0.0145701512568724
1942	RPS16	1	4	0.0145676433676327
1943	ENSMMUG00000005593	4	2	0.014563448341716
1944	ENSMMUG00000006778	4	3	0.0145558154629579
1945	PPP1CB	4	3	0.0145520806698374
1946	DCAF5	4	3	0.0145517405512418
1947	KRBA2	1	4	0.0145514437881574
1948	LBR	1	4	0.0145507078163834
1949	RALBP1	4	2	0.0145494867689999
1950	HSPA9	4	3	0.0145481152230038
1951	HPCAL1	1	4	0.0145476443502882
1952	KMT2C	4	3	0.0145461779480508
1953	WTAP	4	2	0.0145300226134356
1954	NRXN1	4	3	0.0145294540709134
1955	ENSMMUG00000053817	4	3	0.0145273074247168
1956	SNX14	4	3	0.0145256835292587
1957	CCT2	1	4	0.0145241302901775
1958	TBRG1	1	4	0.0145236112980721
1959	ROCK2	1	4	0.0145227737069183
1960	PSME4	4	2	0.0145223410418862
1961	PHF12	4	3	0.0145169890423327
1962	COPS8	1	4	0.0145156889842028
1963	DDX46	1	4	0.0145145454115434
1964	MAP1B	4	2	0.0145122445167445
1965	ENSMMUG00000054106	4	3	0.0145116821954616
1966	APC	4	3	0.0145084349230819
1967	QKI	1	4	0.0145075907031006
1968	ATP5MPL	1	4	0.014505853726347
1969	X5-8S-rRNA	4	2	0.0145036561861839
1970	MORF4L2	4	3	0.0145021542834714
1971	NUP107	4	3	0.0145019392104648
1972	KIAA1841	4	2	0.0145015696812771
1973	SEPTIN5	1	4	0.014499738657407
1974	ATP6V0D1	4	3	0.0144973756184164
1975	UIMC1	4	3	0.0144952391554471
1976	ENSMMUG00000001462	1	4	0.0144942768622964
1977	SPCS2	1	4	0.0144901248991237
1978	SYP	4	3	0.0144806776274149
1979	ENSMMUG00000064286	1	4	0.0144795927105104
1980	GRB2	1	4	0.0144795369624818
1981	EPHA3	4	3	0.0144792831306085
1982	CHGB	4	3	0.0144789763914617
1983	HDAC2	1	4	0.014478491291787
1984	DDX18	4	2	0.0144778795950304
1985	TRAF7	1	4	0.014477417735967
1986	ZNF638	4	3	0.0144773911212083
1987	TADA1	1	4	0.0144762136530816
1988	TUBGCP4	4	3	0.0144740260460575
1989	SCG3	4	3	0.0144733595245088
1990	LARGE1	1	4	0.014473153935081
1991	NDUFA12	4	3	0.0144682050953314
1992	ATXN2L	4	3	0.0144679965200737
1993	LAMTOR3	4	3	0.0144665067621802
1994	ANKRD10	1	4	0.0144664791756974
1995	COTL1	4	2	0.01446647089559
1996	SRP72	4	2	0.0144657774571458
1997	ZNF429	4	3	0.014464426750262
1998	SEPTIN3	4	2	0.0144640119034049
1999	RUFY2	4	2	0.014459961014907
[truncated: 71,000 more rows]
