# Supplementary material for: Temporal transcriptomic dynamics in developing macaque neocortex
Source: eLife. 2024 Feb 28;12:RP90325. doi: 10.7554/eLife.90325 (PMC10911584; doi:10.7554/eLife.90325)
Supplement: Supplementary file 4. [file elife-90325-supp4.csv]

	feature_id	from	to	importance
1	RPS6	2	1	0.0414942922582747
2	U2AF2	2	1	0.0396089364842946
3	ENSMMUG00000013429	2	1	0.0383055366139955
4	RAB7A	2	1	0.0382217406714933
5	CCNI	2	1	0.0376318818140586
6	NFIA	2	1	0.0371688660794977
7	RPL13A	2	1	0.0360593874076912
8	HNRNPR	2	1	0.0356729319420042
9	GDI1	2	1	0.0351781685674543
10	VDAC2	2	1	0.0350848562659236
11	HNRNPH1	2	1	0.0344283394852064
12	CCPG1	2	1	0.0343896684593005
13	ENSMMUG00000059988	2	1	0.0343383338209158
14	HNRNPAB	2	1	0.0343271866264706
15	HNRNPH2	2	1	0.0330932513467234
16	TRIM28	2	1	0.0329643406551423
17	RBM25	2	1	0.0328040684489952
18	COX3	2	1	0.0328014479844874
19	PLEKHA5	2	1	0.032743669480965
20	USP1	2	1	0.0326972863181314
21	RACK1	3	4	0.0325575444905614
22	PAFAH1B1	2	1	0.0325372231946082
23	PABPC1	2	1	0.0324023788982188
24	SFPQ	2	1	0.0322876905568027
25	RPS28	2	1	0.0317553735557978
26	PNISR	2	1	0.0317228656689029
27	CSE1L	2	1	0.0315403125766925
28	CCT2	2	1	0.0314671104878932
29	SRRM1	2	1	0.0313578116390001
30	RPL37A	2	1	0.0311943011666155
31	TIGAR	3	4	0.0308715820729984
32	NPM1	3	4	0.0307943378842256
33	RPL10	2	1	0.0307305101029112
34	COX1	2	1	0.0306321811136245
35	ENSMMUG00000038373	2	1	0.0306058334191847
36	CEP57	2	1	0.0305656880644991
37	DYNC1I2	2	1	0.0305259820805108
38	ELOA	2	1	0.0305053520648748
39	RPS11	2	1	0.0304953494969555
40	HSPA8	2	1	0.0303421420654929
41	SNRPD3	2	1	0.0302463689173523
42	GLO1	2	1	0.0302299337630528
43	RPS24	2	1	0.0302144317741915
44	RPS3	2	1	0.030183501706279
45	EIF4G2	2	1	0.0301809388185103
46	GNG2	2	1	0.0299286878233508
47	PSMC1	2	1	0.0299129321084719
48	ENSMMUG00000055794	2	1	0.0298885946226022
49	YWHAE	2	1	0.0297465913347179
50	RPS20	3	4	0.0293902963938627
51	RPL9	2	1	0.0293863706948032
52	DDX5	2	1	0.0293817992311274
53	STMN1	2	1	0.0293215721525508
54	GPBP1	2	1	0.0293154950317823
55	MEX3D	2	1	0.0291208506917296
56	EWSR1	2	1	0.0291115586766105
57	ENSMMUG00000019174	3	4	0.0290408385837472
58	RTN4	2	1	0.0290158213637039
59	APP	2	1	0.0289575681404557
60	FNTB	2	1	0.0289005885139356
61	PPP3CA	2	1	0.0288950746017146
62	ENSMMUG00000061824	3	4	0.0287692760410134
63	GPM6A	2	1	0.0286722525481908
64	CNTLN	3	4	0.0286654257419901
65	PHF6	2	1	0.0286415744916196
66	HOOK3	3	4	0.0286372764442116
67	AKAP9	2	1	0.0283201268429176
68	PDIA6	2	1	0.0283002201841404
69	MEA1	3	4	0.0282998746279861
70	XRN2	2	1	0.0282414934091618
71	SYT11	2	1	0.028165971651073
72	NCL	3	4	0.0280500193195205
73	PNN	2	1	0.0280289228251946
74	JPT1	3	4	0.0279879810360327
75	RSRC2	2	1	0.0279118545968097
76	ENSMMUG00000060287	3	4	0.0278786823372431
77	ENSMMUG00000060287	2	1	0.0278353281580461
78	LRRN1	3	4	0.0278161074176721
79	EIF3H	2	1	0.0277786929147279
80	RTN3	3	4	0.0277333629845146
81	TGOLN2	2	1	0.027687623237284
82	SRSF6	3	4	0.0276585326791131
83	RPS20	2	1	0.0276338687320264
84	TMEM30A	2	1	0.0274925055698466
85	UBB	2	1	0.0274763590915358
86	Metazoa-SRP	2	1	0.0273663403251628
87	TRIM8	2	1	0.0273647237690577
88	TUBA1A	2	1	0.0273198408980989
89	PAIP2	3	4	0.0272864201759464
90	SON	2	1	0.0272859092155918
91	RAP2A	2	1	0.0272768434760809
92	RPL22	2	1	0.0272041595106515
93	ZC3H11A	2	1	0.0269876236753096
94	C18H18orf32	3	4	0.0269463383170095
95	HSBP1	2	1	0.0268843736968272
96	RPS8	3	4	0.0268514311717382
97	GAPDH	2	1	0.0268135845652892
98	MORF4L1	3	4	0.0267298490567577
99	HNRNPA2B1	3	4	0.0266123191452554
100	RPL37A	3	4	0.0265901169255475
101	ATP5MC2	3	4	0.0265564084813493
102	PSMD14	2	1	0.0264839422244095
103	HSPA5	3	4	0.026481070025537
104	RPL10A	2	1	0.0264738144917783
105	ENSMMUG00000062350	3	4	0.0264730876780276
106	DMTF1	3	4	0.0264169013847877
107	EEF2	3	4	0.0263844108350391
108	PRPS1	2	1	0.026328878410492
109	ENSMMUG00000028699	2	1	0.02629075918233
110	OARD1	2	1	0.026274237486615
111	RPL39	3	4	0.026267154476112
112	ENSMMUG00000019174	2	1	0.0262176652405841
113	ND2	3	4	0.0262109834323074
114	C18H18orf32	2	1	0.026206480461094
115	YWHAB	2	1	0.0261628812809924
116	MAZ	2	1	0.0261446584611299
117	VEZF1	2	1	0.0261022315503725
118	TUBB	3	4	0.0260550733849358
119	TMEM131L	2	1	0.0260394474007438
120	LIN7C	2	1	0.0260108972829154
121	RPS26	2	1	0.025986592457105
122	RPS29	2	1	0.0259638657414512
123	RPL23A	2	1	0.0259463724316428
124	NUDT3	2	1	0.0259158401054866
125	ENSMMUG00000012479	2	1	0.0259147696620052
126	PTGES3	2	1	0.0258728220849921
127	SF3A2	3	4	0.0257875424648489
128	CFL1	2	1	0.0257681766840146
129	CHD7	3	4	0.0257317832641618
130	ITM2B	2	1	0.0256706019283475
131	LEMD3	2	1	0.0256664774385215
132	RPS3A	2	1	0.025605212660151
133	KIF2A	2	1	0.0256047282300507
134	ENSMMUG00000060923	2	1	0.0255827232364619
135	ILF3	2	1	0.0255603660131025
136	TNPO3	2	1	0.0255089625812513
137	CASP3	3	4	0.0254032211218188
138	HNRNPUL1	2	1	0.0253938639634087
139	ATP5F1E	2	1	0.0253576405715065
140	HNRNPC	2	1	0.0253116173641609
141	TIA1	2	1	0.0253090828263546
142	DBN1	2	1	0.0252969591476282
143	NAP1L1	2	1	0.0252955130613269
144	LAMTOR1	3	4	0.0252931531132843
145	RPL24	2	1	0.0252886094338991
146	MAP1B	2	1	0.0252300939889584
147	ATP6V1G1	3	4	0.0251073412002006
148	RPS14	3	4	0.0251034972007961
149	TOPORS	2	1	0.0250202124948042
150	PICALM	2	1	0.0249779719070963
151	VCAN	3	4	0.0249763817815876
152	CARM1	2	1	0.0249749653913391
153	SPEN	3	4	0.0249748897933694
154	DCTN3	2	1	0.0249365882465409
155	NUP50	2	1	0.0249257294918275
156	NUCKS1	2	1	0.0248994577797452
157	HNRNPL	2	1	0.024865942315654
158	TCERG1	3	4	0.0248504568110459
159	SEPTIN7	2	1	0.024827846937403
160	HNRNPK	3	4	0.0248187136250606
161	MAGED1	2	1	0.0248003114196381
162	G3BP1	2	1	0.024762664807287
163	YWHAZ	1	3	0.024755903004996
164	RBM8A	2	1	0.0247471383492098
165	ENSMMUG00000052609	2	1	0.0247352017261912
166	ZFAND5	2	1	0.0247349908900074
167	C15H9orf78	2	1	0.0246530806499226
168	ENSMMUG00000014256	2	1	0.0246418332285929
169	GAP43	2	1	0.0245942775208191
170	ENSMMUG00000052424	2	1	0.024588758234489
171	BTF3	2	1	0.0245749455259052
172	HNRNPC	3	4	0.0245498424507225
173	BRWD1	2	1	0.0245322482396032
174	APEX1	2	1	0.0245189583319187
175	ST13	2	1	0.0245111593989195
176	TRIB2	2	1	0.0244762479158172
177	HNRNPU	2	1	0.0244608685442511
178	SRSF11	3	4	0.0244592080808221
179	RPS7	2	1	0.0244539106187193
180	COX7C	2	1	0.0244419734894502
181	KHDRBS1	2	1	0.0244282505283133
182	RPL32	2	1	0.0244192989427905
183	RBM42	2	1	0.0244176064452042
184	HDAC2	2	1	0.0244127882065253
185	DDAH2	2	1	0.0243480597485134
186	RPL5	2	1	0.0243092604230637
187	FTH1	2	1	0.0242939490965258
188	SUMO1	2	1	0.0242739047029247
189	BCL2L2.PABPN1	2	1	0.0242669328215537
190	TRA2A	2	1	0.0242654718647801
191	HNRNPA0	2	1	0.024265193393831
192	TMED4	3	4	0.0242508230927286
193	SLC35E2	2	1	0.0242447210983192
194	CBX2	2	1	0.0242303435997482
195	HOOK3	2	1	0.0242148902508578
196	RCOR2	2	1	0.0241828713120245
197	HMGB2	2	1	0.024174063114476
198	ENSMMUG00000015563	3	4	0.024172791385398
199	BEX2	3	4	0.0241316544627106
200	ENSMMUG00000028695	2	1	0.0241221910247862
201	TUBB	2	1	0.0241100626109457
202	SYNE2	3	4	0.0240927215487114
203	ENSMMUG00000022428	3	4	0.0240906934636942
204	DYNC1LI2	2	1	0.0240364009287765
205	RPL10	3	4	0.0240098178463283
206	ENSMMUG00000017966	2	1	0.0239675977377116
207	FAU	2	1	0.0239592972210088
208	QSOX1	2	1	0.023936525181069
209	MOSPD3	2	1	0.0238912658057634
210	DERL2	2	1	0.0238772192319148
211	HNRNPA2B1	2	1	0.0238247015936424
212	CDK5R1	3	4	0.0238193409993397
213	ACE	2	1	0.0237926330182278
214	PTTG1IP	2	1	0.0237906710258242
215	ATP1B3	3	4	0.0237750581135834
216	RPSA	3	4	0.0237735950985849
217	ENSMMUG00000065373	3	4	0.023711772084654
218	NFIB	2	1	0.0237083012284771
219	MAPK6	2	1	0.0236977930460127
220	ENSMMUG00000000983	2	1	0.0236857590790544
221	RAN	3	4	0.0236721374433558
222	ENSMMUG00000019238	2	1	0.0236649055984318
223	RPL7A	2	1	0.0236624751460373
224	LAPTM4A	2	1	0.023651464156374
225	NCAPG	2	1	0.023636524541924
226	STK38	2	1	0.0236190953213876
227	EIF4A2	2	1	0.0236004830568779
228	TMEM98	3	4	0.0235936435698908
229	C16H17orf49	2	1	0.0235846373576546
230	DAZAP1	3	4	0.0235762739387828
231	EEF1A1	2	1	0.0235686911376708
232	SPAG9	2	1	0.0235624918133718
233	SLIRP	2	1	0.0235387222124557
234	KDM5B	2	1	0.0235380821641121
235	H2AFY	3	4	0.0235031344418018
236	DVL3	2	1	0.0235007259771994
237	RAB3D	2	1	0.0234195935913603
238	STARD7	2	1	0.0234194060110939
239	DDX39B	3	4	0.0233898203482678
240	GTF2I	3	4	0.0233777480559796
241	TCEAL9	3	4	0.0233759111966784
242	ENSMMUG00000016898	2	1	0.0233752770740838
243	ABCF1	2	1	0.0233492133066509
244	NONO	2	1	0.0233461501827096
245	RAD23A	2	1	0.0233311237188092
246	EWSR1	3	4	0.0232755609793969
247	ENSMMUG00000030448	2	1	0.0232521926424226
248	KIF1B	2	1	0.0232520594479624
249	RPL28	2	1	0.0232160601792911
250	WDR75	3	4	0.0232150522627705
251	CEP170	3	4	0.0232001860113787
252	MSANTD3.TMEFF1	2	1	0.0231895041290569
253	ENSMMUG00000006965	2	1	0.0231803625146072
254	CCDC112	2	1	0.0231783759905841
255	PRKAR1A	3	4	0.0231697397835472
256	TOB1	2	1	0.0231696248911264
257	XRN2	3	4	0.0231628534391639
258	HNRNPH3	2	1	0.0230535814041751
259	STMN2	2	1	0.0230489901748839
260	PCDHGB5	2	1	0.0230273634612383
261	ERLEC1	2	1	0.0230075734344341
262	IDH2	1	3	0.0230035418862154
263	IPO9	2	1	0.0229989403236819
264	TUBB2B	3	4	0.0229756043900688
265	RPS12	2	1	0.0229683164453985
266	GNG4	2	1	0.0229408419283683
267	CCNY	2	1	0.0229335175992977
268	PHB2	2	1	0.0229263378525318
269	TPT1	2	1	0.0229205823048916
270	WASL	3	4	0.0228595007770267
271	GRIA2	2	1	0.0228461765054433
272	KIF5B	2	1	0.0228180251441571
273	RAD21	2	1	0.0228122129503695
274	SMARCE1	2	1	0.0227971060325265
275	ATP5F1B	2	1	0.0227952393998251
276	PHAX	2	1	0.0227800103140866
277	CSNK2A1	2	1	0.0227791230583736
278	IK	2	1	0.0227756648009521
279	CRMP1	3	4	0.0227698166933635
280	CDK5R1	2	1	0.0227492939287559
281	ATP5IF1	2	1	0.0227489324645821
282	TIAL1	2	1	0.0227363341379569
283	UBQLN1	2	1	0.0227350432216493
284	SMARCA5	2	1	0.0227317094060776
285	PRPF39	3	4	0.0227171581817697
286	STIP1	2	1	0.0226765224168842
287	NLGN2	2	1	0.0226708706902338
288	CENPU	2	1	0.0226556002644188
289	PPIA	2	1	0.0226349453155589
290	MIDEAS	2	1	0.0226308735698841
291	ENSMMUG00000052609	3	4	0.0226215667014859
292	DEK	2	1	0.0226037477159711
293	EZH2	2	1	0.0225967899830991
294	SUPT5H	3	4	0.022590518977084
295	METTL9	3	4	0.0225894616718939
296	ATRX	2	1	0.0225465353025477
297	MANEA	3	4	0.0225463943355807
298	RPL23	3	4	0.0225108568410855
299	RPL4	3	4	0.0224987472920099
300	ZNF644	2	1	0.0224420071691212
301	RPS29	3	4	0.0224404083340386
302	CCT4	3	4	0.0224343128523585
303	NGLY1	1	3	0.0224304186348797
304	UBE2N	2	1	0.0224185100966095
305	HNRNPH2	3	4	0.0224066134664168
306	NDUFV1	2	1	0.022392614588274
307	LMO4	3	4	0.0223532709266943
308	SNRNP27	2	1	0.0223372336698769
309	KIAA0408	2	1	0.0223340455055944
310	STAU1	3	4	0.0223333811918464
311	MLLT11	2	1	0.0223161530229382
312	CCDC50	3	4	0.0223024386944838
313	SMCHD1	2	1	0.0222977600138797
314	ENSMMUG00000005593	2	1	0.0222901445663193
315	ENSMMUG00000000350	2	1	0.0222838728782597
316	COL4A2	2	1	0.0222491394510959
317	DUSP1	3	4	0.0222342209741972
318	ENSMMUG00000017466	3	4	0.0222290299729262
319	ENSMMUG00000001858	2	1	0.0222247867882123
320	GOLGB1	2	1	0.0222222797552154
321	ENSMMUG00000020073	2	1	0.0221896624226615
322	PRDX5	2	1	0.0221850141459544
323	ARID4B	3	4	0.0221692864667422
324	MARCKSL1	2	1	0.0221679057976619
325	ND3	2	1	0.0221604418592622
326	RPLP1	2	1	0.0221439210228445
327	AKAP9	3	4	0.022138164518322
328	TRIM37	2	1	0.022129552789553
329	EIF4G2	3	4	0.022127408116301
330	ENSMMUG00000056620	2	1	0.0221153096495073
331	ZNF528	3	4	0.0221119059914248
332	NFE2L1	2	1	0.0220913844907153
333	ANP32B	2	1	0.0220897460808318
334	ENSMMUG00000005482	2	1	0.0220849600203896
335	CHD3	3	4	0.0220752071611343
336	GPAM	2	1	0.0220707929966406
337	CTXN1	3	4	0.0220653973325923
338	MEIS2	2	1	0.0220594559395073
339	COX2	2	1	0.0220551300849351
340	C2CD5	2	1	0.0220426614123545
341	ENSMMUG00000049151	3	4	0.022037250821601
342	ENSMMUG00000010266	3	4	0.0220152242813993
343	RPL39	2	1	0.0220051302077301
344	SARAF	2	1	0.0219851599536665
345	SSBP3	2	1	0.0219830630747671
346	YPEL3	2	1	0.0219827575623682
347	DTD1	2	1	0.021932622542598
348	ACTR6	2	1	0.0219236662493696
349	LMNB1	3	4	0.0219209567411669
350	DAZAP1	2	1	0.0219109853494481
351	EIF3F	2	1	0.0219079072680133
352	PUM1	2	1	0.0218938060661887
353	ENSMMUG00000056793	3	4	0.0218474995175693
354	ENC1	2	1	0.0218398427709542
355	MPHOSPH10	2	1	0.0218382428821954
356	RAB22A	2	1	0.0218354020916846
357	CCNI	3	4	0.0218351771495305
358	CCNI	1	3	0.0218150179547034
359	ENSMMUG00000053116	2	1	0.0218143782838891
360	ATP6V1E1	2	1	0.0218125441380366
361	CBX5	3	4	0.0218089041407133
362	MZT1	2	1	0.0218066718453569
363	RFC1	2	1	0.0217914549085888
364	STRN3	2	1	0.0217728851126966
365	RERE	2	1	0.0217620212391484
366	RSRC2	1	3	0.0217504316054554
367	MAGED2	3	4	0.0217323371116715
368	PTP4A1	2	1	0.021727365628404
369	RPS6	3	4	0.0217230626810564
370	MTPAP	3	4	0.0216946867668238
371	CD63	2	1	0.0216874760379713
372	PRKAR2B	2	1	0.0216680098096255
373	CBX1	2	1	0.0216655052187901
374	H2AZ2	3	4	0.0216557808935935
375	LRRN1	2	1	0.0216506506635361
376	TBC1D1	2	1	0.0216387405422391
377	TUBB2B	2	1	0.0216265210244208
378	STAU1	1	3	0.0216208090519783
379	CNBP	2	1	0.0216173761535985
380	GTF2I	2	1	0.0215998656886971
381	NAP1L4	3	4	0.0215927590148279
382	GSTM4	2	1	0.0215872995573668
383	LSM5	3	4	0.0215754587327311
384	RPS5	2	1	0.0215663591383434
385	TP53BP1	3	4	0.021526304622471
386	HGSNAT	2	1	0.0215194750880126
387	CEBPG	2	1	0.0215085494358874
388	SLC25A44	2	1	0.0215028140442252
389	VIM	2	1	0.0214971882015676
390	LZIC	3	4	0.021492092268698
391	SMC3	2	1	0.0214827561463223
392	SMARCA5	3	4	0.0214794659726299
393	CCDC88A	3	4	0.0214746891686049
394	CHCHD2	2	1	0.0214594778357649
395	ENSMMUG00000038373	3	4	0.0214461529418255
396	PRRC2B	3	4	0.0214379909997712
397	RALA	2	1	0.0214346328917838
398	RTN3	2	1	0.0214118834254385
399	RPS18	2	1	0.0214052215097442
400	B3GAT1	2	1	0.0214031678606913
401	RAD23B	3	4	0.0213905166263431
402	TMPO	2	1	0.0213871615984471
403	MCFD2	2	1	0.0213701861434322
404	BAZ1B	2	1	0.0213658428129835
405	NDN	2	1	0.0213596104937146
406	MOB4	3	4	0.0213541278941864
407	KIF1B	1	3	0.0213494793216133
408	CDC42	3	4	0.0213399892606368
409	CALR	2	1	0.0213358240074881
410	GABARAPL1	2	1	0.0213342949938145
411	SSR2	2	1	0.0213277830185163
412	TAB2	2	1	0.0213207785330817
413	RPS9	2	1	0.0213195242761275
414	ENSMMUG00000049855	2	1	0.021314395894132
415	PHF20L1	2	1	0.021307684904175
416	RSL1D1	3	4	0.0212989868908188
417	PPDPF	2	1	0.0212926568713578
418	SMC4	2	1	0.0212852999167263
419	G2E3	3	4	0.0212771123790917
420	BTG1	3	4	0.0212721174449763
421	EIF4G2	1	3	0.0212520310899697
422	NCOR1	2	1	0.0212515348453247
423	ACTR2	2	1	0.0212331271696808
424	ZBTB18	3	4	0.0212162147616572
425	PAICS	3	4	0.0212119699956336
426	NIPSNAP2	3	4	0.0212059723402187
427	ENSMMUG00000061536	2	1	0.0211694183758244
428	MIB1	3	4	0.0211671926357499
429	ZNF483	2	1	0.0211596760903932
430	SYNGAP1	3	4	0.0211560219412834
431	ENSMMUG00000053392	2	1	0.021149995512044
432	ZWILCH	2	1	0.0211445344625378
433	PHLPP1	3	4	0.0211387186001749
434	MATR3	2	1	0.0211369378929322
435	PPP1R2	2	1	0.0211293258616662
436	ENY2	3	4	0.0210969722516308
437	JUND	3	4	0.0210965887216941
438	CS	2	1	0.0210833887167889
439	IPO7	2	1	0.0210731621358636
440	LSM14A	2	1	0.0210683956861096
441	PPP4R3B	3	4	0.0210594953850795
442	COX1	3	4	0.0210583024149834
443	SLC22A17	2	1	0.0210544247364719
444	SAFB	2	1	0.0210488164548162
445	EIF3D	3	4	0.0210437753045137
446	ZBTB18	2	1	0.0210165162659531
447	SEC61B	3	4	0.0210092332759966
448	XRCC6	2	1	0.0210003183721232
449	RAB2A	2	1	0.0209994386616565
450	SEZ6	2	1	0.0209989125738346
451	RPS2	3	4	0.020997053660352
452	UBL3	3	4	0.0209960896779803
453	HNRNPD	3	4	0.0209947614189853
454	KIAA0232	2	1	0.0209940488509664
455	MCL1	2	1	0.0209811789493881
456	RPS14	2	1	0.0209751649889375
457	ENSMMUG00000015563	2	1	0.0209744291323951
458	UBTD2	2	1	0.0209687802289448
459	GLO1	1	3	0.0209370475065469
460	USP14	2	1	0.0209255858222161
461	USP10	2	1	0.0209103519514928
462	CFL1	3	4	0.0209091768256003
463	CLASP2	3	4	0.0209080567054919
464	ENSMMUG00000062012	2	1	0.0208932708156266
465	UBE2D3	3	4	0.0208825504129874
466	NFIX	3	4	0.0208788144570054
467	CELF2	3	4	0.0208605718570949
468	SETBP1	3	4	0.0208586652013428
469	RTN1	3	4	0.020845868294681
470	ENSMMUG00000004633	3	4	0.0208410428822195
471	SEPTIN3	2	1	0.0208129036169332
472	SCRN1	2	1	0.0207971615650897
473	LLPH	3	4	0.0207803660252683
474	EIF2S2	3	4	0.0207708387515702
475	RPL23	2	1	0.0207685199416859
476	ENSMMUG00000006608	2	1	0.0207653447811936
477	ENSMMUG00000011291	2	1	0.0207638489677823
478	EIF1AX	2	1	0.0207515938968369
479	PABPC1	3	4	0.0207509797799069
480	ZC3H13	2	1	0.0207334823023163
481	ENSMMUG00000008097	2	1	0.020731727603357
482	NAP1L5	2	1	0.0207311259546614
483	NDUFB4	3	4	0.0207028520740203
484	KMT2C	3	4	0.0206999038814951
485	RPL35	2	1	0.0206833496539082
486	SLC29A1	3	4	0.0206783891855644
487	UCHL1	2	1	0.0206772733541351
488	ENSMMUG00000001210	3	4	0.0206766551079412
489	BCL9L	2	1	0.0206719917844963
490	RTN4	3	4	0.0206624216633969
491	CLNS1A	2	1	0.0206594548938464
492	RDH11	2	1	0.0206512528469232
493	HP1BP3	2	1	0.0206059879395867
494	AMDHD1	2	1	0.0206056269978087
495	CTXN1	2	1	0.0205987010424068
496	ENSMMUG00000065362	3	4	0.0205970395579226
497	MYL6B	2	1	0.0205942477055445
498	TCP1	2	1	0.0205788403384537
499	USP7	2	1	0.020575253337271
500	CBX5	2	1	0.0205706298013165
501	ENSA	2	1	0.0205675571220352
502	GABARAPL2	2	1	0.020565793825392
503	DZIP1	2	1	0.0205552323294498
504	RPS13	2	1	0.0205367361646091
505	RPLP2	2	1	0.0205289474789151
506	NSD3	2	1	0.0205029192537419
507	LIN52	2	1	0.0204984039490041
508	SSR3	2	1	0.0204838207600967
509	CAPN1	2	1	0.0204814069037766
510	TAF7	2	1	0.0204777737017193
511	ENSMMUG00000005593	3	4	0.0204685248711016
512	PAFAH1B2	3	4	0.0204464595218188
513	KMT5B	2	1	0.0204222475883879
514	BCLAF1	2	1	0.0204187076485792
515	INSIG1	2	1	0.0204167604060242
516	GNG5	2	1	0.0204051094527611
517	HNRNPDL	3	4	0.0203995681632802
518	DHX9	3	4	0.0203992632865905
519	RPL38	2	1	0.0203834442734873
520	ENSMMUG00000056736	2	1	0.0203765139567922
521	KMT2C	2	1	0.0203752267959151
522	SEC11A	3	4	0.0203704767352261
523	CHRDL1	2	1	0.0203609513420602
524	RPL35A	3	4	0.0203598550711552
525	ENSMMUG00000061385	3	4	0.0203571169503487
526	ENSMMUG00000022769	2	1	0.020354081647939
527	ELAVL4	3	4	0.0203534721414484
528	CLDND1	2	1	0.020336748082715
529	LBR	2	1	0.0203335265936676
530	CLIC4	2	1	0.0203248254604524
531	PPIG	2	1	0.020320626074177
532	SH3GLB1	2	1	0.0203126620263759
533	SEPTIN2	2	1	0.0203112334891032
534	CCNK	2	1	0.0203085960104962
535	HAUS6	1	3	0.0203065216559907
536	TFG	2	1	0.0203059559033578
537	EIF3E	2	1	0.0202928469550968
538	PARK7	2	1	0.0202735802858096
539	ZNF146	2	1	0.0202717907171606
540	SKP1	2	1	0.0202703134756217
541	HNRNPD	2	1	0.0202672442111057
542	FOS	3	4	0.0202670700890241
543	RPS11	3	4	0.0202576701052943
544	ACTB	2	1	0.0202463260446908
545	COX6C	2	1	0.0202283938039613
546	SMARCA4	2	1	0.0202243862411275
547	BPTF	3	4	0.0202030816898299
548	AMOTL2	2	1	0.0201912150900732
549	TUBA1C	3	4	0.0201783969871394
550	UBE2K	2	1	0.0201742878686977
551	PPP1CB	3	4	0.0201689436403942
552	BUB3	2	1	0.0201687720696285
553	WSB1	2	1	0.0201677697403676
554	NOL11	2	1	0.0201619283962335
555	SCAMP1	2	1	0.0201497724808496
556	EIF4A2	3	4	0.020147707233559
557	PSMA3	2	1	0.0201440564187186
558	STK39	3	4	0.0201421921843545
559	ENSMMUG00000056793	2	1	0.0201421531521972
560	VEZF1	3	4	0.0201341301254222
561	TRIM72	3	4	0.0201113286759898
562	RPL13A	3	4	0.0201101374131726
563	ORMDL1	2	1	0.0201090101303542
564	SRSF10	2	1	0.0201017931053909
565	RBM22	3	4	0.0200952979014168
566	NDFIP1	2	1	0.0200794621543371
567	RBBP6	2	1	0.0200784890399362
568	UBE2N	3	4	0.0200706883728811
569	LRPPRC	2	1	0.020059541974226
570	SSBP3	3	4	0.0200576798576085
571	ENSMMUG00000051392	3	4	0.0200414490567759
572	ZNF326	2	1	0.0200340478919064
573	HECTD3	3	4	0.020029731155693
574	FAM120A	2	1	0.0199981269520115
575	DDX50	2	1	0.0199975227485254
576	ENSMMUG00000017466	1	3	0.0199935100265799
577	IPO7	3	4	0.0199878677572101
578	ZNF24	2	1	0.0199809208982935
579	PNRC2	2	1	0.0199725683273289
580	FLCN	3	4	0.0199716744011207
581	ENSMMUG00000028695	3	4	0.01996480653077
582	CLTA	3	4	0.0199546646356897
583	DYNC1LI2	3	4	0.019948619370736
584	YME1L1	2	1	0.019947460967507
585	HNRNPA1	2	1	0.0199407422729973
586	TBR1	2	1	0.0199352638157318
587	SRSF2	3	4	0.0199330168732411
588	TIGAR	2	1	0.0199330056355426
589	ENSMMUG00000060117	3	4	0.0199312692603436
590	PSAP	2	1	0.0199291181414838
591	FBXW7	2	1	0.0199231148622437
592	UBE2V1	2	1	0.0199202565735287
593	CCDC88A	2	1	0.0199094877833702
594	ENSMMUG00000052424	3	4	0.0199018706375361
595	ENSMMUG00000052127	2	1	0.0198998841296752
596	MACF1	2	1	0.0198927946579041
597	ENSMMUG00000001645	2	1	0.0198863965950357
598	ARRDC3	3	4	0.0198724232008703
599	FBXO5	2	1	0.0198658221964215
600	ZHX1	2	1	0.0198534809658041
601	RPS7	3	4	0.0198492959006263
602	PTOV1	1	3	0.0198470235010795
603	ZNF706	2	1	0.019834711013128
604	TMEM43	2	1	0.0198254170686373
605	ENSMMUG00000063732	2	1	0.0198136164250018
606	NSD2	2	1	0.0198120887492749
607	RPL7	1	3	0.0198113351966658
608	GRK2	2	1	0.0198028869992651
609	TCF4	2	1	0.0197983161893905
610	TUBA1A	3	4	0.019792171783231
611	GABARAP	3	4	0.0197816318670112
612	KIDINS220	2	1	0.0197756744570279
613	AAMP	2	1	0.0197731399482305
614	ACTG1	2	1	0.0197699428906509
615	GDI2	2	1	0.0197698000102829
616	ENSMMUG00000060923	3	4	0.0197488412960663
617	NDRG4	3	4	0.0197471724778768
618	TSPAN5	2	1	0.0197467814592968
619	LENG8	2	1	0.0197446965893102
620	PTP4A2	2	1	0.0197423890117092
621	POGZ	2	1	0.0197198161671198
622	NCAPH	2	1	0.0197142956872639
623	ZRANB2	2	1	0.0197044551721417
624	MAPRE1	2	1	0.0197016646558773
625	MED17	2	1	0.0196887153182075
626	FYN	3	4	0.0196714287262862
627	TINF2	2	1	0.019670277967908
628	ENSMMUG00000058037	2	1	0.0196595006135648
629	CHD4	2	1	0.019655591470844
630	FABP7	1	3	0.019655499235481
631	ENSMMUG00000053735	2	1	0.0196164904004614
632	CSNK2B	3	4	0.0196158470255703
633	RERE	3	4	0.0195998982639427
634	ND1	2	1	0.0195915899155579
635	CUL1	3	4	0.0195792099884023
636	UBLCP1	2	1	0.0195764398736398
637	HYLS1	1	3	0.0195727742853784
638	HSP90AA1	3	4	0.0195710147061528
639	NES	2	1	0.0195680736373874
640	GNG2	3	4	0.019567990586931
641	DHX9	2	1	0.0195633232888779
642	SRSF7	2	1	0.0195566790293493
643	FYN	2	1	0.0195421782149159
644	SRRM2	2	1	0.0195393276071489
645	PSMD1	2	1	0.0195235465843204
646	TTC19	2	1	0.0195145906323096
647	CAMK2N1	3	4	0.0195020199040513
648	ZC3H15	2	1	0.0194987739657537
649	WDR48	2	1	0.0194970094672439
650	YWHAG	2	1	0.0194902252536216
651	KMT2E	2	1	0.019489041525825
652	TXNDC12	2	1	0.0194847854102192
653	AASDHPPT	2	1	0.0194812506227661
654	RAI14	3	4	0.0194691487427097
655	SMS	3	4	0.0194684496769486
656	RUFY3	3	4	0.0194609988162641
657	MLF2	3	4	0.0194604726722755
658	SOX4	3	4	0.01945319245555
659	HMGCS1	2	1	0.0194527146414728
660	SYNE2	2	1	0.0194430502188986
661	NFIB	1	3	0.0194377458037024
662	GDI1	3	4	0.0194255357986425
663	NDUFA9	2	1	0.0194251322434191
664	SYNRG	2	1	0.0194240111650559
665	MAN1A2	2	1	0.0194189997918919
666	CNTFR	3	4	0.0194161876877354
667	TPR	3	4	0.0194089839378643
668	NFYB	2	1	0.0194081940890222
669	ENSMMUG00000060576	3	4	0.0194012391230746
670	ENSMMUG00000061125	2	1	0.0193978871232432
671	CCT8	3	4	0.0193973105675629
672	RPS3	3	4	0.0193925135894126
673	SETD2	2	1	0.0193882565952742
674	NGRN	3	4	0.0193856281333733
675	H2AFX	2	1	0.0193852077246491
676	OLA1	2	1	0.0193766819969587
677	CDC37	3	4	0.0193760210323827
678	THUMPD1	2	1	0.0193753056437736
679	TGOLN2	3	4	0.0193654346300697
680	CTNND1	2	1	0.0193537204177779
681	TRAPPC1	3	4	0.0193486028457005
682	SERBP1	2	1	0.0193479869007933
683	NOVA1	2	1	0.0193437922746958
684	EPS15L1	2	1	0.019333429389197
685	NUDT11	3	4	0.0193216361072298
686	ENSMMUG00000012419	3	4	0.0193164375602506
687	NSG2	3	4	0.0193095059334014
688	RBM39	3	4	0.0193086691815274
689	BRK1	2	1	0.0193037489575915
690	ZNF207	2	1	0.0193025687307313
691	EIF2S2	2	1	0.0192966392818722
692	RPSA	2	1	0.0192955156759293
693	OST4	2	1	0.0192952605457121
694	BEX2	2	1	0.0192939470526251
695	RPS28	3	4	0.0192933722000431
696	LSM2	2	1	0.0192924624134883
697	PAICS	2	1	0.0192918652745461
698	MLLT11	3	4	0.0192891686056955
699	NPM1	2	1	0.0192859752144232
700	GPSM2	1	3	0.01928411927748
701	SERBP1	3	4	0.0192769513730247
702	ERH	2	1	0.019273874624914
703	RPL5	3	4	0.0192666294299612
704	MSI1	2	1	0.0192637981062484
705	ENSMMUG00000064551	2	1	0.019258688061507
706	SYF2	1	3	0.0192581401894373
707	FAF2	2	1	0.0192573735635276
708	SSRP1	3	4	0.0192524421567052
709	GNPAT	2	1	0.0192494813754477
710	DDX17	3	4	0.0192380339835901
711	GALNS	2	1	0.0192273458308487
712	PRKAR1A	2	1	0.0192248806496945
713	ACTG1	3	4	0.0192150243602783
714	WBP11	2	1	0.0192142069793004
715	MPHOSPH8	2	1	0.0192074480623782
716	KIF5C	2	1	0.0192019384847231
717	NUS1	3	4	0.0191967472843473
718	TOP1	2	1	0.0191958061627357
719	CKAP2	1	3	0.0191946425950044
720	WDR83OS	3	4	0.0191900261488738
721	HTATSF1	2	1	0.0191850659595943
722	BTBD10	2	1	0.0191825421493763
723	RPL32	3	4	0.0191812587860877
724	GORASP2	2	1	0.0191785347594879
725	ATP5MC2	2	1	0.0191781157069884
726	ENSMMUG00000011714	2	1	0.019177485461281
727	HNRNPF	2	1	0.0191448261175757
728	JAM3	2	1	0.0191359514496194
729	ECHDC1	2	1	0.0191342162253804
730	GRB2	3	4	0.0191215177605401
731	UBA1	2	1	0.0191191416807282
732	TPR	2	1	0.0191046308255443
733	RTKN2	2	1	0.0191005854284381
734	MRPL57	2	1	0.0190967322616667
735	KDELR1	2	1	0.0190914444788052
736	ST8SIA2	2	1	0.0190904199508285
737	ING1	2	1	0.0190880409288283
738	MPC2	2	1	0.0190873942733905
739	DDX24	3	4	0.0190761346286943
740	WDR1	2	1	0.0190737681768631
741	RWDD1	2	1	0.0190710643263645
742	ARL4D	3	4	0.0190606876307836
743	ENSMMUG00000006803	2	1	0.0190571156979537
744	CDC37	2	1	0.0190364690919672
745	CCAR2	3	4	0.0190060988500748
746	MDK	3	4	0.0190035095109224
747	ZC3H15	3	4	0.0190034093688887
748	RGMA	2	1	0.0189983286966472
749	SON	3	4	0.0189951502514043
750	AP2B1	1	3	0.0189882416695601
751	SAAL1	2	1	0.018971742902942
752	FOXG1	2	1	0.0189677791045283
753	ENSMMUG00000010266	2	1	0.0189641601518525
754	C1QBP	2	1	0.0189621770140658
755	RPS8	2	1	0.0189561899610396
756	CTNNB1	2	1	0.0189439885341643
757	TFAM	3	4	0.0189402893918026
758	PSIP1	3	4	0.0189366349013097
759	ENSMMUG00000028672	2	1	0.0189274239262344
760	GPM6B	3	4	0.0189164509945336
761	VPS26A	2	1	0.0189119077984386
762	PPP1R12A	2	1	0.0189050324543044
763	COMT	3	4	0.0189047974106361
764	SERINC1	2	1	0.0189033829090271
765	NECTIN3	3	4	0.0188921067845934
766	HNRNPUL1	1	3	0.0188855374993868
767	FTH1	3	4	0.0188844525043784
768	ACIN1	2	1	0.0188840460715619
769	RPS4X	3	4	0.0188831756953426
770	ARF1	3	4	0.0188780924684271
771	XRCC5	2	1	0.0188732773455632
772	PHIP	2	1	0.0188677595926956
773	ATP5MG	2	1	0.0188567831004333
774	LBR	1	3	0.0188502462993205
775	NUCB2	2	1	0.0188377597595456
776	FUBP1	3	4	0.0188376825147089
777	LRPPRC	3	4	0.0188366876074342
778	PDCD6IP	2	1	0.0188316834697933
779	ENSMMUG00000003073	3	4	0.0188309288700153
780	FNDC3A	2	1	0.0188210287170511
781	ATP5PD	2	1	0.018820066264323
782	UBE2E3	2	1	0.0188116726845234
783	ENSMMUG00000009018	2	1	0.0188045322292152
784	CNRIP1	2	1	0.0188041686805844
785	SNRNP200	3	4	0.0188036674792328
786	ELOA	3	4	0.0187954333202907
787	PARP1	3	4	0.0187838912395381
788	ANP32A	2	1	0.0187787914376955
789	TSG101	2	1	0.0187771841064203
790	PHF3	1	3	0.0187769573195318
791	EIF3J	3	4	0.0187741246678378
792	HECTD1	2	1	0.0187671497835943
793	HSPD1	2	1	0.0187660511873146
794	RNASEH2B	2	1	0.0187598500400434
795	GNB2	2	1	0.0187531808707368
796	RBM25	3	4	0.0187393290498826
797	SF3B1	2	1	0.018721940982153
798	ENSMMUG00000011798	3	4	0.0187154727053025
799	FSCN1	2	1	0.0187104053527005
800	C11H12orf57	2	1	0.0187093551467205
801	PNISR	3	4	0.0187077824366185
802	SMAP2	2	1	0.018706753205913
803	DYNC1H1	2	1	0.0187055773158979
804	ENSMMUG00000006965	3	4	0.0186940174514207
805	KIF20B	2	1	0.0186899121228845
806	NR2F1	2	1	0.018681496094477
807	HMGB1	2	1	0.0186784325669242
808	NXPH4	3	4	0.0186760346021388
809	PAX6	2	1	0.0186737839205943
810	RHOB	3	4	0.0186710304292829
811	ENSMMUG00000051440	3	4	0.0186601835894669
812	RPS18	3	4	0.0186594963953151
813	MECP2	2	1	0.0186575432220119
814	PEBP1	2	1	0.0186517800033368
815	ENSMMUG00000065175	2	1	0.0186493683066581
816	GNL3	2	1	0.0186445983032444
817	HSPD1	3	4	0.0186342832190198
818	TRAPPC1	2	1	0.0186270980811013
819	MORF4L1	2	1	0.0186252939100136
820	TSPAN7	2	1	0.0186249515533866
821	ENSMMUG00000039070	2	1	0.0186242425858458
822	ZNF24	3	4	0.0186113043505302
823	USP21	2	1	0.0186010088850805
824	UBE2L3	3	4	0.0185968707903576
825	ENSMMUG00000018740	2	1	0.0185966943578321
826	STX2	1	3	0.0185816210571131
827	CCP110	2	1	0.0185744928162052
828	ELAVL3	3	4	0.0185652396872249
829	WDR43	2	1	0.0185389793092719
830	ND2	2	1	0.0185353849177119
831	RUFY3	2	1	0.0185260742040398
832	KIF2A	3	4	0.0185221951123495
833	CDK2AP1	2	1	0.0185159595503369
834	NDUFA1	3	4	0.0185137255885816
835	CLINT1	2	1	0.0185081502157863
836	PPIL1	2	1	0.0185025236463238
837	SCRN1	1	3	0.0184967978781911
838	MFAP2	2	1	0.0184927535623005
839	DAZAP2	2	1	0.0184890634475658
840	DIAPH3	2	1	0.0184878637723731
841	ENSMMUG00000055457	3	4	0.0184844689781759
842	ENSMMUG00000055584	2	1	0.0184807895219965
843	NAE1	3	4	0.0184788969700296
844	NME2	2	1	0.0184777969498806
845	EID1	2	1	0.0184766828817855
846	SRSF11	2	1	0.0184745497006718
847	PTGES3	3	4	0.0184724712039032
848	FABP7	2	1	0.0184706857326151
849	PUF60	2	1	0.0184698426446886
850	TMX3	2	1	0.0184525540809175
851	ADD1	2	1	0.0184524322074551
852	SCARB2	2	1	0.018444798858132
853	RPL27	2	1	0.018441029210386
854	ZNF181	2	1	0.0184353981192731
855	PNMA8C	1	3	0.0184215116310754
856	ZNF609	3	4	0.0184212856820674
857	MDH1	3	4	0.0184193579692991
858	PCM1	2	1	0.018414181517521
859	RPL6	2	1	0.0184140093875738
860	LRRC4B	2	1	0.01840942529488
861	OGA	2	1	0.0184000863894046
862	GPAA1	2	1	0.0183996017833637
863	GPM6B	2	1	0.0183958550342233
864	MRPL37	2	1	0.0183938779898995
865	DIXDC1	2	1	0.0183916374372864
866	RPS26	3	4	0.0183868818416791
867	EOMES	3	4	0.0183782342619206
868	XRCC2	3	4	0.018376960366
869	BRD3	2	1	0.0183756682564074
870	ENSMMUG00000059641	3	4	0.0183732530172645
871	TMEM59	2	1	0.0183721306700845
872	ATF4	2	1	0.018371318835776
873	ENSMMUG00000010630	3	4	0.0183694322134328
874	YJEFN3	3	4	0.0183595589796363
875	RTF1	3	4	0.0183589261801493
876	GOLM1	3	4	0.0183582332993158
877	NDFIP1	3	4	0.0183557922980191
878	NDUFA12	3	4	0.0183537875851979
879	PHF5A	2	1	0.018351636116135
880	SRP9	2	1	0.0183492685315123
881	SSBP1	2	1	0.018341760606433
882	TMEM123	1	3	0.0183311897543824
883	LAMTOR3	3	4	0.0183301405279576
884	HSP90B1	2	1	0.0183280897028872
885	RPL8	2	1	0.0183232665991116
886	ATP2B1	2	1	0.018316061752145
887	RAI14	2	1	0.018315134389648
888	MTA2	3	4	0.0183145945683122
889	SRSF5	3	4	0.018311815625185
890	ALDH3A2	2	1	0.0183096590634336
891	DNAJC25	2	1	0.0182992449666265
892	CLIC4	3	4	0.0182989960648603
893	UBE2E3	3	4	0.0182895610228547
894	YWHAB	1	3	0.0182877549328715
895	TCF7L2	2	1	0.0182785600693589
896	ENSMMUG00000061824	2	1	0.0182729091947068
897	DSTN	2	1	0.0182587067649525
898	RALBP1	2	1	0.0182582854527266
899	LDLRAD3	2	1	0.0182542848281716
900	PLXNB2	2	1	0.0182530399609911
901	MIB1	2	1	0.0182493362199318
902	PRMT5	2	1	0.0182470496244789
903	MBTPS1	3	4	0.0182430156184306
904	SLC25A46	2	1	0.0182399759148566
905	CELF2	2	1	0.0182381374719468
906	HNRNPR	3	4	0.0182340678741741
907	ARHGAP11A	2	1	0.0182338591741525
908	RPS17	3	4	0.0182223022365928
909	SMC3	3	4	0.0182178807251857
910	TOPBP1	3	4	0.0182169857624841
911	NRN1	2	1	0.0182121689995978
912	PCDHAC2	2	1	0.0182065986959759
913	QKI	2	1	0.0182012346446398
914	BCL2L2.PABPN1	3	4	0.0181963762985715
915	PAIP2	2	1	0.0181916637533196
916	GABARAP	2	1	0.0181878726823671
917	ATP6	3	4	0.0181773950163968
918	RC3H2	3	4	0.018175126301599
919	SIPA1L2	2	1	0.0181743299185813
920	PPP4R2	2	1	0.0181706127678991
921	SDHAF4	2	1	0.018168214575785
922	PPID	3	4	0.0181643020810336
923	ASAP2	2	1	0.0181618454540364
924	NGRN	2	1	0.0181612243063572
925	DNAJB6	2	1	0.0181576094868645
926	IGF2BP2	2	1	0.0181526642948399
927	MRFAP1	2	1	0.0181461560391594
928	COPB2	2	1	0.0181343403631457
929	RAB7A	3	4	0.0181281775643445
930	RPL18	2	1	0.0181169534558118
931	THRAP3	2	1	0.018114685704398
932	ZMYM2	3	4	0.0181131432594638
933	CUL4A	3	4	0.0181124067262758
934	AFDN	2	1	0.0181087147617214
935	NSG2	2	1	0.0181048386876476
936	NKTR	3	4	0.0180979653644757
937	MEN1	2	1	0.018096939965523
938	ENSMMUG00000001458	3	4	0.0180954142098297
939	ZNF428	2	1	0.0180827190472247
940	EIF3I	2	1	0.0180802234410872
941	RBBP4	3	4	0.0180739033486882
942	IDE	2	1	0.0180735393249707
943	MOB4	2	1	0.0180715097878178
944	RPL27A	3	4	0.0180701343160703
945	AP1S1	2	1	0.0180690593321861
946	ATF6B	3	4	0.0180660334819838
947	ATP5MC3	2	1	0.0180635818731748
948	TCF12	3	4	0.0180572247691055
949	SEC61G	3	4	0.0180554988183897
950	PRDX3	2	1	0.0180456486234371
951	ENSMMUG00000054067	2	1	0.0180351709627616
952	VRK1	3	4	0.0180346094398235
953	SLC29A1	2	1	0.0180333981137839
954	TPP2	2	1	0.018030212081351
955	RBPJ	2	1	0.0180269978436482
956	NDUFB2	2	1	0.0180108865349391
957	SFRP1	2	1	0.0180071052419148
958	SUPT20H	3	4	0.018003539042305
959	CACYBP	2	1	0.0179937101714845
960	ENSMMUG00000010630	2	1	0.0179896035873396
961	ARF1	1	3	0.017981992182538
962	PIANP	3	4	0.0179704652086581
963	GSK3A	2	1	0.0179671544679206
964	ACTR3	3	4	0.0179625245213584
965	LAPTM4B	2	1	0.0179598444806147
966	DHPS	2	1	0.0179576122486286
967	DHX30	3	4	0.0179543248253353
968	B2M	2	1	0.0179490012469347
969	CCDC50	2	1	0.0179338840538901
970	ENSMMUG00000050473	2	1	0.0179329036898936
971	CTTNBP2NL	2	1	0.0179202335254764
972	COX4I1	2	1	0.0179123743731012
973	PRC1	3	4	0.017909845817537
974	DYNLL2	2	1	0.0179085947791134
975	ZNF423	2	1	0.0179039826214037
976	ENSMMUG00000028689	2	1	0.0179005606891389
977	BCOR	3	4	0.0178991122372485
978	DPY30	3	4	0.0178952061550476
979	B4GALT5	2	1	0.0178946604838579
980	ILF2	2	1	0.0178833904998281
981	ANAPC13	2	1	0.0178829768621592
982	RPL22	3	4	0.0178771064322107
983	MAD2L1	2	1	0.0178764098463155
984	TM9SF3	2	1	0.0178628823474186
985	FHL1	3	4	0.0178561500462645
986	RPS17	2	1	0.017852917630958
987	RPS23	3	4	0.0178466805342406
988	GNL2	2	1	0.0178459282422178
989	U2SURP	2	1	0.0178457569347756
990	CFL1	1	3	0.0178437289978254
991	HMGB1	3	4	0.0178431248961563
992	ENSMMUG00000049324	2	1	0.0178422753527812
993	PHLPP1	2	1	0.0178412554853764
994	ACTR10	1	3	0.0178322251675017
995	ENSMMUG00000030508	3	4	0.017826068110956
996	PRDX1	3	4	0.0178239297402737
997	EIF4EBP2	3	4	0.0178233602017648
998	ARID1A	3	4	0.0178119422658057
999	PPP3CA	3	4	0.0178118706410786
1000	COPB2	3	4	0.0178059025122761
1001	SEC61G	2	1	0.0178051530618383
1002	CERK	2	1	0.017794530208142
1003	PBRM1	3	4	0.0177924637373692
1004	CALCOCO2	1	3	0.0177916752485103
1005	H2AFZ	2	1	0.0177859162247103
1006	NDUFA5	2	1	0.0177845898032571
1007	ENSMMUG00000020930	2	1	0.0177748832284967
1008	ACAD10	3	4	0.0177636874073309
1009	ATF4	3	4	0.0177479561414005
1010	ARHGAP21	3	4	0.0177379694916781
1011	EZR	3	4	0.0177321801063489
1012	SETD7	3	4	0.017730363765297
1013	SPCS2	3	4	0.0177220053551589
1014	CSNK1A1	2	1	0.017717647633145
1015	PAFAH1B1	3	4	0.0177164474216536
1016	NUDT3	1	3	0.017714968203579
1017	QSER1	1	3	0.017714309954878
1018	STMN2	3	4	0.0177121036282069
1019	PRRC2A	2	1	0.0177023765734079
1020	ZBTB4	2	1	0.0177013535753964
1021	FRA10AC1	3	4	0.0177002673989137
1022	H2AFZ	3	4	0.0176999848515121
1023	ENSMMUG00000064760	3	4	0.0176996029695051
1024	PER1	2	1	0.0176949160780243
1025	FXR2	3	4	0.0176927551159873
1026	MYEF2	2	1	0.017692284116455
1027	ENSMMUG00000065246	3	4	0.0176862082700091
1028	ANXA5	2	1	0.0176754130891631
1029	DMRTA2	2	1	0.0176745590263022
1030	DHX36	3	4	0.0176670939419133
1031	CNOT8	2	1	0.0176579300183063
1032	NCAM1	2	1	0.0176563012183626
1033	TTYH3	2	1	0.0176445477571516
1034	HNRNPM	2	1	0.017643119892627
1035	UBL3	2	1	0.0176427107267266
1036	GSTT2B	2	1	0.0176383563059465
1037	MRPL35	2	1	0.0176366299990581
1038	MFSD14B	2	1	0.0176161255096392
1039	ACLY	2	1	0.017614002630797
1040	SORBS2	2	1	0.0176139171894506
1041	MED13L	2	1	0.0176110436372031
1042	CDK4	2	1	0.0176056727525512
1043	MAP1LC3B	2	1	0.0175939381577355
1044	EIF4E2	2	1	0.0175901649590189
1045	ENSMMUG00000016894	2	1	0.017589485918951
1046	CEP97	2	1	0.0175843097982508
1047	ZNF195	3	4	0.0175831752359981
1048	G3BP2	2	1	0.0175616051983367
1049	LTV1	2	1	0.0175583859441183
1050	TTC3	2	1	0.017557045031192
1051	SSBP1	3	4	0.0175556069301328
1052	GOLGA7	2	1	0.0175552204414255
1053	FKBP4	2	1	0.0175519306361274
1054	TRIM28	3	4	0.0175497704626915
1055	STAR	2	1	0.0175482975666789
1056	ACTR10	2	1	0.0175443588817071
1057	TMSB10	2	1	0.0175418379930303
1058	ENSMMUG00000032410	2	1	0.017538566274526
1059	AHSA1	3	4	0.0175375809340646
1060	FMC1.LUC7L2	3	4	0.0175260526707823
1061	MLLT3	2	1	0.0175238757775898
1062	COX4I1	3	4	0.0175159513611078
1063	CCT6A	2	1	0.0175109142261144
1064	TOMM7	1	3	0.0175079543676457
1065	RPS26	1	3	0.0175063265937119
1066	ARPC3	3	4	0.0175050277817058
1067	BSCL2	2	1	0.0175028066796327
1068	NDUFAF4	1	3	0.0174960055447954
1069	CSDE1	2	1	0.0174933895849096
1070	APC2	2	1	0.0174823757292423
1071	ERICH1	1	3	0.0174809910234074
1072	POLDIP3	2	1	0.0174768697855862
1073	SF1	3	4	0.0174722675599027
1074	FADS2	2	1	0.0174644393153488
1075	ENSMMUG00000002926	2	1	0.0174608564992018
1076	FBXO21	2	1	0.0174596338222311
1077	MTREX	2	1	0.0174594010948954
1078	NAA35	2	1	0.0174571659438797
1079	ACTR3	2	1	0.0174557243270617
1080	MRPL51	3	4	0.0174555563913234
1081	RBBP7	2	1	0.0174554194211946
1082	MSH6	2	1	0.0174518539964557
1083	CLIP3	3	4	0.0174506969053981
1084	CALU	3	4	0.0174470984966193
1085	ZCRB1	2	1	0.0174414673236423
1086	DPH3	2	1	0.0174395364160861
1087	SMIM15	3	4	0.0174378108889378
1088	MRPL49	3	4	0.01743773178115
1089	TARDBP	2	1	0.0174356859879015
1090	ENSMMUG00000040145	3	4	0.0174248874587633
1091	ARIH1	2	1	0.0174237789854697
1092	CDK2AP1	3	4	0.0174236969313804
1093	ZKSCAN1	1	3	0.0174229291972541
1094	ACAD10	2	1	0.0174221604502327
1095	KIAA2026	2	1	0.0174114596855544
1096	PARP6	2	1	0.0174100278725952
1097	ZBED5	2	1	0.0174091800826164
1098	SPAST	2	1	0.0174074539203158
1099	TMOD2	2	1	0.0174064695174477
1100	FOS	2	1	0.0174013024864349
1101	RRM1	2	1	0.0173998957590808
1102	STK25	2	1	0.0173943261877975
1103	CUX1	2	1	0.0173903144682338
1104	ENSMMUG00000052536	3	4	0.0173863363668748
1105	MTMR3	3	4	0.0173848169368899
1106	NRN1	3	4	0.0173817085324082
1107	RTN1	2	1	0.0173775312744956
1108	NT5DC2	2	1	0.0173775145690315
1109	SREK1	2	1	0.0173713903926653
1110	BRCA1	2	1	0.0173704163166993
1111	YWHAH	2	1	0.0173694063117692
1112	PAK2	3	4	0.0173644507799048
1113	PBRM1	2	1	0.0173632373842156
1114	ZNF451	3	4	0.0173612928289196
1115	CAPZB	3	4	0.0173574589371385
1116	EIF3M	2	1	0.0173480270644791
1117	EIF2S1	2	1	0.0173378549631416
1118	ADNP	2	1	0.0173365705534998
1119	AKT1	2	1	0.0173320302557247
1120	MARCHF6	3	4	0.0173308671942721
1121	CFDP1	2	1	0.0173282335949091
1122	SRRM2	3	4	0.0173265577792472
1123	IDH1	3	4	0.0173223941946027
1124	NDUFS2	2	1	0.0173189207846346
1125	SEPTIN8	3	4	0.0173181803409498
1126	PJA2	2	1	0.017300222415045
1127	ENSMMUG00000052946	2	1	0.0172982626658784
1128	WIPI2	2	1	0.0172913434626485
1129	EI24	2	1	0.0172904741975366
1130	AGO1	2	1	0.0172886309607155
1131	STT3A	2	1	0.017281859989901
1132	ATP6	1	3	0.0172741577513754
1133	DIDO1	3	4	0.0172727472167131
1134	USP14	3	4	0.0172649635803015
1135	ENSMMUG00000063637	3	4	0.0172579860078474
1136	DST	2	1	0.0172577156171242
1137	PPP2CB	2	1	0.0172563818895562
1138	TRIM13	2	1	0.0172544911490828
1139	PRRC2B	2	1	0.0172518761631044
1140	C4H6orf136	2	1	0.0172446230212113
1141	MIDN	3	4	0.0172409678694641
1142	EIF4A1	3	4	0.0172394770327367
1143	ENSMMUG00000041688	3	4	0.0172392926704948
1144	PPM1G	3	4	0.0172275464171225
1145	SCHIP1	2	1	0.0172272981394982
1146	SRSF1	3	4	0.0172244593170745
1147	SLC38A1	2	1	0.017220818917862
1148	BOD1	2	1	0.0172136729831441
1149	PSMB5	3	4	0.0172078922295233
1150	NAA20	2	1	0.0172027549023879
1151	MRPL52	2	1	0.0171969617535288
1152	EIF2AK1	2	1	0.0171913795426776
1153	PRDM2	2	1	0.0171906051560505
1154	NUMA1	2	1	0.0171858560591695
1155	DNMT1	3	4	0.0171831871358687
1156	NSA2	3	4	0.0171812399671715
1157	DYNLL1	2	1	0.0171804665650743
1158	BRMS1L	2	1	0.017177443932392
1159	VEZT	2	1	0.017174725049793
1160	SLC35B1	3	4	0.017172870358767
1161	SRSF6	2	1	0.0171675923892125
1162	CDC123	2	1	0.0171618799521178
1163	PLXNA2	3	4	0.0171575173081026
1164	LSM14A	1	3	0.0171530324163787
1165	TOX4	2	1	0.0171520135794294
1166	NNT	2	1	0.0171458283857854
1167	RAD17	2	1	0.0171406186836486
1168	ZFAND6	2	1	0.017136459640767
1169	TSPAN3	2	1	0.017135559244331
1170	ERP29	2	1	0.0171283298820295
1171	COX5B	2	1	0.0171223459118518
1172	HNRNPL	3	4	0.0171188922566782
1173	DPYSL2	3	4	0.0171126897437805
1174	TOMM20	2	1	0.017110768545249
1175	TCAF1	2	1	0.0171103458867453
1176	MTCH2	3	4	0.017109307043151
1177	SKA2	3	4	0.0171005970827572
1178	ARF1	2	1	0.0170978541596111
1179	CASP8AP2	2	1	0.017090145144692
1180	WDR41	2	1	0.0170834969938231
1181	RPL22L1	2	1	0.0170826157421765
1182	HDHD2	1	3	0.0170787721123155
1183	MTCH2	2	1	0.0170782231337196
1184	TAF15	2	1	0.0170750636254786
1185	ENSMMUG00000039070	1	3	0.0170742220987066
1186	CCT8	2	1	0.0170740533274984
1187	FUBP1	2	1	0.017068968129875
1188	CETN3	3	4	0.0170619971461047
1189	THRAP3	3	4	0.0170581598170074
1190	RDH11	3	4	0.0170570176755124
1191	YWHAB	3	4	0.0170522118892429
1192	KDM1A	3	4	0.0170473408130194
1193	NSG2	1	3	0.0170456180817706
1194	ZNF189	2	1	0.0170425899083025
1195	TIMM23	2	1	0.0170359753609002
1196	EHMT2	2	1	0.0170333353287084
1197	PAPOLA	2	1	0.0170328785193686
1198	ATP5PO	1	3	0.0170311345443547
1199	MAPRE1	3	4	0.0170302391586033
1200	LDHB	2	1	0.017030080169367
1201	ENSMMUG00000017231	2	1	0.017022843868761
1202	AFTPH	3	4	0.0170207585960205
1203	CNN3	2	1	0.0170174880666558
1204	SRR	3	4	0.0170172518466856
1205	WAPL	2	1	0.0170161872640232
1206	NISCH	3	4	0.0170123803551399
1207	BRPF1	3	4	0.0170119448064938
1208	VPS72	2	1	0.017009827181888
1209	POLG	3	4	0.0170083369016647
1210	RRAGA	3	4	0.0169963897267703
1211	DPH2	3	4	0.0169950418452517
1212	NASP	3	4	0.0169942779006576
1213	TLK2	2	1	0.0169888254060914
1214	SON	1	3	0.016987371988387
1215	HDGFL3	2	1	0.0169858054051766
1216	ZMYM2	2	1	0.0169799748663317
1217	CDKN2C	3	4	0.0169796058168821
1218	DNAJC8	2	1	0.0169793232375119
1219	HMGA1	3	4	0.016976222269028
1220	LSM5	2	1	0.0169659760584887
1221	TMTC4	3	4	0.0169650143907852
1222	EP300	3	4	0.0169611529899745
1223	CDC5L	2	1	0.0169567449816254
1224	SPINDOC	2	1	0.0169563769262523
1225	HMGB2	3	4	0.0169533230722199
1226	VAPA	2	1	0.0169523647811916
1227	Metazoa-SRP	3	4	0.0169504014257525
1228	IVNS1ABP	2	1	0.0169485278038153
1229	SPECC1L	2	1	0.0169471918149317
1230	RPL12	3	4	0.0169453727846297
1231	ENSMMUG00000053116	3	4	0.0169433675573056
1232	GON4L	2	1	0.0169391148271035
1233	ENSMMUG00000053555	2	1	0.0169331226791822
1234	URB2	2	1	0.0169318819714449
1235	ND3	3	4	0.016925139267171
1236	ATP5F1E	3	4	0.0169235427263958
1237	TCAF1	3	4	0.0169147480579066
1238	SH3BGRL	2	1	0.0169082813619233
1239	TMEM50B	1	3	0.0169063906610776
1240	TMEM14B	3	4	0.016899957221222
1241	RPL10A	3	4	0.0168998937536817
1242	GNAI3	3	4	0.0168972129911724
1243	RPL31	1	3	0.0168938481149772
1244	IREB2	2	1	0.0168931699127155
1245	CD46	1	3	0.0168814312871268
1246	DPYSL2	2	1	0.0168780811722518
1247	NDUFC2	3	4	0.0168765204316072
1248	CLTC	3	4	0.0168753505103465
1249	COMMD6	2	1	0.0168664896824172
1250	TUBB3	3	4	0.0168661803165419
1251	RPS24	3	4	0.016865983437012
1252	ENSMMUG00000056113	3	4	0.0168617839011182
1253	FKBP1A	3	4	0.0168544700979261
1254	SNX5	2	1	0.0168538413389016
1255	BTF3	3	4	0.0168397352479096
1256	ITM2B	3	4	0.0168394068542824
1257	ARHGAP33	1	3	0.0168391679168193
1258	ARID2	2	1	0.0168267420029335
1259	NDUFB2	3	4	0.0168266304405751
1260	HNRNPM	3	4	0.0168241062935161
1261	NRAS	2	1	0.0168216676556085
1262	SLC25A36	2	1	0.0168188154008589
1263	ELAVL2	2	1	0.0168163107285664
1264	NDUFAB1	2	1	0.0168088187003783
1265	ETF1	2	1	0.0167969210863626
1266	ENSMMUG00000061385	2	1	0.0167965627485964
1267	ENSMMUG00000031981	3	4	0.0167961002583801
1268	PNN	3	4	0.0167900007342138
1269	MMP14	2	1	0.0167884098003027
1270	TRIM52	3	4	0.0167842752985044
1271	VIRMA	3	4	0.0167835095787714
1272	TMEM30A	3	4	0.0167831149825324
1273	FMR1	2	1	0.016782895483381
1274	CAPZA2	2	1	0.016781822224473
1275	ENSMMUG00000053392	1	3	0.0167813189047515
1276	AKIRIN2	2	1	0.0167761687658935
1277	THAP5	2	1	0.0167761594412006
1278	YWHAE	3	4	0.0167756540006492
1279	NET1	2	1	0.0167717297412827
1280	ZMAT2	2	1	0.0167683794772551
1281	NEMF	2	1	0.0167631396528666
1282	ENSMMUG00000065373	2	1	0.0167609417138229
1283	TSN	2	1	0.016757318633243
1284	NUP62	3	4	0.0167561503027756
1285	CCNG2	3	4	0.0167539946889131
1286	TMEM70	3	4	0.0167539033819622
1287	PFKM	3	4	0.0167497809301158
1288	MCM2	2	1	0.0167454885824538
1289	ARMCX1	3	4	0.0167422983902875
1290	RRP36	3	4	0.016738155196339
1291	CKB	2	1	0.0167353826650666
1292	CREBBP	2	1	0.0167342920581583
1293	UBE2K	3	4	0.0167334308522143
1294	TYW3	1	3	0.0167325027553365
1295	UCHL3	2	1	0.0167303108632821
1296	RPS16	3	4	0.0167258400204868
1297	THTPA	2	1	0.0167254547543854
1298	OGA	3	4	0.0167221435193246
1299	MRPS12	2	1	0.0167213849067866
1300	MAGED2	2	1	0.0167189606028342
1301	CCNG2	2	1	0.0167148703261895
1302	MFN1	2	1	0.0167072174988806
1303	GPM6A	3	4	0.0167058279634791
1304	SMARCC1	2	1	0.0167058175981824
1305	ENY2	2	1	0.0167038725090983
1306	UBR7	2	1	0.016702657446528
1307	TRAPPC4	2	1	0.0167002492243557
1308	MRPL18	2	1	0.0167000754761423
1309	KIF15	2	1	0.0166999730196605
1310	FGF13	2	1	0.0166955986300486
1311	AKR1B1	2	1	0.0166945113631313
1312	P4HB	2	1	0.0166876730117767
1313	SCFD1	2	1	0.0166845568140799
1314	CCT4	2	1	0.0166836368464185
1315	PGK1	2	1	0.0166755950359878
1316	PSMA4	3	4	0.016673926877358
1317	MARCHF6	2	1	0.0166685348073845
1318	NFIX	2	1	0.016668266639662
1319	SF3B4	2	1	0.0166635955671749
1320	HDHD2	2	1	0.0166605329810312
1321	FAU	3	4	0.0166597881522751
1322	NFE2L2	2	1	0.0166584979377454
1323	ZNF93	2	1	0.0166547287469669
1324	BEX4	3	4	0.0166534449274594
1325	ERGIC3	2	1	0.0166379662245394
1326	SNN	2	1	0.0166370021491111
1327	CLIP3	2	1	0.0166368346619909
1328	FAM89B	3	4	0.0166365069362637
1329	BCL7A	3	4	0.0166272983480102
1330	LMO4	2	1	0.0166221726136809
1331	DDX39B	2	1	0.0166220708391629
1332	PTOV1	2	1	0.016618607961525
1333	BEX4	2	1	0.0166156277520076
1334	ENSMMUG00000049324	3	4	0.0166146541782158
1335	SOD1	2	1	0.0166074186929126
1336	TXNIP	2	1	0.0166019836058072
1337	MTIF2	2	1	0.0165989052568239
1338	APLP2	2	1	0.0165964978346145
1339	HEATR5B	2	1	0.0165964967759328
1340	WDR1	1	3	0.0165952479224409
1341	UBA3	2	1	0.0165896422572349
1342	BAZ2B	2	1	0.0165885901821625
1343	KLHL23	3	4	0.016584150506697
1344	ACVR2A	2	1	0.0165835883818276
1345	NDUFB2	1	3	0.0165834011498831
1346	CARHSP1	2	1	0.0165823298873305
1347	BLCAP	2	1	0.016581494068593
1348	TIMM21	2	1	0.0165803272341881
1349	ELAVL2	3	4	0.0165777842267732
1350	ADD3	2	1	0.0165675498103947
1351	DNER	2	1	0.0165672714598287
1352	HNRNPA1	3	4	0.0165668441239471
1353	BZW1	2	1	0.0165667647223826
1354	CTTNBP2	2	1	0.0165667354220399
1355	HECTD3	2	1	0.0165666155522866
1356	ENSMMUG00000012440	3	4	0.0165653654186655
1357	SYT4	1	3	0.0165639197427437
1358	TMTC4	2	1	0.0165636278897105
1359	RAB5B	2	1	0.0165631390680331
1360	SPTLC1	2	1	0.0165616201377012
1361	WRN	1	3	0.0165608743232206
1362	ENSMMUG00000030408	3	4	0.0165559339086621
1363	ATP5F1A	2	1	0.0165552185563332
1364	POLR2B	2	1	0.016549056460544
1365	KIF3C	2	1	0.0165478061172815
1366	CENPF	2	1	0.0165446456381872
1367	PCMT1	2	1	0.0165436505711747
1368	MDM2	2	1	0.01654322230726
1369	MTPN	3	4	0.0165388163143759
1370	KHDRBS1	3	4	0.0165333047845552
1371	DDX5	3	4	0.0165331603148199
1372	NEMF	3	4	0.0165251576688462
1373	RPL3	2	1	0.0165246908683252
1374	ENSMMUG00000006283	2	1	0.0165239759735282
1375	THOC2	3	4	0.016521587818826
1376	SREBF2	1	3	0.0165174784031614
1377	ENSMMUG00000000671	3	4	0.0165120000392481
1378	PNPT1	3	4	0.016511938120224
1379	ERG28	3	4	0.0165114922484332
1380	HMGA1	2	1	0.0165087349272821
1381	LSM14B	2	1	0.016505452352949
1382	IRF2BP2	3	4	0.0165023840299664
1383	PHF12	2	1	0.0164946502669567
1384	RB1CC1	2	1	0.0164932298068498
1385	UBE4A	2	1	0.0164926619210217
1386	PPP2R2A	2	1	0.0164917548382386
1387	ZNF322	2	1	0.016486888811947
1388	EIF3K	2	1	0.0164865893691826
1389	NCOR1	3	4	0.0164785128304776
1390	RPS3A	3	4	0.0164752604816903
1391	FKBP8	2	1	0.0164748484754505
1392	DDX3X	2	1	0.0164702606196863
1393	YY1	3	4	0.0164693364614905
1394	PPIB	2	1	0.0164658785846724
1395	TMEM230	2	1	0.0164647460672593
1396	RSL24D1	3	4	0.0164591013433102
1397	UNC119B	2	1	0.0164552158039916
1398	ELAVL4	2	1	0.0164533056493938
1399	EIF4EBP3	3	4	0.016452816710185
1400	SNRPB2	2	1	0.0164508067062691
1401	RPL15	3	4	0.016446076014125
1402	ENSMMUG00000012140	3	4	0.0164419007061659
1403	HNRNPH2	1	3	0.0164404274065788
1404	SUPT16H	3	4	0.0164403038741881
1405	UPF3A	2	1	0.0164352655958879
1406	STX7	2	1	0.0164307005317343
1407	RBM5	1	3	0.0164298533753346
1408	PRPF19	2	1	0.0164204360623254
1409	ARL8A	2	1	0.0164193546207844
1410	PTPRZ1	2	1	0.0164125024043106
1411	TAF3	2	1	0.0164065620762802
1412	TWSG1	2	1	0.0164000344355728
1413	FBXO11	2	1	0.0163971280180118
1414	ENSMMUG00000006608	3	4	0.0163915184475749
1415	HNRNPDL	2	1	0.0163869403835007
1416	COMMD3	3	4	0.0163807353711765
1417	OSBP	2	1	0.0163805817453144
1418	CEMIP2	2	1	0.0163781546535546
1419	CWC27	2	1	0.016377270191438
1420	PCMTD2	2	1	0.0163740490278355
1421	ENSMMUG00000023620	3	4	0.0163732269320865
1422	ENSMMUG00000019832	3	4	0.0163694231553788
1423	ENSMMUG00000062350	2	1	0.0163677048662303
1424	MGST3	1	3	0.0163675419414742
1425	CERK	1	3	0.0163633417675892
1426	CCAR1	3	4	0.016356053085593
1427	CAPZB	2	1	0.0163553325138733
1428	UBXN1	3	4	0.0163521590709692
1429	SMG1	2	1	0.0163474216224775
1430	MED4	3	4	0.0163429716498467
1431	ARF4	3	4	0.0163395609603848
1432	DYNLL1	3	4	0.0163385154068306
1433	MED21	2	1	0.01633587123605
1434	RPS13	3	4	0.0163355486175158
1435	SRSF5	2	1	0.0163343448193084
1436	DPYSL3	2	1	0.0163264612229568
1437	TMCO1	2	1	0.0163221645857266
1438	ATRX	3	4	0.0163199744621357
1439	PPME1	2	1	0.0163187014339193
1440	MXI1	2	1	0.0163160345156623
1441	PRMT2	2	1	0.0163106057417688
1442	CCT5	2	1	0.0163096515480467
1443	SUMO1	3	4	0.0163058559011527
1444	HSPA8	3	4	0.0163011966617364
1445	UBQLN4	3	4	0.0163007207903235
1446	TPX2	2	1	0.0162906453493146
1447	H2AZ2	2	1	0.016286614074604
1448	CAMK2N1	2	1	0.0162771748461717
1449	TSPAN3	3	4	0.0162756368392592
1450	QSER1	2	1	0.0162716900661333
1451	ZC3H14	2	1	0.016270282046553
1452	DDX1	2	1	0.0162701432913574
1453	ENSMMUG00000006206	2	1	0.0162692724286969
1454	ENSMMUG00000023311	3	4	0.0162691083060593
1455	BASP1	2	1	0.0162649699696985
1456	BOD1L1	2	1	0.0162640575074594
1457	RPL13	3	4	0.0162574454829544
1458	EEF2	2	1	0.0162560514745333
1459	DDX18	3	4	0.016251751019806
1460	SNRPD1	2	1	0.0162499908158172
1461	CREB5	1	3	0.0162487095757586
1462	KIF3B	3	4	0.0162367455451706
1463	CBFA2T2	2	1	0.0162313308859442
1464	PTPRA	2	1	0.0162286852550177
1465	ENSMMUG00000018240	2	1	0.0162271692335309
1466	CALCOCO2	2	1	0.0162262438497514
1467	BZW2	1	3	0.0162236086149924
1468	EBNA1BP2	2	1	0.0162234825373695
1469	CLASP2	2	1	0.0162215351257235
1470	GSTM4	3	4	0.0162171871983505
1471	PCBP1	3	4	0.0162171411624662
1472	SAT2	2	1	0.0162156772644188
1473	ENSMMUG00000012419	1	3	0.0162127297191778
1474	ADSS2	2	1	0.0162110361114001
1475	SMAD5	2	1	0.0162103492607081
1476	FAM98B	2	1	0.0162089047064504
1477	FDFT1	2	1	0.0162080357429708
1478	TDRD3	2	1	0.016197393886925
1479	RPL6	3	4	0.0161972488353778
1480	FKBP3	1	3	0.016192699966402
1481	VDAC1	2	1	0.0161920264624042
1482	ZNF292	3	4	0.016174676761795
1483	CREB1	2	1	0.0161724197159574
1484	ROCK1	2	1	0.0161705457010716
1485	CCDC66	2	1	0.0161685647499969
1486	NOP10	3	4	0.0161664037767199
1487	ENSMMUG00000014256	3	4	0.0161659325151005
1488	AQR	2	1	0.0161646199215995
1489	ENSMMUG00000029973	3	4	0.0161540009366372
1490	LARP7	2	1	0.0161528414059281
1491	TCF4	3	4	0.0161506264948737
1492	SPTBN1	2	1	0.0161470482531808
1493	MAP2K4	2	1	0.0161437422523945
1494	ENSMMUG00000059829	2	1	0.0161422694016975
1495	SNRNP70	3	4	0.0161361293737512
1496	RNF113A	3	4	0.0161361080130772
1497	NUP133	1	3	0.0161341308998144
1498	SMPD4	3	4	0.0161310702726901
1499	CDH2	2	1	0.0161308916549042
1500	WDR6	2	1	0.0161243474631924
1501	RLIM	2	1	0.0161193171229395
1502	UBQLN4	2	1	0.0161190581169964
1503	CLDND1	3	4	0.0161174735406606
1504	ENSMMUG00000058919	2	1	0.0161087015283463
1505	RYBP	3	4	0.016108441606666
1506	CDC42EP4	2	1	0.0161081190371634
1507	ENSMMUG00000053163	2	1	0.0161049723537202
1508	ATXN10	2	1	0.0161026000399785
1509	SLAIN2	2	1	0.0161006116585778
1510	STOML2	2	1	0.0160995502603349
1511	RAB1B	2	1	0.0160975819991552
1512	FAM107B	2	1	0.0160975298969488
1513	ARHGDIA	2	1	0.0160909232234634
1514	LRP8	3	4	0.0160904396635242
1515	DAAM1	2	1	0.0160892290578048
1516	LSM14A	3	4	0.0160886730736717
1517	MEMO1	2	1	0.0160882364481381
1518	CPEB4	3	4	0.0160861969041403
1519	DCBLD2	2	1	0.0160850067937585
1520	TFCP2	2	1	0.0160832393929834
1521	RPS2	2	1	0.0160814527525854
1522	RIOK3	3	4	0.0160789263555493
1523	RTRAF	3	4	0.0160768428756595
1524	LRP1	2	1	0.0160659881606073
1525	HDGF	2	1	0.0160639339042839
1526	SEPTIN9	3	4	0.0160631946154366
1527	ENSMMUG00000018240	3	4	0.0160627020743475
1528	BRCC3	3	4	0.0160539912384919
1529	AIMP1	2	1	0.0160517297950931
1530	FARP1	3	4	0.0160453132636543
1531	DDX50	3	4	0.0160446559787174
1532	CKAP2L	1	3	0.0160444426002483
1533	RPS6	1	3	0.0160398189195316
1534	ENSMMUG00000052536	2	1	0.0160395334819138
1535	ATXN7L3B	2	1	0.0160363361152738
1536	GNPDA1	2	1	0.0160359668568435
1537	GSK3A	3	4	0.0160285727081926
1538	ROS1	3	4	0.0160279487325544
1539	SKP2	2	1	0.0160267077614276
1540	GATAD2B	2	1	0.0160258865258612
1541	MARK1	3	4	0.016025264817066
1542	PCIF1	2	1	0.0160230542923008
1543	TPGS2	2	1	0.0160190916981866
1544	ACTB	1	3	0.0160111572892208
1545	LRP1	3	4	0.0160051312036483
1546	ERBB3	3	4	0.015996180317206
1547	EEF1B2	1	3	0.0159961790875822
1548	CENPE	2	1	0.0159949450357512
1549	RND3	2	1	0.0159880169178195
1550	PRKRA	2	1	0.0159869584250517
1551	NONO	3	4	0.0159854893830332
1552	TBR1	1	3	0.0159792227818651
1553	ABI2	3	4	0.015974487915138
1554	ENSMMUG00000000186	2	1	0.0159743120412855
1555	C10H20orf24	2	1	0.0159682534043606
1556	RPL38	3	4	0.0159673803873525
1557	PCNP	2	1	0.0159554956135939
1558	CYC1	2	1	0.0159476024720604
1559	KDM5C	2	1	0.0159456735548311
1560	SMARCC1	3	4	0.0159409450697485
1561	BAHCC1	2	1	0.0159390242302554
1562	ERBIN	3	4	0.0159368489651039
1563	SIN3A	2	1	0.015933451539982
1564	CWC27	3	4	0.0159318366537494
1565	MEST	2	1	0.0159269477187789
1566	TPM4	2	1	0.0159262076820707
1567	ENSMMUG00000003130	2	1	0.0159244180683378
1568	KARS1	3	4	0.0159226802640886
1569	NOP10	2	1	0.0159179556480753
1570	KIF22	1	3	0.0159179129040026
1571	DDX6	2	1	0.015902151608909
1572	OS9	2	1	0.0159007818450066
1573	PHF14	2	1	0.0158948179211545
1574	MRPL9	2	1	0.0158942449634109
1575	CNOT7	3	4	0.0158940572903397
1576	FKBP2	3	4	0.0158934132897724
1577	ENSMMUG00000011580	3	4	0.0158909876778865
1578	ENSMMUG00000012419	2	1	0.0158837622603801
1579	POLR2E	3	4	0.0158833461148268
1580	DKC1	2	1	0.015874429063402
1581	MAP2K4	3	4	0.0158741739904054
1582	DDOST	2	1	0.0158694179758107
1583	EIF5B	2	1	0.0158674368603319
1584	JUND	2	1	0.015865429824078
1585	ENSMMUG00000053770	3	4	0.015863583467388
1586	TMEM115	1	3	0.0158594064294121
1587	ARMCX3	3	4	0.0158486126412506
1588	PIAS1	2	1	0.0158428397208178
1589	STAM	2	1	0.0158288550399713
1590	CKAP5	2	1	0.0158266531026104
1591	NOP58	3	4	0.0158212667638389
1592	ZC3H7A	2	1	0.0158195080988722
1593	SAP18	3	4	0.0158162857072133
1594	EIF5	2	1	0.0158152834089039
1595	COPA	2	1	0.0158139264975567
1596	GOLGA2	2	1	0.0158120463361578
1597	ABHD16A	1	3	0.0158058837486931
1598	ENSMMUG00000021075	3	4	0.0158013483687128
1599	POLE3	2	1	0.0158011434586718
1600	RPS8	1	3	0.0157996353294425
1601	TMEM47	2	1	0.0157925873711842
1602	CSTF3	1	3	0.0157898207869606
1603	CHAF1A	2	1	0.0157872822265596
1604	MYH10	2	1	0.015781325881407
1605	OSTC	2	1	0.015779896723613
1606	CSNK1A1	3	4	0.0157772105419407
1607	PREPL	3	4	0.0157770724352142
1608	MED6	2	1	0.015774404281897
1609	PIP4K2B	2	1	0.0157729473405172
1610	ZBTB20	2	1	0.0157725593464934
1611	CEP57L1	3	4	0.0157722030934144
1612	ARHGAP33	2	1	0.0157647755328696
1613	ENSMMUG00000001858	3	4	0.0157635975129218
1614	ASPH	2	1	0.0157627810463009
1615	HBP1	2	1	0.0157626310134346
1616	ATP6V0E1	2	1	0.0157549878650547
1617	TNRC6B	3	4	0.0157495529745563
1618	USP11	2	1	0.01574216056584
1619	PECR	2	1	0.0157408745904978
1620	ENSMMUG00000003073	2	1	0.0157400907150365
1621	UBE2G2	2	1	0.0157397430590147
1622	NOL11	3	4	0.0157397004982838
1623	HSP90AA1	2	1	0.0157378751250292
1624	COX7B	2	1	0.0157339832310093
1625	YEATS2	2	1	0.0157229452600137
1626	PCBP4	3	4	0.015722371758307
1627	ROCK1	1	3	0.0157154236353817
1628	EXTL2	2	1	0.0157137100252729
1629	TJAP1	3	4	0.0157104529931745
1630	NCAPG	3	4	0.0157102450829866
1631	ENSMMUG00000055376	3	4	0.0157088764224354
1632	MYL6	3	4	0.0157075454026314
1633	ENSMMUG00000056838	2	1	0.0157066743250444
1634	RIPOR1	2	1	0.0157004897898296
1635	KCTD3	3	4	0.0156969957532435
1636	CNOT1	2	1	0.0156933410512876
1637	ENSMMUG00000019238	1	3	0.0156928123728711
1638	RLIM	1	3	0.0156924312493904
1639	LARP1	3	4	0.0156893596103391
1640	WNK1	2	1	0.0156879591680791
1641	ARF5	2	1	0.0156781161313947
1642	JAM2	2	1	0.0156766918929571
1643	SKA2	2	1	0.0156730959769586
1644	STMN1	3	4	0.0156723161981217
1645	PPP1CC	2	1	0.0156674031877413
1646	KCTD20	3	4	0.015665415723443
1647	CHD3	2	1	0.0156624951084692
1648	GAPDH	3	4	0.0156621796985969
1649	TOP2A	3	4	0.0156583432043053
1650	ATP5MC3	3	4	0.0156569590262364
1651	C14H11orf58	2	1	0.015654919960006
1652	RPS5	1	3	0.0156510431585971
1653	ACAD11	2	1	0.0156501977240562
1654	ENSMMUG00000000478	2	1	0.0156501815334032
1655	DBNL	2	1	0.0156486191970473
1656	FABP5	3	4	0.0156471823131826
1657	HNRNPUL1	3	4	0.0156338344913028
1658	PAN2	1	3	0.0156266842931162
1659	FNTB	3	4	0.015626258464485
1660	ADAL	3	4	0.0156257734374
1661	POLDIP3	3	4	0.015622452003125
1662	ADGRL1	1	3	0.0156203453467125
1663	CTDSPL2	3	4	0.0156187970756761
1664	MON1B	2	1	0.0156167443842689
1665	PHTF2	3	4	0.0156155774749473
1666	RNF187	3	4	0.0156119332998892
1667	SUZ12	2	1	0.0156109589701022
1668	RAB11B	2	1	0.0156099740046192
1669	GNAI2	2	1	0.0156042265203991
1670	CCT7	3	4	0.0155920732458074
1671	NDRG3	2	1	0.0155873545180176
1672	EIF4E	2	1	0.0155824819744788
1673	ADGRG1	3	4	0.0155824722146075
1674	ZPR1	1	3	0.015577010566916
1675	RNF167	1	3	0.0155744871199668
1676	PDCD2	3	4	0.0155725492195023
1677	RALY	3	4	0.015572509042903
1678	EDF1	2	1	0.0155693412623583
1679	DIAPH1	3	4	0.0155619489189105
1680	ENSMMUG00000062350	1	3	0.0155610826989407
1681	FAM171A1	2	1	0.0155603905987252
1682	H2AFY2	2	1	0.0155581355753107
1683	BRPF3	2	1	0.0155580619037952
1684	EBAG9	2	1	0.0155561423810766
1685	COMMD5	2	1	0.0155544878103906
1686	UBTF	3	4	0.0155531162026794
1687	HNRNPR	1	3	0.0155498886150079
1688	PHYH	2	1	0.0155461078293906
1689	MARK2	1	3	0.0155447804815603
1690	SLC39A1	2	1	0.0155446939852151
1691	ENSMMUG00000007536	2	1	0.0155441039249181
1692	CD200	2	1	0.0155420602084479
1693	TMPO	1	3	0.0155413505456998
1694	MTRF1L	3	4	0.0155383877180735
1695	ENSMMUG00000002075	2	1	0.0155382432545747
1696	GNAI1	2	1	0.015536600622775
1697	MTMR4	2	1	0.0155355775402887
1698	GHITM	3	4	0.0155346477873899
1699	YWHAZ	2	1	0.0155318702369433
1700	RAB18	2	1	0.0155241674092394
1701	BUB3	3	4	0.0155227866743544
1702	RNF181	2	1	0.0155218337333336
1703	SOD2	2	1	0.0155136913505939
1704	APC	2	1	0.015512865436228
1705	RHOA	3	4	0.0155083698477849
1706	ZNHIT3	3	4	0.0155064633240002
1707	CELF1	2	1	0.0155028798343238
1708	CHMP5	2	1	0.0154974174224907
1709	PIGT	2	1	0.0154973111714193
1710	RALA	3	4	0.0154937244195513
1711	IFT88	2	1	0.0154909250603385
1712	B4GALT3	2	1	0.0154898320310857
1713	RWDD1	3	4	0.0154885985319563
1714	NXPH4	2	1	0.015480683918619
1715	WDFY2	1	3	0.0154805460771644
1716	PRRC2C	3	4	0.0154783134249146
1717	ELOVL5	3	4	0.0154759249639183
1718	AZI2	2	1	0.0154755923275863
1719	RDX	3	4	0.0154751008820091
1720	NUCKS1	1	3	0.0154746339872472
1721	GRK6	1	3	0.0154726621963172
1722	ENSMMUG00000055810	3	4	0.0154712579707282
1723	KPNB1	3	4	0.0154696748375483
1724	ZNF195	2	1	0.0154683338423128
1725	ENSMMUG00000058499	3	4	0.0154675419349069
1726	PINK1	3	4	0.015466189906173
1727	STOM	2	1	0.0154660864417176
1728	RAB3GAP1	3	4	0.015462445512401
1729	AP3S1	2	1	0.0154596232492514
1730	DHX29	2	1	0.0154593303452535
1731	MMGT1	2	1	0.0154579202316767
1732	VEZT	3	4	0.0154576917200854
1733	PBK	2	1	0.0154555147361632
1734	SPATS2	2	1	0.0154529212999089
1735	GGNBP2	2	1	0.0154523847653151
1736	ENSMMUG00000015217	2	1	0.0154477721276513
1737	GMFB	2	1	0.0154397089439967
1738	EIF3G	3	4	0.015435931592338
1739	ZFAND3	3	4	0.0154354084603977
1740	SPIN1	2	1	0.0154350100072361
1741	PIH1D1	2	1	0.0154339331415158
1742	MARF1	2	1	0.01543209274668
1743	RNF168	2	1	0.0154303768442536
1744	RTN2	2	1	0.0154285436589236
1745	STMN3	3	4	0.0154247596842208
1746	FOS	1	3	0.0154244066569074
1747	NSD3	3	4	0.015420900104373
1748	OAT	2	1	0.0154192229962151
1749	RNF145	2	1	0.0154168657426881
1750	PSMD13	1	3	0.0154145360985793
1751	CFDP1	3	4	0.0154144782228045
1752	ESD	2	1	0.0154104329645522
1753	PPP3CA	1	3	0.015407294199368
1754	EIF5B	3	4	0.0154053933453466
1755	FYN	1	3	0.0154023093399488
1756	EEF1A1	3	4	0.0154005636825131
1757	SRSF7	1	3	0.0154004100711767
1758	RHBDD2	2	1	0.0153986056735537
1759	DOCK11	3	4	0.015397501167112
1760	ZNF22	3	4	0.0153962763574875
1761	TTC5	3	4	0.0153957224758271
1762	ATP6V1G1	2	1	0.0153892555783262
1763	CORO1C	2	1	0.0153799404589774
1764	H2AFY2	3	4	0.0153773629571996
1765	CAPRIN1	2	1	0.0153749868527261
1766	NSA2	2	1	0.0153701629190411
1767	PIN4	2	1	0.0153698351432404
1768	RBM23	3	4	0.0153687358120593
1769	PPM1G	2	1	0.0153674844651255
1770	SOX4	2	1	0.0153632160794757
1771	RNF11	2	1	0.0153606217365395
1772	ENSMMUG00000065104	2	1	0.0153573498512181
1773	KLF6	3	4	0.0153559882405759
1774	ENSMMUG00000044585	2	1	0.015353097841325
1775	DIP2B	3	4	0.015352856873042
1776	CASP3	2	1	0.0153507077071871
1777	PTP4A1	1	3	0.0153496477266608
1778	HPCAL1	2	1	0.0153470708903472
1779	STT3B	2	1	0.0153447727658436
1780	ENSMMUG00000000752	1	3	0.015344474828018
1781	SLC25A43	2	1	0.0153420743445982
1782	BTBD7	1	3	0.0153407170434233
1783	TAF15	3	4	0.015339747276007
1784	SPG7	2	1	0.0153345470678406
1785	ZC3H7A	3	4	0.0153343138552918
1786	GGA3	2	1	0.0153299533011781
1787	PSAP	3	4	0.0153227307074253
1788	RNF220	2	1	0.0153206982069992
1789	ENSMMUG00000061128	3	4	0.0153204498927872
1790	AMD1	2	1	0.0153196445987565
1791	TMEM184C	2	1	0.0153126388682852
1792	CAND1	3	4	0.0153125937804843
1793	NUFIP2	2	1	0.0153114415201176
1794	CYFIP2	3	4	0.0153027505074721
1795	CDKAL1	2	1	0.0152989437593292
1796	APBB1	3	4	0.015298808834628
1797	HMG20B	2	1	0.015297131954497
1798	ENSMMUG00000006206	3	4	0.0152937645557889
1799	SETD5	2	1	0.015286759607077
1800	CPE	2	1	0.0152865617427768
1801	MMD	3	4	0.0152838931204056
1802	AMDHD1	1	3	0.0152797943872502
1803	ATP5MG	3	4	0.0152758795384442
1804	RDH5	2	1	0.0152740976784009
1805	EOMES	2	1	0.015273991277847
1806	CYB5R3	2	1	0.0152714360766926
1807	YY1	2	1	0.0152694702106345
1808	ACTR1A	3	4	0.0152666048322717
1809	FNBP1L	1	3	0.0152644228432979
1810	HNRNPU	3	4	0.0152634920934214
1811	MAZ	3	4	0.0152567826369444
1812	BTG1	2	1	0.0152564909918553
1813	SLC39A7	3	4	0.0152560499569001
1814	THOC2	2	1	0.0152552601657313
1815	DDX24	2	1	0.0152550112126302
1816	IVD	2	1	0.0152528575012057
1817	PSMF1	2	1	0.0152499034200593
1818	SEC11C	3	4	0.0152490201158828
1819	MSH6	1	3	0.0152454616734867
1820	ABHD2	2	1	0.0152442964836505
1821	MIS18A	3	4	0.0152441512161442
1822	ZNF623	2	1	0.0152383294907441
1823	SDCBP	3	4	0.0152374076665178
1824	JAKMIP2	3	4	0.0152366281240368
1825	CDC42SE1	1	3	0.0152365844667563
1826	CTNNB1	1	3	0.0152365377901857
1827	LRRC27	1	3	0.015236375332362
1828	ENSMMUG00000015095	1	3	0.0152270460172736
1829	ROBO1	2	1	0.0152141709729062
1830	HERPUD2	3	4	0.0152108794981532
1831	HACD3	2	1	0.0152079561394202
1832	TMEM199	2	1	0.0152078737981903
1833	METTL9	2	1	0.0152078476957315
1834	RANGAP1	3	4	0.0152074328976491
1835	IK	3	4	0.0152073078813772
1836	CD2BP2	2	1	0.0152044138310157
1837	SEM1	2	1	0.0152040747802791
1838	NIPBL	3	4	0.0152022123985918
1839	MGST3	2	1	0.0151901758858704
1840	PIMREG	2	1	0.0151898361759817
1841	TRIM37	3	4	0.0151882662273016
1842	PPP2R5E	1	3	0.0151859841779703
1843	SUB1	2	1	0.0151831052479172
1844	GSTP1	3	4	0.015182714339822
1845	CCT6A	3	4	0.0151812252585128
1846	ECHDC1	3	4	0.0151805330765965
1847	ARHGDIA	1	3	0.0151756092771653
1848	SPTAN1	2	1	0.0151660635296362
1849	SMN1	3	4	0.0151638682910918
1850	DPYSL5	1	3	0.0151637911332188
1851	MSN	2	1	0.0151628796088608
1852	POLR2B	3	4	0.0151606459455566
1853	ABI1	2	1	0.0151562615102575
1854	TM9SF2	2	1	0.0151560856632032
1855	USP11	3	4	0.0151500484194021
1856	PSMB7	2	1	0.015149928551058
1857	UBE2D1	3	4	0.0151490527802221
1858	SUN2	2	1	0.0151483338245536
1859	CHMP5	3	4	0.0151413886173454
1860	DBN1	3	4	0.0151409198099606
1861	HECTD1	1	3	0.0151393244550494
1862	GPRC5B	3	4	0.0151378454420127
1863	PHIP	3	4	0.0151339717094134
1864	PPP4R1	3	4	0.0151311053145624
1865	DCTN4	2	1	0.015129572479066
1866	ENSMMUG00000056012	2	1	0.0151286196399606
1867	GTF2A2	2	1	0.0151265377646929
1868	RBFOX3	3	4	0.0151241165372273
1869	RHOBTB3	3	4	0.0151172431414865
1870	SCAF4	3	4	0.01511572605451
1871	ENSMMUG00000006778	2	1	0.015114856136824
1872	C16H17orf80	1	3	0.0151111458412333
1873	UPF3B	1	3	0.015111022975187
1874	DPP3	2	1	0.0151081211811422
1875	MCM6	2	1	0.0151074851160333
1876	BEND5	3	4	0.0151048254295565
1877	KIAA0408	3	4	0.0151046566716771
1878	TMSB10	3	4	0.01510354067987
1879	ELAVL2	1	3	0.0151014484306224
1880	PTBP1	3	4	0.0150965462798943
1881	MRPS9	3	4	0.0150929038389223
1882	ENSMMUG00000018557	3	4	0.0150890121396874
1883	CCDC82	3	4	0.0150836566417537
1884	ARID1A	2	1	0.0150831233309649
1885	ADD1	3	4	0.0150822599104476
1886	HSPB1	3	4	0.0150816920357782
1887	PSMC3	2	1	0.0150784097727493
1888	PRPF4B	1	3	0.015074660110631
1889	NPTN	3	4	0.0150723417685347
1890	SCARF2	2	1	0.0150711725665335
1891	ZNF608	2	1	0.0150698199586055
1892	DNAJB1	2	1	0.0150695351989043
1893	ERCC6L	3	4	0.0150661297112413
1894	CENPT	2	1	0.0150649953793818
1895	MTA1	3	4	0.0150624042449543
1896	CCNY	3	4	0.0150591083925795
1897	NUCKS1	3	4	0.0150589824186797
1898	AAMP	3	4	0.0150586903926882
1899	DERPC	3	4	0.0150550959947452
1900	TOMM70	2	1	0.0150542887168559
1901	RER1	2	1	0.0150528474735025
1902	ENSMMUG00000065246	2	1	0.0150472076355447
1903	ADGRG1	2	1	0.0150450390557474
1904	NAE1	2	1	0.0150449507161004
1905	TBC1D7	2	1	0.0150381807136199
1906	COX7A2	3	4	0.0150376908483388
1907	TMEM231	1	3	0.015032587318628
1908	MARCHF7	3	4	0.0150305090499477
1909	DDX42	3	4	0.0150239105260788
1910	TRA2B	2	1	0.0150218355240154
1911	CETN2	3	4	0.0150211533494894
1912	RPL27A	1	3	0.0150164828880535
1913	CBX3	2	1	0.0150122837221997
1914	RNF167	3	4	0.0150110153268868
1915	ZNF181	3	4	0.0150085961791926
1916	SPG7	3	4	0.0150081826820707
1917	NAP1L3	2	1	0.0150064062041003
1918	SNRPB2	3	4	0.015005256354353
1919	DCTN6	2	1	0.0150036521387229
1920	KIF26A	1	3	0.0150028715343811
1921	C15H9orf152	2	1	0.0150018401915143
1922	PIKFYVE	3	4	0.0149998730086644
1923	OBI1	1	3	0.0149991916258809
1924	TMED2	2	1	0.0149888218815881
1925	CNR1	2	1	0.0149841102477151
1926	SRP14	2	1	0.0149804295708198
1927	LRRC47	2	1	0.0149795627433948
1928	FABP7	3	4	0.0149765166111699
1929	NT5C2	2	1	0.0149746770813872
1930	SNRNP200	2	1	0.0149740756189404
1931	URI1	2	1	0.0149694743001075
1932	PSMC1	3	4	0.0149626829340652
1933	CPLX2	3	4	0.0149609332199256
1934	EPRS1	3	4	0.0149592463409756
1935	DNAAF2	2	1	0.0149587448122095
1936	MRPS31	2	1	0.0149569395229524
1937	CBLB	3	4	0.0149568559893675
1938	ENSMMUG00000049722	2	1	0.0149560153019988
1939	PSMA4	2	1	0.014952280383277
1940	CLMP	1	3	0.0149482469355397
1941	AP2A2	2	1	0.0149410087655291
1942	ENSMMUG00000052536	1	3	0.0149405444373648
1943	MAP3K3	3	4	0.0149402463256026
1944	CTBP1	3	4	0.0149400250644583
1945	CD59	2	1	0.0149397430293073
1946	VGLL4	2	1	0.0149393493446009
1947	ANKRD10	3	4	0.0149357665872419
1948	STUB1	3	4	0.0149351569597756
1949	KLHL15	2	1	0.0149351486004765
1950	FTH1	1	3	0.0149292594447193
1951	SPRY2	2	1	0.0149187172826633
1952	RPL35A	2	1	0.0149149998402809
1953	PCBD1	2	1	0.0149132207911663
1954	IPO9	3	4	0.0149080679582684
1955	AP2B1	2	1	0.0149028146104297
1956	PIMREG	1	3	0.0148961988050298
1957	YEATS2	3	4	0.0148917335463789
1958	ENSMMUG00000053146	3	4	0.0148892589998555
1959	KAT14	3	4	0.0148874575163059
1960	RNF41	2	1	0.0148868048656003
1961	GNAI3	2	1	0.0148857478654985
1962	GNG3	3	4	0.0148798300939114
1963	EIF5	3	4	0.0148797900179903
1964	SRP9	3	4	0.0148788415849566
1965	NUP93	2	1	0.0148786530388897
1966	ENSMMUG00000017400	2	1	0.0148775349438238
1967	RBFA	3	4	0.014876532995652
1968	THRA	2	1	0.0148764439334244
1969	RNF38	3	4	0.014875946534284
1970	PRR11	1	3	0.0148732752272519
1971	MGST1	2	1	0.0148704089187743
1972	CUL3	3	4	0.0148659810691404
1973	ENSMMUG00000063288	2	1	0.0148650578159726
1974	RBIS	3	4	0.0148615563276015
1975	ENSMMUG00000030408	1	3	0.0148605191013807
1976	SLIRP	3	4	0.014858370868496
1977	ENSMMUG00000064760	2	1	0.0148573207705081
1978	M6PR	3	4	0.0148518200453112
1979	CSRNP3	1	3	0.014850744773168
1980	RANBP1	2	1	0.0148504050792587
1981	FLNA	2	1	0.0148497564098833
1982	RASSF2	3	4	0.0148468883619792
1983	SREBF1	2	1	0.0148463999635792
1984	RAB30	1	3	0.0148461696753058
1985	ENSMMUG00000018491	2	1	0.014844321501083
1986	GMPS	3	4	0.0148420313248697
1987	STRBP	2	1	0.0148393715590858
1988	FDFT1	3	4	0.0148383377787051
1989	EIF2AK2	2	1	0.0148352582524877
1990	C1H1orf21	2	1	0.0148342088871288
1991	ENSMMUG00000003234	2	1	0.0148283277904308
1992	SAR1A	2	1	0.0148279128206522
1993	UBAP2L	2	1	0.0148272523858511
1994	MCL1	3	4	0.0148261064753069
1995	RAB4A	2	1	0.0148246228450849
1996	AKT3	1	3	0.0148219607447198
1997	EIF3A	2	1	0.0148208996098528
1998	CEP170	2	1	0.0148205985698906
1999	BCLAF1	1	3	0.0148163940308017
[truncated: 71,000 more rows]
