# Supplementary material for: Temporal transcriptomic dynamics in developing macaque neocortex
Source: eLife. 2024 Feb 28;12:RP90325. doi: 10.7554/eLife.90325 (PMC10911584; doi:10.7554/eLife.90325)
Supplement: Supplementary file 5. [file elife-90325-supp5.csv]

	feature_id	from	to	importance
1	CCNI	2	1	0.0429681128374423
2	TUBB	2	1	0.0382779306383773
3	ENSMMUG00000012140	1	3	0.0358409224652218
4	ENSMMUG00000038373	2	1	0.0356867660706903
5	RPL9	2	1	0.03496860856287
6	ENSMMUG00000005593	2	1	0.0341785564192669
7	ENSMMUG00000010266	1	4	0.0341741269527
8	EID1	1	4	0.0340807861892109
9	SEPTIN11	2	1	0.033660310125426
10	ENSMMUG00000060287	1	3	0.0329767504150744
11	TPM3	1	3	0.0324476939945542
12	ENSMMUG00000049151	2	1	0.0323497642024066
13	GNAQ	1	3	0.0322280126209758
14	SMARCA5	2	1	0.0322176798580781
15	CTXN1	1	4	0.031777744209988
16	RPL22	1	3	0.0317261184393126
17	DDX17	2	1	0.0316594334301547
18	RPS23	1	4	0.0315877422892808
19	RTN3	1	3	0.0315555756502652
20	RPS9	2	1	0.0312534344256887
21	CSNK1A1	1	3	0.0310903274958257
22	RTN3	1	4	0.0310673655561303
23	YWHAB	2	1	0.031032620418865
24	TMEM108	2	1	0.0306328872630404
25	SMC3	1	4	0.0305470551084215
26	ATP6	1	4	0.0304622865022796
27	ATP6	1	3	0.0302218209261793
28	CLTC	1	3	0.0302049210991153
29	OS9	1	3	0.0301351627142629
30	RPL23	2	1	0.030096189240745
31	SYT11	1	3	0.0300121095971506
32	RPS3	1	3	0.02993827255315
33	COX2	1	3	0.0297778569628521
34	ERBB3	2	1	0.0295910986307253
35	SSR1	2	1	0.0295564673331375
36	SKP1	2	1	0.0294085625667953
37	RPL8	2	1	0.0293472625997348
38	CCSER2	2	1	0.0291479462170379
39	DSTN	1	3	0.0290152284267794
40	MRTO4	2	1	0.0289347641013561
41	C1QBP	1	4	0.0288673445291318
42	SLC2A1	1	3	0.0286475508122556
43	METTL21A	1	4	0.0285252355947476
44	TGOLN2	2	1	0.0284370541276592
45	ENSMMUG00000061125	1	4	0.0283599311065626
46	SMAD5	2	1	0.0283237499004758
47	ND2	1	4	0.0283232368126628
48	SALL2	1	3	0.028126330201883
49	ATP5MC2	2	1	0.0278679655966618
50	LENG8	1	4	0.0278453216108859
51	SRRM2	1	3	0.0278211846386457
52	ACTB	2	1	0.0276521651219286
53	ARGLU1	1	4	0.0275894864779451
54	SRSF4	1	3	0.0275761338685721
55	CAMK2N1	1	3	0.0274222503980796
56	PRRC2C	2	1	0.027401617463416
57	RPL37A	1	3	0.0273743215373736
58	GPT2	2	1	0.0272640032008276
59	FOS	1	4	0.0272436886199093
60	ZNF664	1	3	0.0271713549390263
61	NR2F1	2	1	0.0271632255782923
62	KIAA0232	1	3	0.0271295113368635
63	ENSMMUG00000019174	1	3	0.0270380265084613
64	HDGF	2	1	0.0270240221903962
65	CALU	1	3	0.027019212847335
66	EEF1B2	2	1	0.0269323423117829
67	CLNS1A	1	3	0.0268668397899897
68	P4HB	1	3	0.0267497750518719
69	NUDT4	2	1	0.026749379560737
70	TUBB2B	2	1	0.0267362812781856
71	NT5DC2	2	1	0.0266669221906061
72	TIGAR	1	4	0.0266178001968574
73	UBE2D3	2	1	0.0265974678121902
74	RSF1	1	3	0.0265780094381284
75	COX2	2	1	0.0265348946914652
76	PLEKHB2	1	3	0.0265325701669171
77	PAIP1	1	3	0.0264376670017758
78	ENSMMUG00000001858	1	3	0.0264331334748009
79	ENSMMUG00000060590	1	3	0.0264182242797608
80	STMN1	2	1	0.0263937802280727
81	ITM2B	1	4	0.0262797110925903
82	HTRA1	1	3	0.0262561420707511
83	ENSMMUG00000028699	1	4	0.0262372580694858
84	HMGCS1	1	4	0.026147165857569
85	ND2	1	3	0.0261459111404413
86	HNRNPUL1	1	3	0.0261210930308602
87	IGFBP2	1	4	0.0261066811865417
88	RNF145	1	3	0.026101833046642
89	TRIL	2	1	0.0260835445714883
90	TARDBP	2	1	0.0260344425500885
91	ADD1	1	4	0.0259769756225144
92	ACTG1	2	1	0.0259514208931856
93	TOMM20	2	1	0.0259129217981376
94	TMBIM6	1	3	0.0258347660342695
95	HNRNPU	2	1	0.0257360914578964
96	CFDP1	1	3	0.0257121681879273
97	MARCKSL1	2	1	0.025675488347823
98	APC2	2	1	0.0256702067499087
99	RPS8	1	3	0.0256455363049908
100	H2AFZ	1	4	0.0256412355635149
101	ENY2	2	1	0.0255961048578004
102	COX3	1	3	0.0255911830820273
103	ENSMMUG00000014256	1	4	0.0255816847849462
104	RAB5B	1	4	0.0254733148827306
105	ENSMMUG00000061824	1	4	0.0254107838582834
106	COX1	2	1	0.0253381990301351
107	ENSMMUG00000022075	2	1	0.025298074511898
108	ENSMMUG00000060287	2	1	0.0252569202083402
109	BCLAF1	2	1	0.0252413127803302
110	BRD7	2	1	0.0252122942118756
111	VIM	1	3	0.0252098912543564
112	ENSMMUG00000052424	1	3	0.025206492025842
113	CBR1	1	3	0.0251826197894947
114	STMN2	1	3	0.0251809196044881
115	ENSMMUG00000015563	2	1	0.0251223350305731
116	SOD1	1	4	0.0250924796629824
117	AZIN1	1	4	0.0250512940191171
118	MCAM	2	1	0.0250342652185125
119	ENSMMUG00000039070	1	3	0.0250316895357349
120	NDUFA4	1	3	0.0250245669285387
121	NIPBL	2	1	0.0249999723877372
122	HNRNPU	1	3	0.0249972537738373
123	PTPRZ1	1	3	0.0249667150417242
124	POGK	1	3	0.0249557990373514
125	ATP1B2	1	3	0.0249355555081102
126	ENSMMUG00000013429	2	1	0.0249292731510857
127	RAB10	1	3	0.0249034721037899
128	ND4	1	3	0.0248992978134306
129	ENSMMUG00000052127	2	1	0.0248713792762305
130	MEST	1	4	0.0248700413947109
131	POGK	2	1	0.024842275630247
132	UNC50	2	1	0.0248361651696125
133	CAND1	2	1	0.0248245775224106
134	PRPF4B	2	1	0.0247416386236223
135	ACTG1	1	4	0.024734361625455
136	RPS28	1	3	0.0247330141234807
137	HNRNPF	1	4	0.0246973752516936
138	UBB	2	1	0.0246945981885068
139	SON	2	1	0.0246737459204937
140	ARF1	1	4	0.0246696985554296
141	PPIA	1	4	0.0246640218776541
142	RPS20	1	4	0.0246224079833549
143	NCL	1	4	0.0246090166752955
144	LRRC4B	1	3	0.0245987390198332
145	TMEM184C	2	1	0.0245783480353803
146	RPL5	1	3	0.02455588415901
147	RPL38	1	4	0.0245117757265784
148	ITM2C	2	1	0.0244942938950505
149	ENSMMUG00000020073	1	3	0.0244895366379069
150	PDLIM5	1	3	0.0244601977344141
151	ENSMMUG00000015563	1	3	0.0244388826843068
152	CHCHD1	1	4	0.0244039011500129
153	TMEM258	1	3	0.0243949778210606
154	FXYD6	2	1	0.0243483856984994
155	BCL2L2.PABPN1	1	3	0.0243422034459371
156	RPN2	1	4	0.0243390002574028
157	OCIAD1	2	1	0.0243379939698035
158	ATP5F1E	2	1	0.0242816781574655
159	ENSMMUG00000055584	1	3	0.0242774676990461
160	PNRC2	2	1	0.0242672957981979
161	GNAI2	1	4	0.0242606614773685
162	ACAP2	2	1	0.0242383735319474
163	ENSMMUG00000000671	1	4	0.0242381129960478
164	MLF2	1	3	0.0242240237404189
165	RPS17	1	3	0.0241943625252311
166	KMT2E	2	1	0.0241518977357349
167	TMX1	2	1	0.0240884988835522
168	MORF4L1	2	1	0.0240827323424533
169	H2AZ2	2	1	0.0240820175182919
170	RAB11B	2	1	0.0240481857826429
171	RPSA	1	3	0.0240310332028109
172	RPL13A	2	1	0.0240116628891569
173	ENSMMUG00000040181	1	4	0.023966722495646
174	C4H6orf136	2	1	0.0239308111077821
175	COX5B	1	3	0.0239267426707896
176	TCEAL4	2	1	0.0239082648869577
177	GPM6A	1	3	0.0239050778889341
178	WASL	1	3	0.023903041177352
179	KIDINS220	1	3	0.023889969508684
180	FUBP1	1	4	0.0238694020385712
181	CLCN3	1	3	0.0238692425661234
182	RPS23	2	1	0.0238673521922069
183	RAB1A	1	4	0.0238310632873519
184	PWWP2A	1	4	0.0238148739735703
185	TM9SF2	1	4	0.0237957382092541
186	RACK1	2	1	0.0237696020262226
187	RAB14	1	3	0.0237634066971163
188	SNRPD3	2	1	0.0237604572106165
189	HNRNPA2B1	1	4	0.0237588097030033
190	CKAP4	1	3	0.0237501454216048
191	NRBP1	2	1	0.0237490359832498
192	MYO6	2	1	0.0237463809376634
193	TSPAN7	1	3	0.0237423431389338
194	ZEB1	2	1	0.0237213686734549
195	RPS14	2	1	0.0237063134439842
196	FAM127C	2	1	0.0237026276838301
197	RPL24	1	4	0.0236516393545367
198	RPS6	2	1	0.0236428675311311
199	EIF3K	1	4	0.0236138911775374
200	ENSMMUG00000065362	2	1	0.0236131018155469
201	PPP4R3B	1	3	0.0235593451190175
202	GTF2I	1	3	0.0235568767584816
203	IGFBP2	1	3	0.0235520857519029
204	GLIPR2	2	1	0.0235499778998702
205	ANAPC13	1	4	0.023548287409461
206	ZNF24	1	4	0.023544718975695
207	NGRN	1	4	0.0235395706819338
208	PNISR	1	4	0.02352598354218
209	ARPC3	1	3	0.0235220141779628
210	SLC35F1	1	4	0.023514591806523
211	ZRANB2	1	3	0.0235078850439187
212	NCL	2	1	0.0234675035816268
213	SARAF	1	3	0.0234280585111283
214	SUPT16H	2	1	0.0234150055131509
215	FOS	2	1	0.0234000595063343
216	DLST	1	3	0.0233953923256693
217	EWSR1	2	1	0.023367401145365
218	RPS26	2	1	0.0233608132315972
219	DBN1	2	1	0.0233433784990575
220	ATP6	2	1	0.0233388915017979
221	ALDH7A1	1	3	0.0233338407334486
222	ENSMMUG00000006965	2	1	0.0233332378662872
223	ABCF1	1	4	0.0232786906441007
224	RPS8	2	1	0.0232503984265717
225	COX8A	1	3	0.0232478757463217
226	RRAGA	2	1	0.0232344885044432
227	LUC7L3	1	3	0.0231573851673179
228	CNTFR	1	3	0.0231459744758334
229	UQCRC1	1	4	0.0231452803536239
230	TMCO3	1	4	0.0231247002767623
231	HNRNPA0	2	1	0.023105042068503
232	ENSMMUG00000020073	2	1	0.0230835417618057
233	HSP90AA1	1	3	0.0230761081574381
234	PIK3R1	1	4	0.0230445163132659
235	TUBB3	2	1	0.0230319836299091
236	EEF2	1	4	0.0230292264108452
237	SMARCA5	1	4	0.0230280247724494
238	TUBB2B	1	4	0.0230173618265093
239	NISCH	2	1	0.023007936717673
240	IGFBP5	2	1	0.023007599322658
241	THRAP3	1	4	0.0230001097128575
242	RPS3A	1	3	0.0229485379300351
243	YWHAH	1	3	0.0229351821128796
244	SYF2	1	4	0.0229173465146621
245	GNG2	1	3	0.0229127083752279
246	EIF4G2	1	3	0.0229056904390153
247	PCBP1	2	1	0.0228963027480299
248	EIF2S2	2	1	0.0228762049264174
249	NBR1	2	1	0.0228716955353166
250	DDX1	2	1	0.0228513539461423
251	C6H5orf24	1	3	0.0228417405777945
252	SNU13	2	1	0.0228188559680327
253	FAM120A	2	1	0.0227994545190679
254	NRAS	2	1	0.0227957912566201
255	GABBR1	1	3	0.0227693666795094
256	ELAVL3	2	1	0.0227456156312997
257	ZNF350	2	1	0.0227310720147263
258	HMGB1	1	3	0.0227294282339479
259	TRIM25	2	1	0.0226976255575444
260	SCRN1	2	1	0.0226789835216358
261	KIFBP	1	4	0.0226398170646878
262	SF3B4	2	1	0.0226385530133264
263	TMCO3	1	3	0.0226361623149008
264	MTF2	2	1	0.0226255048956057
265	MTSS2	2	1	0.0226016294691572
266	TIGAR	2	1	0.0225866618137988
267	TM7SF2	2	1	0.0225671007634491
268	DDX5	2	1	0.0225582020892161
269	SON	1	4	0.0225451527789485
270	DDOST	1	4	0.0225294217994545
271	DTD1	2	1	0.0225293393991491
272	SNRNP70	2	1	0.0225216720596436
273	HNRNPH2	2	1	0.0225123274817176
274	COMT	2	1	0.0225111921447419
275	UBR4	1	4	0.0225109568299079
276	CCT7	1	3	0.022508745508232
277	TOP2B	1	3	0.022502394761757
278	TMEM50A	2	1	0.0224949831965494
279	ENSMMUG00000060590	2	1	0.022494147988079
280	PLEKHM3	1	3	0.0224545181915252
281	GNG5	2	1	0.0224357506234575
282	PPP1R12A	1	4	0.0224342779671121
283	VAPA	1	3	0.0224110764861402
284	ENSMMUG00000056860	1	4	0.0224000482975802
285	TOMM20	1	3	0.0223491078117835
286	TMEM106B	1	3	0.0223286508446385
287	YWHAB	1	3	0.02231929815047
288	HNRNPR	1	3	0.0223118807785845
289	NDUFS4	1	3	0.0223106481928064
290	ZRANB2	2	1	0.0222974687037747
291	ACAD10	2	1	0.0222871873518889
292	ENSMMUG00000010266	1	3	0.0222688633686233
293	ENSMMUG00000065373	2	1	0.0222487285747879
294	MAX	1	3	0.0222420308703234
295	ATP5MC1	1	3	0.0222274247703912
296	RPL32	1	3	0.0222131886795443
297	JAM3	2	1	0.0221879875241836
298	ENSMMUG00000006803	1	4	0.0221717471778363
299	NKTR	2	1	0.0221712323678985
300	SCAF8	2	1	0.0221419314292317
301	FAU	1	3	0.0221299876206451
302	RPL38	1	3	0.022128967345691
303	SKP1	1	4	0.0221109156075939
304	DYNC1LI2	2	1	0.0221059045024779
305	ACTB	1	3	0.0220806128249227
306	MEIS2	1	3	0.0220691352747002
307	RPL6	1	4	0.0220566507590825
308	CCND1	2	1	0.0220553307243907
309	TRIM72	2	1	0.0220423581838212
310	PDAP1	1	3	0.022037474496898
311	AMDHD1	1	4	0.0219949081361702
312	H2AZ2	1	3	0.021984509991456
313	ERH	1	3	0.0219788392564246
314	RHOBTB3	1	3	0.0219627327312686
315	RNF13	1	4	0.0219438223792262
316	NSF	1	3	0.0219319823161279
317	ATP6V0E1	2	1	0.0219302407380662
318	HSP90B1	1	3	0.021926840296676
319	GANAB	2	1	0.021900357830618
320	HSP90AA1	2	1	0.0218967291499243
321	CYB5B	2	1	0.0218858887645235
322	UBE2D3	1	4	0.0218816781911924
323	JPT1	2	1	0.0218750922275165
324	SLC35E2	1	3	0.0218735390469765
325	KPNA3	2	1	0.0218663167234841
326	SRSF7	2	1	0.0218570264578196
327	LAPTM4A	2	1	0.0218567878953507
328	GPATCH4	1	4	0.0218345643518447
329	MCRS1	1	3	0.0218281828091776
330	BCCIP	2	1	0.0217832136986758
331	DPYSL2	1	4	0.0217480972283848
332	WNK1	2	1	0.0217444453315898
333	DBI	1	4	0.0217437184005243
334	EEF1G	2	1	0.0217272436591128
335	PRPF31	1	3	0.0217172988407833
336	ERI1	2	1	0.0216766099078688
337	RPL19	2	1	0.0216605566817886
338	SMCR8	1	4	0.0216402164490144
339	ADGRB3	2	1	0.0216083740156642
340	GPM6B	2	1	0.0216047064072651
341	PAIP2	1	3	0.0216008216230339
342	NAP1L1	1	4	0.021588209580547
343	ARL2BP	2	1	0.0215746883878205
344	RAD21	2	1	0.0215695397708826
345	IDH1	1	3	0.0215667920878044
346	GPR107	1	4	0.0215598706784764
347	TIMM23	1	4	0.0215386332307167
348	PCDHGB5	2	1	0.0215373203413415
349	OLIG2	2	1	0.0215371793584434
350	TMEM14B	1	4	0.0215320982252622
351	HSPA8	1	4	0.0215271880010662
352	H1.0	1	3	0.0215266516253855
353	KCTD20	2	1	0.0214978815414853
354	CHD7	2	1	0.0214930193465354
355	Metazoa-SRP	1	3	0.0214878357301117
356	CUL4A	2	1	0.0214702757510636
357	PPIG	1	3	0.021469252975689
358	PPP4R1	1	3	0.0214681759432181
359	ACAD10	1	3	0.0214436755614905
360	RPL23	1	3	0.0214165287350273
361	DNAJA1	2	1	0.0213734194374987
362	MAP1B	1	3	0.0213684226574252
363	RPS26	1	3	0.0213648607201036
364	ZCCHC17	2	1	0.0213442743100696
365	ENSMMUG00000028695	1	4	0.021342637745634
366	CSDE1	1	3	0.0213257425951093
367	DPYSL2	1	3	0.0213254356156072
368	GPATCH8	1	4	0.0213217389128359
369	NOL7	1	4	0.0212850987071431
370	ENSMMUG00000038373	1	3	0.0212807164244076
371	AP2A2	2	1	0.021278739433893
372	TTYH1	1	3	0.0212707824210098
373	ACTR2	2	1	0.0212695000532851
374	DDX17	1	3	0.0212641708492961
375	EIF4A2	2	1	0.021260752594927
376	ENSMMUG00000064232	1	4	0.0212308996369871
377	PPP1CB	2	1	0.0212273934340573
378	ENSMMUG00000029973	2	1	0.0212226413688536
379	HNRNPDL	1	3	0.0212217761114445
380	VPS28	1	3	0.0212036548732969
381	CDK2AP2	1	3	0.0212022615306854
382	QKI	2	1	0.0211950468311593
383	SRSF9	1	4	0.021177099276048
384	HGSNAT	1	4	0.0211755427674633
385	CFL1	1	4	0.0211647489581279
386	SNN	2	1	0.0211340903922154
387	APP	1	4	0.0211329648631068
388	KIF1B	1	3	0.0211213455245677
389	RPL13	2	1	0.0211177270676851
390	RPS24	1	3	0.0211165981360484
391	PRDX1	1	4	0.0211133433344292
392	TMEM14B	2	1	0.0211100339881872
393	TPT1	1	4	0.0211071549628965
394	PTPRZ1	1	4	0.0210917462616062
395	ZFP36L1	1	4	0.0210642783651397
396	ENSMMUG00000051392	1	4	0.0210621532470815
397	TFG	2	1	0.0210596369902467
398	CPE	2	1	0.0210443117432648
399	ING4	1	4	0.02104305007494
400	MAP1A	2	1	0.0210401712565723
401	SYNGAP1	1	3	0.0210381834764597
402	CBX3	2	1	0.0210304373530422
403	RPL10	2	1	0.0209997371405117
404	ATP5IF1	2	1	0.0209996680764415
405	QKI	1	3	0.0209903764996233
406	CTDSP2	1	3	0.0209874126729548
407	RALY	1	4	0.0209684943128726
408	UBE2N	1	3	0.0209502688583019
409	MTA2	2	1	0.0209471919528468
410	KRCC1	2	1	0.0209447514653706
411	CSNK1A1	2	1	0.0209215830423233
412	PTPRZ1	2	1	0.0209089839018588
413	RAB6B	1	3	0.020907941751478
414	TMEM59	1	3	0.0209057629763365
415	DYNC1LI2	1	3	0.0209040232808913
416	CD81	1	3	0.0209010311830584
417	PTN	2	1	0.0208897925107544
418	ATXN7L3B	1	3	0.0208876268057633
419	SRSF11	1	3	0.0208805980183374
420	RPS23	1	3	0.0208573132579901
421	LRRN1	2	1	0.0208545921420509
422	ILF2	1	3	0.0208522453348903
423	RPL23A	1	3	0.0208491313196515
424	NES	2	1	0.0208481888491692
425	KIF13A	1	3	0.0208408845592475
426	SF3B3	1	3	0.020839579701567
427	CAPZB	1	3	0.0208079923737038
428	GSTM4	1	4	0.0208024783899973
429	SEPTIN2	1	4	0.0208023856764953
430	SDHAF4	2	1	0.0207903857947102
431	LUC7L3	2	1	0.0207877539518209
432	COA6	2	1	0.0207826613476588
433	TCEA1	2	1	0.0207821172305806
434	TUBB2B	1	3	0.0207738258960316
435	MLLT11	2	1	0.0207672925392658
436	MSMO1	1	3	0.0207566901257623
437	DBN1	1	3	0.0207365138392712
438	GNB4	2	1	0.0207283836469803
439	ACTG1	1	3	0.0207254912530382
440	PARP6	1	4	0.020711451423033
441	ENSMMUG00000013429	1	3	0.0207025459597207
442	LINGO1	1	4	0.0206783101383555
443	FAM114A2	1	3	0.0206700161722027
444	CANX	2	1	0.0206679073567243
445	ENSMMUG00000051440	1	4	0.0206538606390672
446	RDX	2	1	0.0206413095401156
447	TXNL1	2	1	0.0206242580386227
448	FNBP1L	2	1	0.0206187249906937
449	APEX1	2	1	0.0206108329062082
450	C2H3orf70	1	4	0.0206086019281617
451	PNN	2	1	0.0205946034328346
452	RAP2A	1	3	0.0205903849804957
453	RNF187	1	3	0.0205879181361421
454	N4BP1	1	3	0.0205831496096065
455	GPM6A	2	1	0.0205727327976648
456	PDHB	2	1	0.0205690849516027
457	LAMP1	1	3	0.0205614202812389
458	HP1BP3	2	1	0.0205377202828673
459	EEF1A1	1	4	0.0205303573894134
460	UBE2D1	2	1	0.0205235166900096
461	RNF5	1	3	0.0205127340243029
462	CLU	1	4	0.0205060414579952
463	RHOA	2	1	0.0205053560739413
464	GRIA3	1	3	0.0204959522917493
465	ANK2	2	1	0.0204812579456737
466	PRMT2	2	1	0.0204744774769915
467	USP11	1	3	0.0204735809259215
468	SEC62	1	3	0.0204628613273062
469	AKAP11	2	1	0.020456467745238
470	IQGAP1	2	1	0.0204563122385183
471	C14H11orf58	1	3	0.0204540732008064
472	TSPAN3	1	4	0.0204522806519931
473	TOPORS	2	1	0.0204442060373035
474	SRSF2	1	4	0.0204378999182182
475	MDH1	1	4	0.0204256058248643
476	ENSMMUG00000064769	1	3	0.0204245812093373
477	STAR	1	3	0.0203949779817678
478	HDLBP	1	3	0.0203869339477617
479	SLC25A3	1	3	0.0203868650981266
480	HNRNPF	1	3	0.0203724687958254
481	GPM6B	1	4	0.0203703767993846
482	ENSMMUG00000018037	1	4	0.0203644550857033
483	ZNF22	1	3	0.0203638092312902
484	MORF4L1	1	3	0.0203603166539674
485	SATB1	1	4	0.0203524205065476
486	OTX1	2	1	0.0203237523828766
487	EIF1AX	2	1	0.0203127823084315
488	RNF41	1	4	0.0203118645411078
489	CCNH	2	1	0.0203078317754881
490	DIDO1	1	3	0.020300534434798
491	NARS1	1	4	0.020293242926197
492	PHLPP1	2	1	0.0202879443769099
493	WSB1	2	1	0.0202860005324636
494	MAPRE2	2	1	0.0202804175526493
495	ZMYM3	2	1	0.0202711097858138
496	OSTC	1	3	0.0202704510194589
497	SQLE	2	1	0.0202674723897801
498	ARHGAP21	1	4	0.0202597727139999
499	KIF3A	2	1	0.0202493346009809
500	RAB6A	2	1	0.0202465745103956
501	HS2ST1	1	4	0.0202355047657961
502	ACTR2	1	3	0.0202240556104972
503	PSAP	1	4	0.0202138326497118
504	THOC2	2	1	0.0201906890229409
505	PUM2	1	3	0.0201904681436536
506	ASTN1	2	1	0.0201873222728993
507	VAT1	1	3	0.0201832880285493
508	PSMD2	1	3	0.0201792318119504
509	TMED10	2	1	0.0201681941140917
510	BPTF	2	1	0.0201655250591044
511	UBA52	2	1	0.0201593838193445
512	KIAA0100	1	3	0.0201490009467377
513	ELOA	1	4	0.0201486794735472
514	HNRNPK	2	1	0.0201471675267419
515	GPSM2	1	3	0.0201453709165378
516	PPDPF	1	4	0.0201424401503893
517	ENSMMUG00000022075	1	3	0.0201386055958545
518	DCLK2	1	4	0.0201358991003379
519	IKBKG	2	1	0.0201237642123156
520	HSD17B12	1	3	0.020084039487971
521	ENSMMUG00000060923	1	3	0.0200839586768045
522	NONO	2	1	0.0200838805996868
523	FAM120A	1	4	0.0200801908543578
524	KCTD20	1	4	0.0200800382267135
525	GRM3	1	3	0.0200764160791805
526	GRB10	1	3	0.0200547206430415
527	BPTF	1	4	0.0200521127260322
528	GOLM1	1	4	0.0200438420573139
529	TOR1AIP2	1	3	0.0200300506932472
530	ENSMMUG00000010266	2	1	0.0200042475153547
531	TMEM131L	1	3	0.0199949187702688
532	ENSMMUG00000011798	1	3	0.019992353834595
533	NCBP2	1	3	0.0199878921923304
534	HNRNPAB	2	1	0.0199751679326896
535	XRCC6	1	3	0.019972513148895
536	ATP6V1FNB	1	3	0.0199688023497054
537	MEMO1	2	1	0.0199643881508959
538	PTN	1	4	0.0199617600065557
539	ENSMMUG00000045425	1	4	0.0199612563133593
540	ACTB	1	4	0.0199607856869083
541	EIF4A1	1	4	0.0199455063501315
542	TOMM7	1	3	0.0199405697013794
543	PON2	1	3	0.0199341124341727
544	SPEN	2	1	0.0199289488186812
545	DNER	1	4	0.0199168747877756
546	WDR48	1	4	0.0199055750619929
547	KDM5B	1	3	0.019901477359419
548	CAPZA2	1	3	0.0198866972342761
549	FEZ1	2	1	0.019883419334395
550	RPS11	1	4	0.0198680341223386
551	RPS3	2	1	0.019866015244425
552	ENSMMUG00000065175	1	4	0.0198574687836368
553	SENP6	1	3	0.0198479580914331
554	GAP43	2	1	0.0198393632970158
555	HERPUD2	1	4	0.0198383314758416
556	YY1	2	1	0.0198306540925046
557	MVB12A	2	1	0.0198267446522762
558	ENSMMUG00000041539	2	1	0.0198262869975451
559	GFAP	2	1	0.0198262845470008
560	ACO2	1	3	0.019817675890109
561	SPCS2	2	1	0.0198171986994775
562	MIB1	1	4	0.0198119092449369
563	WDR13	2	1	0.0198095801948565
564	RNF44	1	4	0.0198078748334316
565	SALL1	1	4	0.0198044378773832
566	SPAG9	2	1	0.0198036265443704
567	MCFD2	1	3	0.0198011039002006
568	SOX8	2	1	0.0197924517916509
569	ZFR	1	3	0.0197664526208801
570	TRIB2	1	3	0.0197461735227415
571	MAT2A	1	3	0.0197425935181535
572	ARMCX3	1	3	0.019739597360348
573	JUN	1	3	0.0197382994993788
574	CLK1	2	1	0.0197356219905388
575	ADH5	1	4	0.0197297639050593
576	ATP2B1	2	1	0.0196756284961436
577	RPL31	2	1	0.0196725106084897
578	ERLEC1	2	1	0.0196703140154183
579	IARS2	2	1	0.0196695285872917
580	NASP	2	1	0.0196615697755002
581	C1QBP	1	3	0.0196458840992123
582	RPL39	1	4	0.0196373876539507
583	SLC1A3	1	3	0.0196290163782532
584	TRAFD1	1	4	0.0196273246091661
585	ENSMMUG00000055584	2	1	0.0196223827783873
586	BTF3	1	3	0.019621085671679
587	PGM1	1	3	0.0196162405869573
588	SDF2	1	4	0.0196124923003725
589	MEN1	1	3	0.0196051202416143
590	ENSMMUG00000015610	2	1	0.0196014753469806
591	ING1	2	1	0.0195960836050629
592	GLUL	1	4	0.0195933272675995
593	TCF4	2	1	0.0195855469683436
594	AGO1	2	1	0.019572592304843
595	PNN	1	3	0.0195657750195732
596	CCDC88A	1	3	0.0195592293927394
597	SS18L1	1	4	0.0195584834673251
598	RBM6	2	1	0.0195517477257611
599	C1H1orf21	2	1	0.0195438456585663
600	ID2	2	1	0.0195409696261145
601	PRPF4B	1	3	0.0195355192440154
602	EIF3B	2	1	0.0195316979545866
603	ENSMMUG00000056043	1	4	0.0195263032480002
604	RFX4	2	1	0.0195169697995798
605	MYL6B	2	1	0.0195114455471052
606	MED13L	2	1	0.0195085554017774
607	TOP2B	2	1	0.0194912451724895
608	ATP6V1G1	1	3	0.0194879365021165
609	DDX39B	1	4	0.019480753070742
610	JAK1	2	1	0.019478459504707
611	PGD	2	1	0.019476564560294
612	RUFY3	1	4	0.0194720286905045
613	KHDRBS1	1	3	0.0194710658451893
614	AK4	1	4	0.0194706932175396
615	VPS52	2	1	0.0194675293311255
616	GFM1	1	3	0.0194531981785885
617	ENSMMUG00000001210	2	1	0.0194504248441327
618	HMGB1	2	1	0.0194471863818108
619	CCDC88A	2	1	0.0194404607149602
620	RPS5	1	3	0.0194375321855379
621	PPM1G	1	3	0.0194348545307267
622	HTATSF1	2	1	0.0194302812657223
623	ENSMMUG00000050336	1	4	0.0194150817834352
624	UBE2D1	1	3	0.0194081067703575
625	VEZF1	1	4	0.0194070234967498
626	HMGCS1	2	1	0.0193936777847414
627	RPS4X	1	3	0.0193821366462636
628	HDGFL3	1	3	0.0193597696200869
629	ZEB1	1	4	0.0193594107055383
630	PPDPF	1	3	0.0193402820639885
631	RAB5B	2	1	0.019337094405787
632	DCTN6	2	1	0.0193265489279414
633	HNRNPC	1	4	0.0193222380616304
634	NDUFA12	2	1	0.0193168192115213
635	SLC25A39	1	3	0.0193124033562493
636	TCEAL8	1	3	0.0193103941362678
637	ENSMMUG00000028689	1	4	0.0193010387151157
638	CETN2	2	1	0.0193005995070659
639	DST	2	1	0.0192979344713099
640	SPARC	1	3	0.0192943749189359
641	GPAA1	1	3	0.019292619039752
642	GDI1	1	3	0.0192618928268443
643	GPM6B	1	3	0.0192586154363423
644	RBM39	2	1	0.0192571076083778
645	CKB	1	4	0.0192423236229483
646	UBE2L3	1	4	0.0192314732935972
647	TCF12	2	1	0.0192132933741019
648	ZNRF1	2	1	0.0192108252380849
649	USP33	2	1	0.0192085087968167
650	ENSMMUG00000042951	1	4	0.0192079838707323
651	CCNI	1	4	0.0192039929732544
652	GOLM1	2	1	0.0192037520603076
653	SYT1	1	3	0.0192014416119067
654	ZBTB18	1	4	0.0191993023966089
655	HSDL2	1	4	0.0191948501826837
656	SRSF11	2	1	0.0191852530866736
657	TRIM8	1	3	0.0191828167646712
658	SCG5	2	1	0.0191795973338357
659	CSNK2A1	2	1	0.0191767393851619
660	C18H18orf32	2	1	0.0191765609540194
661	MAPK8IP1	1	3	0.0191702490695897
662	ENSMMUG00000052035	1	4	0.019163692701328
663	AKAP12	1	4	0.0191620306303781
664	ANP32E	2	1	0.0191577745988958
665	CLIC4	1	3	0.0191546198580755
666	PSMD14	2	1	0.0191503584719858
667	ENSMMUG00000005593	1	3	0.0191405735729242
668	ENSMMUG00000012019	1	3	0.0191391801033995
669	PSMD13	1	4	0.0191352085713255
670	NUDT3	2	1	0.0191183045685156
671	SNF8	1	3	0.01911523257094
672	TRIP12	2	1	0.0191134977398424
673	BRD4	2	1	0.0191131401630395
674	ENSMMUG00000017466	1	3	0.019109832972584
675	SMARCC1	1	3	0.0191055302296836
676	RDX	1	3	0.0190941913291649
677	PUF60	2	1	0.0190917476978827
678	HNRNPR	2	1	0.0190868723587934
679	MATR3	2	1	0.0190702179268468
680	WIPI2	2	1	0.019066140395506
681	BLMH	1	4	0.0190638698460476
682	DEK	2	1	0.0190633357177928
683	CMC4	2	1	0.0190552768626489
684	TWF1	1	3	0.0190428535726865
685	PPP4R3B	2	1	0.0190373374006101
686	TIMP3	2	1	0.0190323889146077
687	TMED10	1	3	0.0190294490970223
688	HEPACAM	1	4	0.0190276674681364
689	ATP1A2	2	1	0.0190263559276164
690	ENSMMUG00000011868	1	4	0.019025968640759
691	PRDX5	2	1	0.019024260853335
692	SKA2	1	4	0.0190125445886135
693	MLEC	1	3	0.0190112795291793
694	RPL35A	1	3	0.0190109784304789
695	ILF2	2	1	0.0190105665697788
696	VPS36	1	3	0.0190105368603765
697	GOLGA7	1	3	0.019004972998118
698	SEPTIN11	1	3	0.0189991606575681
699	TMEM98	2	1	0.01899848154664
700	SYNCRIP	2	1	0.0189977017447026
701	MATR3	1	3	0.0189966726320242
702	CEP170	2	1	0.0189750593001088
703	SCAMP1	1	3	0.0189735742763643
704	SEPTIN7	1	3	0.0189601680347406
705	GNB1	1	3	0.0189470161750777
706	RPL37A	1	4	0.0189450348237792
707	ATP5PO	1	3	0.0189434340145649
708	RPS13	1	4	0.0189416448135273
709	ZFR	2	1	0.0189388997243351
710	YIPF3	2	1	0.0189384506564736
711	NME2	2	1	0.0189364684082904
712	MAML2	2	1	0.0189281295753442
713	Metazoa-SRP	1	4	0.0189197991377706
714	IMPAD1	2	1	0.0189167789443456
715	NCOR2	2	1	0.0189162473858356
716	ABHD2	1	3	0.0189123994732148
717	ELOA	2	1	0.0189009089640076
718	ENSMMUG00000016898	2	1	0.018886685679221
719	SELENOK	1	3	0.018885197234142
720	SMPD3	2	1	0.018881809607249
721	COX7C	1	3	0.0188791553182431
722	ENSMMUG00000003073	1	4	0.0188692709473125
723	TTC19	2	1	0.0188502019647347
724	SAP18	2	1	0.0188499272069008
725	ENSMMUG00000057449	1	3	0.0188481993088308
726	ENSMMUG00000012140	2	1	0.0188442132724782
727	VDAC3	1	3	0.0188436531905477
728	FUBP1	1	3	0.0188434231011405
729	JMJD1C	1	4	0.0188401390371422
730	SLC29A1	1	3	0.0188357600761163
731	TFAM	1	3	0.018835203139711
732	FAU	1	4	0.0188204334061476
733	EIF5	1	4	0.018818864040465
734	BTBD1	2	1	0.0188109934630213
735	ENSMMUG00000039070	1	4	0.0188085217456442
736	CHMP4B	1	3	0.0188066246341167
737	C18H18orf32	1	4	0.018805875866479
738	ENSMMUG00000019570	1	3	0.0188047821726492
739	HNRNPA2B1	1	3	0.0188010742702403
740	EIF4A2	1	3	0.0187997846458367
741	TRA2A	1	4	0.0187944242225738
742	NFIA	2	1	0.0187848975481296
743	BLVRA	1	3	0.0187847003009313
744	MAGED1	2	1	0.0187796220170684
745	DPP3	2	1	0.0187711444279097
746	ADSS2	2	1	0.0187529381801475
747	IDH2	2	1	0.0187514326544889
748	MIDN	2	1	0.0187500821631016
749	ATXN10	1	3	0.018741938587538
750	FXYD6	1	4	0.0187401338025145
751	PANK4	1	4	0.0187332230086804
752	NUDT3	1	3	0.0187254157839379
753	DDOST	1	3	0.0187232481807645
754	MAP1LC3B	2	1	0.0187135349877828
755	AKR1B1	1	3	0.0187125878954254
756	HSPA8	1	3	0.0186943928694476
757	CD47	1	3	0.0186876913326435
758	SLC29A1	2	1	0.0186820799610145
759	PJA2	2	1	0.0186813930254072
760	RPL3	1	3	0.0186795424896863
761	PHF12	2	1	0.0186786564708691
762	RPS4X	1	4	0.0186783218554176
763	SERBP1	1	3	0.018677681931698
764	RSL24D1	1	3	0.0186721454392616
765	ZNF277	2	1	0.0186676229200593
766	CXXC5	1	4	0.0186668492493919
767	CARHSP1	1	3	0.0186466712067652
768	NOL7	1	3	0.0186401253511508
769	YWHAZ	1	3	0.0186400550302138
770	TFDP1	1	4	0.0186375526302681
771	TPT1	1	3	0.0186186950499288
772	ENSMMUG00000018240	1	3	0.0186107356185868
773	SEC61A2	1	3	0.018606548734947
774	USP5	1	4	0.018601073246535
775	GDI1	1	4	0.0186001100282381
776	ENSMMUG00000028699	2	1	0.0185988847317124
777	ENSMMUG00000064286	1	3	0.0185987645706026
778	TCF12	1	3	0.018595880330891
779	SRPK2	1	3	0.0185904549378423
780	NDUFB8	1	3	0.0185875823112402
781	CCT6A	1	3	0.018582775954289
782	ENSMMUG00000028689	2	1	0.0185825935912725
783	DNAJC9	2	1	0.0185807030534969
784	USP5	2	1	0.0185797673328148
785	PEA15	2	1	0.0185790967741252
786	CKB	2	1	0.0185772099573457
787	EIF3D	1	4	0.0185752815808138
788	PTP4A1	1	3	0.0185728791130864
789	SUZ12	1	3	0.0185487234036221
790	ATP1A2	1	3	0.0185402934675343
791	TMED2	2	1	0.0185397580750222
792	PAPOLA	1	3	0.0185394086054146
793	SNRPD1	1	4	0.0185393940862384
794	CYC1	1	3	0.0185377174248952
795	KDM3B	1	3	0.0185333730658996
796	CNBP	2	1	0.0185235168181572
797	HSPA8	2	1	0.0185229163745445
798	ATP1B2	1	4	0.0185222921894714
799	UBE2A	1	3	0.0185212076747944
800	CDC42	2	1	0.0185176015921073
801	CPSF7	2	1	0.0185159811904806
802	VCP	1	4	0.0185134948105815
803	SNX6	2	1	0.0185110750754322
804	VPS28	2	1	0.0185065792487015
805	PPP4R3A	2	1	0.0185048506480996
806	NASP	1	3	0.0185017559632027
807	GNAQ	1	4	0.0184966059565744
808	IRS2	1	3	0.0184869446640933
809	FAU	2	1	0.0184866220972123
810	C18H18orf32	1	3	0.0184801770605684
811	COX1	1	3	0.0184773375581045
812	WAC	2	1	0.0184747958090729
813	TCAF1	1	4	0.0184727509234778
814	MED28	2	1	0.0184702068896811
815	CSNK1D	1	4	0.018441421526381
816	HES1	1	3	0.0184361656746504
817	DYNC1I2	2	1	0.0184273379679331
818	ENSMMUG00000001645	2	1	0.0184267577846272
819	KIAA0930	1	3	0.0184267262350269
820	ARHGAP5	1	3	0.0184245792876536
821	ENSMMUG00000012140	1	4	0.0184211199952789
822	ENSMMUG00000019238	1	3	0.0184169972323537
823	GOLGA4	2	1	0.0183962720887989
824	SUCLG2	2	1	0.0183962563138107
825	YWHAB	1	4	0.0183916656894452
826	ILF3	1	3	0.0183898398994507
827	ENSMMUG00000022075	1	4	0.0183859066472317
828	RPL27	1	4	0.0183823883002586
829	HNRNPLL	1	3	0.0183787527015502
830	SERBP1	1	4	0.018376497510379
831	ODC1	2	1	0.0183719488791753
832	CDC123	2	1	0.0183690022904573
833	CTR9	1	4	0.0183676514939232
834	SKA2	2	1	0.0183636014712445
835	TCEA1	1	3	0.0183621697839755
836	STK24	1	3	0.0183601011955177
837	UBA52	1	4	0.0183473176749263
838	CREB1	2	1	0.0183464128537759
839	ATF4	1	4	0.0183369179471331
840	RPL39	2	1	0.018336734087123
841	RPL24	1	3	0.0183327625129079
842	PARG	2	1	0.0183153999669206
843	FNBP1	1	3	0.0183085644170976
844	SUGP2	2	1	0.0183042915913618
845	LRSAM1	2	1	0.0183002806481448
846	RPS20	2	1	0.0182954399086835
847	SNW1	2	1	0.018293100779819
848	KTN1	1	3	0.0182914687687892
849	ST13	1	4	0.0182817621464592
850	ZNF708	2	1	0.0182795825129387
851	GOLGA7	2	1	0.0182640303520421
852	ZFAND3	1	3	0.0182609484952295
853	RGMA	1	3	0.018252767506748
854	MTF2	1	3	0.0182483897737765
855	TPI1	1	4	0.0182419854626315
856	RAD21	1	3	0.0182400446182876
857	ARL3	2	1	0.0182364318032161
858	RETREG2	2	1	0.0182299104456664
859	DAZAP2	1	3	0.0182206236063502
860	TNC	1	4	0.0182194592853201
861	RALA	1	3	0.0182164129630757
862	GPSM1	1	4	0.0182133597800222
863	YWHAE	2	1	0.0182130205934802
864	PSMC2	2	1	0.0182043285040773
865	WDR83OS	2	1	0.0182026243559439
866	URI1	1	3	0.0181855385058568
867	ENSMMUG00000021075	2	1	0.0181801494872247
868	HNRNPH1	2	1	0.018170372380803
869	TKT	2	1	0.0181616376129825
870	CCT2	1	3	0.0181592399687738
871	CCT4	2	1	0.018149499650412
872	DNAJC8	2	1	0.0181373246525633
873	MORN2	1	4	0.0181246355014038
874	CS	1	4	0.0181240520053339
875	MYL6	2	1	0.0181217388576857
876	CPSF4	2	1	0.0181213685516272
877	NSMCE1	1	3	0.0181177430263639
878	DBI	2	1	0.0181049304425354
879	CSE1L	1	3	0.0180962024723969
880	ARF4	1	3	0.0180929460284376
881	HMGCR	1	4	0.0180869675776098
882	DDX17	1	4	0.0180856103214501
883	NSA2	2	1	0.0180836711117376
884	ATXN10	1	4	0.0180832057727833
885	MDH1	2	1	0.0180823404723075
886	MAP2	2	1	0.018081029918424
887	ITFG1	1	3	0.018080220555733
888	GMCL1	2	1	0.0180746579209108
889	H1.0	2	1	0.0180592676516196
890	SLC35B2	1	4	0.0180514339571659
891	MRAS	2	1	0.0180479307209401
892	CDH2	2	1	0.0180475280100974
893	SRSF10	1	3	0.018044898791592
894	ETF1	2	1	0.0180396388494639
895	NSMF	1	4	0.0180377049271192
896	GNA13	1	3	0.0180372284397844
897	ARPC3	2	1	0.018021613822089
898	GATAD2B	2	1	0.0180149985050336
899	RAB35	1	4	0.0180146878005411
900	TSEN34	1	3	0.0180138370225762
901	RAB1A	1	3	0.0180118539940374
902	ENSMMUG00000006608	1	3	0.018011555639152
903	WDR48	2	1	0.018006643134768
904	COX3	2	1	0.0180021875805306
905	AP3D1	1	4	0.0179945695252672
906	NAP1L5	2	1	0.0179918297263313
907	SMU1	2	1	0.0179801970771841
908	HNRNPK	1	3	0.0179769318350138
909	YWHAH	1	4	0.0179743739471827
910	HINT1	2	1	0.0179742974040292
911	HMGB1	1	4	0.0179703183573076
912	SLF1	1	3	0.0179681835913014
913	CCT5	2	1	0.0179655474688903
914	RPL13A	1	3	0.0179596723407763
915	CD9	2	1	0.0179558439043914
916	U2AF2	2	1	0.0179475788745801
917	ZNF195	2	1	0.0179470758523596
918	NAA16	2	1	0.0179354460703552
919	ENSMMUG00000061128	1	4	0.0179319379607469
920	PER1	1	3	0.0179292924992283
921	PREPL	2	1	0.017924850444306
922	OAZ2	2	1	0.0179132276372162
923	MAPK6	2	1	0.0179072606621924
924	SF1	1	3	0.0179065331723244
925	ENSMMUG00000030448	1	3	0.0178984327008001
926	PDIA3	1	4	0.0178940731411265
927	TAF7	1	3	0.0178895540102174
928	SNRPA1	1	4	0.0178842532109422
929	TEX261	1	3	0.0178830659260815
930	OCIAD1	1	4	0.0178824511754897
931	FAM110B	1	4	0.0178801977516794
932	ARID4B	2	1	0.017879196848623
933	UPF3A	1	4	0.0178745988631684
934	ZBTB18	1	3	0.01786338973255
935	WLS	1	3	0.0178540777442998
936	VDAC2	1	3	0.017853594182789
937	PPP3CC	1	4	0.0178531110146836
938	C4H6orf89	2	1	0.017848753829632
939	SH3GLB1	1	3	0.0178458715679974
940	ACTR1B	2	1	0.0178403440164683
941	ENSMMUG00000029987	1	4	0.0178295684744021
942	CHCHD2	1	3	0.0178277778714269
943	KAT6B	1	3	0.0178265711718906
944	AMOTL2	2	1	0.0178262054338404
945	SF3B1	2	1	0.0178252350036709
946	AIF1L	2	1	0.0178234247198703
947	MARCKSL1	1	4	0.0178226911966079
948	RNF215	1	3	0.0178220147768337
949	PTPN12	2	1	0.017816968107064
950	MAP7D3	1	4	0.0178102289066849
951	SEPTIN8	1	4	0.0178093366267606
952	ACIN1	1	3	0.0178075049953792
953	RPL35	1	3	0.0178070286893451
954	ENSA	2	1	0.017800787286014
955	GID8	1	3	0.017800599669846
956	TPT1	2	1	0.0177989115367028
957	RPS27L	1	4	0.0177915644890724
958	BTG1	2	1	0.017781906695313
959	H2AFY	1	3	0.0177809253675329
960	ARHGAP5	2	1	0.0177785234307355
961	ND1	1	3	0.0177781737812284
962	ETFA	2	1	0.0177692226500887
963	SOX9	1	3	0.0177634848483128
964	EEF2	2	1	0.0177627414024129
965	WASF1	2	1	0.0177618235703059
966	ATP5F1D	1	3	0.0177582256057263
967	ATP5F1D	1	4	0.0177546291109869
968	TOLLIP	1	4	0.0177520206708947
969	MYL6	1	4	0.0177474847192418
970	ITGA6	1	4	0.0177456850023035
971	MBTPS1	1	3	0.0177453262591378
972	ARFGAP3	1	3	0.0177444461570901
973	WSB1	1	3	0.0177441906690497
974	EIF4G3	1	3	0.0177378654482629
975	EID1	2	1	0.0177361450044301
976	CAB39	2	1	0.0177353678174792
977	FARP1	1	3	0.017724420429004
978	DCP1A	2	1	0.0177132226644592
979	MRPL3	2	1	0.0177108290497372
980	PANK2	1	3	0.0177084544328957
981	FMC1.LUC7L2	1	3	0.0177059902683812
982	SPRED1	2	1	0.0177028215258844
983	GPCPD1	1	4	0.0177008911116507
984	TRAF4	2	1	0.0176871034494693
985	GTF2A2	1	4	0.0176713482780853
986	CD81	2	1	0.0176703284001921
987	PRDM2	1	3	0.0176698199302441
988	ZNF608	2	1	0.0176691242533942
989	MEA1	1	3	0.0176678514060425
990	CCT6A	1	4	0.0176570959200133
991	MBTPS1	2	1	0.0176567063234238
992	NDFIP1	1	3	0.0176553008409997
993	SYT11	2	1	0.0176490855089218
994	ACBD5	1	3	0.0176387743893726
995	ENSMMUG00000040370	1	4	0.0176360003529825
996	CNN3	1	3	0.0176353545365276
997	CTTNBP2NL	1	3	0.0176310926775265
998	PPP2R1A	2	1	0.0176260938773216
999	LRRC3B	1	4	0.0176239413384858
1000	RPL39	1	3	0.0176234034255847
1001	ND2	2	1	0.0176218995703672
1002	PABPC1	2	1	0.0176217932353104
1003	MID1IP1	1	4	0.0176152004232586
1004	HIF1A	1	3	0.0176066472947229
1005	SLC37A3	1	4	0.0176059432109345
1006	RFC4	2	1	0.0175949213289037
1007	RPS3	1	4	0.017593364915359
1008	OLA1	1	3	0.0175914373392156
1009	PSMD12	2	1	0.017583716802959
1010	SRSF6	1	3	0.01757269347943
1011	DDR1	1	3	0.0175683857639961
1012	RWDD1	1	3	0.0175683410435497
1013	ERH	2	1	0.0175657724198565
1014	FBXW7	1	4	0.017558765653251
1015	H2AFY2	2	1	0.017557314173671
1016	NSL1	1	3	0.0175562125401251
1017	GPM6A	1	4	0.0175505821190872
1018	ENSMMUG00000018157	1	3	0.0175488624562218
1019	KMT2C	2	1	0.0175446708177034
1020	ENSMMUG00000065246	2	1	0.0175384612190353
1021	SOS1	1	3	0.0175361747072963
1022	CLDND1	1	4	0.017535514847459
1023	PPP3CA	1	3	0.0175344565254767
1024	ORMDL1	1	3	0.0175343467963337
1025	EIF3I	2	1	0.0175320458466661
1026	GLO1	2	1	0.017519677037816
1027	TAF6	1	3	0.0175173417733848
1028	WDR44	2	1	0.0175172655652789
1029	RAN	1	4	0.0175163162852718
1030	NONO	1	3	0.01751349137062
1031	SMIM19	2	1	0.0175087756512063
1032	MAGED1	1	3	0.0175026196932221
1033	ENSMMUG00000012019	2	1	0.01749646750037
1034	ENSMMUG00000049151	1	4	0.0174880245436393
1035	GNAI3	2	1	0.0174781913441957
1036	PDGFRA	1	4	0.0174741644859783
1037	RSRC1	2	1	0.0174660315125857
1038	ZC3H15	2	1	0.0174625650005581
1039	CLPTM1	1	4	0.0174492706688458
1040	PHF14	1	3	0.0174474072939071
1041	ENSMMUG00000065362	1	3	0.0174395151215527
1042	RPS20	1	3	0.0174338351942102
1043	SLC25A44	2	1	0.0174327374781065
1044	MRPL20	1	4	0.0174322569112887
1045	HNRNPUL1	2	1	0.0174260863303457
1046	PRRC2B	2	1	0.0174240589499581
1047	THRAP3	1	3	0.017417778725432
1048	RPL4	2	1	0.0173996647224463
1049	ABHD12	1	3	0.0173939272165451
1050	SLC25A23	1	3	0.0173918524941504
1051	ALDH6A1	1	3	0.0173906522282957
1052	OAZ1	1	3	0.0173853465007789
1053	ND3	1	3	0.0173849510841164
1054	ENSMMUG00000006293	1	3	0.0173805410130283
1055	PRKAR1A	1	4	0.0173715736270542
1056	BCL2L2.PABPN1	1	4	0.0173693981896126
1057	KBTBD2	1	4	0.0173618167936994
1058	ENSMMUG00000030465	2	1	0.0173553890027196
1059	ANXA5	2	1	0.0173506906117988
1060	RPL15	1	3	0.0173497132734258
1061	TRIM23	1	3	0.0173464974770942
1062	SNU13	1	3	0.0173427965449085
1063	RPL27	2	1	0.0173399913372132
1064	USO1	1	3	0.017329189596197
1065	XRN2	1	4	0.0173280699153986
1066	FTH1	2	1	0.0173241582620203
1067	ZNF581	2	1	0.0173168413595031
1068	RPL22L1	2	1	0.0173159880056973
1069	GABBR1	2	1	0.0173134723468148
1070	QDPR	1	3	0.0173063519418018
1071	SAP18	1	3	0.0173063248548088
1072	HYAL2	1	4	0.0172959556732972
1073	RTRAF	1	3	0.0172933233337949
1074	RPL15	1	4	0.0172862742014001
1075	NOP53	2	1	0.0172810414114043
1076	TMEM14B	1	3	0.0172797886918791
1077	MTURN	2	1	0.0172769236542467
1078	MRFAP1	1	3	0.0172734132721607
1079	USP47	2	1	0.0172723389505465
1080	ENSMMUG00000009406	1	3	0.017268566118147
1081	ARHGEF9	2	1	0.0172669565506498
1082	ENSMMUG00000064760	1	3	0.0172654679206142
1083	MT1E	1	3	0.0172592295031235
1084	RNF130	1	3	0.0172588397106064
1085	APEX1	1	4	0.0172509772450118
1086	SLIRP	2	1	0.0172483835591137
1087	DKK3	1	4	0.017242564646363
1088	CADM3	1	3	0.0172418247051792
1089	CALCRL	1	3	0.0172412547294427
1090	AKAP12	2	1	0.0172355343565659
1091	SERPINE2	2	1	0.0172330838511349
1092	MAGEH1	1	4	0.0172314284379251
1093	SERINC5	1	4	0.0172279176409609
1094	RPS26	1	4	0.0172249519435044
1095	RPS21	1	4	0.0172235341046202
1096	PJA2	1	4	0.017218754172196
1097	ELN	2	1	0.0172167942725208
1098	TRIM24	1	3	0.0172144914401841
1099	IPO7	1	3	0.017213372257679
1100	KRTCAP2	2	1	0.017210009416282
1101	TCERG1	1	4	0.0172081313760588
1102	NFYB	1	3	0.0172063832174347
1103	CCT6A	2	1	0.0172001596610656
1104	RBM39	1	4	0.0171997957339584
1105	ENSMMUG00000064281	1	4	0.0171995865816625
1106	DNAJC15	1	4	0.0171991338839413
1107	RPS29	1	4	0.0171973044977948
1108	TSC22D1	2	1	0.0171969175591979
1109	CHD4	1	3	0.0171937123001352
1110	TRIP12	1	3	0.0171893504390398
1111	WAC	1	3	0.0171891178235205
1112	ENSMMUG00000051392	1	3	0.0171865457660492
1113	MBD3	2	1	0.0171823036745071
1114	RAB8B	1	3	0.0171821287717867
1115	WBP1L	1	4	0.0171805000031159
1116	CFL1	1	3	0.0171740297463235
1117	ANKRD10	1	3	0.0171715641676422
1118	IFT57	2	1	0.0171710517714677
1119	ANKFY1	1	4	0.0171675153749091
1120	MIER1	1	3	0.0171658179814419
1121	ITFG2	2	1	0.0171657245576723
1122	FABP7	1	3	0.0171628137509804
1123	TRIR	1	3	0.01715886668404
1124	RDH11	1	3	0.0171579072781115
1125	ZBED5	1	3	0.0171551635829738
1126	FUT10	2	1	0.0171502702974315
1127	TTC3	1	4	0.017146795843455
1128	PSMG1	2	1	0.0171444971539612
1129	ENSMMUG00000030408	2	1	0.0171418041001092
1130	PJA2	1	3	0.0171414657253255
1131	XPNPEP1	1	3	0.0171396012440358
1132	DBN1	1	4	0.0171369361519066
1133	COPS3	1	4	0.0171329648396998
1134	SNX5	1	3	0.0171327891487826
1135	CERS5	1	3	0.0171247447451152
1136	NAP1L4	1	3	0.0171225116038605
1137	RAB18	1	4	0.01711945979506
1138	ABHD17A	1	4	0.0171192431888703
1139	UBTD2	1	3	0.0171183475222651
1140	KIAA1109	1	3	0.0171162064240209
1141	COPB1	2	1	0.017111614256625
1142	RNF40	1	3	0.0171069923430078
1143	GNG5	1	4	0.0171062357897805
1144	SOX4	2	1	0.0170949740896625
1145	SEC61B	1	3	0.0170880913945016
1146	CREB5	2	1	0.0170854721489808
1147	FAM181B	2	1	0.0170816675771033
1148	EIF4H	1	3	0.0170792009479371
1149	DENR	1	3	0.0170788841912656
1150	TOPBP1	1	3	0.017075288158321
1151	GNB2	1	3	0.0170742158553685
1152	ECHDC1	2	1	0.017070295308943
1153	PAK2	1	3	0.0170684071964133
1154	SDCBP	1	4	0.0170648377838023
1155	UTP18	1	3	0.0170633262617503
1156	DNAJB2	2	1	0.0170543859631229
1157	ICAM3	2	1	0.0170526626055303
1158	TSEN34	2	1	0.0170495176929042
1159	ENSMMUG00000000249	2	1	0.0170485713808618
1160	ANKRD26	1	3	0.0170459809643565
1161	ENSMMUG00000011798	1	4	0.0170452069268098
1162	LUC7L	2	1	0.0170437077366101
1163	THOC2	1	3	0.0170358867421561
1164	FXR1	2	1	0.0170313355340749
1165	GOLIM4	2	1	0.0170225827955711
1166	SETD7	1	4	0.017019144839392
1167	ZFAND5	2	1	0.0170162904079358
1168	LAP3	1	3	0.0170139286405673
1169	LITAF	1	4	0.0170103079235964
1170	CDC42EP4	1	4	0.0170037809436502
1171	TMEM218	1	3	0.0170023715061452
1172	NKIRAS2	2	1	0.0169950977380359
1173	NFIA	1	3	0.0169933366032478
1174	ATP5F1E	1	4	0.0169929993536536
1175	RAB14	1	4	0.0169920111761574
1176	RPS28	2	1	0.0169900676106769
1177	RBM4B	1	3	0.0169863275804947
1178	DCAF8	1	4	0.0169862865635923
1179	NDFIP1	2	1	0.0169854425341007
1180	CCP110	1	3	0.0169820941139537
1181	BUD13	2	1	0.0169790403730067
1182	RNF11	1	4	0.0169787304066125
1183	CSNK1D	2	1	0.0169763941572423
1184	ENSMMUG00000061824	2	1	0.0169718398781851
1185	TPP2	1	3	0.0169696136706154
1186	RPL31	1	3	0.0169664063023816
1187	SCD	1	3	0.0169640980762524
1188	C11H12orf57	1	4	0.0169640351500558
1189	NRDC	1	4	0.0169638228421536
1190	SUMO3	1	3	0.01696134233794
1191	GTF2I	2	1	0.0169610446631853
1192	PAPSS1	2	1	0.0169590742559569
1193	SNX2	1	4	0.016947281370128
1194	RPS29	2	1	0.0169460750107006
1195	SEPTIN2	1	3	0.0169454716935937
1196	DDX1	1	3	0.0169449367525965
1197	UBQLN1	2	1	0.0169422833573327
1198	CNOT6	2	1	0.0169418925617252
1199	RAP1A	1	3	0.0169406866410432
1200	TPM3	1	4	0.0169375718139677
1201	CUL5	2	1	0.0169309082555843
1202	OARD1	1	3	0.0169297707206598
1203	ENSMMUG00000052747	2	1	0.0169278086459384
1204	PWP1	1	3	0.0169258076703863
1205	ZNF436	2	1	0.0169146422711823
1206	YEATS2	2	1	0.0169129295772991
1207	CCNL1	1	4	0.0169120688940461
1208	SFSWAP	2	1	0.0169098623585967
1209	GIT1	1	3	0.0169088943288294
1210	HEATR5A	1	4	0.0169069445518131
1211	KPNB1	1	4	0.0169043516960912
1212	PXK	2	1	0.016904199554128
1213	CSRNP3	1	3	0.0169022317483919
1214	CDIP1	1	3	0.0169013921616321
1215	CD63	2	1	0.0169013253634131
1216	PDLIM5	2	1	0.0168983746216105
1217	SRC	2	1	0.0168946159704649
1218	LITAF	1	3	0.0168945031337352
1219	RPL32	2	1	0.0168941750285387
1220	ENSMMUG00000003073	1	3	0.016885827357374
1221	SLC22A17	1	3	0.0168830289702952
1222	SCAMP1	1	4	0.0168803366627335
1223	NDUFB4	2	1	0.016879087947578
1224	CCT5	1	3	0.0168788005022595
1225	ANXA5	1	4	0.016877746134132
1226	GID8	2	1	0.016876560744205
1227	DNM1L	2	1	0.0168735685454608
1228	GNG2	2	1	0.0168682276029805
1229	COX7A2	2	1	0.016866661756211
1230	ZNF226	1	3	0.0168650096435644
1231	RBM22	2	1	0.0168638116677476
1232	TMEM50B	1	3	0.0168607069282554
1233	DLX1	2	1	0.016859992069588
1234	GAPVD1	1	3	0.0168587963986357
1235	TMEM131L	2	1	0.0168560381819692
1236	EEF1A1	2	1	0.0168534708950887
1237	DYNLL1	1	3	0.0168370008766864
1238	H2AFX	2	1	0.0168353721148786
1239	TRIM8	1	4	0.0168339612030557
1240	GTF3C6	1	3	0.0168325540557589
1241	ZYX	1	4	0.0168312123587149
1242	SRP72	1	3	0.0168296249013963
1243	TMEM47	1	4	0.0168214867631107
1244	FADS2	1	4	0.0168172071240962
1245	SERPINH1	2	1	0.0168164547572501
1246	PPT1	2	1	0.0168163531232574
1247	TRAM1	1	4	0.0168145299308742
1248	GDI1	2	1	0.0168124118418069
1249	TTC3	2	1	0.0168122603873286
1250	AKIRIN2	1	3	0.0168118320354655
1251	KIF21B	1	3	0.016811238521692
1252	CCDC115	1	3	0.0168080855987369
1253	SIDT2	1	3	0.0168059111148146
1254	OXSR1	1	4	0.0168028280294911
1255	RTN1	1	4	0.0167993340453386
1256	CLIP3	2	1	0.0167977617632519
1257	RPL10	1	3	0.0167965857611508
1258	STMN1	1	3	0.0167963449282937
1259	LSM14A	2	1	0.0167926104429144
1260	IFI27L2	1	3	0.0167900449116931
1261	VEGFA	1	3	0.0167841189435615
1262	HNRNPH3	2	1	0.0167783696812635
1263	EHD3	1	3	0.0167775800647826
1264	ENSMMUG00000058755	1	4	0.0167767573600604
1265	NCKAP1	1	4	0.0167757298863494
1266	ADAR	2	1	0.0167732057355995
1267	SRSF6	2	1	0.0167731737995923
1268	LAPTM4A	1	3	0.0167710010232987
1269	CHIC2	2	1	0.0167709120967811
1270	SND1	2	1	0.0167682204855032
1271	NFIB	1	4	0.0167661850674784
1272	DNAJA1	1	3	0.0167616312404808
1273	CPSF6	2	1	0.0167588379640137
1274	RAB11A	1	3	0.0167580276106306
1275	SOX3	1	3	0.0167548276003521
1276	ETV1	1	4	0.0167547238461707
1277	HM13	2	1	0.0167529627968964
1278	PCBP1	1	3	0.0167525395193802
1279	RAP1B	1	4	0.0167523871602492
1280	ENSMMUG00000056113	1	4	0.0167470575721746
1281	SMARCE1	2	1	0.0167388658046433
1282	AP3S1	1	3	0.0167366844136005
1283	XRCC5	1	3	0.0167331211808279
1284	GAS2L3	1	4	0.0167302736285884
1285	CDC5L	1	3	0.0167273720660501
1286	SEC62	1	4	0.0167272927934776
1287	CTBP1	1	3	0.016726663405634
1288	RNF146	2	1	0.0167262008429914
1289	ZNF354C	1	3	0.0167251809100716
1290	HDAC2	2	1	0.0167238662836758
1291	GLRB	2	1	0.0167200105107251
1292	TSPAN5	2	1	0.0167130892615239
1293	NAXE	2	1	0.0167128069934466
1294	SNX1	1	4	0.016709199222416
1295	SAT1	1	4	0.0167088487506534
1296	RACK1	1	4	0.0167071540724458
1297	SCAMP2	2	1	0.016707067356459
1298	NICN1	1	4	0.0167068498351924
1299	NDN	1	4	0.0167053240228741
1300	TPR	1	3	0.0167012682254151
1301	TCEAL7	1	3	0.0167011455034821
1302	WDR61	2	1	0.0167006809454552
1303	JAM2	1	3	0.0166988656083434
1304	EI24	2	1	0.0166962207214895
1305	INPPL1	2	1	0.0166954921555907
1306	WWC1	1	4	0.0166909761232971
1307	LGI2	1	3	0.0166799717541774
1308	SPTY2D1	2	1	0.0166786139513668
1309	PCMTD2	2	1	0.0166764167692831
1310	CHMP4B	2	1	0.0166740622196059
1311	RAB1A	2	1	0.0166731206202623
1312	TERF2IP	1	4	0.016672427381608
1313	USP8	1	4	0.0166718354197377
1314	CBX1	1	4	0.0166679961539561
1315	EIF4EBP2	1	4	0.0166637777213741
1316	CIBAR1	1	3	0.0166630898562129
1317	PHF12	1	3	0.0166611857089743
1318	TCEAL5	1	4	0.0166581288948362
1319	WIPI2	1	3	0.0166440187440026
1320	CCDC167	1	4	0.0166427054702875
1321	RAB21	1	3	0.016635512044028
1322	UBE2B	2	1	0.0166350156302159
1323	KATNBL1	1	3	0.0166338189130851
1324	HNRNPM	1	3	0.0166257495808101
1325	KDELR2	1	3	0.0166250313838825
1326	CTDSP2	1	4	0.0166233255442411
1327	P4HA1	1	3	0.0166231123078884
1328	PPID	2	1	0.0166220899963453
1329	RPLP2	2	1	0.0166219985895428
1330	TRIM8	2	1	0.0166219834974488
1331	H2AFZ	1	3	0.0166217803831901
1332	KIDINS220	2	1	0.0166212280370557
1333	NDUFA5	1	4	0.0166170111460402
1334	SLC1A3	1	4	0.0166138393025741
1335	SGCE	2	1	0.0166135468070661
1336	EVL	1	3	0.016612682183024
1337	ESF1	1	3	0.0166118894069752
1338	ENSMMUG00000006803	2	1	0.0166024597607723
1339	ENSMMUG00000028695	1	3	0.0165912392564251
1340	NAXE	1	3	0.0165897912054464
1341	MACF1	1	3	0.0165894178952163
1342	EPN2	1	3	0.0165835530491802
1343	SEZ6	2	1	0.0165798370423983
1344	AMZ2	1	4	0.0165778357620953
1345	ARF5	1	3	0.0165777624927094
1346	PPIB	2	1	0.016576223618852
1347	DDX1	1	4	0.0165750076072801
1348	HNRNPH1	1	3	0.0165745807860464
1349	MAPRE3	1	3	0.016568962811268
1350	CDC123	1	3	0.0165658404217331
1351	TMEM59	2	1	0.0165638467152296
1352	NGRN	1	3	0.0165636120195644
1353	UBA1	2	1	0.0165634515175071
1354	TSC22D1	1	3	0.0165634463631625
1355	CCND1	1	3	0.016561548277732
1356	BRWD1	2	1	0.0165560602537416
1357	RNF38	1	4	0.0165523687435261
1358	MFGE8	2	1	0.0165514810598584
1359	RPL18	1	4	0.0165509159930193
1360	CCDC90B	1	3	0.0165460475026072
1361	CBLL1	1	3	0.0165419871444797
1362	SRP14	2	1	0.0165412265872525
1363	ATP5F1B	1	3	0.0165399406389274
1364	CHERP	1	3	0.0165382350378529
1365	RPS13	2	1	0.0165334529724723
1366	RBFA	1	3	0.0165329033205417
1367	AKAP17A	2	1	0.0165311602897985
1368	CDKN1B	1	4	0.0165287938064108
1369	CD82	2	1	0.0165267470353574
1370	ENSMMUG00000001894	1	3	0.016524249065975
1371	CSNK1G2	2	1	0.0165236669524632
1372	THNSL1	1	4	0.0165219455709851
1373	VCP	1	3	0.0165201790246769
1374	ENSMMUG00000065373	1	3	0.0165183254785939
1375	PSMA2	1	3	0.0165041995396426
1376	DHX29	2	1	0.0165025081224592
1377	PLEKHO1	2	1	0.0165014436045015
1378	PPP2R5E	2	1	0.0165003321826591
1379	ZMYND11	2	1	0.0164995788257331
1380	STXBP1	1	4	0.0164975735231166
1381	APMAP	1	3	0.016496548708718
1382	PARK7	1	4	0.0164958568731973
1383	RAB21	1	4	0.016493867361241
1384	UBAP1	1	3	0.0164932638375791
1385	SCAMP3	1	3	0.0164864957028693
1386	PRPF8	1	3	0.0164857601564473
1387	ARHGAP21	1	3	0.0164828272187963
1388	UGDH	1	3	0.0164800984427853
1389	ENSMMUG00000016665	1	4	0.0164794677950346
1390	SFPQ	1	3	0.0164771661154701
1391	PCYOX1	1	3	0.0164759415797039
1392	RAB7A	1	4	0.0164678290299637
1393	ENSMMUG00000060287	1	4	0.016465397464087
1394	TIA1	1	4	0.0164599315047077
1395	B3GAT1	2	1	0.0164580609035831
1396	NUP85	1	3	0.0164571811818244
1397	FAM3C	2	1	0.016454857612781
1398	PDCD4	2	1	0.0164530208745899
1399	SCAF11	1	3	0.0164519173711616
1400	RAD23B	1	4	0.0164386604764284
1401	ACTN4	1	4	0.0164380900801775
1402	AAMP	2	1	0.0164377450884063
1403	KDM1A	1	3	0.0164348620885865
1404	FBXO21	1	3	0.016433733802126
1405	ENSMMUG00000046665	1	4	0.0164331205794813
1406	PTPRA	1	3	0.0164317317166165
1407	WASF1	1	3	0.0164278661715698
1408	BUD23	1	4	0.0164245256335331
1409	TCF3	1	4	0.0164233679695504
1410	USP47	1	3	0.0164229950667984
1411	PEBP1	2	1	0.0164215008819566
1412	RPL10	1	4	0.0164208772687586
1413	CHD2	2	1	0.0164202404216333
1414	HSP90B1	2	1	0.0164194861572564
1415	SNRPA1	2	1	0.0164186007714397
1416	RNF167	1	3	0.0164177589603763
1417	TNRC6A	1	4	0.016417053958038
1418	RPL10A	1	3	0.0164160910599528
1419	ENSMMUG00000064281	1	3	0.0164118298115271
1420	U2AF2	1	3	0.016411261684847
1421	IPO9	2	1	0.0164103906460454
1422	PFDN1	2	1	0.0164065238381861
1423	STMN2	2	1	0.0164059640844424
1424	RPL3	2	1	0.0164048076606081
1425	HNRNPR	1	4	0.0164045866647039
1426	AKT2	1	3	0.0164022929182328
1427	ZNF638	1	4	0.016396081040742
1428	ANKRD12	2	1	0.0163960752207074
1429	SEC11C	2	1	0.0163936012184754
1430	ZNF706	1	3	0.0163927677503421
1431	NOL11	1	3	0.0163916107462486
1432	EXTL2	2	1	0.0163879122470175
1433	RAD21	1	4	0.0163874352237382
1434	E2F4	1	3	0.0163873984873321
1435	CREB1	1	3	0.0163866209115472
1436	ATG12	2	1	0.0163847417594913
1437	CKS1B	1	3	0.0163837212460145
1438	ENSMMUG00000056683	1	3	0.0163831626227202
1439	PRDX2	1	3	0.0163805583231497
1440	KCTD20	1	3	0.0163801473373101
1441	RPL18	1	3	0.0163752501504473
1442	ATF4	2	1	0.0163714778189634
1443	SLC44A5	1	3	0.0163664355079389
1444	NCAN	1	4	0.0163659968965613
1445	ADGRB1	1	4	0.0163634221301951
1446	MRPS12	1	4	0.0163601921020274
1447	DLL1	1	3	0.0163576001536482
1448	NDUFS4	2	1	0.0163542361868651
1449	RPL35A	1	4	0.0163516817925632
1450	ATP5MPL	1	3	0.0163494072760178
1451	KMT2C	1	3	0.016347695912759
1452	RBM17	1	3	0.0163471336031995
1453	ACE	2	1	0.016344751984277
1454	ZNF609	1	3	0.0163447482727101
1455	SEPTIN2	2	1	0.0163404531879708
1456	LRRC59	1	3	0.0163403797835425
1457	COX4I1	2	1	0.0163398996183891
1458	ABAT	2	1	0.0163312600878983
1459	ADCYAP1R1	1	3	0.0163300503179754
1460	NUCKS1	1	4	0.0163268345199519
1461	TOB1	1	3	0.0163266532767208
1462	RRAGA	1	3	0.0163263199337208
1463	ENSMMUG00000049530	1	4	0.0163249121044189
1464	RPS7	2	1	0.0163246693238515
1465	ACTR1A	2	1	0.0163212726093089
1466	AHCYL1	2	1	0.0163168934168113
1467	SYPL1	2	1	0.0163125791628982
1468	TMEM50B	1	4	0.0163105989405957
1469	ENSMMUG00000011868	2	1	0.0163076968350816
1470	STIP1	1	3	0.0163014896997654
1471	COX6C	1	3	0.0162995230799981
1472	RPL32	1	4	0.0162937002011645
1473	TTYH3	1	3	0.0162914286921947
1474	SMARCAD1	2	1	0.0162857189337681
1475	PHF21A	2	1	0.0162816993636476
1476	RAB11A	1	4	0.0162773614992007
1477	RNF11	1	3	0.0162719816342885
1478	RAB21	2	1	0.0162675427777647
1479	JUN	1	4	0.016267361591169
1480	MFGE8	1	3	0.0162655027276714
1481	SCARB2	1	3	0.0162621523524125
1482	ZC3H11A	1	3	0.0162616231497285
1483	TUBB	1	3	0.0162596544189601
1484	SEC22B	2	1	0.016257758627768
1485	ISG20L2	1	4	0.016255056860611
1486	SCRN1	1	3	0.016255007885501
1487	SWT1	2	1	0.016254552601186
1488	HIF1A	2	1	0.0162486225507792
1489	HINT1	1	3	0.0162462760956174
1490	ATP6V1D	1	4	0.0162436928902437
1491	RPLP2	1	4	0.0162420219777351
1492	RANBP1	1	3	0.0162394383738018
1493	DCAF6	1	4	0.016238485809555
1494	PM20D2	2	1	0.0162381270173442
1495	OLFM2	2	1	0.016236873845326
1496	SF1	1	4	0.0162348977816098
1497	TMCO1	1	4	0.0162216156278615
1498	CAPN1	2	1	0.0162169358797222
1499	CCNT1	1	3	0.0162130295030451
1500	CST3	2	1	0.016206410063532
1501	RGCC	1	3	0.0162034872854593
1502	LYRM2	1	4	0.0161921740713475
1503	NAP1L1	1	3	0.0161907855118308
1504	RBM42	1	4	0.0161870191589917
1505	ENC1	2	1	0.016184935794085
1506	MPST	2	1	0.0161847646799168
1507	SENP6	1	4	0.016183204863595
1508	TNRC6A	2	1	0.0161826465891516
1509	CCNI	1	3	0.0161796937323306
1510	HNRNPH2	1	4	0.0161795344172425
1511	AKR7A2	1	3	0.0161778286012331
1512	RBX1	1	3	0.016172110982777
1513	ATP5MC1	1	4	0.016171630529488
1514	BPTF	1	3	0.016170471317086
1515	TYW5	1	3	0.0161689092202552
1516	CLTA	1	4	0.016168729255983
1517	RAPGEF2	1	4	0.0161685840307312
1518	ZNRF1	1	4	0.0161668451409524
1519	MLF2	2	1	0.0161666396453401
1520	MORF4L2	1	4	0.0161639158261777
1521	ANP32B	1	3	0.016162503599071
1522	ENSMMUG00000008417	2	1	0.0161583937172516
1523	NSA2	1	3	0.0161581980291455
1524	FOSB	1	3	0.0161574442084103
1525	VDAC3	2	1	0.0161522456489998
1526	ANAPC13	2	1	0.0161501622537561
1527	TAOK3	1	3	0.0161423524421499
1528	TUT4	1	4	0.0161398144837011
1529	CAPN2	1	3	0.016138404771159
1530	PTPRA	1	4	0.0161381684348306
1531	RBM26	1	4	0.0161376998339475
1532	ENSMMUG00000018740	2	1	0.0161364876327894
1533	JUND	1	4	0.016136370509474
1534	PAFAH1B1	1	3	0.0161330706131952
1535	KLHL8	1	3	0.016131344755932
1536	RDH11	1	4	0.0161286302904987
1537	ENSMMUG00000015563	1	4	0.0161254530553877
1538	CYB5B	1	3	0.0161246755077319
1539	SLC2A10	1	4	0.0161176075779496
1540	BRD2	2	1	0.0161171850350835
1541	NAE1	1	4	0.0161167522244513
1542	ENSMMUG00000053116	1	3	0.0161039904847524
1543	ENSMMUG00000062350	1	3	0.0161032909835475
1544	TMEM161B	1	4	0.0160974572726785
1545	GABARAPL2	1	4	0.0160953827440332
1546	TOX	2	1	0.0160952546371257
1547	FAM127A	2	1	0.0160929504056515
1548	AP3S1	2	1	0.0160921415369136
1549	CGGBP1	1	4	0.0160861008487501
1550	RPS12	2	1	0.0160835296529152
1551	UCHL1	1	4	0.016083107006416
1552	PSMB5	1	4	0.0160807395541904
1553	PAX6	1	3	0.0160785687921115
1554	LASP1	2	1	0.0160685223354864
1555	CAP2	1	3	0.0160631362828266
1556	KPNA4	2	1	0.0160578152684344
1557	EML1	1	3	0.0160561723486154
1558	KRIT1	2	1	0.0160521960965602
1559	RPS21	1	3	0.0160516592064769
1560	TMEM263	1	3	0.0160516353716584
1561	WBP2	1	3	0.0160501076585178
1562	YME1L1	2	1	0.016048653838144
1563	PAOX	1	4	0.0160480001413978
1564	MYL12B	1	3	0.0160462215680676
1565	RSL1D1	1	3	0.0160446546926738
1566	RBP1	2	1	0.0160441811913033
1567	MT2A	1	3	0.016042171195749
1568	COX1	1	4	0.0160418465701406
1569	UQCRB	1	3	0.0160396076311017
1570	APLP2	1	4	0.0160325808299039
1571	LIMK2	2	1	0.0160321249402143
1572	AMMECR1L	1	4	0.0160320594045177
1573	TIAL1	2	1	0.0160226509175118
1574	POLR2B	1	4	0.0160219013519985
1575	FDFT1	1	3	0.0160213787805999
1576	ZC3H13	2	1	0.0160200390199725
1577	SPARCL1	2	1	0.0160181383383228
1578	NDUFB2	1	3	0.0160178418830655
1579	NRAS	1	3	0.0160128323630685
1580	ENSMMUG00000064551	2	1	0.0160118794637985
1581	RTN4	2	1	0.0160113422946371
1582	STMN1	1	4	0.0160047746429216
1583	TPGS2	1	4	0.0160029639896639
1584	CALR	1	3	0.0160025540698162
1585	ROMO1	1	4	0.0160013231456177
1586	EIF4A2	1	4	0.0160007964731933
1587	NFIB	1	3	0.0160001550840357
1588	IDH2	1	4	0.0159980322732951
1589	NDUFAB1	1	4	0.015992729249761
1590	LENG8	1	3	0.0159909748979387
1591	PNMA1	1	4	0.0159882738601429
1592	NDUFC2	1	3	0.0159872471123012
1593	ZC3H7A	1	3	0.0159859358664667
1594	ARHGEF10L	1	3	0.0159854823891735
1595	SLC22A17	1	4	0.0159849439910183
1596	DDX42	2	1	0.0159804495291397
1597	YWHAZ	1	4	0.015978970653322
1598	LSM14A	1	3	0.0159771577329719
1599	TRIM37	1	4	0.0159771537278484
1600	FADS2	2	1	0.0159767335628729
1601	BCL9	1	3	0.015972693228858
1602	RPS3A	1	4	0.0159678596310477
1603	MRPS15	1	3	0.0159581931379088
1604	FSCN1	1	4	0.0159558381283057
1605	CRELD1	1	3	0.0159544227756387
1606	EIF5	2	1	0.0159504697567968
1607	DNMT1	2	1	0.0159466010008928
1608	SERINC1	2	1	0.0159435474555136
1609	ZNF93	1	3	0.015939393951712
1610	BZW1	1	3	0.0159385566974183
1611	TCF4	1	3	0.0159347523061836
1612	ARRDC3	1	3	0.0159304274050542
1613	HIKESHI	1	4	0.0159300006732572
1614	ENSMMUG00000060590	1	4	0.0159292545121285
1615	JTB	1	4	0.0159276398346671
1616	ENSMMUG00000008346	1	3	0.0159273002758377
1617	UBE2V1	1	4	0.0159264489618262
1618	STAMBP	2	1	0.0159252996759243
1619	FKBP8	1	3	0.0159159974161142
1620	SSU72	2	1	0.0159154631347282
1621	ENSMMUG00000022428	1	4	0.0159150424454337
1622	MRPL36	1	4	0.015910539338032
1623	CACYBP	1	3	0.0159084923341739
1624	ABI1	2	1	0.0159063355823934
1625	FNDC3B	1	4	0.0159060098000103
1626	B4GALT2	1	3	0.0159028923839268
1627	TAX1BP3	1	4	0.015902168493957
1628	ACE	1	3	0.0158825480146353
1629	CHST7	1	4	0.0158788965374023
1630	ALDOC	1	4	0.0158780407465343
1631	H2AFZ	2	1	0.0158778129064351
1632	GBA	1	3	0.0158760776540007
1633	SNRPN	1	3	0.0158699770049706
1634	PRKDC	2	1	0.0158657180519087
1635	MIB1	1	3	0.0158642872519742
1636	HEATR1	2	1	0.0158623509755912
1637	FTH1	1	4	0.0158549895553456
1638	DRG1	2	1	0.0158542235966134
1639	RPS13	1	3	0.015853641777175
1640	RNF145	2	1	0.0158476530507451
1641	ARF4	2	1	0.015847487910902
1642	CS	2	1	0.0158434461917893
1643	PSMD12	1	4	0.0158418109652067
1644	TPP1	2	1	0.0158374252356826
1645	ITM2B	2	1	0.0158334799753178
1646	SUB1	1	4	0.0158332011136813
1647	SYT11	1	4	0.0158263372184191
1648	UBAP2L	1	3	0.0158257433109791
1649	KIF5C	2	1	0.0158256356735767
1650	TWSG1	2	1	0.0158250910792517
1651	MYNN	1	4	0.0158178147297313
1652	EFCAB2	1	3	0.0158175530563551
1653	ALG8	1	3	0.0158165657767352
1654	CSNK2B	1	3	0.0158141459258508
1655	GNAZ	1	4	0.0158090257019978
1656	PSMC1	1	3	0.0158087660986272
1657	PMEPA1	1	4	0.0158081007084087
1658	ENSMMUG00000017466	1	4	0.0158075986544753
1659	MLC1	1	4	0.0158070965115788
1660	RRAGC	1	4	0.0158049266557498
1661	SRSF2	1	3	0.0158031268393779
1662	HBA	1	3	0.01580230494683
1663	MBOAT2	1	3	0.015800661539403
1664	IVD	2	1	0.0158002645602508
1665	YWHAG	1	4	0.0157999233655096
1666	SMDT1	1	3	0.0157989112616616
1667	TST	1	4	0.0157970525597269
1668	ENSMMUG00000012440	1	4	0.0157966539183044
1669	ATP9B	1	3	0.0157920274800595
1670	PTP4A2	1	4	0.015788506959027
1671	PCBD1	2	1	0.015783523920063
1672	ABCE1	2	1	0.0157815303851928
1673	ENSMMUG00000044046	1	3	0.0157814759364492
1674	DHCR24	1	3	0.0157814079348875
1675	HNRNPC	2	1	0.0157769485011532
1676	POLR2B	2	1	0.0157741962135757
1677	STK40	1	3	0.0157726844314262
1678	PDLIM5	1	4	0.0157676563472824
1679	ENSMMUG00000002320	1	4	0.0157671887083205
1680	ENSMMUG00000006803	1	3	0.0157662337245323
1681	HSPA4	1	3	0.0157652247276881
1682	ENSMMUG00000014753	2	1	0.0157612956213357
1683	ATP6V1A	1	3	0.0157586707228189
1684	HNRNPA2B1	2	1	0.0157556547798655
1685	CCT3	2	1	0.0157541654634391
1686	HSPA9	2	1	0.0157533493026774
1687	TSPYL2	1	4	0.0157531246252294
1688	PTTG1IP	1	3	0.0157506022781665
1689	RBBP6	1	3	0.0157459828058361
1690	NDUFA5	2	1	0.0157399018131264
1691	VPS35	1	4	0.0157393483269017
1692	TIA1	2	1	0.0157386073039839
1693	RB1	1	3	0.0157352823628599
1694	KLHL23	1	3	0.0157352177091852
1695	CAMK2N1	2	1	0.0157350695084699
1696	GABARAPL2	1	3	0.0157323355257635
1697	CBX2	2	1	0.0157314676381428
1698	DDAH2	1	3	0.0157302906750276
1699	ALKBH5	1	3	0.0157282607141779
1700	ENSMMUG00000001645	1	4	0.0157267307903988
1701	CTNNB1	1	3	0.0157238201064808
1702	EIF3E	1	4	0.0157220066470393
1703	PRDX1	2	1	0.0157178996329659
1704	RB1	2	1	0.0157171077766531
1705	RNF38	2	1	0.015713214615481
1706	RPL3	1	4	0.015704823387745
1707	HSD17B12	1	4	0.0157042467919398
1708	EIF4A1	1	3	0.0156979103069227
1709	SDCBP	1	3	0.015692421322722
1710	FKBP3	1	4	0.0156903970443113
1711	ST13	2	1	0.0156901564718402
1712	GNB1	1	4	0.0156901473841489
1713	INO80C	2	1	0.0156895502185931
1714	HADHA	1	4	0.0156890927376238
1715	BCLAF1	1	4	0.0156888782844034
1716	MLC1	1	3	0.0156878738440308
1717	UTP11	1	4	0.0156845889099097
1718	MAP2	1	4	0.0156837728461164
1719	ZNF335	1	3	0.0156818452051027
1720	ENSMMUG00000058919	1	3	0.0156805405355615
1721	ENSMMUG00000054358	2	1	0.0156778776455772
1722	MACIR	1	4	0.0156772405304808
1723	PLEKHA1	2	1	0.0156741557968844
1724	GPBP1	1	4	0.015672801766449
1725	LPCAT1	1	4	0.015669065484573
1726	PRPF38B	1	3	0.0156679349961599
1727	EPRS1	2	1	0.015666627022211
1728	PPM1K	2	1	0.0156661177609814
1729	H2AFY	1	4	0.0156658920145603
1730	HNRNPA0	1	4	0.0156653030380181
1731	SDC2	1	4	0.0156619671811149
1732	ENSMMUG00000007536	1	4	0.0156591842416559
1733	MAN1A2	1	3	0.0156564770280559
1734	BTN2A2	2	1	0.0156552925929894
1735	APMAP	1	4	0.0156546810829061
1736	ABCA2	1	3	0.0156537148034253
1737	LARP7	2	1	0.0156532208453956
1738	NDST3	2	1	0.0156526402927086
1739	ENSMMUG00000053770	2	1	0.0156519028575542
1740	CLNS1A	2	1	0.0156485652519588
1741	RPL23A	2	1	0.0156479934057295
1742	SLC39A10	1	4	0.0156455559232854
1743	BRD2	1	3	0.0156419066411158
1744	CRMP1	1	4	0.0156399796536877
1745	LMAN2	2	1	0.015639691556959
1746	RGCC	2	1	0.0156341987598564
1747	VCPIP1	1	4	0.015633458030397
1748	ZNF507	1	3	0.0156326138470229
1749	SLC38A2	1	3	0.0156252110343272
1750	TNC	2	1	0.0156247491765766
1751	ERG28	2	1	0.0156227295723181
1752	CANX	1	3	0.015621691326731
1753	SV2A	1	4	0.0156216001626638
1754	ZFP37	1	4	0.0156210860242066
1755	AIF1L	1	3	0.015614481415598
1756	SGPL1	1	3	0.0156125681618481
1757	LRPAP1	1	4	0.0156122783157273
1758	CSPG5	2	1	0.0156113285443594
1759	REEP2	2	1	0.015607673312279
1760	DCBLD2	1	3	0.015604372028408
1761	RBM25	2	1	0.0156013939436987
1762	ZBTB21	1	3	0.0156010619044844
1763	CTNND1	1	3	0.0155981827557322
1764	COPS8	1	3	0.0155958387772886
1765	SNRPD2	2	1	0.0155955704604345
1766	RBBP6	1	4	0.0155915412220236
1767	RNPC3	1	3	0.015591315218231
1768	KIFBP	2	1	0.0155872840668046
1769	PRPF40A	2	1	0.0155839382342162
1770	DAPK1	1	3	0.0155838274220592
1771	NCAM1	2	1	0.0155834479623666
1772	TIGAR	1	3	0.0155828365690665
1773	DECR1	1	3	0.0155824261682557
1774	ARRDC3	2	1	0.0155799737292922
1775	SOX8	1	3	0.015578684309187
1776	E2F6	2	1	0.0155767188194918
1777	UBXN4	2	1	0.0155757133169136
1778	DST	1	3	0.0155742238618567
1779	ENSMMUG00000015095	1	4	0.0155728066761512
1780	CDIPT	1	4	0.0155719741584253
1781	DCUN1D5	1	3	0.0155673564555466
1782	ARHGAP1	1	4	0.0155651089380095
1783	EI24	1	3	0.0155590681726746
1784	HNRNPD	1	4	0.0155581911079458
1785	ELOA	1	3	0.0155558456359364
1786	TSPAN3	1	3	0.0155553728614041
1787	SMARCA4	1	3	0.0155548158575035
1788	PPP6R3	1	4	0.0155538364202851
1789	PICALM	1	4	0.0155525232100667
1790	MTPAP	1	4	0.015551567208045
1791	FOXN2	1	4	0.0155477210826793
1792	TCEAL8	2	1	0.0155418485988141
1793	ND3	2	1	0.0155349676395707
1794	SNRPA1	1	3	0.0155348550642928
1795	FUNDC2	1	3	0.0155344884789848
1796	HDAC1	2	1	0.0155317098266176
1797	SMARCD1	1	4	0.0155298194953629
1798	DDX24	2	1	0.0155284699630346
1799	ENSMMUG00000031947	2	1	0.0155260455588315
1800	GATAD2B	1	3	0.0155229281644818
1801	NBEA	2	1	0.0155209870958806
1802	UBL5	1	3	0.01551871995993
1803	UPF2	1	3	0.0155180489558869
1804	CYB5R3	1	3	0.0155120446098038
1805	EIF4G1	2	1	0.015508962909681
1806	PNRC2	1	4	0.0155037173375465
1807	TAF15	1	3	0.0155021154110942
1808	EED	2	1	0.0155008394354924
1809	DAG1	1	3	0.0154989557351639
1810	BLOC1S5	2	1	0.015497816760009
1811	LDHA	2	1	0.0154953436195869
1812	HNRNPDL	2	1	0.0154939331293716
1813	HNRNPK	1	4	0.0154889560055593
1814	CDADC1	1	4	0.0154848850646121
1815	MAT2A	2	1	0.0154816100329927
1816	ENSMMUG00000008396	2	1	0.0154760185693151
1817	PHPT1	1	4	0.0154694176163842
1818	ENSMMUG00000006608	2	1	0.0154689985247282
1819	TMEM183A	2	1	0.0154642647584031
1820	ABCD4	1	3	0.0154620665401286
1821	HNRNPU	1	4	0.01545859792764
1822	TSPAN7	2	1	0.0154537745304099
1823	SCG3	2	1	0.0154535677174611
1824	SPCS2	1	3	0.0154530213258798
1825	ENAH	1	3	0.0154484145609356
1826	MSL1	2	1	0.015446962912847
1827	GDI2	2	1	0.0154443853910938
1828	SPARC	1	4	0.0154416499101239
1829	GLO1	1	3	0.0154414557748221
1830	ENSMMUG00000018157	1	4	0.0154385207454775
1831	CLASP2	1	3	0.0154369916010867
1832	POLD2	2	1	0.0154334322734098
1833	GLOD4	2	1	0.0154331287941515
1834	DCAF5	1	3	0.0154191620827949
1835	ACTL6A	1	4	0.0154175497632845
1836	EPB41L2	2	1	0.0154171378517692
1837	DELE1	1	3	0.0154169281844088
1838	ENSMMUG00000059641	2	1	0.0154159584379793
1839	WDR75	1	3	0.0154157421519015
1840	PAPOLA	2	1	0.0154153726033783
1841	MTARC2	1	3	0.0154131380977328
1842	TIAL1	1	3	0.0154117736232292
1843	PHIP	1	3	0.0154086604267513
1844	RNF220	2	1	0.0154067204230785
1845	PNMA1	2	1	0.0154052470858166
1846	HSPH1	1	4	0.0154029707416634
1847	PAIP2	2	1	0.0154005945475396
1848	RPS11	2	1	0.0153972692472818
1849	NDUFS6	2	1	0.0153964330860982
1850	YPEL5	1	3	0.0153954541276062
1851	TUBB4A	1	4	0.0153939045179664
1852	EPS8	1	4	0.0153938469291952
1853	XPO7	1	4	0.0153937938592073
1854	SLC22A17	2	1	0.0153928899773928
1855	CTNNA1	2	1	0.015392305370863
1856	INTS4	1	3	0.0153921842577368
1857	ENSMMUG00000052424	1	4	0.0153863074888206
1858	TMBIM6	1	4	0.0153859418122005
1859	ZNF606	2	1	0.0153856837444454
1860	ENSMMUG00000052013	1	4	0.0153847879498449
1861	CCDC50	1	4	0.0153836997587765
1862	EIF3F	1	4	0.0153795215387099
1863	SLC30A9	2	1	0.0153782124953113
1864	PLRG1	1	3	0.015372720495868
1865	KLHL42	2	1	0.0153727025112387
1866	CERS5	2	1	0.0153680503913131
1867	ATP6V1G1	2	1	0.015364320243008
1868	KCTD12	2	1	0.0153632837070318
1869	RNF38	1	3	0.0153618982207436
1870	ENSMMUG00000064585	1	3	0.0153605802879833
1871	ENSMMUG00000064531	2	1	0.0153598740744807
1872	PUM1	1	4	0.0153571638290527
1873	GATM	1	3	0.0153561274147989
1874	ENSMMUG00000040370	1	3	0.0153557759389669
1875	NDRG3	1	3	0.0153548672881813
1876	FARP1	2	1	0.0153469047430319
1877	ENSMMUG00000012505	1	4	0.0153414185049616
1878	EIF2S2	1	4	0.0153407063119625
1879	AMOTL2	1	3	0.0153406233798565
1880	SGCE	1	3	0.0153404385144904
1881	DAP	2	1	0.0153365550527769
1882	PRKDC	1	3	0.0153327125990828
1883	THUMPD1	1	3	0.0153314876585232
1884	RNF103	2	1	0.015330034566083
1885	ENSMMUG00000059725	1	4	0.0153245411410903
1886	MOCS2	1	3	0.0153220800370214
1887	TMEM123	2	1	0.0153209764322035
1888	RPL38	2	1	0.0153141753924186
1889	IPO9	1	3	0.0153110523930622
1890	SH3BGRL	1	3	0.0153101851626723
1891	TTC3	1	3	0.0153064353331572
1892	NSFL1C	1	3	0.0153062596922649
1893	GABRB3	1	4	0.0153059933357988
1894	LEPROTL1	1	3	0.0153058307963994
1895	USP10	1	4	0.0153035793230888
1896	PPP4R2	1	4	0.0153029344249802
1897	TSTD2	1	4	0.0153025220347965
1898	DHCR7	1	3	0.0152983640170001
1899	ZKSCAN1	1	3	0.0152951713089774
1900	BMPR2	1	4	0.0152947928832071
1901	CRISPLD1	2	1	0.0152844256409296
1902	RPS16	1	3	0.015282803509013
1903	WBP11	2	1	0.015281952464702
1904	NPM1	1	4	0.0152790163205954
1905	UBE2D2	2	1	0.0152740901287282
1906	IGF2BP2	1	3	0.0152715812269692
1907	MED10	1	4	0.015267716854893
1908	CHD2	1	3	0.0152669640792888
1909	UBE2R2	2	1	0.0152623790381218
1910	GIGYF1	2	1	0.0152537173376322
1911	NPEPPS	1	3	0.0152513804511579
1912	BPHL	1	4	0.0152458328565817
1913	CCDC50	1	3	0.0152446019487011
1914	TMBIM6	2	1	0.0152441158834338
1915	RPSA	2	1	0.0152425549378618
1916	ENSMMUG00000017966	2	1	0.0152423108081909
1917	RBFOX2	1	3	0.0152398332191717
1918	NDUFC2	2	1	0.0152384060831597
1919	QSER1	1	3	0.0152379864436214
1920	TARDBP	1	3	0.0152365055419139
1921	MAPK11	1	3	0.0152352966067863
1922	CNOT7	1	3	0.0152305370567929
1923	SERINC1	1	4	0.0152297554008415
1924	COL9A1	1	3	0.0152294760155928
1925	ATP5F1A	2	1	0.0152290058180083
1926	ZNF428	2	1	0.0152219319391974
1927	MRPS25	1	3	0.0152192184515328
1928	ARL6IP5	2	1	0.0152185929000997
1929	ATP5MPL	2	1	0.0152171089649517
1930	AQP4	1	4	0.0152165929900964
1931	SNN	1	3	0.0152146251767936
1932	HSP90B1	1	4	0.0152120761227703
1933	POLR2F	1	3	0.015209984329203
1934	TRIM9	1	4	0.0152085762957472
1935	ARRB1	1	3	0.0152079620939445
1936	KRTCAP2	1	3	0.0152077904206175
1937	DHCR24	2	1	0.0152056163976067
1938	CPNE1	2	1	0.0152029059141754
1939	TRIM28	2	1	0.0152015107437485
1940	DNER	1	3	0.0151983285408064
1941	ARPC2	2	1	0.0151953634557526
1942	PLPP5	2	1	0.0151926822962826
1943	MT1E	1	4	0.0151920534734921
1944	SLC25A3	2	1	0.0151908083427972
1945	HS2ST1	1	3	0.0151899442007015
1946	CNOT4	1	4	0.0151899293630759
1947	NMT2	1	3	0.0151861979059762
1948	TRIM72	1	4	0.015185033964707
1949	ELAVL3	1	4	0.0151847116724004
1950	HNRNPA1	1	4	0.0151835833116287
1951	SCG3	1	4	0.0151818093448808
1952	SGTA	2	1	0.0151800628365805
1953	IFT74	1	4	0.0151769150776325
1954	ZFP30	1	3	0.0151705740704073
1955	FEZ1	1	4	0.0151699194216447
1956	HTATSF1	1	4	0.0151696954107995
1957	RNF141	2	1	0.0151677427803584
1958	ATP5IF1	1	4	0.0151650848357075
1959	TGS1	1	3	0.015163045510162
1960	HMGN5	2	1	0.0151621762539231
1961	GTF2F2	2	1	0.0151619881136814
1962	CBX1	1	3	0.0151614145950608
1963	TAX1BP3	2	1	0.0151580707559032
1964	DHX9	1	3	0.0151565806913108
1965	PNPLA8	1	3	0.015155912484649
1966	KIF2A	1	4	0.015154049651272
1967	TBC1D20	2	1	0.0151538780662594
1968	C6H5orf24	2	1	0.0151527821153432
1969	ENSMMUG00000062012	1	3	0.0151514702604479
1970	ID4	1	4	0.0151488217905642
1971	DERL1	1	4	0.0151487432258363
1972	CFDP1	1	4	0.0151465096814049
1973	KIF3B	1	4	0.0151449825170994
1974	JAK1	1	3	0.015143994626317
1975	ENSMMUG00000028695	2	1	0.0151425542450594
1976	MANF	2	1	0.0151424159515256
1977	UCHL1	2	1	0.0151421750563152
1978	ENSMMUG00000061125	1	3	0.0151409022956535
1979	PCGF2	2	1	0.0151399489109017
1980	JTB	1	3	0.0151359857886889
1981	CBX1	2	1	0.0151347052247505
1982	ENSMMUG00000052127	1	4	0.0151318447733337
1983	ENSMMUG00000042951	2	1	0.0151296942404977
1984	CBX5	1	3	0.0151248980582373
1985	MSN	2	1	0.0151241911741959
1986	SPIN1	1	4	0.0151229845810397
1987	LRRN1	1	4	0.015121683769898
1988	PLEKHB2	2	1	0.0151212014732124
1989	SLC25A36	1	4	0.0151183157666044
1990	SSR2	2	1	0.0151168263953619
1991	RERE	2	1	0.0151164445873549
1992	BRWD1	1	3	0.0151119522431667
1993	ZBTB40	1	3	0.01511083421556
1994	CHL1	2	1	0.0151104589171739
1995	DNAJC25	2	1	0.0151082418171843
1996	APOO	2	1	0.015106389918783
1997	CD99L2	1	3	0.0151062608438494
1998	TRIM52	2	1	0.0151034649575383
1999	RNF144A	1	3	0.0150990566042054
[truncated: 71,000 more rows]
