# Supplementary material for: Temporal transcriptomic dynamics in developing macaque neocortex
Source: eLife. 2024 Feb 28;12:RP90325. doi: 10.7554/eLife.90325 (PMC10911584; doi:10.7554/eLife.90325)
Supplement: Supplementary file 6. [file elife-90325-supp6.xlsx]

## Sheet: human vRG
	PCW7	PCW8	PCW14	PCW16	PCW17
TMEM251	0.538199	-1.19803	-0.662601	1.35462	-0.0321794
TFPI2	1.55783	-0.840053	-0.216631	-0.840053	0.338906
KATNB1	0.650251	-0.951915	-0.0908382	1.3333	-0.940796
LOH12CR1	0.262132	-1.21546	-0.658306	1.4066	0.205034
CDC5L	-0.122236	-1.25803	-0.471263	0.442935	1.40859
MDM1	0.991796	-1.18229	-0.575002	-0.322562	1.08806
CBWD5	1.27003	-1.15028	-0.86277	0.518904	0.224117
JAGN1	0.308531	-0.819917	-0.0542381	1.52169	-0.956066
VDAC3	1.07011	-0.886418	0.6633	-1.22051	0.373521
DEDD	-0.0821922	-0.941141	-0.722676	1.60135	0.144663
ING3	0.541933	-1.36965	0.214055	1.20021	-0.586555
CTR9	0.105634	-1.57188	-0.133374	0.467517	1.13211
RFX4	1.78884	-0.449298	-0.440949	-0.449298	-0.449298
GSTZ1	0.700326	-0.727379	-0.669293	1.41823	-0.721888
GNS	-0.445991	-0.947835	-0.726253	1.31291	0.807166
NEK4	0.92426	-0.837271	-0.470075	1.22846	-0.845369
CSNK1G3	0.0264055	-0.847648	-0.161757	1.66868	-0.685677
TUBB4B	1.24201	-0.223151	0.30163	-1.51018	0.189694
COMMD5	0.352556	-1.28442	-0.0608986	1.42629	-0.433527
ITGA2	1.56058	-1.12549	-0.539294	0.0805239	0.0236779
ATP5S	0.616346	-1.52977	-0.39189	1.02307	0.282248
C19orf24	0.936537	-1.04489	0.231152	0.931105	-1.0539
FAM192A	-0.0360768	-1.45359	-0.233159	0.444664	1.27816
PBDC1	1.49298	-0.500671	0.26821	-0.0584378	-1.20208
EXOSC4	1.12944	-1.37767	-0.205443	0.810481	-0.3568
NHLH2	1.78818	-0.437926	-0.406046	-0.472103	-0.472103
ZMYM1	0.522927	-0.984268	0.828267	-1.18457	0.817641
CHEK1	1.6463	-0.868988	0.00992475	-0.72873	-0.0585032
C1D	1.63307	-0.613745	-0.381481	0.232201	-0.87004
ILVBL	1.39498	-0.771208	-0.687664	0.73349	-0.669603
CAAP1	1.09032	-0.904122	-0.316987	1.03615	-0.90536
DYNC1LI1	0.195726	-1.3078	-0.53985	1.37162	0.280302
CNBP	1.46037	-0.724776	-0.252502	-1.00364	0.520553
HBZ	0.967756	-0.475896	-0.756719	-0.923334	1.18819
ASCC2	0.187873	-0.83153	-0.141043	1.60592	-0.821218
ZNF124	1.66349	-0.631168	0.220989	-0.636404	-0.616909
LOC100419583	-0.0432693	-1.268	-0.476011	1.42587	0.361416
BCAS2	0.97381	-1.28306	-0.128013	1.02283	-0.585565
TCEAL7	0.425598	-1.58919	-0.308832	0.9749	0.497525
ELMSAN1	1.50768	-0.0726044	0.342657	-0.77923	-0.998504
CENPT	1.51527	-1.28482	-0.111953	0.0704408	-0.188943
NAA20	0.589003	-1.37095	-0.261372	1.28356	-0.240242
RNF138	-0.131627	-1.16175	-0.361557	1.58009	0.0748462
HBE1	0.652783	-0.671357	-0.69394	-0.736392	1.44891
DLG5	-0.912801	0.51147	-0.36074	1.49564	-0.733569
MAP1S	0.25369	-1.04048	-0.476872	1.58766	-0.323997
SMAD5	0.807095	-1.67899	-0.0260054	0.699741	0.198162
ACOT9	-0.0538057	-0.67869	-0.508637	1.74029	-0.499158
SNX7	0.981826	-1.18312	0.159391	-0.876261	0.91816
LIG3	1.67552	-0.776544	-0.193499	0.0366959	-0.742173
RAB5C	-0.0209038	-0.770699	-0.365668	1.7193	-0.56203
CHMP6	1.62713	-0.681432	0.310763	-0.595124	-0.661334
RPS6KA5	0.558915	-1.78187	0.391668	0.498193	0.333094
UBE2A	0.914537	-0.701695	0.107832	-1.30231	0.981636
AGFG1	0.983414	-1.29161	-0.823914	0.716015	0.416093
DDX59	-0.177479	-1.2485	-0.543531	0.689101	1.28041
PSMD5	1.53687	-0.8935	0.196023	-0.8935	0.0541077
TTC30B	0.449396	-0.702735	-0.606705	-0.702735	1.56278
ERCC6L	1.26286	-0.965648	-0.745979	0.862952	-0.414182
ZFAND1	1.10684	-1.04729	0.277725	-1.04729	0.710026
RSRC1	0.0247946	-0.856838	-0.489883	-0.376217	1.69814
RRAGD	1.75335	-0.552789	-0.0949866	-0.552789	-0.552789
ALAD	1.20111	-0.734157	-0.716005	0.983208	-0.734157
TMEM69	1.67561	-0.769042	-0.066947	-0.769042	-0.0705829
CCDC92	-0.295997	-1.3238	-0.367108	1.15359	0.83331
MRPL35	1.02257	-1.41242	-0.639302	0.617398	0.411745
KRAS	0.479834	-1.29296	0.153879	1.29322	-0.633966
IPO8	1.72642	-0.589103	0.0217981	-0.589103	-0.570012
RMND1	0.600927	-1.34534	-0.00840233	1.25547	-0.502662
APBA3	1.45023	-0.875853	-0.274874	0.560641	-0.860142
NKIRAS1	0.570078	-0.841119	-0.3499	1.46206	-0.841119
COL1A1	1.78517	-0.509429	-0.398876	-0.509429	-0.36744
CUL2	0.469471	-1.16294	-0.826661	0.217666	1.30247
HARS2	0.498683	-0.835045	-0.489062	1.52496	-0.699531
ZSCAN16	1.25621	-1.00209	0.632649	-1.00209	0.115324
C8orf4	-0.363026	-0.774225	-0.29856	-0.318645	1.75446
LOC100505715	0.588394	-1.03706	0.296149	1.18958	-1.03706
PRR34-AS1	0.862788	-1.07755	0.424437	0.867878	-1.07755
OLA1	1.61628	-0.868955	-0.186273	0.188776	-0.749824
MRPL11	1.70263	-0.939489	-0.378709	-0.215504	-0.168931
ATP5E	1.72223	-0.682026	-0.333412	-0.0310432	-0.675749
DIAPH3	0.0779112	-1.03745	-0.965945	1.2185	0.70699
ZNF627	1.68036	-0.604511	-0.323904	-0.836038	0.0840888
C7orf60	0.517756	-0.611454	-0.738158	1.5266	-0.694743
PSRC1	1.62431	-0.448924	-0.0912197	-0.0110299	-1.07314
PSMA7	1.52726	-0.420557	0.2869	-1.16437	-0.229234
TIMM17B	-0.95014	1.58507	-0.130714	0.21724	-0.721458
EIF3K	-1.40997	1.0414	0.884369	-0.17934	-0.336463
ATP1A1	1.15223	-0.824927	-0.336886	0.973897	-0.964313
SERTAD2	1.56363	-0.788638	0.192989	-0.94625	-0.0217322
TMEM106C	-0.7084	-1.09797	-0.285107	0.935717	1.15576
NDRG3	0.983517	-0.742531	-0.538307	1.18485	-0.887527
NINJ1	0.521687	-1.28645	-0.852346	0.669166	0.947947
USP47	-0.0941258	-0.830093	0.728127	-1.07513	1.27122
NEIL3	0.0826592	-0.642057	-0.37715	1.69304	-0.756497
UBL7	1.53307	-0.349757	0.360048	-1.0932	-0.450156
RPUSD3	0.376647	-1.05898	-0.406322	1.53907	-0.450416
RBM5	0.168393	-0.646902	0.0419828	1.53282	-1.09629
DRAP1	-1.30228	0.987073	-0.202199	1.01864	-0.501244
CEP112	0.725812	-0.914782	-1.25751	0.789927	0.656551
CCDC12	1.57822	-0.491699	-0.319216	0.276339	-1.04364
HJURP	1.55593	-0.842337	-0.546246	0.444125	-0.611477
SNRPB2	1.75306	-0.543524	-0.0957103	-0.587641	-0.526187
CEP78	1.03505	-0.96758	-0.912743	1.05593	-0.210655
GRSF1	0.488743	-0.94554	-0.215789	1.47523	-0.80264
SPAST	-0.492404	1.78611	-0.4388	-0.359077	-0.495833
TCF7L2	1.64737	-0.335882	0.195302	-0.753396	-0.753396
DCLRE1C	1.35017	-1.40341	-0.170781	-0.164793	0.388812
ASXL1	-1.04624	1.14282	0.481121	0.486072	-1.06377
IFT74	0.623058	-1.37983	-0.750949	0.693251	0.814467
CENPM	0.00579473	-1.56987	-0.0834593	0.531064	1.11647
ZC3HC1	1.21366	-0.815145	-0.0793232	-1.10969	0.790498
KAT7	-0.0334638	-0.657389	-0.316904	1.72012	-0.712367
TTC3	-0.949144	1.127	0.355125	-1.14991	0.616931
FBXO5	1.59087	-0.849193	0.280576	-0.240209	-0.782042
STOX1	1.73281	-0.615529	-0.346053	-0.702907	-0.0683197
DCN	-0.34794	-0.96931	-0.640099	0.424579	1.53277
HS6ST1	-1.46549	0.0741195	-0.119207	1.34338	0.167195
TYW5	0.431555	-0.79752	-0.354892	-0.821087	1.54194
SCG5	-1.27615	0.0646072	-0.513308	1.4175	0.307348
KIAA0232	-0.517054	1.77876	-0.262614	-0.517054	-0.482037
NUP205	1.50746	-0.823807	-0.134465	0.388733	-0.937925
AP2B1	-1.75814	0.601453	0.141459	0.430658	0.58457
DNAJB9	1.52404	-0.870137	-0.104939	0.341341	-0.890304
CCDC186	-0.927159	1.14709	-0.287317	0.96636	-0.898975
KRT19	-0.475867	1.78774	-0.464187	-0.386536	-0.46115
ZMYM5	1.67302	-0.393992	-0.310074	-0.974474	0.00552055
PRPSAP1	1.08918	-1.16851	-0.448065	1.00815	-0.480759
PNMA1	0.20441	-1.19503	-0.369308	1.537	-0.177069
MRPL30	0.32956	-0.598482	-0.328373	1.57281	-0.975518
EIF2S2	1.08806	-1.20504	-0.637817	-0.202398	0.957192
PPHLN1	1.49438	-0.715141	-0.357668	0.509839	-0.931413
PMF1	1.59523	-0.809705	-0.588266	0.367258	-0.564518
ZC3H15	1.45116	-0.254607	0.444818	-1.19777	-0.443606
2022-09-11	0.619203	-1.08772	-0.541585	-0.397722	1.40782
FAM216A	1.32789	-0.666613	-0.395551	0.761729	-1.02745
MAEA	-0.275444	-0.79612	-0.429298	1.74535	-0.24449
GGPS1	0.0919637	-0.867426	-0.477824	1.6815	-0.428211
RARS	1.76689	-0.343589	-0.398607	-0.317204	-0.70749
FHL1	0.176712	-1.63769	0.146074	0.20972	1.10518
MRPS18A	1.58944	-0.863567	-0.786208	0.26255	-0.202212
GSTO1	0.149476	-1.40929	0.353072	-0.399801	1.30654
DDX24	-0.0191446	-1.2677	-0.678715	0.972254	0.993302
EMC4	0.948447	-0.833722	-0.847266	1.20864	-0.476104
C2orf68	1.13458	-0.840022	-0.483912	1.03143	-0.842071
TRAPPC2L	-0.679603	1.55054	0.475477	-0.70034	-0.646074
ARMCX6	-0.476543	-1.10641	-0.344182	1.49901	0.428125
GALNT7	1.3142	-0.523824	-0.709001	-0.904542	0.823164
LYPLA2	0.45054	-0.965021	0.580018	1.09133	-1.15686
THAP3	1.54713	-0.864635	-0.108368	0.296993	-0.871119
NUP85	0.827315	-1.40656	-0.526662	1.02637	0.079543
CDK7	-0.234599	-0.869682	-0.277034	1.72937	-0.348057
CENPO	1.49111	-0.838229	-0.365397	0.526747	-0.814234
POLR2K	1.46045	-0.920591	-0.0265077	-0.922679	0.409323
WBP11	1.42195	-0.613256	-0.353772	-1.05612	0.6012
EIF4H	1.03451	-0.928122	-0.443436	1.12114	-0.784089
CHCHD2	0.971024	-1.12252	0.932789	-0.948209	0.166918
KIF5B	1.71033	-0.869504	-0.318469	-0.0600693	-0.462287
HDAC1	1.63146	0.0629252	-0.72423	-0.89695	-0.0732031
KAT6A	0.179782	-1.26524	-0.455643	1.46759	0.0735134
AAR2	1.297	-0.767752	0.0618111	0.584768	-1.17583
COG4	-0.854035	1.12778	-0.331595	1.00029	-0.942442
KLHDC8A	1.7316	-0.327707	-0.28952	-0.249407	-0.864961
TP53BP2	1.6553	-0.0364526	-0.0329747	-0.79968	-0.786188
CENPA	0.796405	-1.54567	0.12435	-0.306375	0.931293
OAT	-0.327566	-0.976963	-0.365101	-0.00515758	1.67479
MCM5	0.949964	-1.17978	-0.862667	0.119201	0.973283
GPAA1	0.248198	-1.15688	-0.625201	1.48554	0.0483465
CRNKL1	1.47171	-0.889204	-0.895555	0.466656	-0.153609
WNK2	-0.735331	1.60652	-0.435566	-0.762689	0.327066
PDLIM1	1.74217	-0.414005	-0.419803	-0.774049	-0.134317
WASH3P	-0.606532	1.75191	-0.155226	-0.651018	-0.339135
HNRNPD	-0.77297	1.62784	-0.00941903	0.0217685	-0.867224
SYF2	1.68819	-0.878277	-0.52565	0.0338664	-0.318126
TRMT1L	1.53343	-0.623206	0.506552	-0.708386	-0.708386
ZIC3	1.78868	-0.445815	-0.424685	-0.459089	-0.459089
ADGRL2	0.715697	-1.24988	-0.907413	0.898409	0.543183
SCMH1	-0.0870139	-0.754539	-0.447114	1.73815	-0.449481
SGMS1	1.76561	-0.53855	-0.498983	-0.165845	-0.562231
RAB11FIP2	1.12583	-0.946244	-0.0820811	-1.00417	0.906664
SEC31A	0.113345	-0.890137	-0.61365	1.6574	-0.266959
PIM1	1.60078	-0.739131	-0.105929	0.167305	-0.923025
TMA16	0.117208	-1.32035	-0.32686	1.45986	0.0701454
AMD1	-0.231793	-1.0235	-0.687897	0.453178	1.49001
CDC25C	1.7256	-0.861949	-0.407613	-0.160107	-0.295928
DDIT4	1.7177	0.0403526	-0.582035	-0.494142	-0.681872
CNOT4	1.15509	-1.49429	0.158041	0.533005	-0.351847
HAUS5	1.25175	-0.961318	-0.385946	-0.775492	0.871009
BBS4	1.47431	-0.782528	0.347664	-1.04554	0.00609935
SYNRG	0.493591	-0.979645	-0.237595	-0.751364	1.47501
CEP95	-0.266617	-1.15402	-0.657566	1.0906	0.987597
ZNF250	1.61956	-0.493091	0.29726	-0.838409	-0.585319
E4F1	0.696134	-1.37329	0.556318	-0.749727	0.870567
LINC01159	0.400676	-1.32321	-0.151394	-0.325872	1.3998
TRUB2	1.67901	0.0448993	-0.286757	-0.897404	-0.539753
ZFX	-0.670534	-0.10508	-0.126795	-0.797014	1.69942
NEK3	1.23001	-0.546373	-1.15965	0.842357	-0.366337
TMEM246	0.632051	-0.676302	0.0291267	1.26099	-1.24587
ITM2B	0.759713	-0.360741	-1.15628	-0.534844	1.29215
NDUFV1	1.19154	-1.26415	-0.365521	0.832489	-0.394358
TUBA1A	-0.0457494	0.632441	0.977774	-1.62429	0.0598204
ENO1	1.64281	-0.15255	-0.476004	-1.02528	0.0110247
C1orf61	1.47773	0.140209	-0.403106	-1.27684	0.0620037
NSUN6	0.944429	-1.02963	-0.488197	1.19367	-0.620267
AHCY	-0.143559	-0.847656	-0.338857	1.7284	-0.398331
CNDP2	0.706973	-1.1177	-0.252796	1.32345	-0.659926
ORMDL1	0.775131	-1.3536	-0.164604	1.16645	-0.423374
DMTF1	-0.127877	-0.638787	-0.259947	1.73418	-0.707568
RWDD4	0.666097	-0.382508	-0.848103	1.40729	-0.842773
COL3A1	1.785	-0.494567	-0.460709	-0.494567	-0.335157
TMEM185B	1.75804	-0.617393	-0.332483	-0.190774	-0.617393
WDR76	1.06073	-0.8361	-0.497314	-0.8361	1.10879
FANCB	1.57922	-0.702856	-0.588247	0.414736	-0.702856
GLMP	1.46988	-0.815152	-0.41861	-0.815152	0.579038
PRMT6	-0.217032	-0.751523	0.0402863	1.67979	-0.751523
PGM2	0.553321	-0.824304	-0.537984	-0.690441	1.49941
LMBR1	0.996753	-0.866446	-0.417448	-0.866446	1.15359
FAM114A1	1.29841	-1.14701	-0.180986	0.709522	-0.679942
DR1	-0.543375	-0.893103	-0.0213694	1.68913	-0.231283
MGMT	1.66262	-0.662891	-0.555793	-0.662891	0.218957
SLC2A12	0.851266	-0.807623	-0.534253	1.29823	-0.807623
PWP2	1.7728	-0.568545	-0.252204	-0.383509	-0.568545
TLE6	1.06712	-0.73066	-0.729137	1.12333	-0.73066
ZDHHC2	1.77486	-0.53539	-0.232213	-0.53539	-0.471867
CFAP97	-0.394862	-1.24409	-0.35416	0.692706	1.30041
FBXO8	0.429703	-0.727789	-0.549305	1.56932	-0.721928
MAP2K5	0.656586	-0.966794	-0.0449599	1.31097	-0.955798
TIPIN	1.40828	-0.896226	-0.548796	0.693522	-0.656784
GORASP1	-0.0397119	-0.640319	-0.413778	1.73413	-0.640319
ZNF454	1.74623	-0.56184	-0.0607107	-0.56184	-0.56184
ANKRD13B	1.60057	-0.669667	0.372944	-0.669667	-0.63418
SLC26A11	1.54	-0.774478	-0.458518	-0.774478	0.467474
ASPSCR1	-0.486891	-1.12246	-0.343114	1.46574	0.486721
IRF2BPL	1.7095	-0.597426	0.0827765	-0.597426	-0.597426
EFCAB11	-0.157586	-1.47638	0.158727	1.32162	0.153615
FBXO4	1.75332	-0.552837	-0.0948076	-0.552837	-0.552837
CAPN15	1.75774	-0.592526	-0.434996	-0.137691	-0.592526
C6orf136	0.734998	-1.23505	0.526017	0.897347	-0.923312
ETF1	-0.43098	-0.978981	-0.535789	0.391579	1.55417
LRRTM4	1.76756	-0.595609	-0.279056	-0.595609	-0.29728
C8orf76	1.42674	-0.903628	0.550063	-0.903628	-0.169551
CCDC84	1.60043	-0.678219	0.372425	-0.678219	-0.616415
MTFR2	1.71137	-0.601531	0.0762534	-0.601531	-0.584563
RIC8A	-0.135005	-0.782347	-0.301462	1.73548	-0.516664
ZNF16	1.78722	-0.471487	-0.372758	-0.471487	-0.471487
ZNF680	1.72805	-0.581258	0.0157194	-0.581258	-0.581258
CXorf40B	0.784972	-0.988802	-0.00250551	1.19514	-0.988802
LOC388780	1.62751	-0.672761	-0.591688	0.309704	-0.672761
PET117	1.29321	-0.766731	0.869452	-0.766731	-0.629205
PMS2P5	1.00096	-0.750421	-0.717596	1.18509	-0.718032
OFD1	0.923319	-1.12166	-1.04859	0.702142	0.544796
ZNF300	1.55048	-0.359164	0.316323	-1.09329	-0.414342
SNHG8	-1.00854	-0.132912	0.160241	1.59923	-0.618024
WDR82	-0.746184	1.65855	-0.27095	-0.775299	0.133885
RNF182	0.282576	-0.692475	-0.443112	1.6266	-0.773592
GLIDR	1.24344	-0.693677	0.305004	0.442769	-1.29754
LRRC37BP1	1.44115	-1.04893	-0.336235	0.567077	-0.623061
SNHG15	1.69479	-0.974538	-0.257396	-0.183446	-0.279407
MPC2	0.58849	-1.75665	0.425784	0.13561	0.606768
ADK	0.0830553	-1.02056	-0.940122	1.32932	0.548307
TRIM44	-0.721622	0.217364	-0.426263	-0.721622	1.65214
CNR1	-0.851886	-0.67877	0.416197	1.56205	-0.447592
GNA12	-0.981462	1.17889	-0.0417637	0.825801	-0.981462
IPO7	-0.992257	0.176421	0.476774	-0.992257	1.33132
CORO2B	-0.944911	1.51495	-0.531716	-0.533265	0.494936
NACAD	-0.628638	1.66272	0.2232	-0.628638	-0.628638
KRT7	-0.449777	1.78884	-0.449777	-0.449777	-0.439505
DTNB	-0.755103	0.287247	-0.395823	1.61878	-0.755103
EIF3M	0.15379	-0.539237	-0.580613	1.68341	-0.71735
VOPP1	1.20609	-0.0190925	-0.392629	-1.41584	0.621476
CDC27	0.711161	-0.700787	-0.330362	1.35222	-1.03223
CRIPT	0.721503	-0.680912	-0.346681	1.34652	-1.04043
TMEM161B-AS1	0.353816	-1.33214	0.175039	-0.532954	1.33624
CAMK2N1	-0.865286	-0.511216	0.279634	1.62319	-0.526317
DDHD2	0.950319	-1.09295	-0.254392	1.13628	-0.739257
HOOK3	-0.0258017	-1.13136	-0.699352	0.424804	1.43171
CHD3	-1.10851	0.709913	-0.244926	1.32181	-0.678287
SMARCB1	-0.216243	-0.698947	-0.314244	1.75713	-0.527695
CLK1	0.580204	-1.74246	0.0860317	0.680714	0.395509
FAM83D	1.09459	-0.452208	-0.271413	0.922418	-1.29339
FBXO42	-0.146403	-1.01182	-0.752597	1.48587	0.424945
PTPRO	1.70296	-0.714666	-0.293794	0.0144889	-0.708987
NDN	1.39689	-0.770182	0.724058	-0.577939	-0.772822
CIB1	0.222938	-0.983253	0.239902	-0.92101	1.44142
FBXL12	1.55113	-1.08728	-0.0159152	-0.61845	0.170515
SDK2	1.78626	-0.460569	-0.355364	-0.491466	-0.478865
FLYWCH1	1.28927	-0.919452	-0.206857	0.765961	-0.928924
MRPL49	1.3609	-0.681985	-0.535268	0.76065	-0.904296
WDR83	1.53105	-0.698243	0.510361	-0.725545	-0.617624
ZNF764	1.77562	-0.282766	-0.371064	-0.573381	-0.548412
ZNF85	1.43115	-0.774716	0.66015	-0.815055	-0.501524
HEY1	1.71069	-0.213867	-0.876203	-0.126631	-0.493991
DNAJC9	0.947502	-0.75846	-1.32081	0.299433	0.832334
MRPS6	-0.0230836	-0.878468	-0.265316	-0.529351	1.69622
RPS9	0.284245	-1.12699	0.437788	-0.887354	1.29231
LDHA	1.69359	0.0171174	-0.304953	-0.86158	-0.544178
RPS7	1.36027	-0.210723	0.622814	-1.15703	-0.615331
MATR3	0.443422	-1.65375	-0.194598	0.554602	0.850321
C11orf31	0.428937	-1.39967	-0.523314	0.263813	1.23024
HN1	1.09648	0.0815449	0.736664	-1.41309	-0.501595
GIN1	1.13499	-0.630271	-0.628624	1.03963	-0.915726
HS6ST2	1.75994	-0.139355	-0.489607	-0.609766	-0.521212
POLR3E	1.72225	-0.242766	-0.0887674	-0.695357	-0.695357
SLC35F1	1.67457	-0.630676	-0.361519	0.124938	-0.807313
CKLF	-0.157195	-0.662497	-0.382832	1.75599	-0.553466
UBXN2A	1.22732	-0.739184	0.835456	-1.09385	-0.229741
NUBPL	0.0545379	-1.10621	-0.557903	1.56856	0.0410136
RGMB	1.5846	-0.592005	-0.432273	0.350217	-0.910535
ASUN	1.63758	-0.291285	0.198532	-0.792933	-0.751891
TMEM60	1.57029	-0.792796	-0.802925	0.373731	-0.348296
MAP4	-0.897706	0.341692	-0.281017	1.56919	-0.732156
NSRP1	0.875836	-1.21807	-0.595314	-0.222361	1.15991
SREK1IP1	1.64418	-0.350544	0.0052419	-0.24309	-1.05578
TXN2	1.27795	-0.639771	0.577793	-1.27297	0.0569985
MRPL28	0.202829	-1.577	-0.289053	0.882615	0.780612
PTBP1	1.65911	-0.715499	-0.637282	0.222595	-0.528919
SUGP1	0.365097	-0.52866	-0.612556	1.59446	-0.818344
IVD	1.58845	-1.13127	-0.106655	0.0740016	-0.424525
NRAS	0.474026	-0.868854	-0.517439	1.537	-0.62473
ZDHHC13	1.6018	0.0747312	-0.333144	-1.12739	-0.215992
HSPA4	1.67535	-0.725224	-0.810727	-0.0810342	-0.0583655
KIAA1715	0.30494	-0.889744	-0.302343	-0.703257	1.5904
TMEM70	1.35709	-0.626275	-0.102764	0.568676	-1.19672
SOX3	0.00265572	-1.00691	-0.670794	0.0847722	1.59028
USO1	1.63915	-0.257483	-0.248177	-1.08776	-0.0457286
MCM2	0.899558	-0.679742	-0.244098	-1.14304	1.16732
TMEM161B	0.242334	-1.1213	-0.539807	-0.123117	1.54189
NUBP1	-0.211378	-0.748524	-0.53842	1.74481	-0.246493
KIAA1279	0.204754	-1.22081	-0.296752	1.52758	-0.21478
IDH3G	0.916675	-1.57794	0.445929	0.580841	-0.365508
PSPC1	0.801892	-1.4329	-0.647755	0.456951	0.821812
RBBP7	0.831938	-0.603808	-0.337305	1.24277	-1.1336
PHACTR4	0.806249	-0.837085	-1.1339	1.16769	-0.00295679
TRAPPC4	1.34962	-0.179064	0.629274	-1.15564	-0.644188
NUP62	0.758751	-1.42506	-0.204193	1.13272	-0.262218
KLHL12	0.613603	-1.27385	-0.891267	0.813344	0.738174
PDRG1	1.0689	-0.775297	-0.893189	1.09943	-0.499841
KCTD6	1.21044	-0.817196	-0.442813	0.93849	-0.888921
HERPUD2	1.64211	-0.74794	0.176125	-0.270317	-0.799979
HDAC5	0.932757	-0.863247	0.971223	0.150428	-1.19116
RASA1	-1.18754	-0.104224	-0.589895	1.42072	0.460939
EGR1	-0.447192	-0.91992	-0.44489	0.159623	1.65238
TRIM36	-0.285794	-0.851172	0.922564	-0.969767	1.18417
POLR2I	1.64232	-0.870615	-0.443318	-0.547828	0.219436
SNHG5	1.29048	-0.595434	-0.064084	0.627108	-1.25807
HNRNPDL	1.3853	-0.637151	-0.112379	-1.17236	0.536585
HSPB1	0.167266	-0.889064	0.225292	-0.978036	1.47454
TALDO1	1.77158	-0.507447	-0.637549	-0.288612	-0.337974
RPL36A	-1.07007	0.990323	-0.269113	1.10742	-0.758554
GPKOW	0.454212	-0.756717	-0.266316	1.50678	-0.937958
CTTNBP2NL	0.506907	-0.862277	-0.129274	1.43927	-0.954627
METTL14	0.157024	-1.2157	-0.817669	1.12321	0.753135
COX19	1.52034	-0.54165	-0.00926899	0.195433	-1.16486
AP3M2	1.16714	-0.521237	-0.713554	0.996802	-0.929151
TMUB2	-0.475202	-1.01189	-0.493845	1.51216	0.468775
SYNGR2	1.45419	-0.648165	-0.65512	-0.791217	0.640309
PIGH	1.14231	-1.01988	-0.239368	0.950328	-0.833398
PTGR2	0.625827	-0.934807	-0.493655	1.44263	-0.639996
MIEF1	-0.180174	-0.904579	-0.383165	1.71505	-0.247129
YDJC	1.35389	-0.740573	0.789341	-0.777966	-0.624693
ERLIN1	-0.114702	-0.861886	-0.73246	1.64417	0.06488
GPATCH2	0.633694	-0.645364	1.45576	-0.622032	-0.822057
CCDC22	1.36753	-0.605293	-0.424805	0.704808	-1.04224
PRPF38A	0.234548	-0.686101	-0.302659	1.62174	-0.867529
DNAJC30	1.12326	-1.04933	-1.02954	0.723427	0.232176
RFC3	0.656086	-1.19086	-0.676269	1.29861	-0.0875698
EIF4G1	1.01584	-1.47857	0.807821	-0.35934	0.0142533
FEN1	-0.0915549	-1.21762	-0.452776	0.267886	1.49407
KIAA0141	1.77388	-0.390189	-0.44509	-0.646068	-0.292537
TP53BP1	1.29862	0.391861	-0.575711	-1.33431	0.21954
SFRP2	1.00368	-0.981154	1.13759	-0.757437	-0.402676
SMEK2	0.592123	-0.821883	-0.0289555	1.34171	-1.08299
MRPL3	1.47051	-1.00171	-0.137394	0.45089	-0.782297
ABRACL	-0.734587	1.15207	-0.211311	0.91358	-1.11975
PIK3R3	-0.216269	0.468916	-0.265105	1.35956	-1.3471
SF3B4	0.638035	-1.08288	-0.0612115	1.32272	-0.816662
EBLN3	0.597871	-0.412716	-0.705028	1.45158	-0.931705
ARL14EP	1.51687	-0.971973	-0.840262	0.196178	0.0991821
COQ3	-0.0784946	-0.648668	-0.466151	1.74639	-0.553077
GTF3C2	-0.815458	-0.0829423	-0.407789	1.72752	-0.421333
CDKN1C	-0.352119	1.78401	-0.403128	-0.485945	-0.542821
SKP2	1.11973	-0.714031	-0.777063	1.06987	-0.698507
USP7	-0.548345	0.0102498	-0.337897	-0.827183	1.70318
MTCH2	0.861747	-1.17814	0.820624	0.478922	-0.983155
ACAT1	0.792156	-0.881446	-0.492976	1.33588	-0.753616
OIP5	0.596052	-1.02268	0.0618417	1.30678	-0.941997
DUT	0.048357	-1.19846	-0.0545273	-0.354982	1.55961
NEUROG2	1.63644	-0.260065	-0.322807	0.0187631	-1.07233
RAD51C	1.35476	0.500212	-0.921378	0.0943043	-1.0279
TGIF1	1.03603	-1.19778	-0.613151	1.02612	-0.251217
PPAP2B	-0.146722	-0.721914	-0.182131	-0.672967	1.72373
TCTEX1D2	-1.09306	0.350977	-0.893201	1.34068	0.294609
LHX2	1.71536	-0.760367	-0.610511	-0.018397	-0.326082
RSF1	1.05057	-1.47887	0.753286	-0.373441	0.0484566
ARPC3	0.544912	-1.21664	0.902151	0.716182	-0.946603
MED13L	1.73887	-0.647834	-0.126553	-0.287943	-0.676541
MTERF2	0.862177	-1.65946	0.0329725	0.705933	0.0583807
PDZD8	1.77324	-0.56696	-0.318335	-0.305002	-0.582941
DYNLRB1	1.19537	-1.06708	0.380218	0.506857	-1.01537
EIF4A2	0.561453	-1.11383	0.014487	1.34116	-0.803272
MRPS21	1.216	-1.1553	0.405369	-0.908936	0.442876
AURKAIP1	1.28876	-1.00291	-0.620161	0.835279	-0.500968
UBB	0.539766	-0.075171	0.801168	-1.69591	0.430145
KPNA2	1.48565	0.273828	0.0756942	-1.03636	-0.798809
SON	1.4673	0.190023	-0.514245	-1.23981	0.0967303
NDUFB10	0.9432	-0.30692	0.485144	0.476596	-1.59802
PRDX5	0.328367	-1.51925	1.0253	0.592258	-0.426681
NEUROD6	-0.625227	1.28331	0.359987	0.301631	-1.31971
SPAG16	1.64339	0.113884	-0.212696	-0.927525	-0.617054
TOR1AIP2	0.606683	-0.747577	1.4663	-0.812193	-0.513209
NDC1	-0.0922773	-0.776187	-0.567236	-0.291269	1.72697
IFNGR1	0.398715	-1.05555	-0.170554	1.49893	-0.671539
BORA	0.0346663	-0.533302	-0.511962	1.71807	-0.707473
ZNF830	1.70015	-0.178197	-0.0559995	-0.739512	-0.726443
KLHL24	-0.781631	-0.10003	0.0542549	1.64533	-0.817923
DPP9	0.243282	-1.42938	-0.510927	0.534912	1.16211
CCDC152	-0.682898	0.242219	-0.515842	1.65117	-0.694646
EMC3-AS1	1.46009	-0.76299	0.425624	-1.04849	-0.074233
UG0898H09	-0.928545	1.28031	0.488311	-1.09357	0.253489
CHID1	1.18824	-1.52911	-0.124202	0.483875	-0.0188018
CCNC	0.33209	-1.30886	-0.742211	1.13179	0.587186
LRPAP1	1.03023	-1.43918	0.444168	-0.596184	0.560965
RAD1	-0.996863	0.423973	-0.597685	1.52979	-0.359213
C10orf32	1.66465	-0.502697	-0.0214168	-0.166935	-0.973604
SAT1	-1.45507	-0.246479	-0.0831576	0.558794	1.22591
SMARCAL1	0.0387221	-0.874769	-0.563243	1.68378	-0.284487
ANGPTL1	-0.0620844	-1.09547	-0.85913	0.89774	1.11895
NSDHL	0.967906	-0.598981	-0.305293	1.11036	-1.174
HSPB11	-0.42689	-0.810933	-0.0605605	-0.426352	1.72473
RPAP2	1.71637	0.0499892	-0.599132	-0.659138	-0.508089
KANSL1L	-0.540061	1.76825	-0.18096	-0.540061	-0.507166
RRP15	-1.03662	1.51759	0.420527	-0.590648	-0.310857
CACFD1	-0.736399	-0.226669	-0.0197841	1.70034	-0.717489
ARL5A	1.11617	-1.3076	0.76808	0.0912386	-0.667883
RBM45	-0.692992	1.4857	0.593274	-0.692992	-0.692992
SLC1A2	-1.10791	-0.0746119	-0.289039	-0.158831	1.6304
LAS1L	-0.939272	0.0770213	-0.371107	1.66871	-0.43535
MTOR	-0.727653	-0.0428102	-0.56089	1.73053	-0.39918
ACAP3	-1.03966	0.297309	1.26793	0.473735	-0.999322
SMO	-0.68431	1.66416	-0.602631	-0.593565	0.216346
GSTK1	-0.869179	0.440045	-0.418252	-0.698118	1.5455
MCEE	-0.629029	1.75214	-0.338129	-0.155951	-0.629029
SEZ6L2	-0.701385	1.48397	0.596049	-0.701385	-0.677252
PPIL4	1.07527	-0.853476	-0.177925	0.998548	-1.04241
SMPD3	-0.667847	0.0159101	-0.417165	1.7195	-0.650399
FBXO16	0.83021	-0.680978	1.32614	-0.737688	-0.737688
CRTAP	-0.876175	-0.17404	0.374056	1.52836	-0.852196
PATZ1	-0.751881	1.66483	0.125281	-0.751881	-0.286349
USP34	1.03889	-0.739093	0.295735	-1.32482	0.729282
SUPT6H	-0.764538	0.549324	-0.522362	-0.764538	1.50211
CACNB1	-0.647772	-0.0709148	-0.370847	1.7373	-0.647772
SEMA4D	-0.670816	1.75191	-0.263234	-0.212593	-0.605263
NAA35	-0.129732	-0.69376	0.111846	1.62786	-0.916211
DHFR	0.878296	-1.40591	-0.43122	-0.0712198	1.03005
HPCAL1	-0.564455	-1.08691	-0.166534	1.54923	0.268672
TRAPPC12	-0.546554	1.75781	-0.118144	-0.546554	-0.546554
CEP128	-0.758647	-0.489904	-0.212636	1.74836	-0.287173
PARN	1.31275	-0.800743	0.574424	0.0548588	-1.14129
BFAR	-1.169	0.396701	0.122923	1.38537	-0.735995
PGGT1B	1.7269	-0.0722195	-0.412418	-0.432827	-0.809433
STX5	-0.334829	-0.904869	-0.597708	1.63418	0.203225
LGALS3	-0.871741	-0.180161	-0.466836	-0.198855	1.71759
GH1	-0.447214	1.78885	-0.447214	-0.447214	-0.447214
HIST1H1B	-0.572794	1.75574	-0.498805	-0.111342	-0.572794
LOC652276	-0.915569	0.286977	-0.330086	1.59981	-0.641128
PLEKHA5	1.38595	-0.724015	-1.17358	0.102906	0.408733
LSM14A	1.76077	-0.553941	-0.311882	-0.66555	-0.229394
GTPBP4	0.452705	-0.498286	-0.541658	1.53478	-0.947539
SCARNA22	1.76394	-0.53442	-0.28664	-0.276198	-0.666683
SNHG9	0.117103	-0.952828	-0.737168	1.59205	-0.0191557
MRPL36	-1.23556	1.10792	-0.0967663	0.890456	-0.666048
WDR34	0.239356	-0.512693	-0.0790158	-1.16761	1.51996
GLA	0.619199	-0.701209	-0.706588	1.4701	-0.6815
SSBP3	-0.69072	0.03757	-0.257093	1.68823	-0.77799
LETM1	-0.647783	0.264469	-0.600309	1.64643	-0.662811
CEBPZOS	-1.34866	1.21212	-0.481354	0.689258	-0.0713649
BET1	-1.26763	1.04955	-0.408008	0.994621	-0.368537
LOC150776	-0.235886	-0.709537	-0.366419	1.76186	-0.450014
CREBZF	1.48864	-0.946238	-0.0776099	0.389915	-0.854708
CAMTA1	0.916277	-0.740623	-0.916365	-0.495052	1.23576
CDK5RAP3	0.159745	-1.49732	-0.380872	1.09473	0.623718
MRPL43	1.12364	-1.41171	-0.196835	0.784753	-0.299849
PSMB2	1.03682	-1.30603	-0.320029	-0.392132	0.981374
CALB2	-0.381864	1.78069	-0.367528	-0.424869	-0.606424
PSMD1	0.43534	-0.987868	-0.688674	1.51224	-0.271036
COX5A	1.16331	-1.3085	0.416546	-0.737421	0.466064
ENY2	1.2388	-1.31237	-0.215086	-0.428008	0.716665
VPS28	0.843093	-0.334371	0.673933	-1.59728	0.414622
HSPD1	0.18874	-0.638408	-0.586949	-0.638198	1.67482
CACYBP	1.07619	-1.25644	-0.833732	0.671296	0.342686
RAN	1.21308	0.535239	-0.0451098	-1.47988	-0.223321
COPE	1.31717	-0.863146	0.739704	-0.236038	-0.957689
RBMX	1.46538	-0.330369	0.440627	-1.18027	-0.395369
COX4I1	0.295971	-1.20804	0.94607	-0.899439	0.865443
CFL1	0.0787196	0.946254	0.76212	-1.57205	-0.215046
SERINC2	1.11255	-0.525025	-0.635376	1.04416	-0.996303
PPIH	1.4157	-0.801807	-0.108591	0.526275	-1.03158
SGPL1	0.505517	-0.643185	-0.472511	1.51367	-0.903493
MIS18A	1.71856	-0.710231	-0.276417	-0.680504	-0.0514042
ZBED5	1.3001	-0.78393	0.341071	-1.2069	0.349665
TRAF2	1.66143	0.0900473	-0.210553	-0.770461	-0.770461
GLE1	-0.270998	-0.86059	-0.68812	1.63675	0.182954
S1PR1	0.612649	-0.877072	0.56027	-1.26545	0.969606
NECAP2	0.240116	-0.562689	-0.460732	1.63798	-0.854675
FGFR1OP2	-0.061427	-0.69224	-0.535005	1.73989	-0.451215
PKNOX1	0.326214	-0.690563	0.00517455	1.47423	-1.11505
ADSS	-1.1749	-0.0836208	-0.397061	1.56416	0.0914236
FGD5-AS1	0.661617	-1.34857	-0.609944	1.16354	0.133358
COG1	-0.0966249	-0.571935	-0.473532	1.75154	-0.609449
PIGQ	0.698925	-0.940749	-0.0869179	1.29683	-0.968083
DNAJC4	0.644538	-0.916194	-0.941737	-0.142346	1.35574
IER2	0.703422	-0.908027	-0.765762	-0.415784	1.38615
RPS19BP1	0.895364	-1.53459	-0.32394	0.111061	0.852105
MPHOSPH8	-1.38399	1.02387	-0.475583	-0.0621842	0.897889
RNASEH2C	0.00389148	-1.39921	-0.483104	0.789954	1.08847
STMN2	-0.735018	0.277091	1.43411	0.163766	-1.13995
WDR12	-0.972266	1.20645	0.081361	-1.03606	0.720508
SHROOM3	-0.131854	-0.668101	-0.157798	-0.756581	1.71433
AP3D1	-1.41501	0.755262	-0.655582	0.400285	0.915045
LRRC3B	-0.211776	-0.714215	-0.421167	-0.412756	1.75991
GK5	-0.810044	0.315071	-0.264444	1.58101	-0.821598
QRICH1	-1.18555	-0.0397961	-0.367392	1.56757	0.0251705
SEZ6	-0.906422	-0.0535248	0.356448	1.49891	-0.895408
MBTD1	-0.798722	1.09985	-0.590015	1.0832	-0.794313
DDX42	-1.14879	0.957938	-0.22928	-0.690437	1.11057
MYC	0.571865	-0.45256	-0.406876	1.42075	-1.13318
NRXN1	0.636598	-1.69451	0.0559666	0.83134	0.170609
LIPG	-0.749208	1.44151	0.652385	-0.796938	-0.547748
GOLGA2P7	-0.759184	1.62164	-0.381295	0.275555	-0.756714
AK2	1.59671	-0.407978	-0.77586	0.339851	-0.752728
C16orf87	0.273213	-1.30047	-0.32593	1.45516	-0.10197
PNMA2	-1.60302	0.824414	-0.0171999	0.863582	-0.0677748
CDV3	-0.0251244	-0.62467	-0.338772	1.7202	-0.731637
CREBBP	-0.627505	1.53754	0.482466	-0.555037	-0.837469
TMEM256	-1.39258	-0.233395	0.214043	1.40011	0.0118263
UBXN2B	1.2623	-0.0761964	0.727115	-1.10136	-0.811851
C2orf69	0.383751	-0.705263	-0.151187	1.50536	-1.03266
PBX1	-0.370977	-1.12536	0.682721	1.35519	-0.541571
ZDHHC9	1.69339	-0.613466	-0.0268739	-0.843468	-0.209583
SF3A3	0.470564	-1.72428	0.427874	0.787988	0.037852
SPEN	0.471441	-0.834282	-0.732782	1.53385	-0.438229
FRYL	-0.37975	-1.46641	0.176642	1.20931	0.460214
TULP3	1.27474	-0.793781	0.830695	-0.967811	-0.343846
PAGR1	0.857407	-0.71083	-0.256215	1.21411	-1.10447
EXOC5	0.038554	-1.02135	-0.0906716	1.62553	-0.552066
ELP6	-0.540578	1.65996	0.190017	-0.483009	-0.826386
MCM10	-0.658449	0.251863	-0.25738	1.60012	-0.936153
MSH3	-1.60956	0.083407	-0.13506	0.784161	0.87705
RNASEH1-AS1	0.479697	1.53939	-0.507299	-0.76093	-0.750861
RAE1	1.13996	-1.15879	-0.492297	0.957246	-0.446123
PABPC4	-0.911252	0.577316	-0.129338	1.39617	-0.932899
ECHS1	1.16132	-0.818323	0.6102	0.283354	-1.23655
RNF167	0.510827	-0.723563	-0.756339	1.52711	-0.558034
TMEM18	0.621458	-0.64246	-0.548119	1.45474	-0.885621
NEUROD2	-1.07269	0.984491	0.434287	0.730178	-1.07626
SS18L2	1.17681	-0.528149	-0.167299	0.806294	-1.28766
GAREML	-1.04368	1.10715	-0.768414	1.00286	-0.297927
HNRNPU	-0.737837	1.7487	-0.506143	-0.168388	-0.336329
ORC4	1.20678	-0.36947	-0.826586	0.923048	-0.933768
UBA1	0.74818	-0.0182878	-0.365172	-1.45516	1.09044
CHMP5	1.14836	-1.22309	-0.81311	0.188948	0.698894
LSM3	1.48695	-0.302614	0.254735	-0.173173	-1.2659
C19orf53	1.77288	-0.4642	-0.303954	-0.353546	-0.651179
FKBP3	1.69345	-0.750905	0.0766397	-0.362786	-0.656404
CYC1	1.06879	-1.45022	0.791789	-0.352546	-0.0578119
LINC00504	-0.870353	0.00634015	-0.192896	1.67883	-0.621917
DBI	-1.06721	-0.0496329	0.412738	-0.752562	1.45667
GPM6A	-1.32219	0.518456	1.35216	-0.320529	-0.227906
DNAJB1	1.62587	-0.38555	-1.00423	-0.41092	0.174833
G3BP1	1.31335	-1.24561	-0.650652	0.546744	0.0361685
PSMB3	-0.917293	1.6342	0.0761979	-0.107014	-0.686088
SMARCE1	1.18101	-0.890531	-1.06119	-0.0557023	0.826407
GMNN	0.893914	-0.627803	-1.02385	-0.478863	1.23661
RPL30	1.04256	-0.439972	1.07643	-1.11451	-0.56451
RPL3	0.743741	-0.402862	0.612513	-1.5846	0.631208
HMGN1	0.792182	-0.530289	-0.0935552	-1.32278	1.15444
RPS26	-0.364785	1.54389	-0.452015	-1.07582	0.348727
OXR1	-0.0786458	-0.81437	-0.493904	1.72421	-0.337292
PDCL3	0.28475	-0.716224	-0.103223	1.54256	-1.00786
MBD4	1.32063	-0.889687	-0.833245	0.78816	-0.385862
TFG	-0.017212	-1.00837	-0.792697	1.50136	0.316921
KHSRP	-0.974378	0.698618	-0.775078	1.36496	-0.314117
FMNL2	-0.348036	1.78499	-0.476902	-0.433048	-0.527
ZC3H6	1.5463	-0.111113	0.293899	-0.95215	-0.776939
SLC35E2B	-0.041566	-0.780894	0.025277	1.63756	-0.840378
SAAL1	0.511518	-0.570295	-0.935343	1.50803	-0.513907
MICAL1	-0.0303592	-0.87259	0.236979	1.54949	-0.883516
GPC6	0.0571395	-0.718026	-0.205582	1.67088	-0.80441
TTC1	-0.0432431	-0.64042	-0.143436	-0.856367	1.68347
ALG3	0.963649	-0.590404	-0.572434	-0.990195	1.18938
FAT4	0.387444	-0.660251	-0.466784	-0.839041	1.57863
WASL	0.515469	-0.734324	-0.445936	-0.845575	1.51037
TRMT11	1.29472	-0.694082	-0.423372	-0.9961	0.818831
PRMT7	0.266659	-0.678685	-0.504513	1.64016	-0.723619
DHRS1	-0.19594	-0.973535	-0.55451	1.64311	0.0808739
GPX8	-0.0256783	-1.12326	-0.784924	0.612249	1.32162
FRMD6	0.506149	-0.819653	-0.18139	-0.960158	1.45505
NCALD	1.74264	-0.488112	-0.46607	-0.080477	-0.707985
PMM1	-0.127806	-0.67626	-0.45166	1.75346	-0.49773
SLC11A2	0.287265	-0.827187	-0.226179	1.58485	-0.818746
CHAF1A	0.0306637	-0.65547	-0.428961	1.71646	-0.662696
AP4B1	-0.0682921	-0.842454	-0.665936	1.68254	-0.105856
SMIM11	0.52646	-1.44822	-0.268084	-0.0553719	1.24522
NARF	1.30838	-0.709276	-0.288657	0.754046	-1.0645
SURF2	-0.530644	1.71062	-0.62542	0.0743579	-0.62891
TRO	1.43647	-0.290937	0.589028	-0.884755	-0.849805
WASF1	1.12888	-0.246439	0.969536	-0.996723	-0.85525
TSNAX	1.66163	0.022313	-0.119235	-0.789776	-0.774933
ZSWIM7	1.55344	-0.621709	-0.0368771	-1.07932	0.184467
NET1	0.799449	-0.542764	-0.668718	1.33168	-0.919643
DAAM1	-1.50891	0.476848	-0.49743	0.963109	0.566383
YIPF4	1.15516	-0.339806	0.206638	-1.50729	0.485301
METTL10	0.325755	-0.965328	-0.175273	-0.732603	1.54745
IGFBPL1	-1.70829	0.353822	0.0868809	0.903635	0.363949
ARHGEF39	0.867453	-0.763688	-0.698317	1.29725	-0.702702
YEATS4	-0.823917	0.186095	0.567746	-1.18187	1.25195
TIMM23	1.54191	-0.159623	-0.236833	0.0924499	-1.2379
NAT9	-0.676852	1.63433	-0.507703	0.281046	-0.730818
YY1	0.0945093	-0.316098	-0.599629	-0.853194	1.67441
HSD17B4	1.45507	-1.07031	-0.712663	0.460243	-0.132337
DNER	1.03586	-0.204438	0.490525	0.279983	-1.60193
ARL4D	1.64293	0.158721	-0.305372	-0.570803	-0.925479
ZNF281	1.26489	-0.931166	0.728646	-0.99902	-0.0633515
PTPN1	0.889277	-0.881084	-0.266164	1.20805	-0.950079
RNF216	0.183068	-0.89804	0.119251	1.51613	-0.920406
MKRN2	-0.748781	0.618001	-0.437877	1.44708	-0.878423
MRPL46	-0.124811	-1.10228	-0.701315	1.42148	0.506925
NRBF2	0.779837	-0.493746	-0.54305	1.31595	-1.05899
ADGRL1	-0.704436	1.39988	0.728308	-0.720139	-0.703613
JMJD6	-0.808894	-0.40357	-0.0739448	1.72716	-0.440753
CRAMP1L	-0.980683	-0.0664931	-0.913415	1.35282	0.607767
LOC101926898	-0.730191	0.4737	-0.541127	1.54587	-0.748255
PEX19	4.32e-05	-0.611064	-0.608688	1.73063	-0.510917
ARL6IP6	-0.00988976	-1.45592	0.0747665	1.36898	0.0220628
PARD6B	1.72458	-0.604842	-0.00450451	-0.419641	-0.695597
BCOR	0.391558	-0.486992	-1.10894	1.51172	-0.307348
PLRG1	-0.205608	-1.00052	-0.194564	1.68469	-0.283995
PIAS1	0.476299	-0.794028	-0.844943	1.51751	-0.354834
RASSF1	1.66198	-0.96168	-0.463795	0.0687248	-0.305229
GPATCH8	1.44115	0.0930039	-0.651426	0.30041	-1.18314
NOL12	1.4419	-1.37136	-0.0222436	0.114821	-0.163119
C22orf39	1.14761	-1.00637	-1.09984	0.455966	0.50264
IFT57	0.742786	-1.43527	-0.560869	1.0063	0.247053
GPR108	0.973319	-0.664282	-0.34414	1.13387	-1.09877
EIF2AK2	-0.208875	-0.952181	-0.856023	1.38447	0.632612
HIST2H2BE	-0.969871	1.30527	-0.567291	-0.593602	0.825497
ANKRD44	-0.144238	-1.11361	-0.773197	1.21385	0.817192
GLB1L	1.77663	-0.53199	-0.515659	-0.244187	-0.484798
DUSP28	1.78125	-0.520882	-0.444286	-0.295196	-0.520882
YOD1	1.73609	-0.57563	-0.0164767	-0.57563	-0.568351
C1orf53	1.57038	-0.66909	0.436895	-0.66909	-0.66909
TSC1	0.732883	-0.860982	1.35801	-0.860982	-0.368931
ZDHHC12	1.76359	-0.537586	-0.150833	-0.537586	-0.537586
NR4A2	0.11738	-1.25738	-0.68942	1.27285	0.556576
STK39	-0.43547	-1.16056	-0.0904863	0.124533	1.56198
TRAF6	1.66721	-0.707394	-0.432591	-0.707394	0.180169
RPUSD2	0.966356	-0.818887	-0.577625	1.2074	-0.777245
UBOX5	1.78345	-0.490698	-0.311358	-0.490698	-0.490698
HDX	1.78609	-0.497492	-0.364192	-0.497492	-0.426912
NSMAF	0.744387	-1.45393	-0.546514	0.977644	0.278412
POLR1E	-0.15535	-0.858211	-0.79302	1.60279	0.203795
ANKS6	1.58521	-0.663837	0.406305	-0.663837	-0.663837
SEMA3C	0.314491	-1.08551	0.250486	1.38378	-0.863242
AGBL5	0.251983	-0.800953	-0.39869	1.63292	-0.685263
BCL7B	0.652774	-0.717645	1.44901	-0.717645	-0.666497
RADIL	1.77907	-0.505064	-0.26388	-0.505064	-0.505064
BRCA2	-0.0504426	-1.19573	-0.0719886	-0.261179	1.57934
VGLL4	0.148268	-0.904465	0.136429	-0.904465	1.52423
YBX3	1.5397	-0.678844	0.496834	-0.678844	-0.678844
DERA	1.36667	-0.714188	0.77589	-0.714188	-0.714188
TRPM4	1.77007	-0.525976	-0.192139	-0.525976	-0.525976
KDM8	1.76996	-0.526178	-0.191429	-0.526178	-0.526178
FADD	-0.414255	-1.4636	1.20726	0.379761	0.290827
ASCC3	0.673206	-0.89431	-0.683717	-0.514592	1.41941
CEP85L	-0.192637	-0.990928	-0.577405	1.62111	0.13986
METTL25	1.17881	-0.728965	1.00808	-0.728965	-0.728965
ABHD13	-0.485211	-0.867022	-0.227762	1.71541	-0.135415
WDR17	1.39598	-0.710017	0.73407	-0.710017	-0.710017
GAB1	0.390133	-0.763113	-0.441351	1.57744	-0.763113
DDX28	1.52373	-0.903214	0.0834949	0.199203	-0.903214
KBTBD7	-0.0839379	-0.744131	-0.186826	1.70939	-0.694492
S1PR2	1.72949	-0.614313	0.00323059	-0.614313	-0.504091
EPOR	0.242069	-0.852457	-0.110623	1.57347	-0.852457
PIH1D2	1.74216	-0.566597	-0.0423664	-0.566597	-0.566597
C11orf1	1.0873	-0.765562	-0.65761	1.10143	-0.765562
PLEKHO2	0.4923	-0.775021	-0.49889	1.53156	-0.749947
CCPG1	1.13218	-0.777105	-0.631993	-0.777105	1.05403
NCK1	-0.36592	-0.945443	0.458141	1.52168	-0.668458
C3orf62	1.78474	-0.513075	-0.3951	-0.363486	-0.513075
RANBP17	0.901717	-0.731945	-0.708207	-0.731945	1.27038
ADPRM	0.138944	-0.905479	0.149314	1.5227	-0.905479
TSEN54	1.49972	-0.886748	-0.128356	-0.886748	0.40213
TRIM65	1.76136	-0.541178	-0.137826	-0.541178	-0.541178
LRRC45	1.7858	-0.480171	-0.345287	-0.480171	-0.480171
NEDD9	0.590684	-0.911036	-0.223201	1.41711	-0.873554
MAST4	0.759319	-1.32471	-0.825036	0.798253	0.592178
SMC6	-0.210969	-0.676016	-0.179379	1.73687	-0.67051
ST3GAL1	0.149062	-0.794386	-0.196468	1.63618	-0.794386
RECQL4	1.64256	-0.794716	0.110257	-0.163383	-0.794716
PRICKLE1	1.74633	-0.644587	-0.142441	-0.644587	-0.314719
GNB1L	1.69955	-0.754831	-0.00717851	-0.24268	-0.694857
CADM2	-0.266014	-0.836003	-0.658635	1.66982	0.0908361
C21orf91	0.433158	-1.05556	0.374353	1.24814	-1.00009
RWDD2B	1.78156	-0.497466	-0.289164	-0.497466	-0.497466
TBP	0.0126836	-1.01769	-0.546992	1.63057	-0.0785731
ZNF414	1.53482	-0.825912	0.42811	-0.825912	-0.311107
EXOC6	1.56133	-0.784598	-0.428231	0.418435	-0.766935
CTXN2	1.71028	-0.620919	-0.545784	0.0773407	-0.620919
C1R	1.78707	-0.472553	-0.369411	-0.472553	-0.472553
SCARNA1	1.78884	-0.449353	-0.440783	-0.449353	-0.449353
SNORA12	1.75423	-0.63425	-0.251719	-0.234014	-0.63425
SRSF8	1.77842	-0.512238	-0.258193	-0.512238	-0.495754
ZNF256	1.75751	-0.546983	-0.116563	-0.546983	-0.546983
BIVM	0.138229	-0.809269	-0.14737	1.62768	-0.809269
C9orf156	1.08956	-0.876642	-0.394634	1.05836	-0.876642
DFNB31	1.75496	-0.550601	-0.103156	-0.550601	-0.550601
FAM69B	1.69917	-0.73543	-0.59886	-0.453334	0.0884554
FRG1B	-0.438921	-0.987924	-0.659667	0.712022	1.37449
HDHD1	-0.106823	-0.959542	-0.671444	1.61289	0.124916
HIST1H1A	1.26304	-0.95052	-0.124979	-0.95052	0.762978
LINC00669	0.467404	-0.801568	-0.394311	-0.801568	1.53004
LINC01252	1.78392	-0.48883	-0.31743	-0.48883	-0.48883
LINC01560	1.60982	-0.770893	0.315248	-0.420929	-0.733244
LINC01563	-0.0881079	-0.807661	0.06534	1.63809	-0.807661
LOC100288911	1.38382	-0.816326	-0.476127	0.724958	-0.816326
LOC101928812	1.59523	-0.66941	0.384696	-0.66941	-0.641109
LOC101929767	1.78885	-0.447214	-0.447214	-0.447214	-0.447214
RGMB-AS1	1.78884	-0.44984	-0.439315	-0.44984	-0.44984
ZFPM2-AS1	1.78885	-0.447618	-0.445999	-0.447618	-0.447618
ZNF439	0.397972	-0.978451	0.182911	-0.978451	1.37602
SCRN3	-0.0202749	-0.687422	-0.29427	1.7131	-0.711138
TCP11L1	0.769888	-0.931265	-0.133991	1.26089	-0.965519
ZC4H2	1.52331	-0.68105	0.526314	-0.717256	-0.651322
LRRCC1	-0.578587	-0.941104	-0.650945	1.08565	1.08499
RWDD3	1.53893	-0.682909	0.497644	-0.704017	-0.649648
MAPK10	0.794153	-0.789435	-0.532327	-0.814053	1.34166
PEX3	1.34921	-1.44216	0.27458	-0.15377	-0.0278571
FRS2	0.00389942	-0.774045	-0.114441	-0.781736	1.66632
RFT1	1.71888	-0.493565	0.039811	-0.632562	-0.632562
APH1B	1.48659	-1.0981	-0.701437	0.303524	0.00942657
TEX264	0.0107879	-1.10775	-0.618095	1.53577	0.179284
MTRR	0.487216	-1.03435	0.394862	1.1998	-1.04753
ADAM17	-0.0516015	-0.726413	-0.426306	1.73413	-0.529814
PHF1	1.17078	-1.09347	-0.734065	0.911076	-0.254326
LONP1	0.13453	-0.939399	0.322331	1.44108	-0.958546
GEMIN6	1.02962	-1.1447	-0.496369	-0.467659	1.07911
ANKHD1	1.18828	-1.48284	0.373417	-0.390588	0.311735
FBXO38	0.848769	-0.820877	-0.477348	1.29171	-0.84225
PRMT9	1.67241	-0.613331	0.196521	-0.627799	-0.627799
C16orf58	1.51496	-0.768758	-0.25761	0.436955	-0.925542
FAM73A	0.157668	-1.07847	-0.312561	-0.371696	1.60505
ASCL1	1.39242	-0.406879	0.0259178	0.325963	-1.33742
ISYNA1	1.2622	-1.19088	-0.68154	0.716198	-0.105983
PPP1R10	0.90441	-0.940397	-1.02568	1.11483	-0.0531698
AAMP	0.401037	-1.5521	-0.0845891	0.043544	1.1921
PCSK1N	-1.04004	-0.469178	-0.0804957	1.63987	-0.0501549
PDHA1	0.206356	-1.34928	-0.611574	0.542794	1.2117
CFAP20	0.970854	-1.05627	-1.0973	0.729675	0.45304
IAH1	1.3164	-0.534517	-0.301221	0.701771	-1.18244
RDH11	1.35987	-0.820272	-0.0983927	0.607316	-1.04852
DUSP1	0.0383275	-0.749453	-0.61169	-0.38448	1.7073
NDUFS3	0.959837	-0.976924	-0.633385	1.1946	-0.544132
SUMO3	0.819465	-0.60893	-0.643431	1.32324	-0.890345
CWC15	1.69252	-0.39367	-0.846203	0.0581965	-0.510841
EMX2	1.74656	-0.629007	-0.344147	-0.647814	-0.125594
PRDX3	1.43916	-1.20333	-0.217151	-0.474896	0.456211
HNRNPL	1.69061	-0.744482	0.0897463	-0.37128	-0.664593
MRFAP1	0.986467	-1.03232	-0.00803229	-0.962926	1.01681
GDI1	-1.62909	0.897321	-0.119883	0.712069	0.139579
RPS4X	0.503743	-0.661344	1.07642	-1.38895	0.470127
ATP6V0B	-1.12466	-0.218716	-0.566863	1.47543	0.434807
RPL5	1.28693	-0.0501995	0.261851	-1.50753	0.00894105
CD24	-0.669209	0.413804	0.787811	0.878033	-1.41044
NDUFB7	-1.27564	1.28786	0.642797	-0.535418	-0.119604
RPS24	0.577084	-0.224065	0.780278	-1.65425	0.520953
DLGAP5	0.817726	-0.824806	-1.03931	-0.192136	1.23852
SRSF1	0.491583	-0.661134	-0.294729	1.48246	-1.01818
ABCC9	-0.797446	0.647776	-0.299994	1.39815	-0.948491
FAM60A	1.63612	0.259417	-0.802217	-0.46132	-0.632005
SPDL1	0.0942891	-1.07366	-0.913056	1.27336	0.619067
KIF18B	-1.28299	0.961867	0.916461	0.156002	-0.751339
MPC1	-0.0545626	-0.837866	0.254986	1.54893	-0.911485
GPSM1	-0.958365	1.11816	-0.154462	0.947963	-0.953294
GDAP1L1	-0.811772	-0.237759	0.144557	1.64708	-0.742108
CELF5	-1.02066	0.191138	1.24724	0.590784	-1.00851
TMEM59L	-0.731769	-0.344598	-0.435385	1.75925	-0.247496
HERPUD1	0.157784	-0.963959	-0.676966	1.60405	-0.120912
CLK3	0.258171	-0.594784	-0.322116	1.60586	-0.947126
HMP19	-1.02555	0.374353	0.352401	1.29815	-0.999361
DNAJC1	-0.485743	1.30445	0.400003	0.152161	-1.37087
COQ4	-0.218864	-0.641902	-0.363825	-0.540501	1.76509
MRTO4	0.803276	-0.777381	0.683088	0.653598	-1.36258
PRKAR1B	-1.07105	1.47458	0.445839	-0.180796	-0.668573
PRIM1	0.343742	-1.6554	-0.0123143	0.298052	1.02592
ATM	-0.102435	-0.594279	-0.162182	1.70247	-0.843577
ACACA	0.0816838	-0.805601	-0.168045	1.65393	-0.761972
MOCS2	0.169559	-1.17166	-0.674813	1.44553	0.231391
CENPQ	0.705388	-1.70963	0.240189	0.0428905	0.721159
CCNY	1.30036	-0.263898	-0.274753	0.587086	-1.3488
FOXN4	-1.43832	-0.224588	-0.22783	0.801459	1.08928
ANKRD32	-0.0587058	-0.823296	-1.08509	1.30495	0.662133
ZNF667-AS1	-0.671872	1.70569	0.000896199	-0.74527	-0.289445
PDHB	1.14933	-0.949811	0.119328	0.765736	-1.08458
BIRC2	0.0319032	-1.02424	-0.947828	0.679032	1.26113
ATAD2	1.35595	-0.578639	-0.529807	-0.994169	0.746665
CAPZA1	1.23821	-1.20316	-0.711734	0.714988	-0.0383069
ANKRD36	-0.465578	-0.993223	-0.682261	0.930545	1.21052
ORC2	-0.962714	0.00841851	0.514879	1.38407	-0.944651
AIDA	-1.12776	1.20424	-0.686037	0.862247	-0.252683
OPTN	-0.69341	-0.26505	-0.124331	1.73455	-0.651763
SCN3A	-1.07199	0.342576	0.621738	1.13576	-1.02808
ITGA6	-0.942582	1.37578	0.571361	-0.0619822	-0.942582
SESTD1	-0.898842	-0.103414	-0.324793	1.71123	-0.38418
SYNDIG1	-0.585404	1.74437	-0.0551605	-0.585404	-0.518401
B4GALT5	-0.820843	1.61989	-0.16416	0.169227	-0.804111
DNAJC5	-0.667552	1.75684	-0.403964	-0.155767	-0.529559
CASK	-1.10563	0.700423	0.636622	0.847342	-1.07875
BRCC3	-0.922704	0.7753	-0.250866	1.29579	-0.897515
PHF8	-0.811281	1.46814	0.596896	-0.478297	-0.775459
DCLK1	-1.3384	-0.136289	-0.0641896	0.0616631	1.47722
APH1A	-1.13454	0.403977	-0.771763	1.39362	0.108702
ZNHIT6	-0.685972	1.51415	0.543771	-0.685972	-0.685972
TRMT10B	-0.735879	1.68567	-0.269114	-0.735879	0.0551977
CCDC171	-0.716059	0.320758	-0.50594	-0.716059	1.6173
HECTD3	-0.700335	1.45143	0.649581	-0.700335	-0.700335
TMEM234	-0.65877	1.66533	0.212273	-0.560061	-0.65877
FAM126A	-0.862962	0.0463316	-0.0074651	1.61901	-0.794917
PAXIP1	-0.684299	0.0354864	-0.375946	-0.684299	1.70906
FNDC4	-0.892797	1.2506	-0.342361	0.864512	-0.879955
TMEM248	-0.868717	1.30026	-0.374889	0.812066	-0.868717
ALKBH4	-0.884499	-0.369117	-0.823849	1.38856	0.688906
PODXL	-0.738421	0.970193	-0.71921	1.21258	-0.725146
PARVA	-0.841807	1.52535	-0.269803	-0.841807	0.428067
SEPHS2	-0.781717	1.43592	-0.584311	0.666197	-0.736085
SRCAP	-0.919731	1.47767	0.352974	0.00881241	-0.919731
MIDN	-1.03429	0.742086	0.199559	1.12693	-1.03429
MKNK2	-0.990491	0.159137	-0.827035	1.51275	0.145642
POLR3B	-0.690385	1.4967	0.57446	-0.690385	-0.690385
PGPEP1	-0.667352	1.74122	-0.132465	-0.294468	-0.646937
CBLN1	-0.44972	1.78884	-0.439678	-0.44972	-0.44972
PXK	-0.896036	1.59533	-0.226078	0.257851	-0.731064
PINX1	-0.930897	0.47467	-0.395204	1.51875	-0.667323
NICN1	-0.899242	-0.0285136	0.279553	1.52874	-0.88054
SLC22A23	-0.687299	0.0433675	-0.396547	1.70919	-0.668708
FUT8	-1.09144	1.2061	-0.652768	0.894825	-0.356716
CCDC88C	-0.726579	1.60735	-0.507849	0.343187	-0.716111
WDR20	-0.524283	1.77487	-0.228363	-0.524283	-0.497939
KIF26A	-0.74461	0.697662	-0.626743	1.4183	-0.74461
STK3	-1.46048	-0.0612398	-0.115283	1.32351	0.313487
KHDRBS3	-1.06908	1.02343	0.162143	0.884251	-1.00074
LMF2	-1.12859	-0.524749	-0.0807391	1.55293	0.181143
IFNAR2	-0.685026	1.54676	-0.659935	-0.685026	0.48323
CYSTM1	-0.726301	0.728489	1.39939	-0.726301	-0.675274
SAC3D1	-1.0469	0.0317832	-0.615984	0.0431187	1.58798
TMEM132A	-0.788015	1.47698	-0.514191	0.590078	-0.764848
GNG8	-0.781837	1.63894	-0.24799	0.172723	-0.781837
APOM	-1.51939	1.12971	-0.312728	0.163142	0.539256
PNPLA4	-0.660402	1.69705	-0.485583	-0.660402	0.109332
RPS4Y1	-0.543117	1.76011	-0.543117	-0.130755	-0.543117
ZNF773	-0.505566	1.78104	-0.28413	-0.505566	-0.485776
COL4A3BP	-1.1071	0.356192	-0.902749	1.30913	0.344527
FAM65A	-0.819891	0.206741	-0.411302	1.65045	-0.626
FRMD6-AS1	-0.470108	1.7874	-0.37708	-0.470108	-0.470108
LOC439994	-0.913427	0.67622	-0.203158	1.35379	-0.913427
2022-03-08	-0.811692	1.30379	-0.522613	-0.811692	0.842205
RPS2P32	-0.605234	1.69927	0.116432	-0.605234	-0.605234
SMCR5	-0.666346	1.57826	0.420782	-0.666346	-0.666346
ZCCHC6	-0.778332	0.188473	-0.269032	-0.778332	1.63722
AKT3	-0.879608	0.246102	-0.550762	1.63164	-0.44737
PDK1	1.64195	-0.587352	-0.64049	0.274112	-0.688221
NDUFAF1	0.907802	-1.18622	-0.462365	-0.429794	1.17058
RBL1	0.761901	-0.813007	-0.70124	1.37211	-0.619763
MTG2	0.849973	-1.08329	-0.552722	-0.469993	1.25604
WDR3	1.62628	-0.21528	-0.645617	-0.930027	0.164648
YIPF1	0.999718	-0.732208	0.0422362	-1.25366	0.943917
UBE3B	1.67308	-0.510246	0.183713	-0.680628	-0.665919
TACC2	-0.182333	-0.803778	0.400064	1.5155	-0.929457
ZNF740	1.78163	-0.448032	-0.297909	-0.517843	-0.517843
AKAP8	0.190958	-1.04655	-0.809216	1.4757	0.189109
SRBD1	0.377246	-1.08581	-1.02839	0.631201	1.10576
STARD4	1.72433	-0.502363	-0.173932	-0.21185	-0.836181
HELLS	0.240873	-1.17139	-0.573118	0.00652838	1.49711
ZNF595	1.34334	-0.860512	0.0428174	-1.07368	0.548031
USP1	0.60138	-0.335702	-0.33235	-1.27299	1.33966
PDLIM7	1.01607	-1.33251	-0.287602	-0.378742	0.982784
RFC4	1.1417	-1.17944	-0.199334	-0.668104	0.905174
METTL5	0.234697	-1.02802	-0.837922	1.46965	0.161598
MED4	1.66148	-0.531912	-0.498651	0.188954	-0.819873
TNFAIP8L1	0.084333	-0.659643	-0.538941	1.70746	-0.593205
BRAP	-0.170982	-0.814112	-0.738662	1.66085	0.0629116
POM121C	-1.20712	0.249076	-0.554913	0.03941	1.47355
NFKBIA	0.331174	-1.44299	-0.162338	1.3335	-0.0593423
SEL1L	-1.16454	-0.414586	-0.216804	0.260679	1.53525
BLOC1S2	-1.56894	0.33567	-0.21357	1.13175	0.315084
WAPAL	0.959573	-0.616425	-0.367634	-1.11996	1.14445
NCAPH	0.0868429	-1.14684	-0.186337	1.58904	-0.342708
MKKS	1.44143	-1.12461	-0.204697	0.495909	-0.608036
ENO2	0.174869	-1.05288	0.335483	1.41169	-0.869165
FANCI	-0.056642	-0.487726	-0.523991	1.74117	-0.672811
ZNF827	1.33521	-0.134575	-0.42966	-1.31212	0.541146
TPM1	-0.941469	0.981561	0.860273	-1.15898	0.258612
RAB33A	-0.614209	0.642582	-0.320762	1.38397	-1.09159
TOX3	0.917501	-0.590596	-0.514009	-1.03065	1.21776
CCDC66	0.598218	-0.827303	-0.527199	1.47217	-0.715883
CHMP7	-0.105233	-0.783332	-0.312166	1.73107	-0.53034
SLU7	0.26236	-0.567667	-0.458213	1.62825	-0.864731
DLEU2	1.4552	-0.866225	-0.600869	0.626815	-0.614916
CDK16	0.720011	-0.912325	0.0523436	1.21818	-1.07821
TECR	0.714086	-1.70316	-0.0868553	0.49952	0.576413
LMAN2	0.291921	-0.209183	-0.451307	1.52582	-1.15725
UPF3B	-0.491166	1.52066	-0.123936	-1.16726	0.261697
GPM6B	-0.499434	-0.706838	-0.0802999	-0.456001	1.74257
PLD3	1.06638	-0.403338	-0.0427486	0.809213	-1.42951
NOSIP	1.51463	-0.848452	-0.822961	0.463396	-0.306616
STRAP	1.10363	-0.115775	0.128796	0.473311	-1.58996
ATP5I	1.27738	-0.768258	0.0178948	-1.16874	0.641725
KNSTRN	1.21819	-0.320187	0.659887	-0.160676	-1.39722
SLC25A5	-0.726909	1.70937	-0.503912	-0.540282	0.0617279
CCNA2	1.36327	-0.705355	-0.385137	0.717549	-0.99033
TIMM13	1.71324	-0.0717699	-0.578266	-0.248717	-0.814491
RPL15	0.824721	-0.424684	1.0484	-1.42826	-0.0201727
RNF26	0.896263	-0.0890028	-0.263412	0.946994	-1.49084
SOD1	0.297664	-1.204	0.137327	-0.651652	1.42066
ATP5A1	1.21151	-0.471637	-0.0683293	-1.35549	0.683942
RC3H2	1.78827	-0.437685	-0.434317	-0.425545	-0.490722
POLR1B	0.659741	-0.86632	-0.732073	1.42791	-0.489258
TMEM67	1.70776	-0.688723	-0.0907341	-0.755796	-0.172506
LIMCH1	-0.314469	-0.859621	1.64385	0.183186	-0.652951
COMMD8	-0.0549526	-1.01936	-0.693543	1.56003	0.207831
HELQ	1.54446	-0.697677	0.285384	-0.115782	-1.01639
GPR19	0.904797	-0.689936	-0.316233	1.1909	-1.08953
TMTC1	1.78756	-0.411646	-0.406117	-0.484898	-0.484898
SERTAD1	0.550005	-0.961381	-0.422579	-0.642958	1.47691
ARID5B	1.71071	-0.559559	-0.000231451	-0.354041	-0.79688
GUCD1	-0.0710856	-0.633653	-0.394598	1.73993	-0.640595
NUDT15	0.213765	-1.07471	-0.280237	1.58785	-0.44666
CSNK1G1	1.64167	-0.794645	-0.487497	0.251035	-0.610563
ZNF35	1.5222	-0.774038	-0.468505	-0.78216	0.502506
CXCL14	-0.125999	-0.648812	-0.31346	-0.654352	1.74262
E2F6	1.73847	-0.64017	-0.199678	-0.200063	-0.698564
GALC	1.73353	-0.39767	-0.486248	-0.77076	-0.078854
TECPR2	1.58257	-0.783281	-0.31897	0.33641	-0.816725
CHRAC1	-0.28654	-1.01343	-0.332856	1.667	-0.0341765
ZNF7	1.30817	-0.50178	0.832652	-0.832959	-0.806085
NIT2	0.162958	-1.5757	0.876439	0.806042	-0.269737
C9orf85	1.56936	-0.762999	-0.675751	-0.560161	0.429549
BTRC	-0.193053	-0.614164	-0.340631	1.7594	-0.611556
C1orf109	0.407862	-0.884008	-0.110203	-0.90435	1.4907
SETMAR	0.203551	-0.836845	-0.235267	-0.754356	1.62292
SLC52A2	1.50551	-0.781683	0.512428	-0.399437	-0.836821
COL9A3	1.76209	-0.142051	-0.540014	-0.540014	-0.540014
GUSBP1	1.42283	-0.805014	0.677012	-0.523132	-0.771691
HCG18	0.353032	-0.745689	-0.449319	1.59635	-0.754377
KDELC1	0.722959	-0.785608	-0.67568	1.40141	-0.663076
LINC00526	0.913973	-0.654781	-0.803399	1.25759	-0.713387
MGME1	0.201984	-0.642871	-1.16925	0.140801	1.46934
CETN2	-1.46384	1.1447	0.690965	-0.174062	-0.19776
ZFHX4	-0.232875	1.39323	-0.665355	-1.09587	0.600867
FARSA	0.0349746	-0.63874	-0.458421	1.71779	-0.655608
KAT6B	0.851151	-1.01435	0.809527	0.508231	-1.15455
LIX1	1.59791	-0.0276446	-0.815462	-0.875434	0.120628
RER1	0.287902	-0.971327	0.287511	1.38383	-0.987918
FRMD4B	0.0529371	-0.651657	-0.256531	1.68082	-0.825572
SALL2	1.30821	-0.53932	-0.987764	-0.596994	0.815867
GPS2	0.918119	-1.43639	0.591088	0.572606	-0.64542
CWC27	0.613449	-1.14264	-0.753154	1.32257	-0.0402287
CCDC50	-1.38869	-0.704581	0.866695	0.802621	0.423957
AAK1	1.5236	-1.24353	-0.142601	-0.295108	0.157636
EFNB2	1.76624	-0.634394	-0.558359	-0.316324	-0.257158
TATDN3	0.00647259	-0.855729	-0.37924	1.70266	-0.474159
AIMP1	-0.132903	-0.806889	-0.255183	1.72713	-0.532152
RPF1	-0.282284	-0.583161	-0.0689179	1.71997	-0.785611
RASL11B	0.961648	-0.747764	0.0467476	0.983222	-1.24385
GCFC2	0.193114	-0.641906	-0.269616	1.62805	-0.909637
DNAJB12	-0.160501	-0.46449	-0.461328	1.75881	-0.672492
CBY1	0.700984	-1.34463	-0.745365	0.394237	0.994779
LOC728554	0.154039	-1.09342	-0.273479	1.599	-0.386142
MRPL20	0.0279338	-1.25453	-0.602371	1.35605	0.47292
CCNL2	0.647237	-0.58773	-0.00479626	1.24429	-1.299
HSPH1	1.48913	-1.0347	-0.475038	0.503263	-0.482654
GADD45GIP1	-1.07938	-0.45245	-0.557653	1.30577	0.783715
USP3	1.01327	-0.602805	-0.27551	-1.19107	1.05611
TP53	0.752285	-0.287371	-0.703958	-1.06946	1.3085
ACAA2	-0.387971	-1.1567	-0.413271	0.518551	1.43939
MARS	0.591409	-0.684138	-1.2218	1.29969	0.0148397
DTYMK	1.33699	-1.40639	0.166382	-0.366417	0.269434
SNRNP200	-0.860282	0.564958	-0.0748124	1.38228	-1.01215
TDG	-0.884846	1.63951	-0.708601	0.0907039	-0.136769
SPTAN1	-1.49665	0.820598	-0.242371	-0.0913248	1.00974
FUNDC2	0.344295	-1.50979	-0.373827	1.14216	0.397163
CIT	0.335479	-0.424735	-0.531371	-0.960928	1.58156
NUP50	0.0566311	-1.29238	-0.683469	0.865451	1.05376
TXLNG	1.69275	-0.150424	-0.053294	-0.76032	-0.728717
PDE4B	0.0600848	-0.674308	-0.373135	1.70096	-0.713597
ZBTB45	1.7659	-0.268312	-0.296135	-0.609415	-0.592041
UTRN	1.56176	0.0699295	-0.491881	-1.14631	0.00650827
CEP290	1.15446	-1.51978	-0.115849	0.578449	-0.0972734
ZFC3H1	0.912907	-0.680373	-0.0831566	-1.23349	1.08411
PPP2R3A	0.215799	-0.886401	-0.300139	-0.656223	1.62696
CYHR1	0.170542	-0.863833	-0.38576	1.65615	-0.577103
MAPK1	0.131312	-0.693427	-0.294372	-0.806357	1.66284
THUMPD2	-0.153941	-1.35229	1.04535	0.919157	-0.458274
STX10	-0.136638	-0.760632	-0.291733	1.73704	-0.548039
KIN	-0.48187	0.873504	-0.596183	1.24867	-1.04412
PDZD11	-1.06497	1.16367	-0.540216	-0.528378	0.969898
LAMTOR4	-0.396167	-1.2306	-0.420904	0.857939	1.18973
ATP6V0E2	-0.378518	-1.18849	-0.44911	0.683909	1.33221
NIPBL	0.610309	-1.26261	-0.685724	1.24692	0.0911048
C8orf33	0.201782	-0.511934	-0.946135	1.63137	-0.375079
PSMG2	-0.712961	0.315483	-0.426322	1.61004	-0.786241
MTERF4	0.880402	-0.713144	-0.922996	1.26636	-0.51062
MARK1	-1.20637	0.365194	0.0355534	1.42397	-0.618341
NPDC1	-0.0767328	-0.656764	-0.234196	1.71667	-0.748978
SURF4	-0.892102	0.0769224	-0.0718005	1.62665	-0.739665
TP53I11	-0.369855	1.63346	0.243458	-0.76099	-0.746076
FLRT3	1.3714	-0.67965	-0.27728	0.657213	-1.07169
SEC23B	0.576554	-0.574723	-0.975925	1.4644	-0.490302
SLC16A1	0.0607902	-1.0066	-0.218547	-0.480231	1.64459
RTCA	1.61416	-0.300117	0.25822	-0.815735	-0.756524
FAAP20	0.729032	-1.51534	0.888761	0.383008	-0.485462
PITPNB	0.114552	-0.992265	-0.670549	1.59696	-0.0486988
ARL8B	1.42025	-1.10305	-0.562853	0.580637	-0.334982
THUMPD1	0.845648	-0.792483	-0.862949	1.29492	-0.485134
TSPAN14	1.63243	-0.524777	0.283846	-0.770141	-0.62136
SPATA13	1.68597	-0.473987	-0.156723	-0.10841	-0.94685
IREB2	-0.769445	0.283027	-0.298887	-0.817753	1.60306
NPEPPS	0.417088	-0.779944	-0.272296	1.5304	-0.895246
GKAP1	1.75789	-0.261822	-0.298497	-0.466386	-0.73119
VASH1	-0.487142	1.67346	0.177365	-0.70388	-0.659798
DDX23	-1.474	0.360268	-0.399973	0.314177	1.19952
ARF3	0.06878	-0.587195	-0.243922	1.66577	-0.903431
KXD1	-1.4613	0.0880181	-0.278689	1.28133	0.370645
CCDC101	-0.0126386	-0.5293	-0.407162	1.72024	-0.771142
ZNF22	0.80196	-0.281673	-0.137235	-1.45353	1.07048
BASP1	-0.910912	1.00483	0.719821	0.402866	-1.2166
KIAA1217	1.77361	-0.222988	-0.471352	-0.539635	-0.539635
PREX1	-0.853791	0.243658	-0.907358	1.54519	-0.0276976
RELL1	-0.381925	-0.85493	-0.48723	1.69858	0.0255021
TAF6	0.51534	-1.01459	-0.699245	1.46467	-0.266173
PRADC1	-1.15057	1.48149	-0.314942	0.429074	-0.44505
MT2A	-0.590338	-0.35198	-0.269651	-0.560305	1.77227
FBXO34	0.949144	-1.5821	-0.344299	0.485329	0.491928
IGDCC3	-0.178992	1.76683	-0.466786	-0.558468	-0.562583
SLC25A39	-1.00881	0.408312	0.534607	1.15714	-1.09124
MCM4	-0.313818	-0.758358	-0.618482	-0.0249382	1.7156
CDC25B	-1.16255	1.12612	-0.250243	0.942285	-0.65561
NOL4L	1.67198	-0.142874	-0.877373	-0.643611	-0.00811692
ADH5	0.309078	-0.624719	-0.538472	1.62278	-0.768663
RAP1B	1.26118	-1.03084	-0.87936	0.750494	-0.101473
ITGB8	0.0226701	-0.880064	0.051023	-0.800403	1.60677
CYB5R3	0.95706	-1.48304	0.040686	0.861204	-0.375912
MRPS34	0.459078	-1.13909	-0.0833205	1.42891	-0.665575
C21orf59	1.53153	0.101177	-0.847566	-0.948261	0.16312
XPR1	-0.749948	1.06682	1.1219	-0.773137	-0.665636
NUP160	-0.74732	-0.180463	-0.146793	1.72262	-0.648048
COMMD9	-0.990172	0.00921503	-0.142106	1.6498	-0.526734
SMARCA1	0.95208	-1.14223	-0.116673	1.08297	-0.776151
CTNND2	-0.701208	0.072495	1.69903	-0.387559	-0.682755
YARS	-0.936392	-0.0460626	0.595818	-0.966704	1.35334
NOP56	1.15468	-0.497258	-0.848852	1.01239	-0.820958
CDCA8	0.955782	-1.32551	-0.163755	1.02845	-0.494965
AKR1B1	1.36907	-0.932939	-0.331313	0.702579	-0.807395
UBE2N	1.15602	0.33594	-0.0620779	-1.58805	0.158169
PSME2	1.57146	-0.924064	-0.155382	0.269471	-0.761485
POLD2	0.883887	-1.47961	-0.342978	-0.0160708	0.954775
SEC61G	0.624841	-0.586858	0.521969	0.910811	-1.47076
DEK	0.596648	-1.11318	-0.105792	-0.73765	1.35997
KIF20A	1.25076	-0.789975	-0.345986	0.860546	-0.975344
FABP5	-0.757794	-0.470512	0.143281	-0.596609	1.68163
CDC20	1.57229	0.102479	-0.0873577	-1.14713	-0.440283
PUM1	-0.936038	0.47463	-0.369959	1.5148	-0.683432
FOXK1	-0.648861	1.45239	-0.156113	0.462298	-1.10971
POMP	1.64021	-0.239131	0.0996554	-0.509005	-0.991726
CCT7	1.51674	-0.672758	-0.031998	0.270843	-1.08283
RPL18A	0.7667	-0.0363905	0.946482	-1.58311	-0.0936794
RPL13	0.629249	-0.391356	1.3185	-1.27884	-0.277553
RDX	-0.243827	-0.975565	-0.663298	0.31821	1.56448
NPM1	1.4738	-0.0185704	0.26088	-0.479251	-1.23686
RPL23	-0.753263	1.64596	0.194211	-0.761427	-0.325476
SRSF2	1.73888	-0.219266	-0.237255	-0.798835	-0.483523
YWHAQ	-0.273922	0.28351	0.451481	-1.55991	1.09884
RPL35A	1.12211	-0.0596735	0.551943	-1.5587	-0.0556796
MALAT1	0.0757934	1.19351	0.192063	-1.58657	0.125202
UQCRH	0.731392	-0.405625	0.350497	-1.55243	0.876163
NIFK	1.19424	-0.79342	-0.503505	-0.866668	0.969355
TMEM230	0.116563	-1.17927	-0.854494	0.840778	1.07642
FKBP4	0.794142	-0.98941	-0.381732	1.30787	-0.730869
CHCHD1	0.845949	-1.6648	0.14155	0.701555	-0.024251
PHAX	0.186578	-0.918244	-0.750672	1.59552	-0.113187
USP9X	-0.59413	1.56331	0.439169	-0.800333	-0.608012
LYPLA1	1.42653	-1.0164	-0.461359	-0.573462	0.62469
CHCHD6	0.150261	-1.18257	-0.377764	1.55418	-0.144109
NUCB1	0.20374	-0.988912	-0.569639	1.60969	-0.254876
BAIAP2	1.46618	-1.13902	-0.52684	-0.257541	0.457222
MLLT10	-0.941671	-0.346931	-0.557109	0.223141	1.62257
UBE3C	-0.470344	1.78674	-0.363718	-0.487128	-0.465553
MEIS3	-0.651624	1.73808	-0.114691	-0.299964	-0.671805
PHLDA2	-0.44393	1.78885	-0.448307	-0.448307	-0.448307
CTXN1	-1.18263	0.631484	0.130462	1.23433	-0.813643
RNF170	-0.565829	-0.208578	-0.424715	1.76939	-0.570269
HAUS8	-0.799196	0.41494	-0.365031	1.5526	-0.80331
COLGALT1	-0.940978	0.622856	-0.109249	1.35897	-0.931599
RFWD3	-1.17539	-0.632826	-0.218757	1.25416	0.772811
DENND6A	-1.13462	1.26455	-0.857063	0.124162	0.602977
PWWP2A	-0.780873	1.20286	-0.607404	0.975103	-0.789686
NRCAM	-1.02518	0.000539641	-0.0153539	1.61726	-0.577271
SPATA7	-1.04598	0.716178	0.255392	1.1154	-1.041
MTA1	-1.07366	0.945987	1.01218	0.0757555	-0.960266
GNB5	-1.42189	0.446761	-0.575717	1.12517	0.425676
HMGN4	-1.49036	-0.308552	0.174126	1.22064	0.404141
DFNA5	-1.61495	0.0694774	0.179679	1.14231	0.223484
SLTM	1.62033	-0.720865	-0.698117	0.315996	-0.517348
CENPK	-1.00339	1.51919	-0.630389	-0.317741	0.432326
RABEPK	0.833262	-0.617958	-1.05726	1.27291	-0.430954
CISD2	1.09144	-0.624446	-0.222679	0.959368	-1.20368
MOB3B	-0.750566	1.74019	-0.0969024	-0.462775	-0.429943
PITHD1	1.36291	-0.816575	-0.432293	-0.857742	0.743704
GFOD2	-0.418889	-1.13613	-0.462796	0.632243	1.38558
MRPL38	-1.06316	1.24483	-0.521582	0.873612	-0.533699
SCD	-0.945324	-0.565371	-0.182312	1.65901	0.0339937
POLH	0.00262976	-0.879799	-0.705005	1.65053	-0.0683534
APOA1BP	1.09389	-0.744828	-0.510805	1.07451	-0.912766
CADPS	1.78549	-0.354098	-0.427684	-0.501856	-0.501856
SMYD3	0.455822	-1.17182	-0.562556	1.44091	-0.162354
SLC35A2	1.32447	-0.433072	-0.624406	-1.03702	0.770021
MED23	0.407404	-0.775579	-0.382328	1.55946	-0.808957
GTF2E2	0.524348	-0.716168	-0.0155411	1.3667	-1.15934
TMEM161A	0.337762	-1.00205	0.588747	1.16301	-1.08748
CAPN7	0.448122	-1.23581	-0.813013	1.20645	0.394252
CDCA7L	1.73649	-0.55518	-0.588439	-0.0186027	-0.574266
PIGP	1.59266	-0.501745	0.01694	-1.10061	-0.00723822
LINC00888	1.71346	-0.216031	-0.0749064	-0.71126	-0.71126
RPL23AP7	0.0435954	-0.939214	-0.191769	1.65904	-0.571652
USP32	1.64698	-0.0766713	-0.522473	-1.00331	-0.0445216
SNX5	-0.121688	-1.00894	-0.0965395	-0.436399	1.66357
SMAD1	0.970377	-0.319958	-0.804751	1.14872	-0.994389
MBTPS1	0.25136	-0.262133	-0.801635	-0.797017	1.60942
SUZ12	-0.153227	-0.754592	-1.01544	0.448539	1.47472
SDF2L1	0.653837	-0.753017	-0.519904	1.43727	-0.818184
ATF6B	-0.0295624	-0.573544	-0.610025	1.73842	-0.52529
DNPH1	1.33951	-0.432737	-1.16126	0.69184	-0.43736
ABCF2	1.51904	-0.275017	-0.96656	0.428794	-0.706254
HDGF	-0.712178	1.24111	0.276954	0.47769	-1.28357
NCAPH2	0.106772	-1.35188	-0.405993	1.38819	0.262907
COPS7B	1.45151	-0.450572	-0.876908	-0.737827	0.613795
NSFL1C	-1.50085	0.0116664	-0.0848444	1.28769	0.286337
GOT2	-0.468802	-0.890036	0.017569	-0.35119	1.69246
UBLCP1	1.18792	0.230673	0.642065	-1.0414	-1.01926
NRDE2	-0.218321	-0.611002	-0.56582	-0.371457	1.7666
SLC1A3	-0.795519	-0.569692	-0.0789766	-0.276286	1.72047
GNPDA1	1.23355	-0.100869	0.385702	0.00457536	-1.52296
MUM1	0.0078332	-0.58698	-0.58287	1.73003	-0.568016
MRPL41	-0.951544	-0.0715525	0.400961	1.4805	-0.858365
PGRMC1	0.889778	-1.0738	-0.771381	-0.230759	1.18616
SPP1	-0.207655	-0.663248	-0.456114	1.76543	-0.43841
EZH2	-0.407384	-1.10522	1.06826	1.05061	-0.606263
DHX40	1.78426	-0.395339	-0.569375	-0.416783	-0.402766
PPP2R5E	1.38499	-0.0210651	-0.865718	0.528003	-1.02621
UBXN7	0.67303	-0.300607	-0.429655	-1.25014	1.30737
PHB2	0.373136	-1.41532	-0.501319	0.31617	1.22733
NKTR	0.28398	-1.07171	-1.0289	1.08453	0.7321
BLOC1S1	-0.684676	-1.12477	0.244084	1.48317	0.082193
GADD45A	1.65132	-0.148311	0.0718394	-0.841808	-0.733039
E2F7	-0.515673	1.55011	-0.406473	0.382029	-1.00999
SC5D	-0.180831	-0.925977	-0.55898	1.67253	-0.00674305
COX14	0.264504	-0.837983	-0.101102	1.56001	-0.885426
TAF8	0.626527	-0.304455	-0.884351	1.41574	-0.853456
WDR36	1.69821	-0.0954223	-0.13467	-0.808756	-0.659361
HLA-C	-0.8533	1.37301	-0.773169	0.741882	-0.488419
MRE11A	1.622	0.0716162	-0.780575	-0.0455043	-0.867537
SLC35E2	0.765096	-0.999981	0.347321	1.01329	-1.12573
SH3BGRL	0.103009	-1.38145	-0.570608	1.076	0.773052
PHGDH	0.92394	-0.694937	0.0337745	-1.27763	1.01485
SAE1	-0.0707171	-1.04897	-0.890897	1.20496	0.805619
PIH1D1	-1.01494	1.37844	0.152552	0.417764	-0.933809
ZMIZ1	-0.117226	1.70202	-0.241152	-0.925342	-0.4183
EIF3G	-1.22934	0.565629	-0.697323	1.29546	0.0655785
HIGD1A	0.0310906	-1.36708	-0.158143	0.0438966	1.45024
TPM3	-0.0816935	-0.667798	0.878044	-1.24074	1.11219
PSMD9	0.853488	-0.810109	0.874656	-1.30426	0.386223
RSPRY1	0.414757	-0.289295	-0.574579	1.51167	-1.06255
IFT88	-0.202919	-0.798003	-0.47567	1.73969	-0.263101
ZNF266	1.59952	0.0434527	-0.16051	-1.13812	-0.344335
PEMT	0.159835	-0.920093	-0.515359	-0.374289	1.64991
ATP6V0A1	0.0142405	-0.579685	-0.33693	1.7048	-0.802428
ACAP2	0.442393	-1.29021	-0.683059	1.26609	0.264785
DPCD	0.703524	-1.39263	-0.434644	1.17233	-0.0485739
DDX18	1.36206	-0.284716	-1.29983	0.529228	-0.306745
DOK5	1.1737	-0.254947	-0.871712	-0.971266	0.924227
SERP1	0.196564	-0.844757	-1.15309	1.28523	0.51605
MEAF6	0.961909	-1.1546	-0.0570778	1.04878	-0.799019
VPS29	1.22687	-0.102126	0.607071	-1.42099	-0.310828
ZWINT	0.540463	-0.239326	0.0454393	-1.51278	1.16621
BRD8	1.38308	0.243318	0.0335899	-0.260343	-1.39964
TOMM5	1.30375	-0.359134	-0.29774	-1.29127	0.644392
RBM39	1.37596	-0.973984	-0.32593	-0.762234	0.686188
KRTCAP2	1.43229	-0.980005	-0.758301	-0.27495	0.580969
EIF4E	1.51992	0.0215972	-0.598107	0.194123	-1.13753
TIA1	0.181903	1.58419	-0.773716	-0.0682794	-0.924098
RPL32	0.327878	-0.444484	1.44199	-1.26985	-0.0555315
FTL	-0.540949	1.12083	0.626861	-1.41886	0.212117
NAP1L1	-0.0569025	1.71696	-0.573367	-0.797922	-0.288766
PBK	0.699683	-1.17523	-0.825139	0.101475	1.19922
ESD	1.37522	-0.961351	-0.638141	-0.501135	0.725406
U2SURP	0.153666	1.44519	0.21201	-1.2242	-0.586666
DDAH2	-1.63023	0.597938	0.971728	0.169444	-0.108881
HSP90AB1	0.403565	-0.699598	-0.459933	-0.815838	1.5718
VAPA	0.864004	-0.175515	-0.0212889	-1.55828	0.891075
CCL5	-1.27087	0.582889	0.296589	1.16538	-0.773983
RNF181	-0.59204	1.55298	-0.847677	0.449704	-0.562971
LINC01551	1.49677	0.559913	-0.701482	-0.543743	-0.811454
2022-09-02	-0.467667	-0.960803	-0.572802	0.487072	1.5142
VAV2	0.165565	1.6245	-0.177488	-0.836892	-0.775687
PRNP	-0.444032	1.67641	0.138856	-0.557081	-0.814157
NXT1	0.358256	-1.08368	-0.655122	1.50119	-0.120645
C1orf52	-0.167724	-1.2573	-0.548922	0.720964	1.25298
UBXN11	1.06377	-0.544387	1.10624	-0.928873	-0.696752
YES1	-0.5741	1.34662	0.79346	-0.808316	-0.757668
SLIT2	1.76613	-0.170129	-0.555759	-0.488947	-0.551291
CEP57L1	-0.0842348	-0.758489	-0.0306384	1.66861	-0.795244
THOP1	1.67938	-0.804941	-0.260212	-0.678186	0.0639545
RAB2B	1.29809	-0.751068	0.757732	-0.248939	-1.05581
BLMH	-0.500297	0.789803	-0.641178	1.32757	-0.975895
GEMIN2	0.532802	-0.831886	-0.592635	1.51246	-0.620745
DVL3	-0.380427	1.77237	-0.255905	-0.52811	-0.607932
SETD8	0.161383	-1.06366	-0.409473	-0.296644	1.60839
CEP152	0.711744	-1.26453	-0.904023	0.639044	0.817768
RNF114	0.24834	-1.60265	0.252874	1.14204	-0.0406116
CASP3	-0.339462	-0.585667	-0.42755	1.7818	-0.429122
ELP3	-0.141515	-0.652356	-0.462236	1.75762	-0.501514
RPP14	1.02094	-0.903606	-0.127038	1.03562	-1.02592
RNF24	-0.544292	1.03346	-0.32379	1.03919	-1.20456
CTBP2	-0.910319	0.170998	-0.428618	-0.482878	1.65082
CTTN	0.0991655	-0.598874	-0.420331	1.6912	-0.77116
LEPROTL1	-0.145349	-0.676407	-0.428337	1.75565	-0.505553
PTS	0.98588	-0.765805	1.19141	-0.591809	-0.819681
MASP1	1.55906	0.171883	-1.15471	-0.145972	-0.430265
C19orf43	1.49474	-1.20849	-0.486901	-0.0547664	0.255419
ABL1	0.883342	-0.570099	-0.556747	1.25204	-1.00853
USP33	1.18383	-0.883642	0.345633	-1.18596	0.540148
HINT3	-1.29363	0.655814	-0.561828	1.25602	-0.0563779
MEA1	-0.113858	-1.18467	0.0709844	1.56905	-0.341504
TMEM91	-0.441509	1.78498	-0.347398	-0.465157	-0.530913
CALU	0.15195	-1.05049	-0.985821	1.19332	0.691038
ATOX1	1.24249	-1.12066	0.657273	0.0925393	-0.87164
ITGAE	1.74085	-0.751457	-0.162261	-0.548411	-0.278717
LARP7	1.2894	-1.09541	-0.509711	-0.485524	0.801245
SOAT1	-0.81807	1.10563	-0.492939	-0.857588	1.06296
KLHL23	-1.43619	1.19885	-0.359081	-0.0126985	0.609123
MAGI3	-1.0505	0.975267	-1.01796	0.941269	0.151922
ZMYM4	-0.723327	1.65943	0.139379	-0.788082	-0.287397
CDK6	-1.08018	1.03153	0.4954	0.620412	-1.06716
ABHD17C	-0.692474	1.40733	0.717178	-0.725443	-0.706596
TMEM199	-0.668442	-0.280768	-0.223509	1.75614	-0.583419
TNRC6C	-0.993079	1.18375	0.194448	-1.05875	0.673624
SEMA6A	-1.17168	-0.23921	-0.651563	0.93492	1.12753
CTDSPL2	-1.05776	0.561862	-0.417007	1.45015	-0.537237
NUDT11	0.727209	-0.944266	-0.640973	1.37785	-0.51982
NAA10	-0.133653	-1.13479	0.558535	1.38705	-0.677144
RBM41	-0.522331	1.47794	-0.931452	0.568851	-0.59301
XPA	-0.538994	0.989411	-0.225411	-1.26455	1.03955
MRPL37	1.17707	-0.860935	-1.1138	0.795454	0.00220823
UBE3A	-0.903063	1.43979	0.140348	-0.995257	0.318178
NTPCR	0.56387	-0.617356	-0.849844	1.49346	-0.590133
ENC1	-0.837812	-1.09018	0.952302	1.09064	-0.114948
TRIB2	1.48612	0.161552	0.203767	-0.996053	-0.855391
GABBR1	1.58733	0.383869	-0.541062	-0.621117	-0.809017
RNF41	-0.11089	-0.55936	-0.416245	1.74976	-0.663261
SLMO2	-0.163177	-1.07654	0.0248361	1.62623	-0.411345
KHDRBS2	-0.676046	0.255697	-0.563484	1.64866	-0.664825
OBSL1	-0.727418	1.34545	0.804866	-0.727418	-0.695477
PLEKHA6	-0.69069	1.70221	0.0597032	-0.380535	-0.69069
CREG1	-1.21933	1.08413	-0.719172	0.904527	-0.0501567
F11R	-0.599159	1.76265	-0.416082	-0.171653	-0.575754
MRRF	-1.2738	-0.332659	-0.408429	1.19461	0.820278
CCDC148	-1.03865	-0.14311	-0.613756	1.57307	0.222453
PACSIN3	-0.488091	1.7841	-0.488091	-0.488091	-0.319828
TOMM34	-0.807133	0.233289	-0.228506	-0.807133	1.60948
TCFL5	-0.753907	0.464713	-0.50394	1.54704	-0.753907
ARFGAP1	-0.717173	1.63259	0.285298	-0.505295	-0.695416
SLC25A14	-1.03892	0.57454	0.315069	1.18824	-1.03892
BBS12	-0.454158	1.78872	-0.426251	-0.454158	-0.454158
SERPINI1	-0.493132	1.78281	-0.303413	-0.493132	-0.493132
THBS3	-0.757525	1.75099	-0.427343	-0.189954	-0.376164
EFNA1	-0.621753	1.72647	-0.605311	-0.515812	0.0164084
TMEM8B	-0.748893	-0.319716	0.0524679	1.69507	-0.678925
MED18	-0.657809	1.7443	-0.221871	-0.20681	-0.657809
PPP1R8	-0.681494	1.61752	-0.586815	0.332285	-0.681494
RAB35	-1.49506	1.16456	-0.345412	0.16351	0.512396
SH2B3	-0.460526	1.78837	-0.406793	-0.460526	-0.460526
FLT1	-0.471542	1.78751	-0.464463	-0.471542	-0.379965
GNG11	-0.924228	-0.514556	-0.127215	-0.122174	1.68817
REPIN1	-1.20369	-0.0975875	-0.71427	1.01815	0.997395
ZNF865	-0.720993	0.802959	-0.707964	-0.720993	1.34699
PINLYP	-1.02111	0.199059	0.624581	-1.02111	1.21858
GPATCH1	-0.733739	1.45658	0.638532	-0.733739	-0.627628
DET1	-0.818309	-0.091364	-0.720256	1.67372	-0.0437904
TENM4	-0.756323	-0.0129868	-0.163177	1.68411	-0.751626
ZNF629	-0.483668	1.7851	-0.334094	-0.483668	-0.483668
TSPYL4	-0.913236	1.37914	0.629814	-0.913236	-0.182485
LRRTM3	-0.648749	1.66783	-0.577608	0.207276	-0.648749
ZBTB7A	-0.531688	1.76702	-0.171955	-0.531688	-0.531688
METTL1	-0.998456	1.64762	0.0770841	-0.266232	-0.460015
HGSNAT	-1.00845	0.935838	1.10382	-0.0930394	-0.938167
LONRF1	-0.728787	-0.15748	-0.137731	1.71633	-0.692329
GIPC1	-1.03838	0.537444	0.339564	-1.03838	1.19975
SYCE2	-0.534787	1.76525	-0.160892	-0.534787	-0.534787
DOK4	-0.951969	-0.0671093	-0.896398	1.43271	0.482764
ZNF219	-0.492313	1.7847	-0.32919	-0.492313	-0.470885
CHD8	-0.711953	1.65184	-0.457632	0.227293	-0.709548
DHRS4	-0.790147	0.269829	-0.298671	1.60914	-0.790147
CLN5	-1.0865	1.36027	-0.520801	0.701203	-0.454167
VILL	-0.684185	1.64182	0.269978	-0.684185	-0.543429
POLM	-0.559183	1.74841	-0.0708575	-0.559183	-0.559183
UPP1	-0.729061	1.19053	-0.727533	-0.729061	0.995126
ACYP2	-1.17433	-0.00638524	-0.669317	0.444585	1.40544
MED11	-0.65074	-0.152141	-0.29138	-0.65074	1.745
TANC2	-1.05522	-0.031464	-0.446582	1.63572	-0.102458
NUP153	-0.795431	-0.0718662	-0.548679	1.72253	-0.306551
NR2F1	-0.698437	0.595168	-0.687802	1.48457	-0.693499
NIM1K	-0.681163	1.53171	0.511782	-0.681163	-0.681163
RNASEH1	-0.814832	-0.139599	-0.335759	1.73402	-0.443834
POMT2	-1.04295	0.644732	-0.265362	-0.718444	1.38203
NUDT14	-0.976116	1.07389	-0.226871	1.02219	-0.893093
OTULIN	-0.544267	-0.260964	-0.427266	-0.544267	1.77676
TFCP2	-0.502236	1.78005	-0.273336	-0.502236	-0.502236
FBXO45	-1.13964	-0.502348	-0.356903	0.597141	1.40175
TMEM181	-0.889171	0.933984	-0.436316	1.21311	-0.821608
C6orf226	-0.670273	1.56688	0.443938	-0.670273	-0.670273
USP49	-0.596273	1.72998	0.00665237	-0.596273	-0.544089
NFYA	-0.697843	0.299035	-0.544842	1.62973	-0.686083
DHX57	-0.80832	0.623636	-0.455151	1.44815	-0.80832
PURA	-0.66135	1.72893	-0.366697	-0.0395332	-0.66135
CTIF	-0.615316	-0.0463241	-0.46273	1.73969	-0.615316
MBP	-0.450408	1.78883	-0.437604	-0.450408	-0.450408
PITPNM1	-0.775658	0.569218	-0.506559	1.48866	-0.775658
SART1	-0.679286	-0.0190865	-0.342626	1.72029	-0.679286
FGFBP3	-1.34513	0.0457752	0.419033	-0.461361	1.34168
GRIP2	-0.447656	1.78885	-0.445887	-0.447656	-0.447656
SLC17A7	-0.529763	1.78303	-0.419934	-0.325632	-0.507704
PPFIA2	-1.05717	-0.795313	-0.24102	1.06124	1.03226
LDLRAD4	-0.984728	1.44089	-0.0558982	0.459754	-0.860022
SPATA20	-0.600788	1.7052	0.0971596	-0.600788	-0.600788
CALCOCO1	-1.40055	0.572382	-0.356897	1.25633	-0.0712623
FBN3	-0.773426	1.67405	0.0498523	-0.205811	-0.744666
HIST1H2AE	-0.711435	1.61454	0.329967	-0.711435	-0.521637
TKTL1	-0.613901	-0.397203	-0.127753	-0.613901	1.75276
TRIM4	-0.847296	1.57644	-0.130698	-0.847296	0.248848
ZNF267	-0.761445	1.25914	-0.649209	-0.761445	0.912956
ATP6V0E2-AS1	-0.780673	0.573468	-0.497092	1.48497	-0.780673
INTS6-AS1	-0.508787	1.7777	-0.251343	-0.508787	-0.508787
IPW	-0.845562	1.29563	0.835395	-0.439899	-0.845562
LINC00094	-0.718872	1.41045	0.712473	-0.718872	-0.685176
LINC00883	-0.762058	-0.0931857	-0.513588	1.7356	-0.366764
LOC101927151	-0.820704	0.128082	-0.106879	1.6202	-0.820704
PDXP	-0.737749	1.27071	0.901073	-0.737749	-0.696285
PRG2	-0.447324	1.78885	-0.447324	-0.447324	-0.446884
YTHDF3-AS1	-0.664253	1.58407	0.408687	-0.664253	-0.664253
STK17B	0.188505	-0.56321	-0.482831	1.66296	-0.805422
TMEM9	-0.245715	-1.27218	0.152039	1.50915	-0.143302
MRPS25	0.115697	-0.470376	-0.787364	1.68755	-0.545511
CD320	0.676152	-1.45816	0.0687592	1.11738	-0.404131
AMBN	1.36587	0.304043	-0.987222	0.30453	-0.987222
PWARSN	-0.026483	-0.714294	0.450432	1.41876	-1.12841
PTPN11	-0.847022	-0.129521	-1.05768	1.21468	0.819542
NFYB	0.985725	-1.00458	-0.86616	1.10482	-0.219797
R3HCC1	0.035809	-1.08261	-0.737811	1.47962	0.30499
PASK	1.04434	-1.55207	0.0472996	0.673039	-0.212606
QSOX1	0.508921	-0.923899	0.0196411	1.38276	-0.987422
MIA3	-0.254782	-1.21694	-0.19061	1.55093	0.111402
EPC2	1.25119	-0.740107	-0.574165	0.913327	-0.85025
NAT10	1.09061	-0.649641	1.09766	-0.769313	-0.769313
ID1	0.787887	-1.01612	0.777429	0.617459	-1.16666
PLCH1	1.78863	-0.431232	-0.431426	-0.462986	-0.462986
FPGT	0.208174	-1.51396	-0.275332	1.20214	0.378977
PDP1	0.225523	-0.66926	-0.554387	1.66004	-0.66192
GMEB1	0.341935	-0.760541	-0.405806	1.59545	-0.771041
GTPBP10	1.73499	-0.513841	-0.016773	-0.612884	-0.591494
MIOS	1.76556	-0.54346	-0.509136	-0.164031	-0.548932
PHC1	0.254001	-1.51712	0.878043	0.820522	-0.435446
PDCD2L	1.4871	-0.750623	-0.448507	0.556904	-0.844871
TMEM263	-0.47729	-1.0937	0.04499	-0.076542	1.60254
CRADD	-0.119136	-0.713249	-0.432344	1.74825	-0.483519
GLCE	1.09394	-0.807968	-0.450259	1.06557	-0.901283
MGAT1	1.60734	-0.736405	-0.365554	0.300861	-0.806241
MAP2K4	1.40133	-0.694222	0.726116	-0.716614	-0.716614
SLC25A32	0.369261	-0.680978	-0.517901	1.59539	-0.765775
CARS	0.549568	-0.907022	-0.227116	1.44399	-0.859419
CASC15	0.477873	-0.819085	-0.468601	1.53479	-0.724973
KIAA1033	1.02375	-0.841112	-0.469289	1.13911	-0.852453
PAPD7	0.551156	-0.854584	1.45637	-0.276264	-0.876681
SYS1	0.913206	-1.01108	0.239185	-1.08962	0.94831
GRN	-0.86411	0.62161	-0.584664	1.45833	-0.631163
PNKD	1.33786	-1.0706	-0.588561	-0.416385	0.737677
NDUFA10	0.0972609	-0.90832	-0.0944029	-0.719159	1.62462
NUP35	1.69799	-0.553377	-0.771117	-0.457149	0.0836525
TIMM10	-0.738334	1.37885	-0.280879	0.659848	-1.01948
UXT	0.7323	-0.131915	0.985588	-1.57315	-0.012827
JADE1	-0.45713	-0.936372	-0.531094	1.58686	0.33774
YTHDF2	1.29138	0.194849	0.455877	-1.28779	-0.65432
SEC11A	-0.496274	-1.12872	-0.27255	0.398734	1.49881
CISD1	1.31031	-0.483535	-0.353098	0.715114	-1.18879
NAA38	0.95179	-0.847653	0.292408	-1.24981	0.853263
SNHG1	1.6476	-0.897729	-0.63298	0.131293	-0.248184
CXXC4	1.12003	-0.327362	0.948449	-0.536585	-1.20453
KLF3	0.419532	-1.48791	-0.223849	1.24822	0.0440106
TMF1	-1.18081	0.0939453	-0.845956	0.884806	1.04802
HK1	-0.0185556	-0.67902	0.247339	1.52436	-1.07412
FNTA	-0.723456	0.102883	1.06283	0.836849	-1.2791
CDPF1	-0.443844	1.72238	0.0146861	-0.646609	-0.646609
GABPA	-0.819585	0.971117	-0.427876	1.17835	-0.902008
MSL3P1	-0.0595067	1.74264	-0.47059	-0.645633	-0.566905
ZNF799	1.69796	0.0722884	-0.37856	-0.695844	-0.695844
LDOC1	0.572648	-1.10391	-1.06099	0.969547	0.622697
AKR1A1	0.995427	0.192066	-0.0197294	0.486168	-1.65393
DDX47	-0.701949	0.332074	-0.415258	1.60011	-0.81498
FKBP8	-0.791012	1.27448	-0.674482	0.894519	-0.703503
SCG3	-0.729954	0.82126	0.166243	1.03996	-1.29751
RTN4	-1.66327	0.0977643	0.904054	0.637243	0.0242083
RPL7L1	1.73943	-0.25762	-0.749273	-0.168427	-0.564115
TMEM14B	1.1883	-0.747691	-0.496921	0.97166	-0.915344
UFC1	1.11323	-0.311653	0.26492	-1.5394	0.472907
RHNO1	0.912747	-1.29426	-0.681536	0.0507595	1.01229
USP22	0.9615	-0.220164	-0.12348	-1.49656	0.878701
ODC1	1.41559	-0.604391	-0.485089	0.656191	-0.982302
NDUFAB1	1.0472	-0.725533	0.431827	0.599625	-1.35312
RPS21	0.886277	-0.193933	1.18067	-1.05656	-0.816453
USP11	1.01065	0.0603295	0.825148	-1.44627	-0.449861
VBP1	0.681735	0.0640868	-0.0280041	-1.63811	0.920293
ELAVL4	-0.197868	1.71408	-0.393104	-0.216907	-0.906201
SH3BGRL3	1.21938	-1.38028	-0.349301	-0.166677	0.676878
SRI	0.530667	-1.14136	0.291346	-0.907988	1.22734
LSM4	1.74833	-0.381416	-0.745849	-0.154493	-0.466575
CCNB2	0.996844	0.127836	0.876396	-1.332	-0.669073
DCXR	1.50981	-0.0188467	0.31051	-0.877692	-0.923779
NDUFS6	0.501228	-1.56273	0.661672	-0.428145	0.827972
KIDINS220	-1.00726	0.139677	0.138036	1.52252	-0.792976
GTSE1	1.43993	0.157215	0.290356	-1.07839	-0.809113
TUBA1B	0.574061	0.106485	0.61324	-1.75281	0.459026
RPS8	0.786564	-0.14312	1.18991	-1.28023	-0.553125
SUMO1	0.0308789	1.70518	-0.755726	-0.349154	-0.631176
ATP5B	-0.0462927	1.17604	0.764649	-1.29051	-0.603893
ATP5G2	1.24269	-0.080685	-0.661568	-1.22138	0.720951
ATPIF1	0.993509	-0.669855	-0.673488	-0.837372	1.18721
ARX	1.37991	-0.45747	-1.34122	0.208996	0.209782
TSR2	1.42382	-0.149145	0.45867	-1.21155	-0.521788
TXNIP	-0.774475	-0.0458536	1.10308	-1.1761	0.89335
PENK	-0.739799	-0.912276	0.748661	-0.457105	1.36052
SZRD1	1.52837	-1.11814	-0.606448	0.213902	-0.0176914
ATP2B1	-1.18392	1.4839	0.303088	-0.549191	-0.0538727
KLC1	0.210227	-1.10189	0.355082	1.37996	-0.843378
CERK	-0.33374	1.02579	-0.495078	1.0355	-1.23248
ZEB1	-0.200511	-0.497699	0.240741	-1.10346	1.56093
MLLT4-AS1	1.45245	-0.181923	0.464752	-0.607179	-1.1281
APMAP	-0.529202	-0.910079	-0.562874	1.53519	0.466962
ZMYM3	-0.451736	1.75233	-0.132981	-0.697685	-0.469927
ANKRD13C	0.128869	-0.621684	-0.500173	1.69101	-0.698018
RAD18	1.52775	-0.189376	0.383708	-0.868958	-0.853119
RNF122	1.74232	-0.0921944	-0.370898	-0.644075	-0.635153
NEK1	1.2882	-0.451064	-0.781765	-0.900724	0.845352
CRLF3	0.787647	-1.35523	-0.239322	1.16508	-0.358173
AFG3L2	1.32589	-0.985048	-0.542747	0.7926	-0.590692
HIST1H1D	0.41129	-0.565731	-0.958571	-0.436603	1.54962
HSD17B12	-1.66303	0.0737035	0.448639	1.00454	0.136151
UBL4A	1.71113	-0.0123757	-0.298077	-0.732485	-0.668196
ALG5	1.01113	-0.670463	-0.0441437	0.965779	-1.2623
SLC30A9	0.0776609	-0.899715	0.71868	1.20551	-1.10214
EMC8	0.510717	-1.29651	-0.584351	1.30882	0.0613249
HECTD1	1.65569	-0.853393	-0.188306	0.0844397	-0.698434
TOB2	-1.01423	1.09377	0.159002	-1.04697	0.808435
UMPS	1.35499	-0.522352	-0.0290788	-1.28706	0.483502
C6orf203	-1.00005	-0.250356	-0.166261	1.68458	-0.267906
UCK2	-0.185533	1.76349	-0.402651	-0.625741	-0.549561
ARPC5L	-0.125263	1.5434	-0.728356	0.300803	-0.99058
ATG13	-0.622192	0.42729	-0.593296	-0.782267	1.57046
XRCC1	0.250773	-0.883751	1.26242	-1.14065	0.511208
ACD	0.399491	-0.639178	-0.344576	1.54562	-0.961353
ARL4A	0.672519	-1.01093	-0.746056	-0.288762	1.37323
ZNF562	0.428186	-0.926661	1.09763	-1.18662	0.587461
CCDC94	1.11698	-0.865129	-0.271255	0.992083	-0.972678
POLD3	-0.0794892	-0.978525	-0.488374	-0.121792	1.66818
PPP2R4	0.897345	-0.843403	-0.0606775	-1.11013	1.11686
TMEM254-AS1	1.77446	-0.539933	-0.235407	-0.44842	-0.550699
RBM10	-1.49796	0.755273	-0.503038	0.342936	0.902789
STAG2	-0.571655	-0.88127	-0.650347	0.689871	1.4134
FLNA	-0.498153	-1.37717	0.708337	1.1634	0.00358
MTF2	0.314949	-0.810841	-1.06619	1.44682	0.115265
MMAB	-1.52562	0.576158	0.129191	1.11278	-0.292514
TSPYL1	1.26759	0.283564	0.384495	-1.34965	-0.586001
ETFA	-0.0280887	-0.719506	-0.954089	0.101384	1.6003
NEMF	1.04236	-0.8193	-1.1192	-0.0941975	0.990332
PPIL1	1.73847	-0.36385	-0.107596	-0.50886	-0.758166
ZNRD1	-0.799564	0.852887	-0.247868	-1.03253	1.22708
SELT	0.74279	-0.502235	-0.628249	1.36136	-0.973666
RUFY3	-0.37713	-1.30544	-0.332031	1.09112	0.923475
MRPS33	1.42696	-1.01234	-0.812229	-0.117578	0.515191
METAP2	0.083228	-1.20758	-0.762565	1.23763	0.649285
PBRM1	-0.0501225	-0.902778	-0.956146	1.42677	0.482278
SIN3A	0.153916	-0.777596	0.124482	1.52073	-1.02153
RHOT2	1.0219	-1.08727	-0.477073	1.10753	-0.565087
SMNDC1	0.687509	-1.18817	-0.813171	0.113187	1.20064
NMU	-0.287035	-1.37013	0.809274	1.14018	-0.292293
TMCO1	0.846653	-1.62404	-0.251305	0.350936	0.677757
SUCLA2	-0.139085	-0.903517	-0.73343	0.163708	1.61232
KLF6	0.819454	-1.03306	-0.940788	-0.0185833	1.17297
SOX2	-0.974529	1.66944	-0.46202	-0.00998738	-0.222907
TMBIM4	-0.617513	0.751444	-0.713668	1.37997	-0.800232
ZC3H13	-0.0762923	1.36158	0.1658	-1.45354	0.00244442
RSL24D1	-1.26632	0.535326	-0.883768	0.91935	0.695415
PSMA3	-0.984779	0.742971	-1.08703	1.1192	0.209638
KIF1A	-0.76407	1.00612	-0.525669	1.16342	-0.8798
TANK	-1.3708	-0.584647	0.207324	1.19667	0.551454
MAGOHB	1.01906	-0.617039	-0.645839	1.15486	-0.911035
MAP4K5	1.35419	-0.544083	-0.990888	0.750679	-0.569893
CDCA4	1.11078	-0.848948	-0.951997	1.01627	-0.326107
ABHD16A	-0.259584	-0.561103	-0.423751	1.77632	-0.531882
NAA40	0.407371	-0.31336	-0.600658	1.52743	-1.02079
GAS2L3	0.0236948	-0.752078	-0.614956	1.7093	-0.365965
LINC00674	0.990807	-0.393427	-0.716366	1.14191	-1.02293
DNM2	-0.518146	1.7349	-0.378263	-0.0823142	-0.756173
CWC25	-0.883794	0.0739979	-0.423161	1.68285	-0.449888
DCAKD	-0.600318	-0.120552	-0.234381	1.7254	-0.770152
ATP13A3	-0.418598	0.260085	-0.680453	1.63237	-0.793402
C3orf38	-0.650767	-0.271895	-0.112992	1.73305	-0.697392
SOS1	-0.575934	1.52559	-0.452061	0.462793	-0.960387
MAP3K2	-0.850606	0.724071	-0.425903	1.37581	-0.823373
ZFP91	-0.669162	1.29	0.876063	-0.75988	-0.737025
FBXL15	-0.170184	1.67579	-0.348853	-0.14708	-1.00967
CRHR1-IT1	-0.650488	0.82542	-0.61845	1.32056	-0.877039
PKD1P6	-1.16231	1.11728	-0.541464	0.977182	-0.390689
TLDC1	-0.941637	1.40411	-0.339499	0.652304	-0.775273
ZNF138	-0.688234	1.47485	-0.0335242	-1.10677	0.353683
EXOSC3	-0.968948	-0.434561	-0.307463	1.66606	0.0449156
PTPRG	1.50339	0.5481	-0.527778	-0.761857	-0.761857
RPS6KB1	-0.31681	-0.81616	-0.430477	1.73724	-0.173792
XIST	-0.32805	0.83486	1.22338	-1.18288	-0.547306
MRPL15	1.61373	-0.622541	-0.965577	0.18169	-0.207301
TSPAN6	1.34317	0.211508	-0.00664719	-1.46428	-0.0837508
CDC42	-1.38989	0.795116	0.646377	0.687241	-0.73884
VRK3	0.426839	-0.593016	-0.241189	-1.0857	1.49306
GRB2	-1.21418	0.194439	-0.244871	1.53463	-0.270016
EAPP	0.366528	-0.602855	-1.24923	0.0953994	1.39016
DPF2	0.370595	-0.459737	-0.51198	1.56715	-0.96603
CHMP1B	-0.405554	-0.75754	-0.040441	1.72777	-0.524238
QARS	-1.02943	0.979481	-0.87062	1.09242	-0.171853
CTSB	-0.727588	1.06429	-0.733053	1.12607	-0.729723
ATXN3	-0.548431	0.489282	-0.474111	1.51019	-0.976926
NAV1	0.54328	-0.330041	-0.512188	1.43184	-1.13289
MRFAP1L1	0.181597	-0.975247	-0.656066	1.60083	-0.151114
PHF14	-1.29762	0.423197	-0.196684	1.4087	-0.337599
TRA2A	1.28381	-0.122882	0.017398	-1.49531	0.316982
SMARCA5	-0.966808	0.0464751	-0.422654	1.66715	-0.324167
NAE1	1.5675	-1.01221	-0.711442	0.0830998	0.0730547
ANKRD12	-1.29371	0.5121	-0.0578586	1.34395	-0.504482
TXNL1	0.855033	-0.0227847	-0.499839	-1.38344	1.05103
PHF19	1.49976	0.311962	-0.584044	-1.14237	-0.0853055
DDX3X	-1.08511	0.0832847	-0.21059	1.61524	-0.402821
CCNL1	0.926506	-0.447829	-1.42592	0.952768	-0.00552795
DBF4	1.07509	-1.40065	-0.618583	0.307722	0.636419
RBPJ	-0.520126	1.75733	-0.503651	-0.123302	-0.610248
WDR54	0.784167	-0.22573	0.416998	-1.64627	0.670839
AP1M1	1.18466	0.096569	-0.764927	0.708502	-1.22481
GOSR1	1.13084	-0.672213	0.214836	0.662364	-1.33583
WDR45B	1.33386	0.29718	0.33575	-1.19035	-0.776435
G2E3	1.46755	-0.323089	-0.874096	0.550872	-0.821231
FAM127B	0.757723	-0.346907	-0.342319	1.22789	-1.29639
KIAA0101	0.334075	-0.881182	-0.973695	0.0506787	1.47012
NOP58	1.38929	-0.268994	-0.767991	0.644111	-0.996412
YWHAB	0.905371	-0.074101	0.0662266	-1.62511	0.727618
ZNF146	1.22299	0.0280029	-0.485898	-1.37621	0.611118
PCMT1	0.260997	-1.25675	0.397482	1.303	-0.704731
CENPW	1.01877	-0.973774	-0.864991	-0.271716	1.09171
PCM1	1.32847	-0.396765	-0.739817	0.773546	-0.965429
EIF4B	-0.865741	1.1354	0.168798	0.739085	-1.17754
HSPA1B	1.44204	0.368892	-1.27376	-0.174513	-0.362651
LINC00461	1.01982	-0.113127	-0.671495	0.993393	-1.22859
PARP1	-1.5115	0.845018	-0.531928	0.611156	0.587251
MPPED2	0.863183	-1.14926	-0.955384	0.974818	0.26664
BEX1	0.485855	-0.23916	1.35957	-0.270094	-1.33617
ECT2	-1.41771	0.418422	-0.450955	1.2543	0.195944
ATP6V1F	0.0149307	-1.17123	0.374791	-0.653794	1.4353
HNRNPA2B1	0.0327139	1.62091	-0.083977	-1.04232	-0.527328
PPA1	0.137257	-1.35178	1.20841	-0.585826	0.591949
NDUFS7	0.750545	-0.751849	1.33998	-0.369465	-0.969208
UBL5	0.539273	-0.164359	0.457419	-1.66648	0.834144
HINT1	1.31062	0.139258	0.534315	-1.05874	-0.925448
ST13	-0.334131	-1.41593	-0.165251	1.06247	0.852844
NDUFS8	1.2685	-1.33287	0.0909706	-0.563637	0.537033
PGAM1	1.3223	-0.349828	-0.74504	0.766107	-0.993543
CIART	1.74951	-0.224676	-0.232994	-0.645923	-0.645923
ENHO	0.385896	-0.786547	-0.36921	-0.798236	1.5681
CLSTN1	0.620275	-1.02472	1.17974	-1.04829	0.27299
GATAD1	1.51529	-0.535456	0.528479	-0.767687	-0.740631
PARP11	0.203887	-0.744691	-0.681718	1.65812	-0.435602
C12orf45	0.898547	-1.11183	-0.911288	0.0654553	1.05911
GRIP1	0.701726	-0.756082	-0.479646	1.3991	-0.865094
CCDC130	1.58203	-0.857375	0.172815	-0.0428414	-0.854628
BAP1	1.12246	-0.998787	0.426747	0.564109	-1.11453
WDR60	1.37776	-0.887871	0.621146	-0.949493	-0.161545
ABALON	1.75312	-0.240706	-0.238567	-0.650177	-0.623675
RNF216P1	-0.237264	-1.44254	0.597703	-0.1372	1.2193
MCM3	0.536481	-0.730892	-0.922137	-0.364847	1.4814
GPC1	-0.733417	-0.156378	0.221013	-0.923617	1.5924
KDSR	0.261009	-0.3934	-0.415896	1.58827	-1.03998
USP21	1.33865	-0.136666	-0.15708	-1.42211	0.377209
CDK5RAP1	-0.142446	1.24787	0.0360121	0.369964	-1.51141
PIGU	0.748967	-1.34169	0.548004	-0.79544	0.840162
TXLNA	0.7212	-0.7345	0.0989723	-1.25257	1.1669
TAOK3	-1.04672	-0.610399	-0.306308	0.47651	1.48691
METTL17	-0.45349	1.54374	-0.767206	0.459128	-0.782175
RNF130	-0.392892	0.122293	-0.0369625	1.52892	-1.22136
RNF44	0.872151	-0.487923	0.227082	0.869689	-1.481
TBC1D23	-0.0377148	-1.34943	-0.499257	1.21625	0.670153
FBXO11	-1.17726	0.329585	-0.587462	1.4694	-0.0342689
ATAD1	-0.23449	-1.43193	0.64962	-0.18285	1.19965
PTPMT1	-1.12486	1.62203	-0.146079	-0.0737665	-0.277324
TAGLN2	-0.514463	-1.01686	-0.172135	0.0704363	1.63302
DCTN1	-0.796568	1.67941	-0.518708	0.141732	-0.505869
MRPS16	0.068108	-1.55536	1.21949	0.296981	-0.0292244
HLA-A	-0.175136	-0.715932	-1.05834	0.507489	1.44192
MED10	1.03631	-1.62859	0.436324	0.26669	-0.110728
C6orf48	0.288743	-1.14522	0.491821	1.25394	-0.889292
PPAT	-0.281929	-0.713166	-0.33056	-0.438072	1.76373
MRPS17	-0.341255	1.76237	-0.262591	-0.716313	-0.442209
CASP2	0.222425	-0.774108	-0.839275	1.61186	-0.220905
ZDHHC17	-0.546874	1.69534	0.125169	-0.640497	-0.633135
SCAPER	-0.928511	1.47038	0.583693	-0.533392	-0.592165
CELSR3	-0.446384	1.77548	-0.24379	-0.547006	-0.538299
HNRNPAB	-1.39266	0.539163	1.29095	-0.157138	-0.280313
FBXL20	-0.0436559	-0.663068	-0.226499	1.7059	-0.772679
NMT1	0.81893	-0.664206	-0.843975	1.32909	-0.639843
FAF2	-0.979084	0.935342	0.0677063	1.02765	-1.05161
NSD1	-0.784869	0.000836823	-0.273842	1.70142	-0.643548
CCZ1	-0.920331	0.763854	0.255582	1.06832	-1.16743
IMP4	0.865891	-0.789802	-1.28466	0.954839	0.253732
PMPCA	1.69224	-0.526693	0.127454	-0.704639	-0.588359
EIF2AK4	-0.151989	-0.631385	-0.840127	-0.0698855	1.69339
NDUFAF5	1.3872	-0.707386	-0.652701	0.74436	-0.771478
FAM217B	-0.133413	-1.00371	-0.536378	1.63886	0.0346371
MIER1	-0.581167	-1.01812	-0.173399	0.170662	1.60202
C1orf159	0.0984506	-0.754911	-0.444895	1.69435	-0.592999
SNRNP70	0.840749	-0.705023	0.225388	0.977044	-1.33816
CTSC	1.43056	-0.206943	-0.447594	0.451396	-1.22742
EBPL	0.576638	-0.409335	-0.223041	1.341	-1.28526
BNIP2	-0.0894709	-0.542307	-0.500995	1.75072	-0.617951
AMOTL2	-0.34075	-0.913584	-0.469742	1.6813	0.0427761
C1orf35	0.41089	-0.55681	-0.178	1.47287	-1.14895
ACOT13	-0.171809	-1.33208	-0.394666	1.29425	0.604308
SNAPC1	1.17226	-0.412386	-0.0973704	0.723928	-1.38643
YARS2	0.315426	-0.738593	-0.0781622	-1.01883	1.52016
QTRTD1	1.74259	-0.153796	-0.700105	-0.278939	-0.609745
TRIM52-AS1	1.56373	-0.386559	0.205797	-1.14241	-0.240558
ZNF480	1.71271	-0.310072	-0.00950303	-0.696565	-0.696565
COPS5	-0.116956	-0.754393	-0.363436	-0.505724	1.74051
FAM117B	-1.67652	0.979772	0.0431326	0.243501	0.41011
MRPL44	0.11423	-0.92346	-0.407068	1.6638	-0.447497
JTB	0.634859	-1.26968	0.758458	0.775428	-0.899062
RFC1	0.335617	-1.07051	-0.177522	-0.614687	1.5271
TCAF1	-0.171628	-0.66062	-0.0704244	1.70069	-0.798015
AGPAT5	-0.59195	1.77456	-0.356619	-0.286041	-0.539948
SUGT1	0.436527	-0.988441	-0.386082	-0.590118	1.52811
UCHL3	-0.734351	0.950136	0.521239	-1.37217	0.635151
CYFIP2	0.0683978	-0.533446	-0.331472	1.6796	-0.883079
HNRNPA0	-1.32927	0.0742845	-0.191253	-0.033558	1.4798
NUTM2B-AS1	-0.925858	0.65364	-0.446955	1.42193	-0.702762
SUV420H1	0.114254	-0.550545	0.18805	1.46905	-1.22081
CSTB	-0.129605	-1.27336	-0.335006	1.47696	0.261007
SFXN1	1.07852	-0.521493	-0.545109	1.05885	-1.07077
SF3B2	0.0552765	-1.32244	-0.436404	1.4025	0.301069
CYTH2	-1.17674	-0.038073	0.629786	1.30397	-0.718941
NAP1L4	-0.438637	-1.48872	0.549278	0.276698	1.10138
CIR1	1.74426	-0.409072	-0.782313	-0.163803	-0.389071
ARHGEF2	-0.855941	-0.535916	0.0907903	1.68144	-0.380372
DPM3	-0.708588	1.07779	-0.18078	0.974859	-1.16328
SUPT7L	-0.964098	0.387161	-0.6343	1.55027	-0.339034
VTA1	0.460451	-0.249754	1.50261	-0.862939	-0.850364
COTL1	-1.13042	-0.454811	-0.480121	1.30831	0.757044
SMDT1	-1.32907	0.752267	-0.104254	-0.50353	1.18459
SCAF11	-1.09645	-0.273168	-0.64388	1.38192	0.631573
PPP1CA	-0.276383	-0.660301	-0.467146	1.77056	-0.366733
RBM4	-0.320173	-0.995972	-0.772914	1.29558	0.79348
CHMP2A	1.11069	-1.26994	-0.68815	0.0230696	0.824338
PSENEN	0.961294	-0.684112	0.355362	0.751802	-1.38435
C17orf75	-0.0117208	-1.26442	-0.396793	1.4862	0.186742
ZNF280D	-0.689703	0.215331	-0.0798934	-1.01088	1.56515
MRPL9	-1.05134	0.670795	0.570004	0.930421	-1.11988
HADHB	0.311434	-1.01324	-0.646765	1.55426	-0.205687
HNRNPF	-0.394344	-1.2234	-0.449272	0.964002	1.10301
CDCA2	0.542022	-1.05643	-0.775261	1.40559	-0.115921
TMED4	-0.483554	-0.85041	0.0578204	1.69291	-0.416766
MRPS23	0.924174	0.0412368	-0.650435	0.998265	-1.31324
EHMT2	0.319248	-0.45668	-0.414385	1.57313	-1.02131
ABCF1	0.294405	-0.794577	-1.10941	0.190055	1.41953
GID8	-0.755244	-0.162386	-0.1823	1.72578	-0.625849
GIT1	-1.05954	0.336932	1.09209	0.682136	-1.05162
GUK1	0.481511	-1.65989	0.998333	0.0950467	0.0849953
ATCAY	-0.582407	0.0531464	0.0395818	1.5746	-1.08492
MRPL42	-0.082689	1.63463	-0.80315	0.0704363	-0.819228
COA3	-1.71624	0.491435	0.46285	0.773726	-0.0117744
WBP2	0.599889	-0.271818	0.431512	-1.62309	0.863503
CFL2	0.775554	-0.201235	0.595701	0.491718	-1.66174
CARHSP1	-1.65967	0.519057	-0.146246	0.391745	0.895113
RBM17	0.288258	-1.05229	-1.01668	0.581737	1.19897
NCAPG	-0.213093	-0.90318	-0.975375	1.04473	1.04692
ARF5	-0.173204	-1.51362	0.758903	1.04383	-0.115905
IST1	0.743716	-0.293701	-1.29846	1.23499	-0.386552
TXNDC17	1.15679	0.06799	0.0777909	-1.60071	0.298139
CAMLG	1.2694	0.429807	-1.15769	0.327999	-0.869518
ERH	-0.0917565	-1.12119	-0.815394	0.934871	1.09347
UBE2V2	1.11639	0.180207	0.218617	-1.63095	0.115741
TRA2B	0.847978	-0.251352	0.240407	-1.60377	0.766737
GLO1	0.750626	-1.69438	-0.00244109	0.715975	0.230223
TMPO	-1.52983	-0.465392	0.844398	0.391265	0.75956
RBM3	1.47368	-1.29362	-0.168637	-0.256997	0.245573
RSBN1	1.66633	-0.141343	-0.948786	-0.0262222	-0.54998
CENPE	0.995383	-1.29635	-0.604793	-0.0728097	0.978573
SRSF11	0.949319	-1.40881	0.754846	0.352641	-0.647997
MRPL57	1.43054	-1.10833	-0.762902	0.372058	0.0686259
TMEM98	0.11966	-0.584678	0.378757	1.36537	-1.27911
RPS10	-0.893124	0.347286	0.0411712	1.46738	-0.962715
CENPF	0.922465	0.331823	0.370244	-1.70174	0.0772052
FUBP1	0.869993	-0.871396	0.623742	0.663786	-1.28612
EIF4G2	-0.530211	1.78461	-0.402319	-0.493803	-0.358271
SNRPD3	1.12423	-1.22792	-0.866456	0.544176	0.42597
NDUFA13	1.08195	-0.136499	0.979114	-0.969778	-0.954787
HNRNPK	1.45533	-0.394099	-0.771716	-0.882743	0.593228
PFDN5	-0.653619	1.39266	0.736382	-0.773737	-0.701684
RPL29	0.484559	-0.407544	1.25945	-1.4165	0.080033
EEF1G	0.4915	-0.251886	1.35972	-1.33221	-0.267132
SET	1.63474	0.0996698	-0.976139	-0.182441	-0.575825
DNALI1	1.63605	-0.0496202	-0.520448	-1.02383	-0.0421528
AGAP3	1.21525	-0.924253	-0.206422	0.858473	-0.943047
TGOLN2	-1.10292	0.512934	-0.602122	1.44674	-0.254633
ZNF143	0.0961555	-0.419906	-0.472775	-0.88113	1.67766
FAR1	0.229582	-1.18836	-0.37047	-0.205542	1.53479
TXNRD1	1.36822	-0.0847411	-0.546286	-1.24912	0.511927
MRPL32	0.662656	-1.41524	-0.586335	0.270801	1.06812
CHGA	-1.00634	0.687584	0.117414	1.21433	-1.01298
ZNF93	-0.127364	1.01981	-0.572753	-1.29224	0.972545
C1orf27	0.466433	-0.235412	-0.401535	1.41778	-1.24727
TUG1	-0.904914	1.28995	0.00744807	-1.04479	0.652304
SEPHS1	0.121593	-0.541357	-0.199315	1.62498	-1.0059
MRPS11	0.735585	-1.24067	0.42197	-0.890676	0.973796
CLUAP1	-0.576849	1.29145	-0.129158	0.658949	-1.24439
PLEKHM3	-0.702552	0.112175	-0.415987	1.68944	-0.683074
CRB1	-0.79855	-0.145837	-0.615107	1.71427	-0.15478
NCOA3	0.243113	-0.790244	-0.245821	1.60924	-0.816289
RAB9A	-0.695841	1.71494	0.0505902	-0.527238	-0.54245
ETFDH	-0.0818692	-0.978913	-0.817954	1.48762	0.39112
FAXC	-1.37175	0.56902	-0.754095	0.862063	0.694765
MYSM1	-1.24259	0.00875634	-0.482329	0.245443	1.47072
DPH2	-0.704363	0.108449	-0.374843	1.68547	-0.714709
SLC4A2	1.6854	-0.734014	-0.0409756	-0.77501	-0.1354
KCTD10	-0.739554	0.289476	-0.419206	1.62117	-0.751888
FANCD2	-0.480908	-0.992779	-0.0690239	1.66253	-0.119817
ZNF579	-0.504957	1.75788	-0.121444	-0.56574	-0.56574
ALDH16A1	-0.874668	1.72474	-0.291697	-0.377329	-0.181042
ABHD2	-0.067548	-1.2262	-0.700988	1.07147	0.923271
RRAS2	1.77272	-0.514665	-0.499022	-0.21295	-0.546084
SMG1	-1.42125	1.11631	0.545677	-0.571569	0.330829
ERI2	0.142525	-0.735084	-0.563226	1.68564	-0.529852
PHKG2	0.253615	-0.75021	-0.201504	1.59175	-0.893647
BRSK2	1.15293	-0.993889	0.50496	0.445013	-1.10901
BANP	0.723556	-0.727269	-0.466411	1.37951	-0.90938
TTC5	1.75989	-0.195904	-0.343083	-0.637054	-0.583846
OXA1L	1.11825	-1.0454	1.00912	-0.703766	-0.378202
NYNRIN	0.401934	-0.7831	-0.567845	1.58185	-0.632844
ELOVL5	-1.25517	-0.405852	-0.252694	1.38396	0.529747
MON1A	-0.844498	0.366585	-0.248999	1.5522	-0.825291
HUS1	-1.25967	-0.00257709	-0.654291	1.23083	0.685707
WDR81	-0.535904	1.75901	-0.124837	-0.549135	-0.549135
FAM222B	1.76266	-0.369068	-0.195638	-0.621305	-0.576649
DNAJC7	-0.245875	-1.08399	-0.64451	1.43442	0.539956
STRADA	-1.04455	0.133836	-0.0731838	1.58776	-0.603865
CCDC137	-0.247571	-0.984129	-0.801783	0.656314	1.37717
CSNK1D	-0.685575	0.619025	1.47024	-0.701847	-0.701847
MTR	0.611285	-0.583503	-0.520168	1.44912	-0.956732
ANKRA2	0.39261	-1.11457	0.416321	1.24451	-0.938864
ASXL2	1.76802	-0.181155	-0.493311	-0.546777	-0.546777
ROCK2	0.724663	-0.762863	1.38786	-0.50753	-0.842125
ACTN1	-0.780886	-0.476895	0.481738	-0.758625	1.53467
NPC2	-0.979921	0.0770858	-0.599215	1.63042	-0.128372
AREL1	-0.930917	1.53144	-0.140636	-0.80551	0.345621
ADCK1	-0.479286	1.78298	-0.30612	-0.498785	-0.498785
UTP23	-0.831386	-0.0605823	1.60407	-0.8452	0.133096
GCAT	0.610307	-0.778015	0.185806	1.21315	-1.23125
BACH1	-0.721017	0.306881	-0.442166	1.61639	-0.760088
PPP1R18	-1.40306	0.0500942	-0.52109	0.963058	0.910994
SH3GL1	-0.931775	0.735272	-0.161847	-0.939031	1.29738
NAPG	-0.909887	0.880697	-0.255238	1.21247	-0.928038
ZDHHC6	0.904432	-0.971718	0.387158	-1.16907	0.849201
SLC16A14	-0.781227	-0.27135	-0.685412	1.6863	0.0516941
P2RX5-TAX1BP3	1.5324	-0.636649	0.50928	-0.702516	-0.702516
ATF7	0.74177	-0.666282	1.38993	-0.74343	-0.721984
CTSV	0.955221	-0.977904	0.0785572	-1.05836	1.00248
H2AFJ	0.375042	-1.13891	-0.676238	-0.0106889	1.4508
ZNF135	-1.08103	0.672256	0.587114	-1.09387	0.915529
ZNF772	1.46615	-0.483621	0.590215	-0.911706	-0.661034
ZNF793	-0.703093	0.850376	1.31112	-0.729203	-0.729203
ARHGAP11B	-0.394484	-0.657571	-0.660528	1.72497	-0.0123904
BAIAP2-AS1	-0.804663	0.0526742	-0.113612	1.64981	-0.784205
CENPBD1	-0.342181	-0.600458	-0.381055	1.78012	-0.456428
GUSBP3	-1.16517	0.163545	-0.338195	1.56537	-0.225554
HNRNPU-AS1	-1.39124	0.496729	-0.478118	1.25511	0.117523
TMEM206	-1.15864	0.426831	-0.0390274	1.42867	-0.657835
PMS1	1.48386	-0.351092	-0.715137	0.524767	-0.942393
ZNF618	-0.490339	1.75379	-0.10317	-0.580142	-0.580142
NAPEPLD	-1.23883	-0.667154	-0.098116	1.03656	0.967543
ATXN2	1.37572	-0.61015	-0.274617	-1.12274	0.631792
PALM	-1.048	0.259253	-0.363432	1.5857	-0.433521
NUDCD3	-1.07206	0.158146	-0.976456	1.15188	0.738489
TIMM22	1.45764	-1.26551	-0.308988	0.351237	-0.234374
NRN1	-0.923344	0.501528	0.442941	1.15122	-1.17235
SDHA	0.153377	-1.00234	-0.132271	1.60257	-0.621338
MSH2	-0.249722	-0.877455	-0.444591	1.71723	-0.145465
ZNF397	-0.352711	1.58445	0.346316	-0.79419	-0.783864
RBFA	-0.887967	0.166483	0.305159	-1.0174	1.43373
GANAB	-0.846051	0.907121	-0.623917	1.2596	-0.696754
MRPL55	0.496249	-0.997485	-0.0269591	1.40833	-0.880136
TMEM167A	-0.182003	-0.499898	-0.11943	1.70098	-0.899651
RRM2	-0.0657981	-0.601983	-0.598986	-0.478407	1.74517
PHF6	-0.581475	1.71616	-0.588335	-0.605821	0.0594753
TGFBR1	0.197486	-0.990599	-1.01843	0.517385	1.29415
PSMG3	-0.635428	0.683007	-0.369965	1.37381	-1.05143
MED21	1.39603	-0.0397065	-1.125	-0.730944	0.49962
TMEM147	0.452592	-1.23487	-0.370339	-0.280679	1.43329
TFAM	-0.539333	1.61777	-0.614522	0.318817	-0.78273
SESN3	-0.371262	1.78287	-0.575362	-0.380374	-0.455871
ACVR2B	-0.349562	1.72529	-0.816667	-0.0821107	-0.476953
CCNG1	1.00144	-0.42304	0.0927954	0.801133	-1.47232
SLC35B1	0.403557	-1.35932	-0.477644	1.32248	0.11093
NBR1	-1.14568	1.5588	-0.399817	0.214251	-0.227553
HIST2H2AC	0.944099	-0.411854	-0.854877	-0.876999	1.19963
CENPL	0.559885	-0.768078	-0.928811	1.45943	-0.322426
OSBPL2	-0.0466113	-1.13285	-0.537346	1.54834	0.168464
EMD	-0.523539	1.78405	-0.490206	-0.329958	-0.440345
RAP1GDS1	0.105783	-0.772952	-0.472439	1.69203	-0.552427
DCAF10	0.612229	-0.650928	-0.432928	-0.968933	1.44056
ABCA1	-0.777253	1.01447	-0.667695	1.17134	-0.740862
PLAA	-0.383351	-1.05723	-0.6363	1.33317	0.74371
COA7	-0.766631	0.83279	-0.606709	1.32017	-0.779617
KDM1A	-1.02574	0.143402	-0.415294	1.6268	-0.329163
AGRN	-0.833933	0.950571	-0.387912	1.18771	-0.916432
MAPRE3	0.0779722	-0.718162	-0.348441	1.69182	-0.703194
WDFY3	-0.746893	1.6103	-0.420178	-0.757476	0.314243
PPM1K	-0.859349	-0.578393	-0.0212793	1.69443	-0.235414
PEG3	-0.85076	-0.252998	-0.624796	1.6791	0.0494514
GTF3C1	-0.954319	-0.0867503	-0.536759	1.66893	-0.0911048
ATXN2L	-1.00623	0.00685862	0.479509	1.40501	-0.885147
RNF213	-0.941002	-0.269733	-0.505951	0.0483226	1.66836
PRPF39	1.36061	-0.230246	-0.979091	0.67458	-0.825857
RPAP3	-0.972896	0.915911	-0.105068	-0.965494	1.12755
DIP2B	0.826371	-0.546397	1.29422	-1.01569	-0.55851
KRT18	-0.649829	1.60423	-0.671232	0.365126	-0.648298
TRAP1	1.59881	-0.257785	0.0809032	-1.13516	-0.286768
TOP3B	-0.529834	1.75351	-0.096589	-0.563542	-0.563542
IFNAR1	-1.05172	-0.375448	-0.698123	1.00301	1.12229
C6orf89	-0.991305	-0.552818	-0.586654	0.844664	1.28611
VPS52	-0.832418	0.335893	-0.160468	-0.886552	1.54355
ANK3	0.909483	-0.869398	0.174308	0.979915	-1.19431
GSTT1	0.283253	-0.684382	0.473845	-1.30605	1.23333
TMEM179B	1.39632	0.142427	0.391379	-0.880972	-1.04915
C16orf62	0.0154889	-0.770967	0.0104018	1.62308	-0.878
CYR61	0.718602	-0.37753	-0.441831	-1.20277	1.30353
LINC00116	0.314192	-1.37014	-0.564363	1.25331	0.367006
PITPNA-AS1	-0.573972	1.4362	-0.656755	0.657352	-0.86282
CPT2	-0.600614	0.342403	-0.899976	-0.431195	1.58938
RNF11	-1.46042	-0.0260138	-0.35635	0.777186	1.0656
EZH1	-0.548397	1.59605	-0.418175	0.309316	-0.938795
IFT140	-0.637488	1.17917	-0.67278	0.998805	-0.867709
TMED7	-0.801996	-0.132292	-0.66857	1.69802	-0.0951588
C2orf48	-0.0847759	1.73104	-0.388063	-0.793682	-0.464522
LOC100129034	-0.93415	0.795434	0.259935	-1.16055	1.03933
PSMB4	0.767462	-1.00171	0.573363	0.835761	-1.17488
FKTN	-0.695917	1.31395	-0.348574	0.768442	-1.0379
YWHAG	-0.724365	-0.165215	-0.0407975	-0.762315	1.69269
IGF2BP3	1.33769	0.181529	-0.829569	-1.13592	0.44627
HMGXB4	1.42664	-0.572617	-0.156928	0.478863	-1.17596
ANKRD11	-0.78809	0.752504	0.0689568	1.16808	-1.20145
ABT1	1.00989	0.00865554	-0.637061	0.927611	-1.3091
IGFBP5	1.64646	-0.546318	0.258776	-0.694074	-0.664841
METTL18	0.757392	-1.09802	-0.653194	1.3032	-0.309384
JAG1	0.206158	-0.797915	-0.232604	1.62192	-0.79756
NAPB	1.15958	-0.880979	-0.453484	0.998018	-0.823138
ZSWIM1	1.78863	-0.449788	-0.420459	-0.459191	-0.459191
PLTP	0.899104	-0.805714	0.879464	-1.29134	0.318483
ARHGEF9	0.191307	-0.74675	-0.312099	1.64457	-0.777024
ELOVL6	1.57777	-0.639961	0.4213	-0.679555	-0.679555
ZDHHC21	1.28411	-0.672634	0.883678	-0.747576	-0.747576
PCSK9	0.661865	-0.47629	-0.735701	1.42452	-0.874396
MFSD2A	1.76458	-0.524721	-0.156996	-0.541429	-0.541429
UBE2J2	0.927707	-1.01319	0.977575	-1.06218	0.170086
B3GALT6	1.20464	-1.01739	0.599518	-1.04332	0.256546
LRRC17	0.729821	-0.83796	-0.409025	-0.851408	1.36857
TBC1D19	1.44842	-1.25541	-0.231598	0.387846	-0.349258
ZKSCAN5	0.424139	-1.02707	0.431662	-1.04667	1.21794
IPMK	1.52171	-0.66036	-0.656481	0.528585	-0.733454
PCBP3	-0.147727	-0.547783	-0.510153	1.7628	-0.557135
TBK1	0.177292	-0.668531	-0.557969	1.67784	-0.628628
ERI1	-0.465903	-0.876959	-0.504791	1.64914	0.198515
TMEM184C	0.895779	-0.801839	1.26288	-0.538228	-0.818589
VAC14	0.466076	-0.669866	-0.637083	-0.714166	1.55504
NAA30	1.62495	-1.06933	-0.325031	-0.32005	0.089465
TLN2	0.157586	-1.00072	1.32413	0.502719	-0.983711
THOC5	0.99071	-0.940192	0.0504908	0.980729	-1.08174
ZFP2	1.78805	-0.453032	-0.396506	-0.469258	-0.469258
CDC6	0.0820943	-0.573467	-0.556412	1.70835	-0.660565
STAT3	-0.246951	-0.797674	-0.483169	1.73914	-0.211347
CCDC43	-0.207657	-0.711411	-0.517541	1.75537	-0.318758
ANGEL1	1.78817	-0.404509	-0.440695	-0.471485	-0.471485
CHAF1B	0.372011	-0.651872	-0.656891	1.60116	-0.664411
PPT2	1.10593	-0.667512	-0.72571	1.08265	-0.795349
IMPA2	0.39432	-0.860568	-0.164055	-0.884511	1.51481
PCGF6	0.581352	-0.758486	-0.533983	-0.773323	1.48444
C6orf52	1.74155	-0.545693	-0.0403557	-0.577751	-0.577751
ZNF546	0.611545	-0.664843	1.47449	-0.710594	-0.710594
C20orf196	0.694637	-0.790471	-0.544622	1.4136	-0.773146
CXorf56	0.658903	-1.29586	-0.363981	1.29204	-0.291105
DGCR14	1.58522	-0.944921	-0.328568	0.311924	-0.623656
HSD17B7P2	0.526406	-0.769956	-0.502541	1.51304	-0.766953
LOC374443	-0.101943	-0.922426	0.593443	1.376	-0.945079
MEF2BNB	-0.1339	-0.709848	-0.165623	1.7174	-0.708026
TARSL2	1.78599	-0.505803	-0.412894	-0.37113	-0.496164
TMPO-AS1	1.07933	-0.696097	1.11091	-0.755459	-0.738684
URB1-AS1	1.45564	-0.435064	0.606612	-0.813592	-0.813592
UQCRC2	-0.972314	0.756229	1.06995	-1.12457	0.270707
CADM1	0.39468	-0.971965	-0.539639	1.55459	-0.437667
ECI2	0.504452	-1.12967	-0.254967	1.44433	-0.564144
MRPS18B	-1.39964	1.09375	-0.616118	0.60257	0.319436
ACVR2A	1.38947	-0.636207	0.618716	-1.09868	-0.273299
MID1	0.0132879	-0.861866	-0.420769	1.70106	-0.431708
CASP6	-1.01464	0.0818182	-1.02327	0.935811	1.02028
ATP6V1B2	1.57217	-0.480709	-0.618292	0.397051	-0.870217
MVD	-0.906724	0.198331	0.697778	1.15673	-1.14612
SHISA5	-0.286859	-0.972601	-0.153211	1.69387	-0.281203
ARHGDIA	-0.686124	1.60133	-0.68383	0.369383	-0.600759
CCNH	0.799498	-0.500399	-1.07563	1.29709	-0.520564
NOVA1	0.0793187	-0.649933	0.595739	1.25552	-1.28065
NME4	-1.50857	-0.491837	0.373774	0.91244	0.71419
TCEB1	-1.5825	0.368164	-0.054937	1.1598	0.109472
SAYSD1	1.69064	0.0794251	-0.527934	-0.414569	-0.82756
RNF145	-0.908982	0.775841	-0.154442	1.2633	-0.975721
NARFL	-0.350332	0.382424	-0.603197	1.55127	-0.980167
PDE6D	0.234531	-0.40681	0.00922628	1.45377	-1.29072
SNX27	-0.948206	-0.462711	0.0456039	1.67076	-0.305444
KHDRBS1	0.594668	-0.604421	0.841345	0.639527	-1.47112
SHISA2	-0.835608	0.979682	1.18424	-0.494825	-0.833489
KMT2A	-0.665014	0.749924	-0.147915	1.25042	-1.18741
ZNF652	1.35345	-0.073056	-0.465133	-1.30601	0.490747
AES	-1.40965	-0.466732	0.919542	0.974262	-0.0174221
PIM3	0.354512	-0.693214	0.842729	0.878596	-1.38262
FYTTD1	-0.587936	-1.07354	-0.436329	1.28458	0.813224
PLEKHB2	-0.874787	1.13762	-0.481093	1.02709	-0.808829
ANP32B	-1.38791	-0.0258242	1.01514	0.893235	-0.494637
CLIC4	0.446864	-0.94324	-0.0633748	1.45247	-0.892715
SSBP1	1.55368	0.112424	-0.937264	-0.827763	0.0989236
SMARCC1	-0.52408	1.52289	-0.37791	-1.04209	0.421189
ATXN10	0.502643	-0.478659	0.486321	1.00014	-1.51045
MLLT4	-0.699082	1.15311	0.594624	0.275113	-1.32377
MEX3A	0.617752	-0.410296	0.106215	1.145	-1.45867
TTK	1.04828	0.34038	0.301963	-1.6406	-0.0500287
UQCRC1	1.09653	0.238592	0.383743	-1.60649	-0.112369
FOXG1	-0.940209	1.63303	-0.167207	0.113432	-0.639049
BCL11B	-0.371635	1.55789	0.399579	-0.698665	-0.88717
NDUFA6	-0.0238607	-0.876736	-0.289693	-0.50904	1.69933
FBLN1	-0.430871	-1.36691	0.164261	0.276047	1.35747
CCT8	0.917134	-0.173687	-0.823752	1.14625	-1.06595
PPP2R1A	0.0339931	-1.63356	0.0425583	1.01972	0.537288
KIF20B	0.629457	-0.981532	-0.548105	1.43365	-0.533474
PARP15	-0.729981	0.36262	-0.440068	1.59031	-0.782879
DARS	0.448795	-0.427544	-0.630778	-0.926526	1.53605
RPL35	1.42588	-0.501685	0.602129	-1.06959	-0.456736
UBE2C	1.04057	0.641465	0.394285	-1.35019	-0.726134
SEC62	-0.21109	1.5134	-1.24569	-0.264651	0.208024
SSR2	-1.73588	0.0415089	0.459845	0.541315	0.693206
FDPS	-0.653566	0.0226483	-0.468893	1.72202	-0.622206
DNAJA1	1.3151	-0.323303	-1.35949	-0.169832	0.537523
C4orf48	-1.32762	0.135178	0.65429	-0.638184	1.17634
TBCB	-0.990253	0.480456	-0.148163	-0.800213	1.45817
HDAC2	-0.0989583	1.27136	0.246588	0.0986801	-1.51767
CIRBP	-0.416231	-0.987108	-0.273716	0.0105212	1.66653
GABARAPL2	-1.22365	0.34152	0.648923	-0.867715	1.10092
HSBP1	0.830123	-0.774693	1.03002	-1.27098	0.18553
CDKN3	1.15246	-0.326999	0.521831	-1.50581	0.158524
PPIA	0.628446	-0.157666	0.654735	-1.68484	0.559323
CCNB1	-0.181118	1.41475	0.465373	-1.24052	-0.458486
ACP1	-0.388196	1.35891	-0.667928	0.717719	-1.0205
MIS18BP1	1.34246	0.427123	-0.443812	-1.34829	0.0225231
AP2M1	0.478936	-1.75355	0.188331	0.730493	0.355792
HMGA1	0.892653	0.0258635	-0.840837	1.07751	-1.15519
DPY30	-0.794926	1.17894	0.0785416	0.734394	-1.19695
SRSF7	1.54584	0.398681	-0.293466	-0.859577	-0.791478
CBX5	1.68955	0.105184	-0.39755	-0.687485	-0.709699
ATP5J2	0.766686	-0.900814	0.693011	-1.27047	0.71159
C14orf2	1.53426	0.106011	-0.317011	-1.23557	-0.0876918
HIST1H4C	0.535258	-0.0637095	0.709681	-1.71047	0.529238
HMGB3	0.644935	1.33197	-0.137581	-0.696715	-1.14261
NDUFC2	-1.22033	0.398457	0.557426	1.13381	-0.86936
MGA	-0.0645384	-0.944392	1.56289	0.226951	-0.780912
[truncated: 6,975 more rows]

## Sheet: macaque vRG
	E40	E50	E70	E80	E90
RPS4Y1	1.64247	-0.647563	-0.647563	0.275391	-0.622729
DDX3Y	1.61434	-0.652311	-0.652311	0.342588	-0.652311
ENSMMUG00000062648	0.685028	-0.70591	1.42867	-0.689961	-0.717829
MT-CO1	1.76021	-0.177995	-0.58694	-0.62048	-0.374798
ENSMMUG00000061125	1.73384	-0.390605	-0.8225	-0.381095	-0.139636
TTR	1.78865	-0.45582	-0.45582	-0.45582	-0.421193
RPS4Y2	1.57233	-0.666262	-0.664675	0.432897	-0.674293
EIF1AY	1.61413	-0.631413	-0.653708	0.342672	-0.671678
ZFY	1.7442	-0.557165	-0.562574	-0.0516098	-0.572856
CCND1	1.75153	-0.378242	-0.637503	-0.60453	-0.131251
HBB	1.74776	-0.0799563	-0.632744	-0.555606	-0.479454
NLGN4Y	1.49503	-0.708602	-0.581897	0.56977	-0.774298
IGF2	1.7808	-0.388304	-0.54314	-0.319211	-0.530149
FUS	0.743516	-1.50732	0.62205	0.694648	-0.552895
ENSMMUG00000052127	1.19368	-0.811501	0.766738	-1.15269	0.00376575
RPS2	1.16118	-1.51405	-0.325125	0.448019	0.229972
SHOX2	1.78457	-0.326411	-0.483537	-0.487313	-0.487313
MT-CO3	-1.18955	-0.611461	0.238267	0.0982807	1.46446
MT-CO2	-0.306402	-0.941352	-0.0591055	-0.386412	1.69327
ZIC4	1.77767	-0.25161	-0.494439	-0.51581	-0.51581
TUBB	-0.876864	0.427127	1.19271	0.450131	-1.1931
HMGB2	-1.19674	0.61888	-0.664509	1.31814	-0.0757738
TCF7L2	1.77909	-0.26883	-0.540625	-0.494342	-0.475297
MT-ND3	-1.33192	0.120507	-0.0765326	-0.185551	1.47349
OTX2	1.74485	-0.0544712	-0.566464	-0.566152	-0.557768
RPS9	0.0822149	-1.71858	0.852333	0.337738	0.446296
WLS	1.72446	-0.375139	-0.764259	-0.54775	-0.0373096
ENSMMUG00000037977	-0.470955	-1.46925	1.06286	0.667784	0.209559
ENSMMUG00000065373	1.70862	0.0142641	-0.71861	-0.674976	-0.329294
NFIB	-1.54592	0.0862752	0.687286	1.03118	-0.258819
ZIC3	1.76025	-0.132687	-0.555075	-0.555075	-0.51741
RPS4X	-1.12478	-0.367703	1.57818	0.186676	-0.272372
HDGFL2	0.24365	-1.42791	1.33401	-0.31038	0.160627
ENSMMUG00000061824	-1.59055	0.440905	0.682551	0.825493	-0.358402
ENSMMUG00000053116	1.55022	0.449941	-0.814623	-0.47441	-0.711127
NES	1.72951	-0.0125375	-0.703822	-0.510357	-0.502794
ENSMMUG00000017466	-1.73611	0.539594	0.752505	0.344308	0.0997054
TRIR	-1.42941	1.17448	-0.398261	0.00611364	0.647078
CDKN1B	-1.69937	0.466069	0.612606	0.714704	-0.0940112
RPS18	-0.285631	-1.25435	1.38446	0.533942	-0.378421
PBX3	1.52921	0.495753	-0.844776	-0.536842	-0.643348
NFIA	-1.35388	-0.385076	-0.240015	1.02792	0.951048
LIX1	1.74312	-0.087785	-0.387553	-0.63304	-0.634741
SGTA	0.0455783	-1.72894	0.75769	0.518257	0.407419
ZIC2	1.73786	-0.732023	-0.582584	-0.298264	-0.124988
ENSMMUG00000065362	0.654186	-0.132607	-1.06532	-0.793899	1.33764
HSP90AA1	1.38321	-0.183598	0.364799	-1.37223	-0.192187
RPS8	-1.34804	1.11377	-0.54731	0.801464	-0.01988
DNAJB1	1.5913	0.279001	-0.24324	-0.873162	-0.753895
MPPED2	-1.36644	0.31664	1.19189	0.477534	-0.619627
INCENP	0.952177	-1.16761	1.07733	-0.745568	-0.116325
RABL6	0.469742	-0.988968	1.51242	-0.598194	-0.395002
FABP7	-1.31774	-0.835045	0.673732	0.835811	0.643243
IGFBP2	1.74885	-0.306063	-0.444952	-0.77464	-0.223191
DDX3X	-1.48821	1.30918	0.230287	-0.117608	0.0663568
ENSMMUG00000054358	1.55544	-0.42369	0.364342	-1.0212	-0.474891
TENM3	1.72899	0.00813862	-0.592888	-0.525342	-0.618897
CDK5R1	-0.675337	0.676876	1.22784	0.0265939	-1.25597
RPS6	-1.6624	0.550782	0.0831709	0.959914	0.0685371
GPX4	-0.141064	-1.24602	1.00553	-0.628878	1.01043
ENSMMUG00000041076	1.58347	0.249493	-0.250591	-1.03164	-0.550731
ENSMMUG00000039070	-0.131576	-1.54166	1.07949	0.660482	-0.0667386
SRRM2	1.49338	-0.534274	0.548106	-0.908719	-0.598489
SLC6A1	-1.19025	0.337186	-0.878452	0.550414	1.1811
PAM	1.75865	-0.328512	-0.753116	-0.30074	-0.376285
CCNI	-1.18847	-0.29387	-0.0931713	1.57876	-0.0032458
CLTA	-0.971571	1.52624	0.248265	0.0124517	-0.815385
GNB2	-0.336102	-1.31497	1.41976	-0.124562	0.355878
BUB3	-0.859006	0.913972	1.2531	-0.631633	-0.676429
ZIC1	1.6565	0.234373	-0.684549	-0.652422	-0.553904
CSNK1G2	1.34044	-1.40955	0.28622	0.126931	-0.344032
SNRNP70	0.18828	-1.64111	1.08053	0.317425	0.0548781
CBX3	-0.478163	1.67127	0.146955	-0.498686	-0.84138
ENSMMUG00000017966	-1.46214	0.0793668	0.00262761	0.0179781	1.36217
TIGAR	-1.11564	0.244284	-0.087519	1.53497	-0.576091
DOK5	-1.41391	-0.483371	0.606527	1.17751	0.113243
RAD21	-0.953647	0.794649	-0.861912	1.28346	-0.262549
RPL18	-0.312691	-1.15829	1.54945	0.240671	-0.319143
EIF1AX	-1.35442	0.506458	-0.432719	-0.0311247	1.31181
SPATS2L	1.59612	-0.424468	-1.01421	-0.418724	0.261285
GAPDH	0.973344	-0.44956	1.16499	-1.02786	-0.660911
CXCR4	1.73215	-0.183701	-0.848092	-0.323666	-0.376689
EFNA2	1.7124	-0.213382	-0.171153	-0.899786	-0.428077
CNOT3	0.933028	-1.29245	1.04448	-0.0842287	-0.600829
NR2F1	0.95124	-0.486725	1.20427	-0.746245	-0.922544
NEUROD6	-0.395854	0.501161	1.5106	-0.759757	-0.85615
TTYH1	1.62362	-0.289864	-0.790523	-0.775277	0.23204
CETN3	-0.487551	1.26416	-0.94842	0.876454	-0.704643
HBA2	1.06792	-0.850793	-0.904074	1.07914	-0.39219
ENSMMUG00000018687	0.904026	-0.810841	-1.32074	0.730976	0.496579
RPS14	0.0405743	-1.4992	1.02946	0.761788	-0.33263
ENSMMUG00000019832	-1.43576	0.398145	-0.29314	0.0294925	1.30126
JUN	0.751804	-0.306999	-0.581121	-1.15527	1.29159
CEP170	-1.50595	0.988425	0.236812	-0.433946	0.714659
RPL23A	-1.07383	-0.223534	-0.72813	0.684552	1.34094
PDPN	1.6616	-0.784482	-0.540371	0.202407	-0.539158
NELL2	1.7641	-0.222559	-0.385344	-0.474314	-0.681881
MT1M	-1.38896	-0.57662	0.258396	0.526254	1.18093
SEZ6	-0.85298	-0.478671	1.66693	0.155205	-0.490479
ENSMMUG00000056838	-1.52011	0.895015	-0.333015	0.0801093	0.878003
RPL37A	-1.2344	-0.30425	0.939165	1.11275	-0.513265
YPEL3	-1.55008	-0.397437	0.943781	0.352128	0.651604
TNIK	1.30012	-0.772735	-0.992958	-0.323191	0.788759
RNASEH2B	-0.767786	0.864972	-1.00469	1.24151	-0.334005
PTOV1	0.0453241	-1.10169	1.61976	-0.31231	-0.251085
RPS24	-0.914054	0.413105	1.40625	0.0980521	-1.00335
KHDRBS1	-0.84541	1.14607	0.649368	0.266216	-1.21625
HMGA1	1.43471	0.643428	-0.459576	-0.752232	-0.866333
ENSMMUG00000059607	-0.97881	0.619366	1.3342	-0.0384039	-0.936352
ZBTB18	-0.992819	-0.170165	1.54042	0.331493	-0.708927
ENSMMUG00000050829	0.734118	-1.0691	0.775057	-1.12019	0.680115
ENSMMUG00000028695	-0.235729	-0.882653	-0.663292	0.136444	1.64523
CARM1	1.47238	-1.00689	0.304551	0.0781363	-0.848183
NFIX	-1.05054	-0.581126	1.06286	-0.511592	1.0804
KRT10	0.863982	-1.35646	-0.314476	1.10671	-0.299755
INHBB	-1.37257	-0.366803	-0.154153	1.234	0.659528
SEPTIN2	0.61451	-0.809346	-1.28284	0.39981	1.07787
TUBB2B	-0.729962	-1.3385	0.409603	1.08625	0.572608
SRSF9	1.53049	-0.993827	0.249361	-0.00648812	-0.779538
RCOR2	1.08601	-0.227964	1.01095	-0.935151	-0.933851
FEZF2	0.0111898	1.50824	-0.0156869	-0.206806	-1.29694
ENSMMUG00000062894	-0.5849	0.826381	-0.665289	-0.893214	1.31702
PHF1	0.970911	-1.3538	0.681182	0.449209	-0.747502
HSD17B11	-1.51109	-0.371217	0.793075	0.122344	0.966887
SVIP	-1.58224	0.0816759	0.676901	1.00023	-0.176566
TCF4	-1.35621	-0.221648	1.44547	-0.0157308	0.148123
ENSMMUG00000049855	-0.852974	-0.429433	1.70038	0.0248562	-0.442833
EPB41	1.68513	0.0965766	-0.346913	-0.691428	-0.743365
RPS11	-1.28989	0.0395018	1.39873	0.354307	-0.50265
CDK19	-0.0678244	1.62021	-0.167828	-0.254286	-1.13027
BCL11A	-0.326661	1.11244	0.9019	-0.386553	-1.30112
D2HGDH	1.28277	-1.50325	0.293282	-0.0915553	0.018755
RPS29	-1.12827	-0.183336	-0.732837	0.839932	1.20451
BASP1	0.0869601	-0.833276	1.68421	-0.573124	-0.364769
LRRN1	1.47136	-0.284375	0.526183	-0.926899	-0.786269
FLRT3	1.27037	-0.0953859	0.729245	-0.825169	-1.07906
DMRTA2	-1.00987	-0.034325	1.65841	-0.16562	-0.448592
EIF3G	0.234522	-1.30323	1.44086	-0.411077	0.0389294
FOXG1	-0.335278	0.566245	1.44553	-0.64844	-1.02806
CDKN2C	-1.10902	-0.349601	-0.579295	0.675662	1.36226
COX20	-1.1694	-0.367032	-0.547343	0.925358	1.15841
MTUS1	-1.77044	0.206541	0.568792	0.543571	0.451537
MAP2	-0.208423	1.21739	0.853133	-0.850476	-1.01162
BRSK2	0.656554	-0.335434	1.40053	-0.780491	-0.941157
MLLT11	-0.782547	0.241906	1.63623	-0.387055	-0.708539
EVL	0.105232	-1.10654	1.45286	0.299469	-0.751012
DBI	-0.899458	-0.434943	-0.278109	-0.0949556	1.70747
GPR137	0.825065	-1.16478	1.11088	0.0787301	-0.849895
ARHGEF2	-1.17693	-0.0235652	1.44401	0.377975	-0.621486
GOLGA7	-1.78057	0.469229	0.372152	0.591815	0.34737
SALL2	1.6128	-0.192209	-1.11067	0.0454285	-0.355352
RGMA	1.10112	-0.434028	-1.46155	0.125695	0.668753
ENSMMUG00000032410	-1.43227	0.766714	0.844967	0.47185	-0.651259
PTPRF	1.77206	-0.587695	-0.221247	-0.452692	-0.510427
TOX	0.47046	-1.78593	0.425395	0.522578	0.367502
ENSMMUG00000058037	-1.19649	1.19689	0.00486439	0.750967	-0.756235
HMGN3	-1.54096	0.104131	1.1703	0.456904	-0.190373
DHPS	-1.22864	0.19844	1.23156	0.575355	-0.776714
MEIS2	-1.27658	0.0863778	1.50333	0.00752888	-0.320662
NOP53	1.18145	-0.657419	0.96605	-0.491506	-0.998574
TBR1	-0.489624	0.564685	1.27589	-0.00428954	-1.34666
CEP70	-1.51636	1.00734	-0.274062	0.00153792	0.781547
TMSB10	-0.922463	-0.196166	1.70333	-0.153956	-0.430746
GNG3	0.678381	-1.05446	1.37042	-0.330604	-0.663742
NMNAT3	-0.523648	0.625469	-1.47331	0.351509	1.01998
CALCOCO2	1.502	0.552781	-0.609102	-0.616931	-0.828747
SLC38A1	1.43457	0.497698	-0.0966003	-0.909952	-0.925718
SALL1	-1.29048	0.0221363	-0.665354	1.07146	0.862239
CEMIP2	1.13276	-0.0679145	-1.51141	0.628355	-0.181798
CEP76	1.7571	-0.158372	-0.441755	-0.471068	-0.685905
DYNC1I2	-0.800894	1.05185	-1.0718	1.02951	-0.20867
ENSMMUG00000016898	-1.66395	-0.0416709	0.482427	0.258972	0.964223
NSG2	-0.679213	-0.15916	1.7036	-0.0885371	-0.77669
ENSMMUG00000003234	0.0144632	-1.54304	0.296066	1.2374	-0.00488761
NOVA1	1.03067	-0.400535	-1.18796	-0.499055	1.05688
LLPH	-0.616251	1.51293	-0.529702	0.51771	-0.884687
RALY	0.00441594	-1.31924	1.49653	-0.0492043	-0.132509
AMDHD1	-0.483171	1.28546	-0.143667	0.639348	-1.29797
RPLP2	0.198378	-0.987206	1.27729	0.541671	-1.03014
MRPL51	-1.24606	0.87078	-0.875208	0.359502	0.890983
PAX6	-1.39319	-0.479265	0.532513	1.23919	0.100758
ATP5PB	-1.5645	0.590778	1.09361	-0.0511687	-0.068726
ENY2	-0.485875	1.48899	-0.665642	0.554729	-0.892204
RPL32	-1.51197	-0.00217386	0.238798	1.28716	-0.0118163
ENC1	-0.847019	-0.320393	1.69327	0.0324252	-0.558286
NIN	1.55122	0.336192	-0.860793	-0.839463	-0.187156
PNISR	1.72003	-0.103836	-0.248656	-0.553712	-0.813821
TGIF1	-1.38758	0.313994	1.16793	0.503976	-0.598318
NCAPG	-0.381699	1.57213	-0.551625	-0.980613	0.341812
TCEAL4	-1.41475	0.385709	-0.561284	0.427662	1.16266
PTTG1	-1.1026	0.374147	-0.197944	1.50627	-0.579874
LSM5	-0.753563	0.688517	-1.20013	1.23152	0.0336485
LANCL1	-1.35623	0.277454	0.0172505	1.40253	-0.341001
MAT2A	-1.17675	1.18883	-0.0121897	-0.775123	0.775228
EZR	-0.646082	0.121227	1.59504	-0.0601834	-1.01
KPNA4	1.58329	0.138555	-0.457059	-1.1147	-0.150084
ENSMMUG00000060287	-1.4991	0.299676	1.14446	0.446759	-0.391802
SMDT1	1.39534	-0.735751	-0.986715	0.655794	-0.328669
ZNF322	1.61285	0.273742	-0.453991	-0.502426	-0.930177
SFRP1	-0.0378388	1.19635	0.404853	-0.0131314	-1.55024
MIS18BP1	-0.506526	1.20641	-1.34583	-0.0431826	0.689123
TMEM123	-0.174652	1.50191	-1.00825	-0.727977	0.408973
PSMD3	-0.10032	-1.7039	0.627483	0.571352	0.605384
ENSMMUG00000063637	-0.820924	0.348753	1.43056	0.11187	-1.07026
HDGF	-0.216168	1.33178	-1.45584	0.136158	0.204072
SSBP3	1.42709	0.551785	-0.304618	-0.550245	-1.12401
MT-ND1	-1.12607	-0.529827	-0.188196	0.323917	1.52017
MRPL23	0.457339	-1.2168	1.2947	-0.762979	0.227743
DLX1	-0.155374	0.899943	-1.59479	0.0637618	0.786464
CDKN3	-1.4826	0.272903	-0.255818	1.27503	0.190489
MAZ	-1.71028	0.5252	0.586366	-0.0721585	0.670873
EMX2	-1.42262	0.790901	1.0484	0.0785894	-0.495273
MT-ND4	1.08272	0.396521	-0.874519	-1.23049	0.625766
CTNNB1	1.63826	0.0586199	-0.956705	-0.121625	-0.618547
ENSMMUG00000029973	0.230948	-0.770677	-1.29041	0.834883	0.995255
VRK1	-0.897721	1.69416	-0.117535	-0.539018	-0.139885
EMD	0.705051	-1.49716	-0.10875	1.09997	-0.199105
DYNC2H1	-0.634611	1.3011	-1.01865	0.810411	-0.458246
PCBP4	1.28519	-7.83148e-05	0.604617	-0.63087	-1.25886
COL4A2	1.52193	-0.00308495	-0.38213	0.0993367	-1.23605
EIF4A2	1.56392	-1.00139	-0.217427	-0.644006	0.298898
NUF2	-1.03235	0.329989	-1.06851	1.12589	0.644988
KAT6B	-1.15927	1.31461	0.506296	-0.806574	0.144934
PAIP1	-0.3164	1.63168	0.0907691	-0.356038	-1.05001
TMA7	-1.59648	0.0356878	0.10176	1.16266	0.296381
ARID1A	1.53687	-0.00578621	-1.17756	-0.484051	0.130531
MID1IP1	-1.24256	0.0428435	1.5198	0.0558003	-0.375881
SLC39A3	-0.18293	-1.36257	1.33632	0.493378	-0.284194
ENSMMUG00000030448	-1.27151	0.224904	-0.547131	1.41465	0.179087
RHEB	-1.51447	-0.317151	0.260798	1.17531	0.395508
LRCH4	1.18207	-1.20792	0.237929	0.623531	-0.835611
MRPS21	-1.45574	0.206355	-0.0748225	-0.029237	1.35344
PIK3C2B	1.73377	-0.0233562	-0.513859	-0.515858	-0.680695
RUNX1T1	1.65366	0.154107	-0.391627	-0.914915	-0.501223
RHOQ	1.60799	-0.112665	-1.15454	-0.0974595	-0.243332
ENSMMUG00000058708	-0.413706	1.63044	0.218275	-0.501594	-0.933417
ENSMMUG00000064551	-0.268983	1.43722	0.559041	-1.0336	-0.693683
CYBRD1	-1.31369	-0.610753	0.0219424	0.737959	1.16454
ENSMMUG00000059961	-0.825722	0.97408	1.17383	-0.418842	-0.903349
PPDPF	0.261715	-1.11166	-0.852517	1.36101	0.341447
RPL6	-0.592784	1.62146	0.262202	-0.403009	-0.887868
PTP4A1	-1.24526	0.957524	1.04127	-0.663395	-0.0901371
MSL1	1.68002	0.0669694	-0.355808	-0.894004	-0.497182
ENSMMUG00000055860	-0.531044	0.404677	-1.44606	0.449404	1.12302
DLX2	-0.381803	0.472045	-1.48322	0.216245	1.17673
HPCAL1	-0.724824	0.264975	1.56228	-0.129309	-0.973124
SLF1	1.54202	-0.552625	0.210578	-0.0744111	-1.12556
GTF3C1	1.22461	-0.949516	0.929038	-0.675099	-0.529034
ENSMMUG00000044916	-1.55669	0.234366	0.276184	-0.147128	1.19326
IGF2BP2	1.40325	0.720318	-0.633653	-0.76244	-0.727471
GNG2	-1.26355	0.835301	-0.130358	1.15472	-0.596115
ARHGEF12	1.6068	0.0150319	-0.99128	-0.659183	0.028634
GUCA1B	-1.06765	0.256156	-0.914414	0.378717	1.34719
BEX1	-1.69557	0.185118	0.906395	0.510335	0.093721
AKT1	0.674706	-1.22094	0.575169	0.913659	-0.94259
HSPA4L	1.65326	-0.0908749	-0.0301377	-0.970641	-0.56161
SAT1	-1.27244	-0.456856	1.11954	0.910231	-0.300476
UCP2	0.10399	-1.49307	-0.154545	1.29366	0.249967
CYC1	-0.0392463	-1.34615	1.41915	0.276198	-0.309955
ENSMMUG00000061548	1.1718	-0.563685	-1.04913	-0.524892	0.965902
H2AX	-0.495954	-1.22914	-0.283023	1.27505	0.733068
RBM8A	-0.623668	1.69965	-0.81091	-0.25406	-0.0110074
ANO6	1.65205	-0.150951	0.0715471	-0.73049	-0.842152
SMARCA2	-1.01061	-0.212859	-0.857048	1.1717	0.908818
SUB1	-0.968146	-0.239257	-0.835741	0.690086	1.35306
FZD2	1.36964	-0.453504	0.56537	-0.240086	-1.24142
AMFR	0.671364	-1.35323	-0.780861	0.592606	0.870121
SRSF4	1.7631	-0.165823	-0.442568	-0.55075	-0.603964
COX7C	-1.13524	0.882267	-0.98073	0.940877	0.292829
ENSMMUG00000063288	-0.445294	1.56129	-1.10739	-0.266735	0.258124
TCEAL5	-1.6591	0.745334	-0.110038	0.232908	0.790895
SLC6A8	1.68646	-0.621442	-0.851477	-0.211254	-0.00229137
ARL4A	1.47364	-0.138398	-1.25521	-0.3795	0.299467
TBCB	-0.380964	-1.34437	0.857227	1.11812	-0.25002
CORO2B	-1.45215	0.866966	0.561322	-0.630042	0.653905
ENSMMUG00000060576	1.29573	-0.740286	0.154635	0.510126	-1.22021
PIN4	-1.78707	0.448854	0.439502	0.512248	0.386464
ENSMMUG00000049324	-0.936675	-0.21336	-0.906766	1.29267	0.764132
TMEM259	0.163892	-1.64655	1.07332	0.090164	0.319173
PARP2	-1.52685	1.15796	0.544292	-0.177782	0.00238012
CNBP	-0.85733	1.20221	0.971913	-0.594839	-0.721956
ENSMMUG00000065180	-1.09896	-0.261161	0.0133267	-0.279746	1.62654
HIPK2	1.68804	0.0934417	-0.368308	-0.768213	-0.644964
PDCD7	0.81621	-1.26941	-0.813372	0.273614	0.992958
AGRN	1.67681	-0.938599	-0.31628	0.032256	-0.454182
DCBLD2	1.63723	0.202414	-0.508028	-0.407121	-0.92449
GAD2	-0.282919	0.46067	-1.59538	0.428062	0.989571
ZNF219	1.65954	0.204354	-0.774548	-0.618501	-0.470846
GNG12	-1.04389	-0.533277	-0.182538	0.157241	1.60246
BSCL2	0.672619	-1.44044	0.921935	0.475611	-0.62973
ATP6V1G1	0.0346882	1.272	0.657588	-0.884163	-1.08011
ASB3	-1.33723	0.443373	1.2377	0.288632	-0.632481
FAM234A	-0.0788796	-1.17488	-0.333054	0.00488951	1.58192
PRMT2	0.164387	-1.63227	1.01282	0.526965	-0.0718968
SLC16A1	1.34804	-0.105007	-0.0339311	-1.45298	0.243877
NDRG4	-1.25147	-0.51925	1.21	0.801364	-0.240643
DLX5	-0.474927	0.344653	-1.50995	0.696573	0.943655
LMNB2	0.179797	-1.23852	1.42088	0.236809	-0.598966
PRRC1	-1.08751	1.53894	-0.00151925	-0.641952	0.192044
CORO1C	-1.67607	-0.12756	0.521721	0.841804	0.440106
BTG3	-1.4084	-0.49384	0.607807	1.17887	0.115568
AMPH	1.59867	0.0215421	-0.312549	-0.158292	-1.14937
ACTN4	-0.103508	-0.90678	-0.828929	0.291695	1.54752
VPS37B	1.10385	-1.01986	0.00628606	0.886875	-0.977147
DUSP16	1.47841	-0.992217	0.391483	-0.0571392	-0.820538
AKT3	-0.207587	0.743878	1.30594	-0.896839	-0.945389
CCNG2	-1.19502	0.414266	-0.679626	1.39052	0.0698662
CLU	-1.70011	0.214482	0.213648	0.959276	0.3127
KDM5C	-0.544653	1.72303	0.030468	-0.566152	-0.642695
ENSMMUG00000051566	-1.54553	0.873934	0.254029	-0.381079	0.798644
ESD	-1.52787	0.719307	1.01909	-0.31444	0.103905
CHRDL1	-1.24583	-0.756928	0.712772	1.16215	0.127837
NR2F2	1.52235	0.468796	-0.922294	-0.391563	-0.677292
ENSMMUG00000053045	-0.924913	0.95811	-0.758543	-0.470426	1.19577
SRSF5	-0.531686	1.7047	-0.186584	-0.112428	-0.873997
CLIP3	-1.17855	-0.363626	1.39371	0.586756	-0.438292
MYT1	-1.01008	0.190494	1.55791	-0.0199983	-0.718325
RSRP1	1.74654	-0.191943	-0.73807	-0.276617	-0.539908
PALM	0.0114493	-1.44899	1.11527	0.71093	-0.388654
CNDP1	-1.23562	1.34014	-0.607867	0.552579	-0.049229
SMIM14	-1.54157	-0.145692	-0.0723877	0.723466	1.03619
RBL2	1.21315	-0.272585	-0.603666	-1.17662	0.839721
CLK2	1.33872	-0.0173714	-0.0280224	0.181096	-1.47443
ELAVL2	0.0547465	0.7365	1.17499	-0.717653	-1.24858
EFS	0.639517	-0.261908	1.2552	-0.2624	-1.37041
RHOB	-0.886614	-0.288983	0.612357	-0.857855	1.42109
TFDP2	1.6176	0.309619	-0.556296	-0.547046	-0.823879
CDC42BPB	1.23032	-0.435285	-0.715532	-0.983599	0.904099
TOMM20	-1.38844	0.415886	1.33383	-0.346363	-0.014914
SLC1A3	-1.34435	-0.621078	0.742145	0.107665	1.11562
TM9SF3	1.54481	0.361955	-0.234109	-0.716203	-0.956451
CHORDC1	1.16529	-0.0393077	0.744627	-1.34549	-0.525122
ENSMMUG00000047378	-1.29754	1.36886	-0.170867	0.501684	-0.402138
IGSF9	-0.437697	0.431399	1.48095	-0.323925	-1.15073
TMOD3	1.62642	-0.932555	-0.61195	-0.272526	0.190608
WDR34	0.401154	-1.50065	0.613288	0.982291	-0.496078
PTPN13	1.65848	-0.00861713	-1.00605	-0.444355	-0.199464
AP2S1	0.102596	-1.52674	-0.0405014	0.191811	1.27283
SREBF2	1.38418	-0.226886	0.641068	-0.946807	-0.851557
ENSMMUG00000063198	-0.439844	0.727096	0.0975273	1.0714	-1.45618
C6orf62	-1.14552	0.202352	-0.911017	0.705885	1.1483
SPARC	1.63241	0.223877	-0.855416	-0.338392	-0.662478
DDR1	1.65772	-0.222938	-0.264107	-1.05824	-0.112433
PCGF2	-0.326113	0.985224	1.14008	-0.947851	-0.85134
ATP1B1	-0.914498	-0.577755	-0.561559	0.576645	1.47717
TERF2IP	-1.20886	1.23684	0.278141	-0.818145	0.512028
TWF1	-1.55204	0.284251	0.886851	-0.380197	0.761133
RNF145	1.31493	-0.196196	0.706062	-0.726666	-1.09813
SERPINH1	0.997076	-0.57612	0.66272	0.365783	-1.44946
DST	1.50405	0.398269	-0.688353	-1.03625	-0.177715
PAK1	1.6876	0.0483029	-0.306671	-0.845532	-0.583698
MZT1	-1.4833	1.1044	0.329327	0.509786	-0.460208
ST13	1.5633	-0.306378	-0.311725	-1.15023	0.205034
TUBA1C	-0.781624	0.129416	-1.01035	0.135053	1.5275
IQGAP1	-1.65386	0.0646747	0.0842967	0.998517	0.506374
SINHCAF	1.35187	0.544232	0.0311465	-0.868316	-1.05893
FZD3	1.63105	-0.0243167	-1.09872	-0.291889	-0.216129
OLFM2	-1.22145	-0.716475	0.208536	0.387292	1.3421
OSTC	-1.03191	0.78014	-0.71237	-0.340816	1.30496
ENSMMUG00000058818	1.68528	0.101672	-0.511171	-0.830724	-0.445061
ZFP36L1	1.05032	-0.0472982	-1.30572	-0.604909	0.907611
SIPA1L2	1.65608	-0.281215	0.133828	-0.648728	-0.859969
CHD9	-0.392337	1.51651	-0.682635	-0.921766	0.480223
IL6ST	-1.19022	-0.290908	-0.365712	0.349132	1.4977
DMTF1	1.66626	-0.0456732	-0.250917	-1.01692	-0.35275
HYPK	-1.75923	0.150341	0.642261	0.4456	0.521023
DDX11	1.43402	-0.510781	0.361433	-0.0394749	-1.24519
TADA1	-1.21023	1.30314	-0.131341	-0.620779	0.659209
CHP1	-1.26282	1.14283	0.795494	0.007403	-0.682909
AKAP13	1.61498	0.157524	-0.176642	-0.974612	-0.62125
MTURN	-1.32409	-0.530557	-0.0358832	0.647822	1.24271
NT5DC2	0.0310507	-1.22839	1.53961	0.00366677	-0.34594
DNER	1.46954	-0.226858	-1.33225	0.115828	-0.0262545
SLC39A10	1.66403	-0.0140449	-0.826418	-0.0887565	-0.734814
CHD1	1.48546	0.323256	-0.0266355	-0.667087	-1.11499
CTNNAL1	1.55705	0.284411	-0.417584	-1.10348	-0.320402
FAM172A	1.57986	0.334397	-0.333152	-0.665448	-0.915653
CNTLN	-1.17464	-0.252641	-0.0535611	-0.113128	1.59397
CHD4	0.657973	-0.60366	1.42906	-0.568135	-0.915241
SDC2	1.03941	-0.782489	-1.21991	0.903093	0.0598929
MYO6	-0.499031	-1.27335	0.0382169	1.42584	0.308326
CCDC88A	-0.208196	0.463344	-1.54674	0.138113	1.15347
TTYH3	-0.569378	0.857194	1.15609	-0.191839	-1.25207
ECT2	-0.419787	1.45139	0.0266977	0.231287	-1.28959
CENPW	-1.57469	-0.393184	0.442729	0.820509	0.704635
SERINC1	-1.58193	-0.034367	0.326545	1.17307	0.116682
ENSMMUG00000006803	1.65893	0.173312	-0.564115	-0.852707	-0.415421
ECI2	-1.47366	-0.112593	-0.178356	1.21914	0.545469
ZFAND3	1.54119	-1.26059	-0.158913	-0.022222	-0.0994703
PTBP2	1.38461	0.703784	-0.413386	-0.920671	-0.754337
LYRM2	-0.532784	0.920782	-0.220881	1.10083	-1.26795
PLXNA1	1.68966	-0.18941	-0.0452058	-0.57169	-0.883352
C3orf14	-0.671622	0.19439	1.61614	-0.923482	-0.215425
VPS13C	1.5937	0.373395	-0.745747	-0.707415	-0.513931
ENO1	-0.0160406	-1.34093	0.109107	-0.216058	1.46392
CETN2	-1.25306	0.894488	-0.309795	1.14363	-0.475257
SLC39A7	1.59916	-0.245807	-1.01327	0.215778	-0.555868
GALNT2	1.54955	-0.193045	0.29877	-0.601394	-1.05389
ZHX1	1.499	-0.319064	-0.100799	-1.26716	0.188019
PGD	1.23956	-0.631644	0.0818934	0.609013	-1.29882
DONSON	-1.25807	-0.499038	1.20252	-0.255794	0.810381
RNF182	-1.03262	-0.0390048	1.2793	0.694287	-0.901966
FABP5	-1.14033	-0.666736	-0.276479	1.10531	0.978242
THOC7	-0.707677	0.986053	-0.628088	1.19251	-0.8428
BCL2L1	1.76052	-0.563756	-0.649721	-0.347671	-0.19937
DNAJC10	1.64118	0.225641	-0.463481	-0.534152	-0.869186
UBE2T	-1.02425	0.352262	1.25312	0.446879	-1.02801
PCBD1	-1.10779	1.02253	0.139712	0.896412	-0.950872
BCAS2	-0.165862	1.38062	0.618601	-0.877165	-0.956191
SLC36A4	1.60158	-0.8479	0.254732	-0.771305	-0.237103
SACS	1.22011	0.186911	-0.36541	-1.46959	0.427987
ENSMMUG00000059641	-0.0797826	-0.926591	1.55301	0.262313	-0.808953
PRDM2	1.61296	0.279225	-0.40443	-0.902181	-0.585575
ZC2HC1A	-1.47024	-0.597956	0.54254	0.656352	0.869305
PPP4C	0.93466	-1.24251	-0.171922	1.08781	-0.608038
GOT2	1.62681	-0.115605	0.117337	-0.802594	-0.82595
MED13	1.2794	-0.147454	-0.285356	-1.39839	0.551798
ENSMMUG00000038390	-0.280741	1.19333	0.768529	-0.34386	-1.33726
SOD1	-1.16096	-0.244919	-0.65614	1.16459	0.897433
GRIA3	-1.36653	-0.551742	1.21668	0.125262	0.576331
CDC37	0.396656	-1.28386	-0.735119	1.22226	0.400066
ORC6	-0.763467	0.70369	-1.21315	0.0707607	1.20216
AIF1L	1.45712	0.614015	-0.482079	-0.843712	-0.745344
LMAN1	1.09265	-0.615202	-1.01106	-0.527878	1.06149
NELFB	-0.497218	-1.46304	0.569376	0.294918	1.09596
RSRC1	1.506	-1.23559	-0.396782	-0.0780225	0.204394
MANEA	-0.701456	1.72029	-0.298614	-0.676362	-0.0438592
CDCA7	-1.07482	-0.0392739	-0.859224	1.2677	0.705617
PHIP	-0.563215	1.44781	-0.0205776	0.346756	-1.21077
DDX39A	-0.265124	-1.56752	1.06442	0.234895	0.533324
CDKN2D	-0.822195	0.995091	0.32241	0.778792	-1.2741
KNSTRN	-0.958473	0.367109	1.5457	-0.251344	-0.702993
EPRS1	1.18856	-1.11025	-0.905206	0.724401	0.102498
BRI3	-0.621362	0.993427	1.12561	-0.403526	-1.09415
LCOR	1.49987	0.540593	-0.471925	-0.835703	-0.732833
EIF4G3	1.52728	0.183882	-0.389657	-1.21237	-0.109138
ENSMMUG00000010611	1.63542	-0.192441	-0.320443	-0.0341736	-1.08836
TP53BP2	1.42357	0.321609	0.170159	-1.01596	-0.899382
IKBIP	-1.70918	-0.0629107	0.623333	0.689221	0.459538
ROCK1	-0.974107	0.135169	-0.0928459	-0.672114	1.6039
ERCC3	0.819552	-0.875522	1.24701	-0.209851	-0.981187
ENSMMUG00000003130	1.16616	0.011358	-0.720982	-1.23224	0.775701
PLIN3	-1.3653	-0.638901	1.15082	0.566756	0.286622
ENSMMUG00000064531	-1.14875	0.291508	-0.420994	1.53389	-0.255652
PTPN12	1.25975	-0.219674	0.800629	-1.04214	-0.79857
LUC7L	1.19255	-0.0412046	0.807041	-1.03911	-0.91927
EML1	0.396493	-0.747048	1.36727	0.16188	-1.17859
GMCL1	-1.1085	0.71816	-0.901947	1.19703	0.0952544
ENSMMUG00000063699	1.6245	0.0795946	-0.377126	-0.256049	-1.07092
DNMT1	1.52443	0.193528	-0.185945	-1.22999	-0.302027
PRKDC	1.52764	0.244917	-0.318377	-1.2002	-0.25398
KIF17	0.893404	-1.37002	0.929169	0.197471	-0.650028
GSE1	-1.62829	0.665687	-0.294707	0.509793	0.747519
MACO1	-0.667091	1.36909	0.237652	0.299146	-1.2388
SRPRA	1.37059	-0.823357	-0.0220691	-1.07041	0.545249
TRIM52	1.67194	-0.0350178	-0.967855	-0.480829	-0.188243
NIPSNAP2	-0.828895	0.260026	-0.807984	-0.218387	1.59524
PSME1	-1.37183	-0.0465604	0.267101	-0.255577	1.40686
SERAC1	1.72339	-0.610745	-0.660661	0.0172252	-0.469208
RDH5	-1.62358	-0.145881	0.966341	0.193705	0.609411
SELENOK	-1.12934	-0.234832	-0.713427	1.00519	1.07241
SCRN1	-1.35357	-0.759878	0.615289	0.960774	0.537381
SMARCB1	1.43689	-0.2734	0.563904	-0.70452	-1.02287
CELF2	-1.60118	0.125712	0.965056	-0.168367	0.678778
CHL1	-1.68306	0.366545	0.0679345	0.977032	0.271551
PCDH18	1.578	0.378397	-0.58999	-0.476921	-0.889487
ELAVL4	-0.797424	0.857234	1.21835	-0.23409	-1.04407
RBM33	1.59663	0.0652224	-0.0394459	-0.557366	-1.06504
SCARA3	-1.46336	-0.497656	0.759926	0.20551	0.995582
TFG	1.71316	-0.235868	-0.103479	-0.521001	-0.852814
IPO5	1.57039	0.203377	-0.627935	-1.0429	-0.102931
ARHGAP19-SLIT1	-0.115632	1.48925	-1.32335	0.0649421	-0.115213
EPHA3	0.139826	0.806409	0.904645	-0.293422	-1.55746
LMO1	1.4019	0.717355	-0.767856	-0.582553	-0.768843
ZNF451	-0.00485752	1.71744	-0.564042	-0.76485	-0.383695
PDHB	1.42544	-0.628464	-1.17422	-0.0595618	0.436809
RTN1	-1.58572	-0.0127308	0.725715	0.973878	-0.101142
ATIC	0.0236338	1.72093	-0.675878	-0.46368	-0.605006
OGA	-0.458684	1.56051	-1.11601	-0.226192	0.24037
RIMKLB	-0.931393	0.824019	1.31338	-0.628527	-0.57748
OLIG2	-0.239109	-0.46444	-0.903509	-0.0963257	1.70338
RND2	1.16528	-0.151045	0.887833	-1.05624	-0.845821
STMN2	-1.14296	-0.142366	-0.377462	1.58918	0.0736124
LRRC4B	-0.319017	-1.45051	1.28776	0.34056	0.141211
NSD1	1.51646	0.174535	0.102885	-0.738355	-1.05552
ENSMMUG00000052013	1.10839	0.381152	-1.5362	-0.340807	0.387466
UCHL5	-0.403554	1.70697	-0.909616	-0.292953	-0.100848
SHTN1	-0.904317	0.418813	-0.860654	1.4977	-0.151546
NAA16	1.16553	0.0360738	0.794245	-1.09206	-0.903781
XPC	1.42579	-0.858404	0.656723	-0.769766	-0.454346
BRD7	1.52364	0.385213	-1.0463	-0.25324	-0.609308
SMC6	1.28971	-0.106835	-1.29572	-0.509255	0.622096
SOX9	-0.236273	0.318588	-1.02873	-0.607661	1.55407
NET1	1.45558	0.591506	-0.654643	-0.437971	-0.954475
STUB1	1.15608	-1.55793	0.0937101	-0.146002	0.454139
CAMK2N1	0.0495753	-0.750004	-0.911336	1.61385	-0.00208055
CHD2	1.58359	0.385011	-0.710432	-0.474472	-0.783695
PTPRZ1	-0.446225	-0.685407	-0.389917	-0.244589	1.76614
RND3	-0.793462	1.64248	-0.818258	-0.0518302	0.0210704
AKAP12	-1.1431	0.189936	1.49312	0.10556	-0.64552
PHTF1	1.56008	0.193369	-0.404274	-0.197534	-1.15165
ZNF354A	1.60827	-0.198294	0.0744749	-0.376987	-1.10746
PRKACA	1.19242	-0.755301	0.573578	0.258815	-1.26952
IRS2	1.45255	0.390378	-1.22075	-0.475284	-0.146891
PLS3	-0.330309	1.10949	-1.47527	0.000756245	0.695338
CEP350	1.58989	0.302264	-0.405655	-0.979342	-0.50716
NEUROD1	0.569915	-1.07103e-05	1.30851	-0.623952	-1.25446
CDK6	0.0283578	1.21654	-1.4915	-0.240178	0.486783
AFDN	1.41889	0.69902	-0.717709	-0.662974	-0.737222
ID4	0.25099	1.48084	-0.461759	-1.23685	-0.0332121
SP9	-0.147854	0.722234	-1.6825	0.477434	0.630686
PPP1R17	-0.819581	-0.584363	1.66449	0.171681	-0.432223
DCN	-0.807582	-0.763146	1.32825	0.818294	-0.575816
THBS1	-0.598799	-0.59552	1.69074	0.142277	-0.638702
SMOC1	-1.13087	-0.955597	1.05528	0.800794	0.230394
HSPA8	-0.538588	-0.785751	1.65649	-0.549081	0.216926
RPL19	-0.584319	-0.922106	1.66451	0.0332124	-0.191298
HES6	-0.598916	-0.828382	1.16164	1.01894	-0.753282
SLA	-0.660805	-0.243831	1.75784	-0.268662	-0.584545
SMARCD3	-0.361113	-0.498534	1.74814	-0.15238	-0.73611
RAC3	-0.392037	-1.38089	1.3616	0.227155	0.184172
ENSMMUG00000018240	-0.423933	-0.658751	1.76392	-0.194203	-0.487033
RPS26	-0.253563	-0.574095	1.62607	0.167925	-0.966339
EOMES	-1.10102	-0.369204	1.52031	0.38657	-0.436655
ENSMMUG00000031435	-0.496427	-0.838181	1.72395	-0.234752	-0.15459
ENSMMUG00000060590	0.349971	-0.0875737	-1.20281	-0.525014	1.46542
LMO2	-0.980053	-0.759926	1.50334	0.41327	-0.176627
GNPTAB	-1.02428	-0.941877	0.789013	1.20027	-0.0231269
UBALD2	-0.063547	-0.775726	1.73098	-0.45884	-0.432869
POU3F2	-0.631467	-1.2214	1.03242	1.00478	-0.184329
EMP3	-0.788396	-0.935711	1.54012	0.330736	-0.146745
TTYH2	-0.439726	-0.441871	1.78877	-0.443098	-0.464074
C1QL1	-1.11802	-1.04622	0.639111	0.557651	0.967479
DDAH2	-0.481757	-0.72026	1.67826	0.161365	-0.637606
RPL26	-0.421175	-0.456072	1.77198	-0.254458	-0.640273
NFIC	-1.21078	-0.856714	0.350696	1.17728	0.539518
ENSMMUG00000052424	0.880012	1.21048	-0.893146	-0.248123	-0.949227
LPCAT1	-0.785788	-1.08019	1.2102	0.845636	-0.189856
MDFI	-0.957486	-0.922607	1.46331	0.252524	0.164264
MLLT3	-0.686294	-0.613483	1.71134	0.0581111	-0.46967
HTRA1	-1.11027	-0.965669	0.27256	1.16093	0.642442
NEFM	-0.698545	-0.860122	0.625879	1.45266	-0.519875
MFAP2	-0.899802	-0.750982	1.24508	0.907779	-0.50208
SEL1L3	-1.21043	-0.905644	0.516051	1.09012	0.5099
CNR1	-0.863205	-0.53838	1.70672	-0.0997997	-0.205337
AZU1	0.102369	-0.734973	1.65328	-0.197989	-0.822684
ENSMMUG00000019174	1.28357	0.830932	-0.9901	-0.404781	-0.719621
MARCKS	0.185579	-1.30481	1.10959	-0.713438	0.723076
ENSMMUG00000020930	-0.374251	-0.385899	1.78325	-0.573441	-0.449661
TMEM108	-1.13155	-0.875289	0.115552	0.670304	1.22098
SLITRK2	-0.866318	-0.839532	1.57911	-0.083335	0.210071
TMEM132A	0.338292	-0.880355	1.54794	-0.180061	-0.825821
FXYD6	-1.17959	-0.949568	0.72858	0.387836	1.01274
MRPL28	-0.254291	-1.25331	1.53738	0.00198332	-0.0317642
LHX2	-0.437411	-0.543986	1.69254	0.0889466	-0.80009
ENSMMUG00000047370	-0.313014	-0.835761	1.69961	0.0102082	-0.561038
LRP8	-0.964076	-0.688689	1.43539	0.614796	-0.397422
RPL35	-0.927808	-1.2059	0.835746	0.917462	0.380497
IL33	-1.10643	-0.946844	0.148823	1.1	0.804454
NRG1	-0.976682	-1.13063	1.05537	0.750312	0.301635
ANP32E	0.496497	1.41534	-1.13586	-0.105972	-0.669999
SLC25A1	-0.174999	-1.43002	1.37716	0.144691	0.0831654
COBL	-0.821588	-1.13576	1.29976	0.583216	0.0743651
MXD3	0.19323	-1.58373	0.895201	-0.26734	0.762636
NKAIN3	-0.70721	-1.01897	0.988815	1.14713	-0.409765
ENSMMUG00000058315	-1.11709	-0.774064	1.22531	0.796545	-0.130699
CTXN1	-0.823715	-1.02516	1.43633	0.453662	-0.041118
LINGO1	-0.253102	-1.04443	1.62789	0.0998547	-0.430214
PRDX1	-0.326149	-0.226237	1.69312	-0.167152	-0.97358
KCNQ2	0.198181	-0.621418	1.66407	-0.753807	-0.48703
PALMD	-0.868078	-0.0445194	1.57898	0.181227	-0.847608
SLC44A2	-0.72595	-1.07055	0.434024	1.45918	-0.0967018
NEUROD2	-0.678708	-0.0321268	1.7341	-0.449616	-0.573648
CCN3	-0.688681	-0.642254	1.10819	1.07582	-0.853079
TUBB4A	-0.773985	-1.11454	0.9625	1.09688	-0.17086
PPP1CA	-0.405826	-1.13988	1.49599	0.410049	-0.360339
FAM53B	-0.329079	-0.803831	1.0397	1.0859	-0.992684
NRN1	-0.905644	-0.299089	1.62299	0.220289	-0.638544
CLMP	-0.479686	-0.236347	1.76841	-0.397716	-0.654662
UBA52	-0.556684	-0.303697	1.76055	-0.234221	-0.665945
MDK	-0.556212	-0.561738	1.77638	-0.291919	-0.366513
TECR	-0.28905	-1.02749	1.66001	-0.0198994	-0.323569
PPIA	-1.1199	-0.903633	1.27759	0.46999	0.275956
CPEB4	-1.11288	-0.72523	1.39926	-0.0816602	0.520509
KIF20B	0.42273	0.638628	-1.77218	0.254915	0.455907
GPX1	-0.738567	-1.18991	-0.0861198	1.03835	0.976249
EEF1A2	-0.74073	-1.00308	1.43074	0.574343	-0.261275
GADD45G	-0.903896	-0.884795	0.957161	1.17016	-0.338633
ISLR2	-0.0201063	-0.521868	1.73118	-0.486988	-0.702218
KCTD17	0.0404069	-1.2953	0.820117	1.09871	-0.66393
KIF1A	-0.365668	-0.788316	1.45249	0.589183	-0.887687
SRM	-0.41202	-0.612145	1.6335	0.243774	-0.853103
ENSMMUG00000056736	-1.05282	-0.799875	-0.0281208	1.43144	0.449378
MARCKSL1	0.0644185	-0.3805	1.49979	0.079387	-1.26309
C12orf57	-1.03012	-1.09456	0.947325	0.862802	0.314552
SLC1A2	-0.804831	-1.02832	0.321429	0.0316976	1.48003
ATP5F1D	-0.260815	-1.32953	1.45744	0.191687	-0.0587734
ENSMMUG00000004545	-0.530467	-0.726897	1.35722	0.769581	-0.869438
UBE2S	-0.98941	-0.643483	1.61238	-0.0489193	0.0694283
SMARCA5	1.21704	0.955434	-0.767633	-0.824682	-0.580162
SAC3D1	-0.719075	-0.530224	1.63828	0.275702	-0.664687
CENPF	0.846689	0.935316	-1.51252	0.0705323	-0.340018
ROBO2	-0.479286	-0.0657397	1.74477	-0.631906	-0.567838
GCA	-1.11195	-0.830983	1.37255	0.400219	0.170171
NCL	1.17076	0.912489	-1.15406	-0.335858	-0.593328
SOX11	-0.151769	-0.443176	1.76068	-0.60617	-0.559567
PROKR2	-0.760722	-0.139133	1.68387	-0.0320003	-0.75201
SHF	-0.207548	-0.885433	1.71804	-0.426374	-0.198685
AUTS2	0.0652901	-0.0677429	1.63167	-0.786304	-0.842918
MOXD1	-1.06069	-0.836766	0.594448	1.34881	-0.0457963
TMEM145	0.580308	-1.10243	1.34193	-0.804289	-0.0155211
TSPAN5	-1.08108	-0.746691	0.79223	1.26272	-0.227181
VAT1L	-0.926526	-1.0835	0.878187	1.0931	0.0387363
NT5C	-0.152023	-0.986228	0.517071	-0.817228	1.43841
ANXA6	-1.15936	-0.971521	0.912115	0.347282	0.871481
SYT5	-0.485768	-0.847125	1.30977	0.827232	-0.804111
MMP14	-0.758506	-1.17509	0.516461	1.33025	0.0868809
RRP1	-0.417241	-0.836069	1.73473	-0.211262	-0.270157
MAP2K2	-0.555021	-1.47549	0.950917	0.421754	0.657843
SSX2IP	-0.874978	-0.344796	1.72173	-0.138781	-0.363179
ATP13A1	0.170197	-1.04758	1.33172	0.478842	-0.933178
NSMF	-0.581248	-1.16931	0.52761	-0.184986	1.40793
ST3GAL3	-0.727176	-0.913163	1.54047	0.410023	-0.31015
RPL24	-0.652117	-0.283831	1.76932	-0.326079	-0.507296
RPL4	-0.70313	-0.274493	1.75348	-0.222681	-0.553172
FBL	-0.390153	-1.01062	1.47549	0.53122	-0.605934
PPP1R9B	0.0280367	-1.1025	1.48483	0.292199	-0.702572
FTH1	-1.06936	-1.02949	0.376518	1.15411	0.568221
PPP2R2B	-1.26951	-0.514037	1.14142	0.875637	-0.233508
ENSMMUG00000010266	-0.958973	-1.17383	1.06164	0.506199	0.564956
PRDM8	-0.493623	-0.014159	1.72871	-0.50475	-0.716181
KCTD15	-0.853623	-0.896633	0.942701	1.19517	-0.38762
ARHGEF25	-0.190236	-0.69554	1.75824	-0.372789	-0.499671
HOPX	-1.33893	-0.705333	1.11739	0.589263	0.337608
PMPCA	-0.173286	-0.972434	1.65111	-0.544647	0.0392579
NRXN1	-0.990692	-0.82792	0.106951	0.201329	1.51033
CD81	-0.52442	-1.32807	1.33288	0.417362	0.102245
APC2	-0.433709	-0.637677	1.23103	0.888957	-1.04861
PRDX2	-0.115672	-0.524457	1.6425	0.00446429	-1.00684
ERH	0.279471	1.02556	-1.65634	0.355833	-0.00452189
CDC42EP3	-0.581746	-0.0773845	1.69882	-0.181381	-0.858309
HNRNPA0	0.0233138	-0.699218	1.61091	0.0215882	-0.95659
HNRNPD	0.553281	1.47564	-0.36829	-0.860897	-0.799736
CBX5	1.26101	0.882228	-0.702263	-0.94425	-0.496728
DLGAP5	0.446148	1.50083	-0.897141	-0.214664	-0.835174
HNRNPU	0.666582	1.35224	-0.517322	-1.15832	-0.343178
SYT4	-0.490385	-0.0020513	1.6798	-0.25247	-0.934898
YIPF2	-0.542261	-1.35221	1.17411	0.70622	0.0141372
PKN1	0.0833007	-1.36147	1.40377	-0.346524	0.220923
ENSMMUG00000055376	-0.508262	-0.49197	1.78588	-0.364149	-0.421499
GSTP1	-0.467597	-1.4636	1.01763	0.762027	0.151545
OAZ1	-0.748543	-0.808571	1.3969	-0.560881	0.721094
MED25	-0.629955	-1.09326	1.3766	-0.302526	0.649145
BMP7	-1.08709	-1.01904	0.510427	0.447058	1.14865
TMEM59	-1.16978	-0.92475	1.15554	0.482572	0.456419
ENSMMUG00000055810	0.910687	1.22864	-0.698042	-0.460684	-0.980606
LMO7	-1.20522	-0.670166	1.03231	-0.160394	1.00347
TMTC4	-1.06791	-0.855871	0.949878	1.09954	-0.125633
LBR	0.895527	1.17324	-0.98416	-0.178436	-0.906167
TRAPPC5	-0.349478	-1.56057	0.903682	0.258782	0.747583
RPS5	-0.500449	-0.92829	1.36725	0.743688	-0.682197
UCHL1	-0.940211	-0.624697	1.53552	0.443345	-0.413962
FZR1	-0.158348	-1.39511	1.41744	-0.00343809	0.139449
RPSA	-0.702356	-1.1975	1.34546	0.510405	0.0439891
MKI67	0.770156	1.36939	-0.673735	-0.691705	-0.77411
RPL28	-0.893865	-0.983011	0.805258	1.24717	-0.175553
PCDH8	-0.699218	-0.828726	0.274516	1.61752	-0.364096
CDK2AP1	-1.10897	-1.04129	0.698904	0.457128	0.994223
CHST2	-0.235228	0.0441624	1.67808	-0.640663	-0.846353
JTB	-0.671645	-1.10482	1.51334	0.173032	0.0900911
CSRP2	0.201052	-0.132979	1.5189	-0.360132	-1.22684
VAT1	0.12487	-0.492625	1.66627	-0.402061	-0.896452
LRATD2	-0.906136	-1.12832	0.649197	1.20492	0.180333
SLC25A6	-0.450296	-1.25402	0.782719	1.2313	-0.3097
NDUFV1	-0.556611	-1.44898	0.277548	0.965377	0.762665
CHAC2	-0.808386	-0.59764	1.71372	-0.103085	-0.204612
CDC20	-0.109978	-0.586674	1.64825	0.0111343	-0.962735
FAM3C	-1.03521	-1.0641	1.05084	0.257673	0.790797
HGS	0.641445	-1.05994	1.1682	0.265202	-1.01491
RNF112	-1.27329	-0.787231	1.15105	0.353501	0.555974
RAP1GDS1	-0.759735	-1.32306	1.04085	0.369105	0.672833
FUZ	-0.973029	-1.0768	0.70975	0.174017	1.16606
HDAC5	0.381889	-1.18387	1.48165	-0.225096	-0.454572
ADGRG1	-0.663806	-0.608047	1.73726	-0.410537	-0.0548744
ENSMMUG00000023144	-0.361868	-0.548812	1.7766	-0.568349	-0.297566
RPL8	-0.422795	-1.03918	0.92953	1.19777	-0.665323
HRAS	-0.566809	-1.41439	1.14139	0.313077	0.526728
NFE2L2	-1.26231	-0.834488	0.518255	1.1021	0.476445
IGFBPL1	-0.15459	-0.216578	1.7233	-0.525548	-0.826583
HNRNPR	0.764827	1.19855	-1.33414	-0.332475	-0.29676
NUMBL	-0.327647	-0.684569	1.76532	-0.486278	-0.266824
CRIP2	-0.919994	-1.23971	0.517208	0.808017	0.834474
AIP	-0.499235	-0.881033	1.36576	0.751944	-0.737439
SETD7	-1.38131	-0.280153	1.40195	0.214535	0.044975
APP	-0.983685	-0.860418	0.367399	1.46867	0.0080308
NDUFS8	-0.699782	-1.17555	1.37258	0.00844061	0.494314
GRIA2	-0.899203	-1.08952	1.23362	0.0633221	0.691779
ADCYAP1R1	-0.570661	-0.893829	0.25891	-0.417424	1.623
SCARB2	-0.410379	-1.33576	1.28425	0.612632	-0.150744
ID2	-0.905602	-0.73688	-0.218957	0.276322	1.58512
BAX	-0.71254	-0.881947	1.47286	-0.457713	0.579337
ENSMMUG00000058820	-1.01571	-0.358503	1.2389	0.872567	-0.737257
PHLDA1	-1.03011	-0.469473	1.14225	-0.642889	1.00021
FDFT1	-0.0917477	0.11445	1.60995	-0.652335	-0.980313
CPE	-0.687079	-0.681034	0.986061	-0.813668	1.19572
MCM8	-1.00456	-0.683602	1.58518	-0.000585796	0.103568
GCN1	-0.492875	-0.582089	1.59189	0.354117	-0.871046
TAGLN3	-0.212029	-0.214128	1.67377	-0.217955	-1.02966
RNF126	1.08041	-1.58364	0.352248	-0.232177	0.383165
CLPTM1	-0.778269	-1.15117	0.438484	0.126867	1.36409
SMC4	0.143504	1.15505	-1.54085	0.468765	-0.226468
TSC2	-1.13943	-0.927671	0.382738	0.470634	1.21373
HEBP2	-0.357496	-0.404208	1.69807	-0.0282945	-0.908067
EEF1A1	-0.632318	-1.41367	0.90622	0.825749	0.314021
NAP1L1	1.069	0.957118	-0.293736	-0.445279	-1.2871
GPSM1	-0.157382	-1.57365	0.757926	0.961387	0.0117199
FADS2	-0.507242	-0.806598	1.70932	0.0169082	-0.412384
MZT2A	-0.713485	-1.32846	0.229911	0.780447	1.03159
LDHA	-0.71415	-0.68104	1.3369	-0.757356	0.815642
MEF2C	-1.37433	-0.42859	1.09345	0.844745	-0.135266
ENSMMUG00000013429	-0.973533	-0.614292	1.58285	0.293564	-0.288589
RTN2	-0.710247	-0.397	1.43001	0.626315	-0.949077
STXBP1	-0.313006	0.0300955	1.69422	-0.573667	-0.837643
LSM7	-0.802984	-1.19788	0.31742	0.393079	1.29036
SLC22A17	-0.790025	-1.21956	0.149725	0.668613	1.19125
LTBP4	0.111959	-0.536573	1.62825	-0.199322	-1.00431
SRSF7	-0.963799	-0.484734	1.67162	-0.203525	-0.0195641
FAM171B	-0.989077	-0.878183	0.615266	1.36364	-0.111642
RPL10	-0.971256	-1.17022	0.907355	0.843377	0.390741
THAP4	-0.408363	-1.44783	0.928964	-0.0076444	0.934875
DGUOK	0.324222	-0.689034	1.54614	-0.183363	-0.997966
STK17A	-1.17336	-0.348045	1.58111	-0.0160002	-0.0437015
ENSMMUG00000008383	-0.533324	-1.33142	1.31993	0.434067	0.110751
GPS1	-0.610981	-1.12024	1.38011	-0.274679	0.625794
ARHGAP21	-0.0369336	-0.228997	1.64701	-1.06461	-0.316477
ALYREF	-0.656695	-1.13515	1.49495	0.173491	0.123403
LSM4	-0.261899	-1.00262	1.55064	-0.633341	0.347215
ENSMMUG00000021023	0.217831	-0.396685	1.632	-0.53173	-0.921421
ATP13A2	-0.368921	-0.431773	1.28285	0.737574	-1.21973
CLIP2	-0.801541	-1.12971	1.36003	0.100605	0.470621
CHN1	0.0659346	-0.956483	1.66526	-0.325705	-0.449009
SPRY2	-0.857151	-0.827493	0.0243484	0.0550135	1.60528
SFPQ	0.575734	1.49223	-0.586297	-0.754031	-0.72764
PSMB3	-0.883754	-0.533446	1.63729	0.228671	-0.448766
ACAP3	-0.356061	-0.813572	0.24261	-0.703273	1.6303
SMPDL3A	-0.900631	-0.799838	0.354277	1.54416	-0.197965
DCLK2	-0.096127	0.443956	-1.65026	0.31793	0.984498
ENSMMUG00000011291	-0.342641	-0.612229	1.69271	0.0613585	-0.799203
ITM2B	-1.11103	-0.848883	0.200555	0.401604	1.35776
ENSMMUG00000001210	-0.220051	0.122073	1.25095	0.3474	-1.50037
ENSMMUG00000055721	-0.335291	-0.739411	1.66746	-0.734977	0.142215
NLGN1	-0.498748	-0.294127	1.59521	0.23057	-1.0329
SV2A	-0.680904	-0.913861	1.5002	0.519592	-0.425028
SNX7	-0.727938	-0.878193	0.265488	1.6003	-0.259661
GOLIM4	-1.15399	-0.940997	0.383658	1.14833	0.563002
SEPTIN3	-1.03089	-0.383421	1.64453	-0.287262	0.0570508
DOK6	-0.993941	-0.349633	1.25796	0.850185	-0.76457
IGF2BP1	1.34572	0.785703	-0.541652	-0.709336	-0.880435
NXPH4	-0.612452	0.0718725	1.57927	0.0220528	-1.06074
ZNF536	0.904612	1.26662	-0.733473	-0.77271	-0.665048
RPS3A	-1.10426	-0.627679	1.42008	-0.244915	0.556776
MYO1B	0.924976	1.23897	-0.879564	-0.568236	-0.716141
THSD7A	-0.13855	-0.489977	1.70016	-0.907292	-0.16434
NUCKS1	0.155217	1.19734	-1.46667	0.495593	-0.38148
ZEB2	0.343176	0.968063	-1.68959	0.0922034	0.286145
RNF215	-0.932677	-0.94705	1.20608	0.862026	-0.18838
TMEM237	-0.00763696	-0.467212	1.70263	-0.359934	-0.867846
SSTR2	-0.619059	0.244108	1.63732	-0.431692	-0.830673
C17orf58	-1.15748	-0.905929	1.04049	0.169605	0.853319
CCNB2	-0.052375	-0.810386	1.19429	0.7984	-1.12993
PHGDH	-0.97155	-1.12047	1.06152	0.247997	0.782506
ENSMMUG00000041688	-1.10972	-1.00638	0.921591	0.907881	0.286624
SDCCAG8	-0.890815	-0.680722	1.34703	0.78433	-0.559824
INSIG2	-0.356663	-0.986668	1.41101	0.639228	-0.706906
ENSMMUG00000022769	0.0394649	-0.973284	1.63608	-0.603922	-0.0983425
H2AZ1	-0.847217	-0.974197	0.467852	1.4508	-0.0972396
PAFAH1B3	0.121748	-0.914635	1.38507	0.430155	-1.02234
ENSMMUG00000015563	-1.01491	-0.508221	1.35571	0.739338	-0.571916
MPDU1	-0.805506	-1.01799	1.50104	0.0913921	0.231058
GNAI1	-0.652169	-0.0478471	1.734	-0.392395	-0.641593
PCSK1N	-0.00512804	-1.5756	0.669611	-0.116292	1.02741
PTP4A2	-0.110706	1.45811	-1.32313	-0.247372	0.223098
PNP	-0.620395	-0.52259	1.76835	-0.214169	-0.411196
RPS15	-0.90329	-1.23855	0.982304	0.499558	0.659981
NUDC	-0.430668	-1.54971	0.79594	0.394804	0.789636
PAG1	-0.897159	-1.03282	1.34924	0.554293	0.0264532
EIF4A1	0.0900314	-0.00790017	1.49131	-0.271957	-1.30149
RPL7A	-0.742256	-0.239019	1.75507	-0.308527	-0.465265
BRD9	-0.157029	-1.51274	0.983785	0.834846	-0.148861
ENSMMUG00000019238	0.937517	-0.0428862	-1.67577	0.445009	0.336131
KIF3C	-0.773615	-0.466612	1.6701	0.173769	-0.603637
GPM6A	-0.949543	-0.280523	1.67091	-0.475924	0.0350814
MACROH2A2	0.995776	1.07104	-0.156778	-0.875658	-1.03438
RPS28	-1.04682	-0.756845	1.05336	1.06083	-0.310525
ENSMMUG00000040370	0.299231	1.54441	-0.625788	-1.05169	-0.166161
JPT1	-0.775122	-0.576247	1.50908	0.544593	-0.702302
EHD1	-0.134801	-0.919916	1.10502	0.952921	-1.00322
EID1	0.00620891	0.273717	-1.69265	0.530193	0.882533
YJEFN3	-0.893848	-0.490659	1.69304	-0.00207878	-0.306451
NMT2	-0.89293	-0.845064	1.36445	0.71452	-0.340981
STK39	1.16857	0.9681	-0.969191	-0.388319	-0.779163
AHDC1	-0.661688	-1.03152	0.677046	1.38085	-0.364685
RNF208	-1.03896	-1.05515	1.10879	0.707577	0.277743
TAF10	0.161865	-0.823822	1.08547	0.795017	-1.21853
NDUFB11	-0.664257	-0.724348	1.70987	0.0108524	-0.332119
SLC25A28	-0.931769	-0.85089	1.53277	0.241514	0.00837121
MAF1	-0.562231	-0.919652	1.3625	0.75776	-0.638379
RPS21	0.38038	-1.22567	1.46914	-0.317692	-0.306162
RPS17	-0.475795	-0.536307	1.17741	0.938627	-1.10394
B2M	-1.1314	-0.89388	0.158086	1.20993	0.657266
SNF8	-0.706719	-1.41446	0.711747	0.701449	0.707982
TRIM27	-0.017903	-1.17111	1.36405	0.525769	-0.700798
SMTN	-1.04626	-1.05156	0.624873	0.333797	1.13915
SLC2A11	0.101552	-1.0641	1.43895	-0.81843	0.342032
PLD3	-0.0471286	-0.532264	1.71151	-0.297403	-0.834717
PSMD8	-0.878888	-0.664896	1.63246	-0.285795	0.197115
PRAF2	-0.685016	-0.718163	1.68692	-0.39587	0.112126
CLDND1	-1.03288	-1.13819	0.894752	0.744427	0.531897
MAP1B	0.993449	0.977093	-0.407137	-0.202707	-1.3607
ENSMMUG00000004539	0.122045	-1.15184	1.57635	-0.383089	-0.163468
TSC22D1	-0.567038	-0.0826198	1.53419	0.238442	-1.12297
ALDOC	-0.848995	-0.820299	0.890002	-0.479424	1.25872
HSPA5	0.00928418	0.50437	-1.41276	-0.370646	1.26975
SNRPC	-0.156014	-1.23672	1.55886	-0.048902	-0.117229
MYL12A	-0.762578	-0.63593	1.52716	0.515999	-0.644656
CKAP2L	0.0795318	1.42262	-1.33674	0.208218	-0.373631
ANKRD54	-0.450041	-0.651766	1.76316	-0.180249	-0.4811
ACADVL	-0.71725	-0.77894	0.684314	1.42597	-0.614098
PHB	-0.575764	-0.803591	1.24889	0.918023	-0.787557
RAB24	-0.48287	-1.00271	1.53004	-0.480166	0.435705
ENSMMUG00000014648	-1.05168	-0.497318	1.09762	-0.592847	1.04422
NRIP1	1.15451	0.957414	-1.11546	-0.428456	-0.568014
MFGE8	-0.916678	-0.917405	-0.270576	0.929734	1.17493
ENOX1	0.131859	0.919652	-1.61072	0.718963	-0.159753
ASPH	-0.90573	-0.790609	0.375644	1.53823	-0.217538
ENSMMUG00000062350	-0.47678	-0.446749	1.31953	0.738353	-1.13436
PLXNC1	-0.863758	-1.09366	0.158583	0.444008	1.35482
EMX1	-0.0909659	0.37129	1.50367	-0.864206	-0.919785
FKBP9	-0.56899	-0.242891	1.54905	0.319159	-1.05633
CFDP1	-0.0343762	1.34989	-1.46151	0.195315	-0.049318
VEPH1	-0.691871	-1.15356	-0.208856	0.891197	1.16309
METTL26	-0.198671	-1.50289	0.72388	-0.10274	1.08042
XRCC1	-0.404295	-1.07688	1.17799	-0.636842	0.940031
POLR2I	-0.670277	-0.718326	1.1273	1.06065	-0.799346
LAPTM4A	-1.09458	-1.03887	1.01415	0.375598	0.743692
CENPV	-0.782312	-0.188381	1.74449	-0.45722	-0.316573
ACTR1A	-0.534834	-0.759069	1.2034	0.963268	-0.872764
CCDC167	-0.748595	-0.746846	0.610991	1.47115	-0.586704
B4GALNT4	0.539982	-0.4483	1.36933	-0.198959	-1.26206
DDRGK1	0.158541	-0.290457	1.56231	-1.17707	-0.253326
RUVBL2	-0.476749	-1.17551	1.2803	0.770169	-0.398211
APBB1	-0.577137	-0.787713	0.735835	1.38855	-0.759536
HMMR	0.336782	1.52176	-1.14392	-0.416155	-0.29846
RPL39	-0.209289	-0.376732	1.54827	0.209591	-1.17184
SCAMP3	-0.369601	-0.911421	1.5019	0.503	-0.723877
HCFC1R1	-0.0206032	-0.326404	1.41226	0.283207	-1.34846
MGST1	-0.753674	-1.01172	0.209931	1.53753	0.0179247
TAX1BP1	0.750732	0.866602	-1.54985	-0.408629	0.341148
POLD2	-0.260395	-1.15029	1.071	1.00779	-0.668097
CXXC5	-0.798786	-1.07209	-0.0902882	1.35564	0.605515
CIPC	-0.243599	-0.634726	1.76744	-0.34794	-0.541175
HNRNPDL	0.636368	1.38632	-0.236295	-0.788936	-0.997452
MMADHC	-1.15128	-0.968028	0.429211	1.09509	0.595011
AKR7A2	0.133647	-0.45052	1.64855	-0.370239	-0.96144
ENSMMUG00000002324	-0.936998	-1.14721	0.206457	0.925908	0.951845
SNN	-0.797062	-1.07085	-0.00723342	0.458086	1.41706
SLC3A2	-0.923895	-1.19956	0.339138	0.875149	0.909165
NDUFB4	-0.951184	-0.432357	1.65103	-0.404516	0.137026
TRAPPC3	-0.408236	-0.462519	1.70925	-0.00312103	-0.835379
PRRC2A	-0.690935	-1.17762	0.951809	1.09464	-0.177892
RABAC1	-0.744459	-1.244	0.454827	0.25919	1.27444
JMJD6	-0.000394252	-0.739085	1.72229	-0.443836	-0.538971
IFT27	0.606357	-0.861172	0.751926	0.800673	-1.29778
NTRK2	1.20417	0.804931	-1.27655	-0.411952	-0.32059
FBLN1	-0.331106	0.0520452	1.41482	0.219829	-1.35559
GRAMD1A	-0.822078	-0.845846	0.730254	-0.435556	1.37323
ENSMMUG00000014862	-0.813964	-0.464834	0.785045	1.33848	-0.844728
ZFP37	-0.0562635	-0.879271	1.70621	-0.47365	-0.297024
NEIL2	-0.512117	-0.174596	1.75964	-0.403507	-0.669415
MPPED1	0.105542	0.0685969	1.48521	-0.381589	-1.27777
AURKAIP1	-0.711963	-1.13647	0.979623	1.09185	-0.223043
GSTT1	-0.845635	-0.751136	1.05143	1.12897	-0.583627
DERL1	-0.578338	-0.928098	1.03651	1.1348	-0.664868
TNK2	-0.622377	-1.1546	-0.026818	0.330936	1.47286
MAP6	-0.0576036	-0.515525	1.70426	-0.26006	-0.871075
ATP5MC3	0.894796	0.624986	-1.48315	0.533198	-0.569834
RBFOX2	0.354057	-0.215002	1.36898	-0.114799	-1.39324
APBA2	0.231977	-0.971113	1.27296	-1.05438	0.520562
MRPL24	-0.89184	-0.652504	1.46489	0.600894	-0.521435
GPAM	-0.93698	-0.944894	1.37027	-0.0764086	0.588007
PDIA6	0.574966	0.148609	-1.20235	-0.782149	1.26092
SYNGAP1	0.515823	-0.691943	1.51161	-0.469752	-0.86574
DVL3	-0.368627	-0.96539	1.69142	-0.118085	-0.239324
DYNLL1	-1.34885	-0.606463	1.22228	0.524872	0.208162
IVD	-1.12502	-0.908739	0.869333	0.0949483	1.06947
HSD17B10	-0.684645	-0.876894	1.49762	0.540586	-0.47667
CD59	-0.893065	-0.987863	-0.200126	1.14329	0.937761
TAGLN2	-1.01349	-0.818048	-0.160769	1.37901	0.613298
CYB5B	0.751895	1.30019	-0.572645	-0.338562	-1.14088
NEUROG2	0.490066	-0.167168	1.38913	-0.445722	-1.26631
PRKCSH	-0.299476	-1.17271	0.768162	-0.569173	1.2732
SCAND1	-0.234166	-0.474999	1.09382	0.914272	-1.29893
RAB6A	-1.05402	-1.13205	0.679598	0.679356	0.827117
RPS12	-0.63752	-1.23629	0.465596	1.35864	0.0495739
CDH2	1.06656	0.405231	-1.63571	0.14999	0.0139298
ROBO1	0.417258	-0.277857	1.52369	-0.683006	-0.980085
ACAD10	-0.924787	-0.576402	1.26429	0.888521	-0.651627
CTTNBP2	-1.23571	-0.591477	1.39326	0.0073918	0.426539
ENSMMUG00000006608	0.240355	1.42283	-1.31326	-0.431776	0.0818579
PBX1	-0.518408	-0.862899	1.30833	0.834068	-0.761092
RPL10A	-0.0154502	0.18911	1.177	0.237503	-1.58816
SCD5	-0.742093	-0.653478	-0.437065	0.157385	1.67525
CBFA2T2	-0.122681	0.121579	1.50495	-0.215956	-1.28789
SKA2	0.354605	1.56784	-0.536035	-0.403622	-0.982791
TIFA	0.0597231	0.0365287	1.59588	-0.937169	-0.754965
DIPK2A	-0.429293	-0.0653728	1.64586	-0.106583	-1.04461
ENSMMUG00000000249	-0.843268	-1.20588	0.915511	0.987547	0.14609
SPTAN1	-1.10041	-1.06454	0.757263	0.917888	0.489794
C17orf49	-0.430607	-0.122849	1.74822	-0.476021	-0.718749
RANBP1	0.0152614	-0.442296	1.64158	-0.17611	-1.03843
TPI1	-0.214924	-1.31543	0.420933	-0.291112	1.40054
ZNF737	-0.452055	0.123418	1.68815	-0.623066	-0.736447
PNPLA8	-1.04528	-0.680301	0.682985	-0.325635	1.36823
STMN4	0.141889	-0.746477	1.66474	-0.318747	-0.741405
LDHB	-0.616601	-0.658821	1.71753	0.0417323	-0.483841
HSPH1	0.217966	-0.0413409	1.16886	-1.58909	0.243602
MIER2	-0.421643	-0.658749	1.7603	-0.16895	-0.510955
SWAP70	-0.751007	-0.992312	0.213762	-0.0213001	1.55086
MPI	-0.646159	-0.745744	1.6119	0.339397	-0.559397
AP3B2	-0.172741	-0.988808	1.52346	-0.731405	0.369491
ENSMMUG00000031947	-0.772531	-0.760329	0.311442	-0.384823	1.60624
TBC1D25	-0.364229	-0.157878	1.66694	-0.12053	-1.0243
ATP8A1	-1.01699	-0.964659	0.720579	0.0302137	1.23086
PLEKHF2	-1.19508	-0.638918	1.43131	0.331445	0.0712476
CELF4	0.321077	0.961953	-1.6878	0.345503	0.0592672
WDR3	-0.590744	-0.52542	1.70509	0.0890656	-0.677995
RBM42	-0.662865	-1.34034	0.870561	0.993387	0.13926
ENSMMUG00000023397	-0.094505	-1.22913	1.10661	-0.6764	0.893425
PHACTR3	-0.95459	-0.298363	1.70205	-0.193476	-0.255618
PRTFDC1	0.0285377	0.573239	-1.66423	0.121041	0.941415
MAPK6	1.03671	0.267651	-1.5147	-0.413071	0.623416
RACK1	-0.883101	-0.0542677	1.50126	0.352263	-0.916149
DDX17	1.34209	0.332748	-1.23959	-0.695532	0.260285
KIF2A	1.01072	1.03737	-1.26143	-0.364478	-0.422183
FAM89B	-0.829409	-0.260139	1.67338	0.0780848	-0.661912
MAPK1IP1L	-0.639502	-0.643505	1.10351	-0.895923	1.07542
ENSMMUG00000040417	-1.14303	-0.559422	0.830678	-0.373593	1.24537
POGLUT1	-0.394415	-1.09334	1.37964	-0.554129	0.662247
PSMB4	-0.880155	-0.657082	1.24216	0.924416	-0.629338
ENSMMUG00000058758	-1.23032	-0.893245	0.811842	0.365155	0.94657
ENSMMUG00000049151	-0.746404	0.22345	1.62188	-0.831087	-0.267842
DDT	-0.77372	-0.814229	0.476118	-0.417126	1.52896
ENSMMUG00000056190	-1.37501	-0.60074	0.728189	0.154751	1.09281
MRFAP1	-0.94576	-0.959203	0.0562719	1.4109	0.437791
PRPF4B	1.12949	0.734558	-1.31699	-0.661197	0.114142
CENPE	0.402612	0.0623886	-1.69728	0.304699	0.927581
GIGYF1	-0.301714	-1.03852	0.91864	1.18488	-0.763287
ATXN2L	0.0328987	-0.592367	1.66498	-0.188911	-0.916604
RCOR3	-0.649996	-0.464786	1.627	-0.796093	0.283876
TSPAN7	-0.964189	-0.823783	-0.310318	0.832332	1.26596
CYTH2	-1.21511	-0.629706	1.42514	0.147034	0.272641
ENSMMUG00000056683	0.708149	1.36272	-0.679254	-1.02125	-0.370366
CALM3	-1.24734	-0.107402	1.55334	-0.101682	-0.0969128
MRAS	-0.842128	-1.18594	0.453864	0.318414	1.25579
NAA38	-0.0272473	-1.28601	1.10798	0.843155	-0.637877
AMZ2	-1.37545	-0.478849	1.30427	0.16002	0.390005
NELFE	0.250223	-0.910226	1.57057	-0.117916	-0.792648
HSPB1	-0.948859	-0.966115	0.43182	0.0782738	1.40488
CRMP1	-0.464137	-0.494962	1.37754	0.672371	-1.09082
LRP1	-0.467478	-1.34105	0.482007	0.00337684	1.32314
SPDL1	1.05426	0.758507	-1.07116	-1.03819	0.296584
PPFIA2	0.268992	0.0737384	1.47036	-0.665083	-1.14801
NPDC1	-1.00933	-1.06942	0.240102	1.13101	0.707637
ZNF821	-0.523411	-0.827096	1.72399	-0.192671	-0.180811
DPH2	-0.972042	-0.993204	1.07507	-0.0631932	0.953366
TRAF4	-0.202653	-1.11809	1.32301	-0.693401	0.69113
CREB5	0.76745	1.36987	-0.727887	-0.629128	-0.7803
TMEM147	-0.714467	-0.570186	1.60071	0.367421	-0.683481
EIF3L	-0.162288	-0.168997	1.59695	-0.0878924	-1.17777
BRSK1	-0.324599	0.0221439	1.59915	-0.150267	-1.14643
IQCJ-SCHIP1	0.0448943	0.396706	1.42757	-0.767592	-1.10157
SLC35B2	-0.788851	-0.791439	1.65764	-0.0217734	-0.0555778
EPB41L3	-1.32378	-0.824489	0.855351	0.632894	0.660028
FHL1	-0.45308	-0.997453	0.880349	-0.679853	1.25004
SERPING1	1.24181	-0.597775	0.850206	-0.385639	-1.1086
PHYH	-0.740831	-0.674866	1.2563	-0.758373	0.917768
CAP2	-0.232499	-0.83399	1.39838	-0.953303	0.621413
ENSMMUG00000016894	-1.01246	-0.818863	1.47615	0.00112227	0.354055
PYCR1	-0.470181	-0.451377	1.31181	0.747797	-1.13805
UBQLN4	-0.113245	-0.701034	1.40006	-1.11872	0.53294
MORF4L1	1.5292	0.293432	-1.13814	-0.190866	-0.493624
GNAZ	-0.929641	-0.857207	1.53773	0.0730228	0.176092
ENSMMUG00000018740	-0.540946	-1.3356	-0.0808995	1.00351	0.953931
STX2	-1.25904	-0.714921	0.788329	1.13105	0.0545833
SPART	1.43409	0.613964	-0.978633	-0.670507	-0.398914
DNAJB2	-0.583924	-1.00179	0.143445	-0.171838	1.61411
ENSMMUG00000056012	-0.927295	-0.134729	1.66139	-0.601453	0.00208536
AP1M1	-0.380873	-1.12106	0.151764	-0.236962	1.58713
ENSMMUG00000030465	-0.668624	-1.24341	1.26746	0.0119165	0.632657
EIF3B	0.35625	-0.0614762	1.48225	-0.672468	-1.10455
PPP1R14C	-0.555488	-0.231714	1.47256	-1.12831	0.44295
PTBP3	0.521516	1.24939	-0.91092	-1.12551	0.26552
SEPHS1	-0.241649	0.140188	1.5324	-0.19112	-1.23982
ZNF511	0.778118	-0.305476	1.30884	-0.91633	-0.865153
RAB13	-1.39044	-0.739657	0.74311	0.74603	0.640954
ENSMMUG00000002320	-1.26838	-0.777206	0.892679	0.979989	0.172921
CERS2	-0.431713	-1.17419	0.474222	1.45175	-0.32006
PTBP1	-1.31187	-0.520447	1.32868	0.011071	0.492558
ZEB1	-0.896022	-1.0223	1.34881	-0.00728655	0.576802
PSAP	-0.945574	-1.06395	0.173864	1.27759	0.558061
GLCCI1	0.922554	0.969322	-1.32807	-0.66045	0.0966454
SNAP25	-0.175916	0.142239	1.59575	-0.479092	-1.08299
ARID4B	0.624488	1.27496	-1.31423	-0.0851901	-0.500035
LY6G5B	-0.63676	-0.560302	1.65837	0.22979	-0.691095
RSRC2	0.290081	1.36387	-1.24565	-0.662791	0.254493
AKR1A1	-0.493155	0.0261692	1.43353	0.302227	-1.26877
PRKACB	-0.247071	-0.545636	1.10329	-1.24519	0.93461
PSMA5	-0.791612	-0.587074	1.65974	0.201866	-0.482919
ENSMMUG00000061536	0.0473381	-0.291792	1.63118	-0.312346	-1.07438
TOX3	0.321816	-0.0609342	-1.6008	1.13497	0.204945
MBD3	-0.359849	-1.25558	0.541108	1.381	-0.306684
SEM1	-0.567198	0.264162	-1.373	0.438737	1.23729
DEPDC5	-0.382515	-0.818829	1.4483	0.602866	-0.849818
C1H1orf35	0.415419	-1.1486	1.04589	0.66989	-0.982603
DPM2	-0.61191	-1.18622	1.46496	0.0748176	0.258345
PSMA7	-0.0895773	-1.62225	1.06558	0.2337	0.412547
CXXC1	-0.861597	-0.583151	1.48762	0.571708	-0.614584
PRPSAP1	0.728529	-0.754273	1.35125	-0.349751	-0.975759
PTPN4	-0.531029	-0.485537	1.51916	-0.975215	0.472621
DCLK1	0.894936	1.27141	-0.750128	-0.800466	-0.615756
AP2A2	0.327019	-1.35856	1.27591	-0.563519	0.319155
PLEKHO1	0.570448	-0.364888	1.43447	-1.08354	-0.556484
ASRGL1	0.706745	-1.09733	1.31596	-0.723899	-0.201484
RPL27	-0.0946219	0.124811	1.61065	-0.687962	-0.952878
INA	0.956167	1.17587	-0.904162	-0.870585	-0.357287
NDUFB5	-0.381381	-1.52536	1.04803	0.255082	0.603629
MMD	0.0300926	0.0539201	1.60317	-0.880625	-0.806558
FKBP4	-0.610898	-0.473202	1.66705	-0.767872	0.18492
ENSMMUG00000064215	-0.994553	-1.1463	0.400401	0.975033	0.765414
HSP90B1	-0.037883	1.10916	-0.84058	-1.1241	0.893396
CST3	-0.530712	-0.573406	-0.427076	-0.243085	1.77428
PDE9A	-1.1697	-0.523113	1.13084	0.959756	-0.397783
CAT	-1.16498	-0.852735	0.108741	1.15664	0.752333
RAB6B	-0.695111	-0.506231	1.59173	0.375217	-0.765607
LDLRAD3	-0.272852	0.203878	1.56235	-0.341731	-1.15164
PCDHGB5	-0.880642	-0.850487	-0.325483	0.653888	1.40272
MRPL52	0.49701	-0.15284	1.4068	-0.545648	-1.20532
UBXN1	-0.707525	-0.22744	1.67682	0.053785	-0.795644
EGR1	-0.0861873	0.300678	1.33818	-1.44941	-0.103265
KIF15	0.868806	1.1815	-0.416776	-0.403664	-1.22987
RAB11B	0.206685	0.0427566	-1.42861	1.37039	-0.191217
HMG20B	-0.636343	-0.476581	1.63495	-0.789518	0.267496
ACLY	0.0585523	-0.125305	1.64984	-0.845485	-0.737601
ITFG2	-0.299886	-0.629563	1.02674	1.05924	-1.15652
UBE2E3	0.560174	-0.401011	1.41605	-0.413745	-1.16147
EEF2	0.647769	-0.0188561	1.27026	-0.664064	-1.23511
VDAC2	-0.710116	-0.505308	1.23481	0.916444	-0.935829
AKIRIN2	-0.648654	-1.18355	1.15741	0.890195	-0.215406
MYL6B	-0.409	-0.669339	0.769286	1.3261	-1.01704
TWSG1	-1.2466	-0.748085	0.459837	1.26594	0.268904
HNRNPL	-0.249215	-1.4475	1.26152	-0.0621326	0.497336
ENSMMUG00000006397	0.287043	-0.0109555	1.46892	-1.21691	-0.528105
SON	1.39029	0.704289	-0.922801	-0.714282	-0.457497
CEP112	1.2369	0.812148	-1.19055	-0.54012	-0.318371
NEDD9	-1.29646	-0.154572	1.04401	0.952685	-0.54566
ENSMMUG00000012843	-0.852776	-0.561131	1.63407	0.252867	-0.473035
SEPTIN5	-0.62111	-0.53671	1.04525	1.11158	-0.999007
CDK1	-1.04329	-0.949691	0.83794	0.0116509	1.14339
SMARCE1	0.971563	1.06698	-0.104297	-0.832774	-1.10147
FYN	0.242692	-0.256462	1.57336	-1.08287	-0.476721
PBX2	1.24441	0.891164	-0.416041	-0.913574	-0.805958
AURKB	-0.346764	-0.0577439	1.68763	-0.32132	-0.961805
LMO3	1.09219	0.886203	-1.27398	-0.0777701	-0.626647
ATF4	-0.955856	-0.426473	1.08229	-0.768702	1.06874
PARD3	1.12809	1.03396	-0.877123	-0.464293	-0.82063
FUBP1	1.19101	0.940304	-0.363072	-0.851217	-0.917025
CDCA2	0.961085	1.12555	-0.898282	-0.209165	-0.979184
ENSMMUG00000003073	-0.635752	-0.433747	1.36783	0.714617	-1.01294
TRAPPC4	-0.168489	-1.05195	1.19551	-0.83473	0.859655
RETREG2	-1.20176	-0.858476	1.13129	0.232614	0.696332
CARHSP1	-1.01762	-0.935708	1.00234	-0.086666	1.03764
CEP85	-1.12834	-0.99037	0.643721	0.388315	1.08667
ENSMMUG00000003029	-0.389176	-0.640286	1.734	-0.655273	-0.0492682
BCLAF1	0.347353	1.6007	-0.582881	-0.833413	-0.531762
GPSM2	-0.287984	1.09654	-1.49879	0.0059358	0.684294
SLIRP	-0.281665	-1.47079	1.12428	-0.0707167	0.698891
PLXNB2	-1.02444	-0.757753	1.23854	0.86114	-0.317488
CTSB	-0.587975	-1.04684	0.793779	1.30783	-0.466802
COX7B	0.135746	-0.855642	1.67173	-0.446077	-0.505755
FMC1.LUC7L2	0.503241	0.927424	-1.3136	0.701149	-0.818209
HTATSF1	0.5487	1.18902	-1.39315	0.205168	-0.549733
NUDT4	0.374334	-0.310139	1.50466	-0.41767	-1.15119
DIAPH3	-1.19303	-0.712024	1.34291	0.0483732	0.513765
SYNE2	1.39339	0.666168	-0.344548	-0.970023	-0.744991
YES1	0.845055	0.67178	-1.12923	-1.05529	0.667682
PARPBP	0.140705	1.52676	-1.16041	0.041532	-0.548589
RPL3	-0.0619513	-0.131544	1.53428	-0.0679012	-1.27288
MAPRE2	-0.66441	0.0878515	1.52669	0.144893	-1.09502
EDF1	-1.01145	-0.621437	1.51528	-0.320534	0.438143
ATXN7L3	0.513098	-0.542402	1.21244	0.206117	-1.38926
TUBB3	0.38618	0.129507	1.20018	-0.17912	-1.53674
MRPL49	-1.16561	-0.494155	0.899772	-0.425846	1.18584
CERK	-0.527226	-0.54022	0.808429	1.30064	-1.04162
SPATS2	-0.228116	-0.775985	1.31487	0.730233	-1.041
ENSMMUG00000064232	-0.16559	-0.369975	1.09311	-1.39353	0.83599
PSIP1	-0.62866	0.790495	-1.35167	1.06664	0.123194
ARHGDIA	-1.30376	-0.822375	0.451579	0.931879	0.742681
KDM1A	0.18983	0.154697	1.33924	-0.238172	-1.44559
WBP2	-1.29515	-0.865923	0.676855	0.66087	0.823343
CEP89	0.412411	-0.798568	1.4172	-1.08659	0.0555454
TMEM97	-1.09637	-0.686507	0.873141	-0.303584	1.21332
CDIPT	0.0714307	-0.131822	1.40918	0.0611735	-1.40996
RPL31	-1.09914	-0.620542	1.03723	1.0822	-0.399752
MYEF2	0.968972	1.16156	-0.377147	-0.749272	-1.00411
RAB23	0.0696577	-0.565374	1.70839	-0.502406	-0.71027
EMC9	-1.0207	-0.178486	1.6064	0.158948	-0.566156
BCKDK	-0.398964	-0.707733	1.00634	1.12771	-1.02736
ENSMMUG00000059486	-0.331509	-0.309537	-1.29037	0.602364	1.32905
DHCR24	0.327602	0.142594	1.43397	-0.912375	-0.99179
COPS6	-0.871316	-0.498482	1.44767	0.62948	-0.707348
CLIC1	-1.01854	-1.02393	0.883595	1.06001	0.0988689
ZSCAN18	-0.227363	-1.5304	0.314026	1.20425	0.239485
STAR	-1.0307	-0.936148	1.23652	0.729579	0.000749575
PSPC1	0.0142579	1.56318	-1.20797	-0.0647306	-0.304736
PPP1R18	-0.112285	-0.742526	1.31609	0.663105	-1.12438
MAGED2	0.574065	-0.331376	1.40974	-0.50373	-1.1487
ENSMMUG00000012019	-0.800044	-0.817366	0.749938	-0.502529	1.37
HSDL1	0.235169	-0.596313	1.64186	-0.448924	-0.83179
KIF5B	-0.683703	-0.0430168	-1.08885	0.31746	1.49811
AP3S1	0.569088	1.05722	-1.59431	-0.105704	0.0737057
ENSMMUG00000001858	0.892798	0.983543	-0.945535	0.208511	-1.13932
PHAX	-0.258918	1.23075	-1.41902	-0.166662	0.613847
PAN2	-0.159501	-0.530851	1.76311	-0.602744	-0.470012
RRP36	-0.247557	0.242713	1.54997	-0.395954	-1.14918
TMEM106B	0.195715	-1.048	1.16894	-1.00886	0.692211
ENSMMUG00000052747	-1.09716	-0.481452	1.4628	-0.399226	0.51504
IP6K2	0.221315	-0.394193	1.37739	-1.36809	0.163587
ENSMMUG00000005482	1.25783	0.909765	-0.596207	-0.793279	-0.778105
ZYX	-0.838255	-1.23377	1.16294	0.385675	0.523412
AHSA1	0.221347	-0.310555	1.51282	-1.23744	-0.186172
SRI	-0.950613	-0.961021	-0.158003	1.09008	0.979555
DPYSL5	-0.796697	-0.73946	0.321226	1.60176	-0.386833
ARL8B	-0.683937	-1.33412	1.13793	0.627358	0.252774
MAN1A2	0.580068	1.36315	-0.466603	-1.23702	-0.239594
VGLL4	-0.546992	-1.24177	0.587085	-0.138127	1.3398
SNRPD1	0.762008	1.26388	-1.11382	-0.743625	-0.16844
LUC7L3	1.30683	0.645256	-0.791187	-0.0437838	-1.11712
PSMB2	-0.201405	-0.292676	1.7024	-0.25375	-0.954573
CAPZB	-0.610105	-1.14438	1.04699	-0.343282	1.05077
KPNB1	1.32274	0.586554	-1.22759	-0.0518961	-0.629799
DEK	1.49315	0.568469	-0.609584	-0.82979	-0.622248
SLC25A11	-0.928138	-0.766329	0.545993	1.4669	-0.318427
MAPK3	-0.111207	-1.16638	1.14975	0.869241	-0.741412
ASCL1	-0.0584489	0.515341	-1.64969	0.982491	0.210312
ENSMMUG00000010236	-1.26435	-0.782041	0.478793	1.19118	0.376412
SERBP1	1.31022	0.765877	-1.10833	-0.478363	-0.489404
SYNCRIP	0.558515	1.44305	-0.24896	-0.8136	-0.939007
KIF23	-0.209582	1.47143	-1.3372	0.0346134	0.0407332
LSM2	0.0146492	-0.620953	1.72667	-0.509082	-0.61128
BIRC2	-0.301633	1.05867	-1.39842	0.880591	-0.239212
VOPP1	1.16579	0.986571	-0.716542	-0.469543	-0.96628
AP2M1	-1.07197	-0.72119	1.38534	-0.201325	0.609147
SUPT16H	1.43684	0.597872	-1.02805	-0.418301	-0.588366
MIDN	0.634458	-0.0650604	1.28628	-0.598498	-1.25718
TALDO1	-1.17225	-0.899017	0.546848	1.18448	0.339937
PAPOLA	0.812004	1.1677	-0.780478	-0.0300103	-1.16922
ABAT	0.0269368	1.29843	-0.991257	-0.965475	0.631368
ANXA5	-0.270936	-0.246145	-1.21004	0.188889	1.53823
BICD2	0.584617	0.817653	-1.62873	-0.281281	0.507738
TACC3	-0.896122	-1.19678	0.250011	0.966417	0.876476
G3BP1	0.946891	1.20443	-0.968244	-0.67932	-0.503757
SNRPB	0.429216	-0.570758	1.56971	-0.769715	-0.658452
CDCA3	-1.1642	-0.765664	0.717271	1.2422	-0.0296095
AP2A1	-0.855703	-1.09656	-0.0514215	0.835578	1.16811
CHD1L	0.12581	1.1	-1.3185	-0.671792	0.76448
ENSMMUG00000057449	-0.750741	0.121833	-1.1383	1.41479	0.35242
ASPM	-0.0323196	1.17333	-1.26587	-0.648925	0.773784
GOLGA4	1.34666	0.399894	-1.23545	-0.685461	0.174357
OBI1	0.991343	0.970791	-1.28067	-0.658918	-0.0225435
DHX36	0.329827	0.290419	-1.67617	0.0589944	0.996925
WBP11	1.2972	0.606996	-1.0551	-0.911938	0.0628425
CTNND1	-0.832517	-0.303854	1.70973	-0.0346675	-0.538696
WDR43	1.0001	1.0804	-1.0521	-0.827903	-0.200498
DHX29	-0.282503	0.471304	-1.57067	1.06259	0.319279
BTG1	0.384042	-0.275713	-1.62179	0.734318	0.779144
SMC3	1.15544	0.889973	-0.80518	-1.09735	-0.142879
NDUFA12	-0.78507	-0.765688	0.924947	1.24726	-0.62145
SMARCC1	1.33756	0.763312	-0.58123	-1.0204	-0.499245
PSMC4	0.128087	-0.16642	1.53486	-0.258209	-1.23832
ENSMMUG00000059728	-0.139567	0.536296	-1.54217	-0.00112796	1.14657
DTYMK	-0.492595	-0.830797	0.526798	1.51013	-0.713532
ATP1A3	0.791679	0.799997	-1.39301	-0.721037	0.522374
CELF1	0.629321	1.23248	-0.405041	-0.0727066	-1.38405
LDOC1	0.145181	-1.15826	1.57455	-0.264551	-0.29692
TPGS2	-0.402855	0.290406	-1.53778	0.708929	0.941295
TMEM14B	0.00272248	0.0350066	-1.42597	1.40185	-0.0136108
IRF2BP2	0.890469	1.26688	-0.548516	-0.745046	-0.863784
ST8SIA2	-0.0655273	0.194958	1.52529	-0.465312	-1.1894
ZNF706	-1.16344	-0.81416	-6.66628e-05	0.870579	1.10709
RHOBTB3	0.977574	1.15404	-0.45153	-1.06062	-0.619471
ELF2	0.703358	1.35081	-1.08541	-0.6133	-0.355461
PNMA1	-1.16818	-0.97271	0.455817	0.666905	1.01817
XPO1	0.207875	0.327436	1.35938	-1.26885	-0.625848
NPM1	0.412889	1.34325	0.226677	-0.927957	-1.05486
MED13L	0.775216	0.825917	-1.20295	-0.970632	0.572445
AP1S1	0.178474	0.180625	1.24914	-0.068603	-1.53963
SHCBP1	-0.761598	0.00313577	-1.20602	0.848271	1.11621
WASF2	-0.920496	-1.18676	0.386165	1.09939	0.6217
MED28	1.25881	0.887622	-0.846475	-0.468256	-0.831704
PCNA	0.150147	-0.0106213	1.37471	-1.44307	-0.0711681
CCDC18	0.151134	0.290183	-1.6483	0.130378	1.0766
CCAR1	1.41072	0.512204	-1.21962	-0.271829	-0.431475
FDX1	0.322945	0.881949	-1.58402	0.707676	-0.328549
PSD3	1.42642	0.495927	-1.15693	-0.172973	-0.592437
SERPINE2	-0.619736	-0.714514	-0.327449	-0.0684705	1.73017
LBH	0.212586	1.3372	-1.05377	-0.93111	0.43509
SMC1A	1.0349	1.00005	-1.28216	-0.404744	-0.348044
ENSMMUG00000064286	0.174765	1.22652	-1.54949	-0.089026	0.237231
MPHOSPH9	1.01005	1.16436	-0.878584	-0.727198	-0.568628
ATRX	0.631718	1.40228	-0.916145	-0.26703	-0.850827
AKAP9	0.893042	1.10696	-1.23217	-0.0974678	-0.670363
SCAF11	1.36567	0.744015	-0.924883	-0.482614	-0.702186
ACTR3	0.259718	1.59474	-0.369986	-0.467793	-1.01668
SPC25	0.230426	1.60316	-0.923618	-0.220781	-0.689184
JAKMIP2	1.07376	0.929215	-1.04962	-0.93898	-0.0143724
SENP6	1.08635	0.646786	-1.21164	-0.892194	0.370695
U2SURP	0.748632	1.34744	-0.381459	-0.922556	-0.792053
ELOVL5	-0.720594	-0.6684	0.883028	-0.778096	1.28406
NUP50	0.608133	0.689682	-1.73989	0.342663	0.0994109
RSF1	0.848674	0.716591	-1.41494	-0.688713	0.53839
PRR11	0.162747	1.33983	-1.37728	-0.432532	0.307226
UFSP2	0.193288	1.3553	-0.663345	0.361721	-1.24697
USP1	-0.130113	0.0133183	-1.56846	0.615928	1.06933
CDC5L	1.08933	1.06625	-1.0007	-0.641521	-0.513357
DDAH1	-1.10856	-0.823522	0.25783	0.278164	1.39609
GPRC5B	-0.768756	-1.27465	0.20679	1.08403	0.752588
UBXN2A	0.899713	1.08145	-1.34627	-0.37661	-0.258278
TBL1XR1	0.546818	1.08866	-1.0458	0.495182	-1.08485
ZNF638	1.16047	0.997099	-0.909855	-0.786447	-0.461268
CUEDC1	0.444149	0.407804	-1.65629	-0.131521	0.935858
KIF4A	0.82868	1.04554	0.10678	-1.34161	-0.639394
MSANTD3.TMEFF1	0.549409	0.0545501	1.32051	-0.739045	-1.18543
H1.0	-0.654024	0.340743	-1.30131	1.28651	0.328083
DARS1	1.00832	0.859998	-1.46985	-0.242968	-0.155501
KPNA1	1.49543	0.540431	-0.733531	-0.444357	-0.85797
CLIC4	0.582619	1.45425	-0.353302	-0.798701	-0.884862
TOP2A	0.443234	1.27984	-1.34924	0.184048	-0.557887
MCAM	0.498141	0.614813	-1.47965	-0.564061	0.930762
EIF5	0.663627	1.35453	-0.812364	-1.01396	-0.191834
SSBP1	-0.113098	1.19616	-1.52255	0.485908	-0.0464257
MYH10	1.12722	1.02811	-0.625739	-1.00037	-0.529228
CENPC	-0.152566	1.55673	-0.685695	-1.00151	0.283037
PIAS1	1.1557	0.923421	-0.997348	-0.881347	-0.200428
MCL1	-0.588615	0.294267	-1.01753	-0.258139	1.57001
YME1L1	0.671185	0.79431	-1.58258	0.509743	-0.392658
MOB3B	1.28581	0.823214	-1.04847	-0.590866	-0.469688
H1-10	-0.537555	-0.459354	-0.901431	1.6146	0.283736
FBXW7	0.152903	1.47615	-0.739193	0.208998	-1.09886
SH3GLB1	0.498705	-0.177451	-1.60942	0.256864	1.0313
CHD7	1.3122	0.667668	-1.01275	-0.895281	-0.0718334
FANCM	1.14369	0.962954	-0.357801	-1.10619	-0.642656
NAP1L3	0.767718	0.871058	-1.43054	-0.64437	0.436133
DLL1	0.494071	0.579014	-1.70763	0.706703	-0.0721577
SPEN	0.996407	0.922299	-0.464939	-1.39158	-0.0621836
SOX8	-0.600637	-0.241519	-0.867774	0.0285435	1.68139
RFC1	0.450225	-0.00993473	-1.72257	0.703733	0.578545
ZBTB10	1.14202	0.946117	-0.350628	-1.1588	-0.578701
TPR	1.43386	0.528378	-1.03747	-0.746052	-0.178714
NDN	1.43787	0.615483	-0.466496	-0.597157	-0.989698
DIS3L	-0.0974222	1.13043	-1.50101	0.652388	-0.184391
RDX	-0.0402763	0.955597	-1.67233	0.346931	0.410079
VIM	1.36317	0.656233	-0.563116	-0.319709	-1.13658
PPP1R12A	0.0981652	0.693954	-1.57709	-0.204787	0.989762
PDCD4	1.13965	0.984415	-0.932919	-0.319538	-0.871604
P3R3URF-PIK3R3	0.210844	1.57509	-0.60967	-1.04152	-0.134747
XPA	0.522483	1.27651	-1.00442	-1.01897	0.224398
PROSER1	1.26495	0.888922	-0.634378	-0.922324	-0.597167
ENSMMUG00000028699	-0.208598	-0.513179	-0.80203	-0.209921	1.73373
ZRANB2	0.929082	0.689247	-1.50305	0.387304	-0.502586
ENSMMUG00000022140	0.838415	1.0748	-0.564184	0.00135639	-1.35039
MNAT1	0.996713	1.10446	-0.93789	-0.921114	-0.242168
PID1	1.08537	0.352711	-1.18114	-0.925168	0.668232
HNRNPLL	-1.3728	-0.620847	1.18366	0.426121	0.383859
KIF18A	0.952281	0.877545	-0.896759	-1.2026	0.269535
CENPU	-0.248355	1.37565	-0.800023	-0.985924	0.65865
HELLS	1.42896	0.676056	-0.828148	-0.638739	-0.638129
RMI1	0.988924	1.1952	-0.684068	-0.765666	-0.734391
LZIC	0.356843	1.57903	-0.471592	-0.938121	-0.526164
CCNT2	0.791362	1.28457	-0.37019	-0.596135	-1.1096
KIAA0408	0.679451	1.40769	-0.540691	-0.587957	-0.958494
PPP4R3B	0.962233	0.949755	-0.260124	-0.217622	-1.43424
PRRC2C	1.02317	0.713084	-0.297909	-1.53203	0.0936783
RBM27	1.23372	0.87685	-0.772257	-0.998672	-0.339638
TLK2	0.573952	1.25557	-0.934561	-1.08788	0.192922
PRPF40A	1.05116	1.04367	-0.793049	-0.244952	-1.05683
QSER1	-0.65761	0.327845	1.61879	-0.578212	-0.710813
PRPF38B	0.93267	0.133546	-1.68382	0.101026	0.516574
RB1CC1	0.453456	1.52042	-0.921086	-0.726549	-0.326239
CENPJ	1.14346	1.04074	-0.618251	-0.759988	-0.805953
STRAP	0.198097	1.62229	-0.97526	-0.320908	-0.524223
ENSMMUG00000061458	0.0955837	1.56058	-0.343008	-0.120099	-1.19306
GOLGB1	0.436868	0.928981	-1.6401	-0.193484	0.467735
THOC2	1.07687	0.657617	-0.877136	0.368508	-1.22586
LANCL2	0.312519	1.48249	-1.24019	-0.356714	-0.198103
OSBPL8	0.689385	1.35233	-0.371283	-1.12064	-0.549785
LSM8	-0.141534	1.04999	-0.903545	1.0127	-1.01761
KMT5B	0.688149	1.33533	-0.637773	-1.12673	-0.258974
SNW1	0.265601	1.59743	-0.856281	-0.76576	-0.240988
STK17B	0.219283	1.57078	-0.819727	-0.898597	-0.0717369
NIPBL	1.39813	0.710617	-0.508161	-0.776743	-0.823839
ENSMMUG00000056792	0.88672	0.102835	1.03684	-0.819587	-1.20681
ENSMMUG00000029987	-0.451942	-0.352803	-1.24733	1.0966	0.955468
ENSMMUG00000015095	0.761676	0.967621	-1.4579	0.265084	-0.536478
NUDT21	0.582248	0.986022	-0.873732	-1.26491	0.570377
UPF3A	0.917048	1.10825	-0.896526	-0.069411	-1.05936
DDX21	-0.827445	0.388465	-1.17184	1.30232	0.308499
CANX	0.0613733	0.390163	-1.51106	-0.17714	1.23666
KIF21A	0.718758	1.11099	-0.8785	0.240223	-1.19147
JAM3	1.5178	0.513856	-0.536439	-0.632197	-0.863018
CWC15	-0.264487	1.41441	-0.900575	-0.862021	0.61267
SLTM	1.33655	0.757604	-1.04171	-0.507812	-0.544635
ENSMMUG00000065104	0.109473	0.711394	-0.494268	-1.4251	1.09851
METAP2	-0.371481	0.842526	-1.2345	-0.435813	1.19927
TPRKB	-0.456007	1.15208	-1.21008	-0.401918	0.91593
TAOK1	0.857654	1.25331	-0.482102	-1.07387	-0.554998
GALNT1	1.10604	0.447686	-1.14896	-0.968619	0.563846
GSK3B	0.806305	1.28568	-0.306673	-0.824845	-0.960464
FRA10AC1	-0.312009	1.09008	-1.51108	0.0815717	0.651438
TNRC6C	0.965617	0.339574	-1.66411	-0.0640493	0.422971
SOX21	0.583986	0.524522	-1.77625	0.387902	0.279839
ASAP1	0.127688	1.51288	-0.628184	-1.13381	0.121427
ARL5A	-0.475633	1.32688	-1.01699	-0.611813	0.77755
MYCN	0.566411	1.43765	-0.828258	-0.245057	-0.930744
SMN2	1.07573	0.0733543	-1.53536	-0.257145	0.643419
TCF12	-0.287342	-0.462275	-0.848143	-0.125234	1.72299
PPP4R3A	1.31485	0.623007	-0.573382	-1.24052	-0.123949
GPC4	0.674009	1.15585	-0.640807	0.144446	-1.3335
RIF1	0.578134	1.48185	-0.617263	-0.566238	-0.876487
CHURC1-FNTB	-0.195772	1.01757	-1.58676	0.141816	0.623146
PSMC1	1.00977	0.492879	-1.62574	0.269901	-0.146803
CCNJ	1.15597	0.93206	-0.297138	-0.668425	-1.12246
ARHGAP11A	-0.524508	0.609663	-1.52231	0.679341	0.757811
FAM110A	0.925062	1.15079	-1.01626	-0.193805	-0.865786
QKI	0.799353	-0.216539	-1.36671	-0.362709	1.1466
CUL5	-0.493097	0.945723	-0.97306	-0.683232	1.20367
EIF3A	0.881238	0.125456	-1.10074	1.04493	-0.950878
ENSMMUG00000055357	-0.147323	0.773076	-1.65842	0.29601	0.736658
KBTBD2	0.127322	1.44716	-0.0225142	-0.190885	-1.36109
OLA1	0.65266	1.30958	-0.896766	-1.02631	-0.0391567
SYT1	0.725074	-1.00959	1.30356	-0.853384	-0.165663
ENSMMUG00000018360	0.949997	1.21062	-0.90639	-0.517973	-0.736253
CBX2	1.22145	0.720535	-0.29662	-0.299575	-1.34579
PICALM	0.819389	1.31791	-0.632437	-0.580034	-0.924826
TGS1	0.991577	0.314536	-1.32683	-0.750287	0.771
XRN2	1.26386	0.890334	-0.658234	-0.57806	-0.917899
ZNF426	0.482672	1.44532	-1.09665	-0.670495	-0.16085
STRIP1	0.858568	0.47305	-1.65502	-0.190225	0.513626
UBE3A	-0.120441	0.689817	-1.36715	1.212	-0.414225
TUT4	1.36208	0.63149	-0.637116	-1.13651	-0.219942
CEP120	0.730453	1.36229	-0.435424	-0.983002	-0.674321
RDM1	0.28728	0.440538	-0.711707	1.26016	-1.27627
CEP295	0.26403	0.863814	-1.40363	-0.628893	0.904676
CWC22	0.351633	1.2066	-1.55578	0.000807745	-0.00326414
LRRCC1	-0.240678	0.485957	-1.56261	0.213407	1.10392
HCFC1	0.634844	1.41314	-0.482998	-0.515917	-1.04907
SGO2	-0.0936608	0.89545	-0.819113	-1.11346	1.13078
USP47	1.01403	1.05886	-0.468362	-0.387562	-1.21696
SH3BGRL	0.614459	1.32119	-0.916447	-0.00084994	-1.01835
CCDC173	0.383183	0.393325	-1.76362	0.718194	0.268916
USP5	-0.429322	-0.319017	-1.22799	1.34385	0.632475
NCAM1	0.313124	1.52947	-0.524852	-1.11657	-0.201173
MKRN1	0.19038	0.898931	-1.63391	0.683231	-0.138635
POC5	0.893918	0.411136	-1.68154	-0.0700611	0.446544
METTL21A	1.18387	0.843171	-1.21969	-0.595995	-0.211354
ZWILCH	-0.173634	0.0744636	-0.944267	-0.602622	1.64606
LIN54	0.0364515	0.816766	-1.19318	-0.791808	1.13178
FAM98B	0.905781	1.22746	-0.401086	-0.94308	-0.789074
HJURP	1.17774	0.91961	-1.10056	-0.670471	-0.326324
CADM1	0.254908	1.56022	-0.296482	-1.11967	-0.398971
BOD1L1	-0.350058	0.645982	-0.579446	-1.10006	1.38358
ZNF528	-0.528746	1.54779	-0.885594	0.448827	-0.582278
NDUFA5	0.543012	0.236759	-1.24202	-0.768784	1.23103
FCF1	0.455856	1.0378	-1.56691	-0.322027	0.395284
CDK17	-0.174287	-0.282061	-1.31038	0.330053	1.43668
CASP8AP2	1.11242	0.373942	-0.666233	0.549753	-1.36989
PHF14	1.03722	1.04223	-0.404277	-0.469212	-1.20596
COP1	0.528232	0.589847	-1.03179	1.03034	-1.11663
EFNB1	0.894848	1.0231	-0.0399588	-0.498821	-1.37917
TASOR	0.205641	1.31399	-0.793719	0.454866	-1.18078
CEP290	0.817204	1.17526	-1.30755	-0.284516	-0.400396
GKAP1	-0.158174	0.698309	-1.63541	0.87394	0.221339
CERS6	0.775355	1.20667	-0.107465	-1.23244	-0.642113
ICE1	0.804659	0.345136	-1.61442	0.741781	-0.277157
IFT81	1.32871	0.784182	-0.993731	-0.6135	-0.505664
FHOD3	0.992773	0.952547	-0.308803	-0.238343	-1.39817
ENSMMUG00000046228	-0.377427	0.794247	-1.55608	0.290005	0.849255
LARS1	0.996539	0.974458	-0.8544	-1.15157	0.0349743
UHMK1	0.871559	0.210233	-1.64687	-0.120173	0.68525
ZC3H13	1.23032	0.869346	-0.649182	-0.366657	-1.08383
DEPDC1B	1.32194	0.786532	-1.0179	-0.584205	-0.506367
ARL3	0.697887	1.36092	-0.62432	-1.06524	-0.369244
CSPP1	0.785518	0.732738	-1.5838	-0.376797	0.442339
MYO5A	1.33963	0.773074	-0.449552	-0.725246	-0.937907
DNMT3A	1.21362	0.840259	-0.376592	-0.469449	-1.20784
ZUP1	0.350446	0.91124	-1.64773	0.551691	-0.165643
ENSMMUG00000065238	0.593331	0.324664	-1.77797	0.353882	0.506095
WBP1L	0.175268	0.735357	-1.27542	1.11387	-0.749074
UBE4A	0.226794	0.660148	-1.70183	0.784609	0.0302824
GORASP2	0.285556	1.35489	-0.850633	0.328705	-1.11852
CASD1	1.02778	0.41656	-0.991635	-1.14405	0.691349
POLA1	0.481492	0.644669	-1.51024	-0.514362	0.898436
STK4	0.377822	0.249869	-1.67335	0.0495236	0.996132
IFT57	0.579183	1.32449	-1.14124	0.0170218	-0.779455
MED7	0.436856	1.37346	-1.14094	0.110829	-0.78021
GGNBP2	0.117834	1.19055	-0.782771	0.690571	-1.21618
AMD1	1.27401	0.852594	-0.423428	-0.750895	-0.952283
SOX4	-0.36933	0.537072	-1.54481	1.03533	0.341742
CAPZA1	0.73138	1.30051	-0.269277	-0.609411	-1.1532
AK3	-0.191475	0.238662	-1.32042	-0.185669	1.4589
CEBPZ	0.0588268	1.47559	-1.22633	-0.519991	0.211904
ZC3H6	1.19835	0.916915	-0.315587	-0.945611	-0.854071
CCDC66	0.876461	0.647393	-0.824291	-1.32152	0.621956
AEBP2	0.904774	0.671599	-1.08914	-1.08784	0.600603
PLEKHB2	-0.823855	0.348969	-1.27282	1.03534	0.712369
ESF1	0.446498	0.149083	-1.18936	1.34273	-0.748942
DAPK1	-0.214126	0.963819	-1.59633	0.666787	0.179845
EPC2	0.389168	1.20025	-0.167491	-1.5383	0.116372
ERP44	0.00289058	1.05603	-1.56176	0.65097	-0.148124
NUDCD1	1.40129	0.699632	-0.521525	-0.907343	-0.672051
LFNG	0.327077	0.787832	-1.34242	-0.736065	0.963572
HEXIM1	0.988261	0.862769	-1.4419	-0.445594	0.0364679
NKTR	1.20255	0.426553	-1.35969	0.3587	-0.628112
JUND	0.51179	1.29121	-0.173408	-1.41187	-0.217714
WIPF2	0.87772	1.02533	-1.37195	-0.54395	0.0128494
DNTTIP2	0.0410586	0.815401	-0.464533	-1.42902	1.03709
RFK	-0.217374	1.51222	-1.28993	-0.0339816	0.0290635
RUVBL1	0.969773	1.16175	-0.71851	-1.01901	-0.394005
RO60	1.13249	0.341707	-1.58674	0.25201	-0.13947
VPS54	0.603033	1.39646	-0.312098	-1.13108	-0.556322
MBIP	0.869138	1.27202	-0.543104	-0.964402	-0.633656
RBM12B	0.303981	1.22783	-0.617479	0.437473	-1.3518
CEP83	-0.0762624	0.859114	-1.32757	-0.547794	1.09251
TASOR2	0.72747	1.35967	-0.370673	-0.782213	-0.934254
EPB41L2	0.458354	-0.27114	-1.41634	-0.0764587	1.30558
SEL1L	-0.36939	1.32339	-1.40416	0.085068	0.365094
CCDC191	0.564516	1.27381	-1.04374	0.174399	-0.968984
EXOG	0.371252	0.788944	-1.24236	-0.878945	0.961111
DIS3	1.04939	1.00282	-0.212829	-0.640252	-1.19913
USP7	1.12912	0.936904	-0.156714	-0.950819	-0.958486
STAT1	0.767183	0.920151	-1.59669	0.0295754	-0.120217
BDP1	-0.112117	0.207383	-1.55794	1.20437	0.258306
TAF13	-0.410367	-0.156099	-1.01157	-0.0881585	1.66619
MAP9	0.418206	1.09627	-1.47954	0.448177	-0.483104
CNTROB	0.202548	0.536852	-1.35057	1.21662	-0.605442
PLRG1	-0.0353472	1.35908	-0.249185	0.33227	-1.40682
SLAIN1	-0.588391	-0.0543604	-1.31583	1.006	0.952578
ENSMMUG00000004318	0.410867	1.46914	-0.473983	-0.223574	-1.18245
LIN7C	0.285778	1.43269	-1.11184	-0.775298	0.168664
NEK1	-0.369381	1.68897	-0.926082	-0.391544	-0.00196247
WASL	0.192189	0.224011	-0.97029	-0.909949	1.46404
TLK1	1.2804	0.225144	-1.23256	-0.750263	0.477278
CEP128	0.180329	1.41633	-0.953838	-0.971437	0.328613
FRYL	0.154517	0.044568	-1.22886	-0.468428	1.4982
SBDS	-0.406474	-0.14478	-1.03374	-0.0703737	1.65537
NRM	0.726736	0.295289	-1.63986	-0.193406	0.811241
ATP1B3	1.3707	0.724322	-0.692902	-0.959368	-0.442755
ENSMMUG00000051311	-0.396269	0.345724	-1.39388	0.115028	1.3294
ZNF518B	0.914516	1.25703	-0.68178	-0.67782	-0.811949
MYCBP2	-0.119032	0.714954	-1.19569	-0.665806	1.26558
RLF	0.244999	0.299149	-0.803924	-1.12917	1.38894
CBX4	-0.24851	0.473735	-0.662996	-1.04176	1.47953
IFT74	0.469415	-0.201591	-1.55841	1.13395	0.156633
ENSMMUG00000054106	1.50748	0.522472	-0.533478	-0.906715	-0.589755
TNKS2	0.492904	1.19683	-1.36001	0.293751	-0.623478
PSMD11	-0.661559	0.350327	-1.36496	0.545118	1.13108
TARS1	0.751027	1.14246	-0.678347	0.0751772	-1.29032
PAXBP1	0.628608	1.42608	-0.375287	-0.739363	-0.940033
DPYSL3	1.31854	0.600303	-0.907752	0.0263856	-1.03748
ARID4A	0.604154	0.300133	-1.5444	-0.370918	1.01103
BRWD1	0.107988	1.02316	-0.699096	-1.30217	0.870122
SESTD1	0.532128	0.189259	-1.75665	0.689854	0.345408
FAM107B	0.552684	1.16575	-0.799638	-1.25754	0.338739
SOX3	1.2519	0.753823	-0.218662	-0.561945	-1.22511
PIBF1	0.759558	0.292192	-0.915828	-1.18369	1.04777
SAP130	-0.353531	0.777677	-1.34728	1.17885	-0.255712
TTF1	-0.742222	1.34647	-1.2032	0.366853	0.232101
CLINT1	0.888419	1.21446	-1.08383	-0.364806	-0.654243
ZNF708	-0.486213	1.38113	-0.531324	0.686439	-1.05003
SRR	0.891323	0.536938	-1.63601	0.434884	-0.227136
CPLX2	0.402796	0.882422	-1.60777	0.620696	-0.298142
RAD51AP1	0.0987879	0.164722	-1.56111	0.0639159	1.23368
FOSB	-0.0343879	-0.241906	-0.637359	-0.791511	1.70516
FOS	-0.303285	-0.277937	-0.632202	-0.554084	1.76751
MT-ATP6	-0.385373	-0.135347	-0.293019	-0.900078	1.71382
SLC29A1	0.906534	0.681099	0.469352	-1.46347	-0.59351
STIP1	0.600798	0.775484	0.766146	-1.35022	-0.792209
MT-ND2	-0.61286	-0.552741	-0.952341	0.768208	1.34973
ZNF423	0.735968	0.655087	0.79645	-1.1276	-1.05991
SRSF10	1.14512	0.40073	0.535016	-1.23651	-0.844354
KNL1	0.710972	0.638664	0.390569	-1.7127	-0.0275094
KRIT1	0.980988	0.325262	0.653603	-1.52037	-0.439483
ZNF462	0.622843	0.519487	0.871518	-1.53364	-0.480205
PLXNA2	0.0621779	0.52351	1.30664	-0.611266	-1.28106
ADNP	0.578363	0.356964	1.15194	-0.915648	-1.17162
CLVS1	-0.240046	0.720021	1.33172	-0.837488	-0.974208
GNB1	0.475337	0.952415	0.727956	-0.995677	-1.16003
VCAN	0.426686	0.993046	0.692316	-0.808919	-1.30313
FEZ1	0.701263	0.248978	1.13115	-1.02248	-1.05891
DDX6	0.302201	0.903958	0.874889	-1.32401	-0.75704
LRRTM2	0.260983	0.401467	1.24776	-1.39633	-0.513878
GAP43	0.983094	0.803073	0.233905	-0.626927	-1.39314
PRKAR2B	0.899753	0.39677	0.742975	-0.571847	-1.46765
CREBBP	1.31324	0.458837	0.0566718	-1.35567	-0.473082
LDB1	0.383212	0.777009	0.974261	-0.96185	-1.17263
SOX5	0.71783	0.732833	0.739838	-1.11944	-1.07106
ETNK1	0.971418	0.727748	0.454824	-1.07297	-1.08102
SPAST	0.633448	0.646424	0.879301	-1.27541	-0.88376
RESF1	0.88801	0.603897	0.341412	-1.64111	-0.192209
CLASP1	0.340107	0.589792	0.994503	-1.55202	-0.372383
TRIM44	0.900295	0.391959	0.854846	-1.0788	-1.0683
MACF1	0.937861	0.407652	0.345455	-1.6837	-0.00726748
CCNG1	-0.337972	-0.217103	1.39666	-1.29653	0.454944
HSPD1	1.18759	0.482466	0.252508	-1.43297	-0.489592
WEE1	0.397767	0.54275	1.08188	-1.41845	-0.60394
ELOVL2	-0.18879	0.850455	1.20015	-0.747129	-1.11469
CDC25C	0.0495479	0.724437	1.0894	-1.45602	-0.40736
GFPT1	1.04407	0.666235	0.426258	-1.0376	-1.09897
UGCG	0.662534	0.105919	0.601252	-1.74558	0.375874
DLG3	0.650149	0.690574	0.772118	-0.687504	-1.42534
APEX1	0.643134	0.52246	0.979143	-0.906922	-1.23781
CCT2	-0.128247	0.557577	1.40841	-0.905161	-0.932584
ATN1	0.0556419	0.137199	1.55948	-0.949654	-0.802664
PGAP1	1.02219	0.44846	0.651062	-0.86173	-1.25998
PLEKHA5	0.664463	0.656364	0.860641	-1.02919	-1.15227
COPS2	0.742713	-0.0904412	0.389053	-1.69255	0.651228
PSMD14	-0.136392	0.387075	1.49991	-1.0327	-0.717891
CELF3	0.45972	0.833984	0.780126	-0.628172	-1.44566
TMEM30A	-0.342709	0.607792	1.38531	-1.16591	-0.484477
TEAD2	1.00888	0.37906	0.722023	-0.841454	-1.26851
CBFA2T3	0.499083	0.562052	1.06481	-1.20682	-0.919122
NCKAP5	1.17299	0.538028	0.380824	-1.01681	-1.07503
ZFP90	0.966926	0.181449	0.929405	-1.10872	-0.969056
CCDC50	0.493093	0.566948	0.97355	-1.47499	-0.558602
BCL10	0.362006	0.773888	0.486879	-1.73775	0.114978
R3HDM2	1.35078	0.141321	0.471245	-1.03636	-0.926985
CDC42EP4	1.07517	0.466217	0.505739	-0.652418	-1.39471
PCGF3	0.208212	-0.714752	0.464502	-1.24964	1.29167
CTBP2	0.301806	0.827762	0.989331	-1.06577	-1.05313
POGLUT2	-0.0946817	-0.108025	1.58513	-1.19676	-0.185664
AP3M2	0.598097	0.554246	0.973082	-0.808263	-1.31716
ZNF140	-0.414321	0.148317	0.399955	-1.41557	1.28162
SPIRE1	0.357891	0.680108	0.576671	-1.74894	0.134269
ACTB	-1.00436	0.0436945	1.65649	-0.388477	-0.307349
MRPL54	1.17334	-0.526963	0.956568	-1.07151	-0.531433
PARP6	0.527801	-0.198865	1.33453	-1.34034	-0.323129
FMNL2	0.889205	0.127734	1.03489	-1.11809	-0.933741
FAM126A	0.232972	0.342267	1.37235	-0.81775	-1.12984
H2AZ2	-0.769258	-0.831175	-0.524915	1.36541	0.759933
PSME4	0.730894	0.678755	0.707207	-0.694835	-1.42202
ENSMMUG00000009425	-0.480886	0.154244	1.6809	-0.712592	-0.641668
ST7	0.444933	-0.0253428	1.43842	-0.984818	-0.873194
LRP12	0.110694	0.736225	1.13696	-1.29622	-0.687658
SMG7	1.07575	0.2197	0.786457	-0.974617	-1.10729
GMPS	0.314001	-0.002158	1.49954	-0.82754	-0.983845
ZNF217	-0.024171	0.579667	1.30908	-0.607188	-1.25739
TRIB2	-0.78102	0.179228	1.02219	-1.26487	0.844465
MDM2	0.677591	1.06038	0.054663	-1.53142	-0.261208
FGF13	0.0266922	0.827301	1.08876	-0.623303	-1.31945
TMPO	0.634226	0.531469	0.990331	-1.00619	-1.14984
EHBP1	0.393838	0.20449	1.13583	-0.156696	-1.57747
UBASH3B	-0.23836	-0.183116	1.5519	-1.22184	0.0914138
CREB3	0.0312202	-0.0505535	1.57974	-1.15667	-0.403739
KPTN	-0.228552	-0.0969692	1.71851	-0.782738	-0.61025
CLIP1	0.395179	0.235191	1.33844	-1.15615	-0.812662
ATP2C1	-0.853397	0.108045	0.958799	-1.18328	0.969837
ANK2	0.930765	0.167811	0.976184	-1.04894	-1.02582
RFX7	0.156377	0.88482	0.990535	-1.28745	-0.744284
ENSMMUG00000019570	0.903233	0.574738	0.692866	-1.17901	-0.991824
SOS1	0.228005	0.471495	0.644384	-1.76909	0.425205
CACYBP	0.622678	0.317678	0.377999	-1.77709	0.458731
RBFOX3	-0.555378	0.307649	1.55821	-0.261408	-1.04907
TMEM178A	0.418821	0.602309	1.00926	-1.45222	-0.578173
CSNK2A3	-0.0203431	0.296337	1.43616	-1.29397	-0.418183
ZRANB1	0.0272815	0.448249	1.40165	-1.12807	-0.749115
CBY1	-0.941264	-0.174438	1.36136	-0.897463	0.651806
GPS2	-0.0641672	-0.577251	0.631308	-1.27245	1.28256
ZFP30	0.378171	0.185419	0.874675	-1.72493	0.286662
RAB8B	0.00479539	0.977623	1.01933	-1.02991	-0.971841
PDZD8	0.0906861	-0.0419385	0.720642	-1.6446	0.875208
VRK3	-0.224574	-0.0147397	0.332512	-1.43124	1.33804
NFYC	0.0287284	0.521187	1.365	-0.833186	-1.08172
ATXN7L3B	1.12921	0.731823	0.183412	-0.840837	-1.20361
CCT8	0.185615	0.422823	1.3539	-0.862113	-1.10022
CACNB1	0.83184	-0.778668	1.16914	-1.15328	-0.0690376
MTSS1	-0.228977	-0.152818	0.616381	-1.44334	1.20875
PPIL1	0.473887	-0.290864	1.40855	-1.26497	-0.326597
NSG1	0.114431	0.371377	1.39253	-1.20914	-0.669194
HDHD2	1.09325	-0.549403	1.06358	-1.00352	-0.603903
DCUN1D5	-0.565271	-0.36564	1.2062	-1.15105	0.87576
ENSMMUG00000011757	-0.249726	-0.104255	1.2036	-1.45369	0.604069
PANK4	0.625647	0.072355	1.28189	-0.983199	-0.996695
BICD1	0.745426	0.316865	1.05215	-1.0301	-1.08434
ERBIN	0.720122	0.915301	0.506004	-1.28837	-0.853053
KDM3A	0.226632	0.249868	0.86959	-1.72757	0.381478
GJC1	0.439606	0.562251	1.108	-0.918548	-1.19131
GDAP1	0.350852	0.565115	1.12331	-1.34859	-0.690686
AHCTF1	0.571175	0.318064	-0.0436711	-1.6903	0.844732
FOXJ3	0.185397	-0.158324	1.5338	-1.21047	-0.350396
SLC35A1	-1.01004	-0.0376014	1.38409	-0.877491	0.541043
ZNF281	0.917748	0.432957	0.70731	-1.4487	-0.609312
ACSL3	1.04813	0.880242	0.0027414	-1.3275	-0.603607
PRPF3	0.146972	0.732739	1.16299	-0.985203	-1.0575
PLCB1	0.581358	0.780979	0.817346	-1.02453	-1.15516
KIF5C	0.165452	0.826696	0.974929	-0.534086	-1.43299
CARS1	-0.166023	-0.671577	0.810813	-1.18319	1.20998
SMG8	0.73294	-0.0287013	1.06894	-1.49784	-0.275336
MEST	0.453324	-0.213294	1.04226	-1.60046	0.318173
BCL7A	0.870205	0.320501	0.79795	-0.48153	-1.50713
SMARCC2	0.268288	0.107399	1.31886	-1.4561	-0.238451
PTPRK	-0.0120801	0.215098	1.5339	-0.653659	-1.08326
PHF20L1	0.589269	0.574043	0.989732	-1.19024	-0.962803
MORC2	-0.220504	-0.68167	1.60654	-0.925624	0.22126
RNF138	0.545816	0.587855	0.7799	-1.63406	-0.279516
ENSMMUG00000007216	-0.389376	0.0276168	0.453039	-1.39438	1.3031
NEDD4L	0.622267	0.460624	1.00689	-1.36362	-0.72616
NUDT11	-0.262178	1.09471	1.01348	-0.89261	-0.953402
MAP4K5	0.326014	1.0369	0.607145	-1.48968	-0.480381
METTL22	0.733438	-0.0327776	1.23778	-0.810924	-1.12752
ZNF704	1.2008	-0.291638	0.905756	-0.960702	-0.854217
B3GNT5	1.35922	0.110316	0.298348	-1.37823	-0.389649
SPTBN1	1.25163	0.147528	0.613696	-1.07441	-0.93844
HDAC2	0.890451	0.691855	0.544606	-0.771942	-1.35497
MTF2	0.95563	0.748959	0.405771	-1.31438	-0.795982
ENSMMUG00000028689	0.424153	-0.317785	0.910884	-1.59766	0.58041
CXADR	0.756248	0.697705	0.712012	-1.2935	-0.872466
ENSMMUG00000013492	0.469955	-0.0664766	1.42474	-1.10601	-0.722204
ENSMMUG00000008718	0.555367	1.03533	0.531716	-1.26689	-0.85552
ZWINT	-0.868724	0.0179287	-0.843364	1.58824	0.105916
COX6C	-0.557933	-0.707339	-0.810832	1.47154	0.604561
SUPT20H	0.349148	0.41843	1.13644	-1.49922	-0.404804
IVNS1ABP	0.288203	0.900132	0.880539	-0.725218	-1.34366
PHACTR4	1.39057	0.165297	-0.0576616	-1.42488	-0.0733188
AFF4	0.514552	0.946385	0.638148	-1.38813	-0.710961
EZH2	0.613457	0.796882	0.75133	-0.871373	-1.2903
ENSMMUG00000003233	0.143025	-0.117132	1.11895	-1.58693	0.442083
ACVR2A	0.775112	1.0265	0.264407	-1.29889	-0.767128
BLM	0.510849	0.271139	1.23703	-0.789214	-1.2298
EEF1G	-0.238479	0.515803	1.46299	-0.764401	-0.975917
DYNLRB1	-1.14254	0.514046	1.43413	-0.559532	-0.246103
ENSMMUG00000051392	-0.977841	0.240805	-0.389235	1.61197	-0.485695
PANX1	0.428823	0.857394	0.863231	-0.961249	-1.1882
ATP2A2	0.264074	0.983823	0.650691	-1.55619	-0.3424
DNAJA1	1.36644	0.493347	-0.0653387	-1.26815	-0.526296
PHF21A	0.847346	0.744014	0.246597	-1.61848	-0.21948
NCOA6	1.07721	0.315066	0.594729	-1.44768	-0.539329
NOP58	0.647772	0.508176	-0.136856	-1.68941	0.670316
DLG1	0.562351	0.36336	1.1071	-1.37688	-0.655933
RARS1	0.0784902	1.21499	0.576856	-1.40197	-0.468359
CHTOP	0.792973	0.558946	0.805126	-0.87343	-1.28361
PCBP1	0.427301	0.374057	1.25144	-0.979524	-1.07328
ILF3	1.09854	0.0323437	0.878732	-0.985923	-1.02369
PFDN5	0.244391	-0.5672	1.47707	-1.19788	0.0436202
KIF11	-0.207488	1.0741	1.0102	-1.04214	-0.834679
ENSMMUG00000012140	0.30209	0.545276	0.942432	-0.14605	-1.64375
SLC35B4	0.969302	0.651691	0.512554	-0.846515	-1.28703
NSDHL	-0.186603	0.474248	1.4396	-1.16039	-0.566853
ENSMMUG00000060229	-0.143951	-0.181138	1.51014	-1.2867	0.101647
ZNF711	-0.099118	0.833168	1.19536	-0.910849	-1.01856
FBXO11	0.236055	-0.251737	1.5003	-1.25611	-0.228507
ADD2	1.36682	0.523399	0.0347294	-1.00678	-0.918168
CACNB3	0.365239	0.434941	1.11259	-0.404017	-1.50875
RALGAPA1	0.435506	0.259891	1.29392	-1.20664	-0.782672
IDH1	-0.111387	0.589603	1.28557	-0.41725	-1.34654
SQLE	0.754422	0.478875	0.904101	-0.845217	-1.29218
TCP1	0.33993	0.301548	1.34176	-1.10688	-0.876364
BZW2	1.2338	0.464528	0.362286	-1.09204	-0.968572
PPAT	0.831127	1.02198	0.225757	-1.2022	-0.876658
NIPSNAP1	0.963882	0.337418	0.829167	-1.0729	-1.05757
KIF1B	1.31023	0.224946	0.455758	-1.14225	-0.848684
TSPAN31	0.309405	0.240118	1.23416	-1.49711	-0.286564
STX16	0.0361128	0.217767	1.5326	-0.835507	-0.950971
WASF1	0.8187	0.744173	0.621613	-1.13433	-1.05015
BORA	0.0895739	0.85592	0.935007	-1.49568	-0.384823
UBE2Q1	0.726861	0.194591	1.09059	-1.33789	-0.67415
NUP85	-0.0576919	0.0764732	1.34223	-1.4752	0.114184
RYK	0.718957	0.259442	1.10697	-0.953116	-1.13225
L1CAM	0.560134	0.280844	1.10859	-0.485921	-1.46365
RAI14	0.741694	0.661069	0.7813	-1.18525	-0.998809
ZNF770	0.976005	0.854486	0.0565289	-1.46006	-0.426959
USP3	0.187665	0.416625	0.905038	-1.71202	0.202696
SCD	1.19276	0.534302	0.341322	-1.16879	-0.899597
ENSMMUG00000063635	0.60672	0.292614	1.17581	-1.11054	-0.964603
G3BP2	1.03321	0.444016	0.28207	-1.62403	-0.135265
SP3	0.780766	0.926255	0.440863	-1.19923	-0.948657
STRBP	0.573935	0.659954	0.740038	-1.59491	-0.379012
PIH1D1	-0.345549	0.447758	1.43732	-0.306542	-1.23299
MRPS30	-0.0293179	-0.21585	1.32044	-1.44065	0.365384
EMSY	0.494018	-0.0393866	1.36808	-1.24424	-0.578475
LMNB1	0.3288	1.32053	0.35508	-0.920997	-1.08341
TICRR	0.165777	0.594236	0.00628213	-1.67267	0.906379
NEDD1	0.940719	0.650563	0.157805	-1.62862	-0.120467
RASGEF1B	-0.805863	0.311726	1.43788	0.13665	-1.08039
SRRT	0.45584	-0.207499	0.795367	-1.65585	0.61214
TPX2	0.682467	0.83145	0.666231	-1.19624	-0.983912
HYAL2	0.507617	-0.265284	1.47659	-0.774956	-0.943967
CCDC117	0.680904	0.752451	0.72383	-1.32307	-0.834119
KIAA1841	0.0496555	1.11348	0.798924	-1.29294	-0.66912
KAT6A	1.39435	0.381581	0.133156	-1.14185	-0.767235
CNTRL	0.842555	1.00852	0.172206	-1.3251	-0.698175
ENSMMUG00000051635	0.832609	0.331719	0.962726	-1.00148	-1.12558
WDR47	-0.616455	-0.232477	1.72665	-0.754637	-0.123079
TIAL1	-0.236034	0.203239	1.53794	-1.20257	-0.302573
NOL11	0.938542	-0.091985	1.08602	-1.1449	-0.787683
SLC30A9	0.766324	0.177293	0.862647	-1.61231	-0.193957
ALDH18A1	0.650277	0.853062	0.681	-1.09225	-1.09209
FADS1	1.02741	-0.0229758	0.959272	-1.2005	-0.763214
ENSMMUG00000064760	0.0417062	0.351141	1.32832	-1.42153	-0.299635
CALR	-0.0471863	0.660841	-0.133532	-1.54925	1.06913
MCM7	0.00977468	0.451381	1.39271	-1.18972	-0.664142
MAPKAP1	0.692713	-0.590465	0.313668	-1.42997	1.01405
CYRIA	-0.165008	0.157657	1.61683	-0.665903	-0.943579
CASP3	-0.521671	0.744744	0.808999	-1.51257	0.480495
LDAH	0.479362	0.311714	1.20098	-0.644937	-1.34712
RAB11FIP2	-0.845415	0.569858	1.48048	-0.456178	-0.748744
KDELR1	1.11731	0.217046	0.647532	-1.39173	-0.590162
DDX18	0.77536	0.52659	0.808429	-0.707976	-1.4024
ENSMMUG00000001245	1.14905	0.802078	0.0501684	-0.875646	-1.12565
MBD6	0.973662	-0.400437	1.16994	-0.829344	-0.913819
ITSN1	0.751984	0.865326	0.552406	-1.2005	-0.969215
PBRM1	0.681221	0.686095	0.808441	-0.938419	-1.23734
ARRDC3	-0.725053	0.92952	0.550252	-1.38302	0.628303
HLTF	0.828911	0.919163	-0.0109396	-1.56107	-0.176069
ENAH	1.20848	0.620295	0.222965	-1.01386	-1.03788
ATF7IP	1.2759	0.475612	-0.1115	-1.44795	-0.192062
FXR1	-0.152877	1.12784	0.801148	-1.38075	-0.395357
RASA1	0.253992	0.286264	0.854001	-1.73449	0.340235
PHF12	-0.800132	0.150963	1.67315	-0.430495	-0.593489
OTX1	0.655788	0.236169	1.14723	-0.775778	-1.26341
EIF4G2	0.23106	0.978049	0.880565	-0.919799	-1.16987
SMCHD1	0.970403	0.874163	-0.315139	-1.4807	-0.0487283
ATAD2	0.466273	0.856634	0.0581327	-1.7132	0.332161
SRSF12	0.883166	0.716839	0.561452	-0.914918	-1.24654
PPME1	-0.592457	0.54777	1.50432	-0.831598	-0.62803
MRPL14	-0.0674133	-0.309624	1.72764	-0.712732	-0.637867
SETX	0.892357	0.0664641	0.449095	-1.70558	0.297661
B3GAT1	0.806099	0.719922	0.640417	-1.27694	-0.889494
ENSMMUG00000061128	-0.341217	0.426615	1.51585	-0.553856	-1.04739
ZNF292	0.321325	0.415207	1.28856	-1.09463	-0.93046
ZNF300	-0.00623909	0.986628	0.964965	-0.653955	-1.2914
CCDC14	0.302941	0.642275	1.04629	-0.538627	-1.45288
STOML2	-0.15155	-0.271288	1.21122	-1.42511	0.63673
PPP2R3A	0.113162	-0.13494	-0.0149579	-1.39019	1.42693
MAP4K4	0.55339	0.972726	0.31807	-1.6098	-0.234384
ANKLE2	1.12733	0.210941	-0.0308796	-1.61	0.302603
MSMO1	1.05422	0.232487	-0.0645667	-1.63175	0.409607
FOXN2	-1.23629	0.409145	1.31113	-0.725733	0.241744
CD200	-0.545343	0.297287	1.5329	-0.17391	-1.11094
SLC38A2	0.509772	0.909004	0.618058	-0.540137	-1.4967
CEP63	0.900875	0.838065	0.412366	-1.04428	-1.10702
C21orf91	1.2634	0.629227	0.0786447	-1.157	-0.814274
B4GALT3	-0.510103	-0.488619	0.801984	-1.09296	1.28969
NEO1	1.32394	-0.219436	0.691097	-1.13161	-0.663987
MAPK1	0.756192	0.196675	1.0527	-1.37032	-0.635242
DNAJC15	-0.575397	1.14724	0.856558	-1.26142	-0.166984
FYTTD1	1.08117	0.286108	0.420883	-1.59168	-0.196481
ZNF93	0.202287	0.859085	-0.329005	-1.55879	0.826424
ATXN10	0.317941	0.23132	1.30325	-0.461997	-1.39051
ENSMMUG00000014256	-0.876379	-0.207713	-0.318848	1.7269	-0.323965
RPL15	-0.559874	0.174048	1.67906	-0.626781	-0.666451
PGAP4	-0.746971	0.0580408	1.57787	-0.970718	0.0817734
PSMB7	-0.442521	0.294133	1.58283	-0.414319	-1.02012
SNRPN	-0.0133719	0.460541	1.34996	-1.31719	-0.479935
APPL2	0.0860933	0.984346	0.890853	-0.589048	-1.37224
CPLANE1	1.50794	-0.0136279	0.0763131	-1.2786	-0.292021
ZCCHC3	-0.0873494	-0.178554	0.623513	-1.50315	1.14554
WDR41	0.816875	0.486691	0.709191	-1.53897	-0.47379
CNOT2	0.347401	0.427261	1.15978	-0.476998	-1.45744
MORF4L2	0.27498	0.239304	1.33135	-0.480416	-1.36522
SF3B1	0.978473	0.052546	0.981997	-1.16366	-0.849354
ARGLU1	0.851432	-0.311235	1.12201	-1.34966	-0.312548
ATG5	-0.207693	-0.0362978	1.04791	-1.52764	0.72372
CCT4	0.833947	1.06123	0.176994	-1.04138	-1.03079
ANKRD13C	0.3392	0.0466932	-0.13521	-1.50973	1.25905
CLSTN3	0.660859	-0.660614	1.34707	-1.12345	-0.223861
ATL2	0.995464	0.700963	0.356566	-1.40277	-0.65022
GAS1	-0.750674	-0.713565	-0.635357	0.650122	1.44947
HIF1A	0.484787	0.300705	1.2155	-1.31284	-0.688155
DSTN	-0.0823296	0.733802	1.26578	-0.873169	-1.04409
PRPF31	1.13531	-0.411943	0.494315	-1.49079	0.273106
TRA2B	-0.400566	-0.640283	1.34575	-1.03903	0.734131
ZNF146	1.28738	0.653952	-0.0426165	-1.18455	-0.714161
ROCK2	0.460037	0.779139	0.859992	-1.39489	-0.70428
EMC4	-0.430374	-0.0163111	0.614088	-1.39202	1.22462
TMEM129	0.234615	-0.143436	1.54447	-1.13509	-0.500554
KIAA0586	0.84237	0.43766	0.837618	-0.780394	-1.33725
ZNF43	-0.00960293	0.973506	0.298853	-1.67196	0.4092
PRRT2	0.696606	0.0663713	1.146	-0.521529	-1.38745
DEPDC1	0.263947	1.17918	0.218004	-1.57644	-0.0846924
INSIG1	0.0138314	1.03577	0.875629	-0.570821	-1.35441
SRP9	0.32689	0.165245	1.29337	-0.345489	-1.44002
CS	0.913154	0.232879	0.860902	-0.581049	-1.42588
ZNRF1	0.435692	-0.382536	1.51745	-1.03805	-0.532559
ERLIN2	-0.0773768	0.536106	1.20978	-1.48659	-0.181919
KIAA1109	-0.014291	0.779432	1.10155	-1.40057	-0.466116
NASP	1.19499	0.724309	0.0405254	-1.2302	-0.729626
ATP5F1C	-0.246547	-0.512803	1.76505	-0.668889	-0.336809
TNFRSF19	1.15946	-0.397463	0.975965	-0.736867	-1.0011
KDM5B	0.631298	0.81711	0.644895	-0.642335	-1.45097
TLNRD1	0.363379	0.724008	1.03814	-1.12234	-1.00319
DDHD1	1.04345	0.672031	0.165686	-1.51623	-0.364937
CCN1	0.794632	0.400279	0.533663	-1.70973	-0.0188411
GNL3	0.0411711	1.31546	0.595376	-0.91192	-1.04009
ENSMMUG00000056354	-1.09662	0.291583	1.29534	-0.92128	0.43097
SMARCA4	1.29799	0.421585	0.283413	-0.841527	-1.16146
THRAP3	1.13005	0.761978	0.0201513	-1.35216	-0.560018
RTRAF	-0.0623929	0.797355	1.21101	-0.986468	-0.959509
RTKN2	0.535845	0.820756	-0.0145664	-1.70506	0.363025
HSPA4	1.19109	0.608949	-0.280363	-1.45883	-0.060852
PTN	-0.878745	-0.710148	-0.582069	0.966833	1.20413
DNM1L	0.480767	0.567732	1.04027	-0.741962	-1.3468
HMGCR	1.08601	0.684949	0.276284	-1.32318	-0.724063
IGFBP5	-0.549487	-0.624029	-0.708872	0.222007	1.66038
AGPS	0.274367	0.66229	1.13221	-0.855401	-1.21346
TMEM41B	0.502533	0.648675	0.656684	-1.69805	-0.109839
SPAG9	0.584259	-0.185738	1.12719	-1.53412	0.00841015
TOMM22	-0.80361	0.295705	1.62478	-0.518646	-0.598225
PGRMC2	0.782466	0.371405	0.977017	-0.953868	-1.17702
URGCP	0.108091	-0.0342051	1.56036	-0.487689	-1.14655
SMARCA1	-0.0593508	0.284798	0.271831	-1.61206	1.11478
WDR48	1.14732	0.610496	-0.398289	-1.4634	0.103874
ORC2	0.280297	0.92936	0.492099	-1.67779	-0.0239639
ANAPC5	1.20909	-0.365878	0.477654	-1.46781	0.146945
MSANTD4	0.417366	0.394193	0.505354	-1.78715	0.470238
KPNA3	1.03651	0.111059	0.696552	-1.52528	-0.318844
DCTN4	0.0195361	0.790237	0.278945	-1.70726	0.618542
ENSMMUG00000003646	0.472938	-0.903836	1.32548	-1.08068	0.186095
ZC3H8	0.952104	0.235625	0.787622	-1.4707	-0.50465
HMGCS1	1.22224	-0.0487377	0.16115	-1.55815	0.223493
HOOK3	1.36728	0.286143	-0.0705114	-1.4203	-0.162604
GALNT8	0.143514	-0.086592	1.37076	-1.44657	0.0188975
TP53BP1	1.39745	0.559343	-0.117742	-1.04068	-0.79837
SRP68	1.05563	-0.0716448	0.906526	-1.31385	-0.57666
MTA2	0.715666	0.854969	0.583832	-0.859142	-1.29533
UBB	-0.644785	0.236313	1.50204	0.0338696	-1.12744
TRA2A	0.75477	1.02723	0.322015	-1.22228	-0.881737
UBQLN1	0.320551	0.7569	1.02332	-0.862553	-1.23821
ATP6AP1	-0.552319	-0.0868806	1.38406	-1.23683	0.491965
ZFAND5	-0.250889	-0.624083	1.64709	-0.904032	0.131916
TMEM70	0.420439	-0.135148	1.48752	-0.78442	-0.988395
DCP2	0.953134	0.545345	-0.170156	-1.63446	0.306138
FBXO21	0.00385069	0.317447	0.206902	-1.62735	1.09915
PJA1	-0.0770756	1.32008	0.661525	-0.962976	-0.941551
TRIM24	0.854885	0.97734	-0.00214678	-1.48045	-0.349626
WSB1	-0.830294	-0.545262	-0.783158	0.892354	1.26636
CHCHD2	-0.258708	0.0101472	-0.967492	1.67046	-0.454408
DCAF8	1.10327	0.0073423	0.885093	-1.06075	-0.934956
ACE	1.11787	0.593365	0.39799	-1.14253	-0.966704
XPO7	-0.14899	0.368864	1.42362	-0.339817	-1.30368
SKA1	0.861504	0.726093	0.593285	-1.10614	-1.07474
TCF3	0.906631	0.0610337	0.903065	-0.38357	-1.48716
TRIM9	-0.535137	-0.787547	-0.730452	0.551093	1.50204
NARS1	1.24398	0.236967	0.355755	-1.45828	-0.37842
PCM1	0.927773	0.925791	0.0527546	-1.43396	-0.472359
ABI2	-0.344768	-0.535185	0.478441	-1.08088	1.4824
CHD6	0.531067	0.388185	0.708536	-1.74674	0.118955
TCEA1	0.0826273	0.517238	0.673058	-1.74607	0.473148
ANP32A	-0.559609	0.82518	1.23467	-0.328126	-1.17211
PDS5B	1.30401	0.338524	0.0912033	-1.44727	-0.286465
CRNKL1	-0.0686712	0.0309032	0.589171	-1.59767	1.04626
NAP1L4	0.824704	-0.408417	0.926614	-1.50594	0.163042
ZDHHC3	-0.0935881	0.0978283	1.42722	-1.39403	-0.037434
TOP2B	0.850796	1.03934	0.181547	-1.12808	-0.943608
ARF5	0.66974	0.482497	0.953788	-0.743767	-1.36226
LOX	-0.998422	-0.449166	-0.541216	1.50958	0.479224
NCSTN	0.760372	0.855579	0.446944	-0.605836	-1.45706
CD9	-0.879402	-0.739158	-0.503887	0.766261	1.35619
USP14	1.33581	0.514079	0.116393	-1.03128	-0.93501
RUFY1	0.918207	0.430995	0.783549	-1.26994	-0.86281
G2E3	-0.374585	1.06799	1.05315	-1.0791	-0.667459
UBE2D1	0.615625	-0.197997	0.683474	-1.67047	0.569372
CKS2	-1.23407	-0.42894	-0.107654	1.48278	0.287886
ENSMMUG00000005593	0.373017	-0.489112	-1.34536	0.120933	1.34052
MACROH2A1	0.807264	0.132717	1.09329	-0.83182	-1.20145
SZRD1	0.517771	-0.0659286	1.36096	-0.565643	-1.24716
FNBP1L	0.83403	1.08679	0.109843	-1.17255	-0.858113
TOMM7	-0.642335	-0.416184	-0.538004	1.76011	-0.163586
PNMA8A	0.256493	0.220273	1.36098	-0.503668	-1.33407
HNRNPF	-0.146138	-0.382941	1.61304	-1.10882	0.0248613
LITAF	-0.766535	-0.754063	-0.529043	0.543461	1.50618
GNAI2	0.310475	-0.751093	0.262478	-1.18661	1.36475
AGO1	1.31841	0.374728	0.216188	-0.599776	-1.30955
SMS	-0.339087	0.324223	1.37998	0.00437567	-1.3695
HNRNPUL1	-0.693934	0.168137	-1.30314	0.670009	1.15893
IPO8	0.0965435	0.391451	1.41941	-0.911247	-0.996161
RPL38	-0.805868	-0.356372	-0.352584	1.74532	-0.230494
WNK1	0.679745	0.472509	0.997389	-1.0062	-1.14344
TOPORS	-0.0736045	-0.318418	-1.46869	0.880182	0.980526
FAM107A	-1.38251	0.184636	1.41933	-0.198883	-0.0225725
ENSMMUG00000059725	-0.554076	-0.865768	-0.754303	1.01285	1.16129
LMO4	-0.63529	-0.505848	-0.938044	0.652875	1.42631
MNS1	-0.784204	-0.283845	-0.992391	1.344	0.716444
CSDE1	0.615678	1.28736	0.0574814	-1.11907	-0.841449
ATAD5	1.00927	0.526913	-0.414237	-1.53636	0.414419
SETD1B	0.501879	0.174792	1.1477	-0.30547	-1.5189
KIF20A	0.447918	0.693573	0.930648	-1.4268	-0.645339
OIP5	0.779928	-0.123733	-1.26535	1.19614	-0.586981
ACVR1	-0.884746	-0.757193	-0.424244	1.43889	0.627295
CLCN3	-1.12791	0.563979	1.41244	-0.589764	-0.258737
RBM17	-0.171859	-0.252035	-1.30209	1.46382	0.262168
SLC35F1	-0.222541	-0.972928	-0.892198	1.16361	0.924059
MRPL33	-0.566282	-0.365848	-0.798009	1.7053	0.0248393
COX8A	-0.823673	-0.283428	-0.902623	0.553747	1.45598
ZFYVE16	0.124931	0.408405	0.387435	-1.73388	0.81311
ATP5IF1	-0.680242	-0.348888	-0.685273	1.71638	-0.00197114
PRKAR1A	-0.413213	-0.050775	-1.13575	1.5927	0.00703036
TCERG1	1.16296	0.631269	0.256186	-0.823573	-1.22684
DAZAP2	-0.616517	-0.0627878	-1.28884	0.889087	1.07906
RPS23	-0.0263797	-0.74647	0.058011	1.61901	-0.904172
CALD1	-0.190274	-0.594876	-1.12073	1.47144	0.434438
YY1	-0.480646	-0.0140927	-1.3702	1.20846	0.656482
RANGAP1	-0.704101	-0.997966	-0.0555282	1.57185	0.185742
FSTL1	-0.189798	-0.850517	-0.345295	1.73237	-0.346764
FKBP2	-0.461038	-0.571734	-1.02282	0.639408	1.41618
EIF2S2	0.977026	-0.379673	-1.22887	1.08769	-0.456169
KLHDC8A	-0.602058	-0.700616	-0.61509	1.64058	0.277186
MLC1	-0.982538	-0.599218	-0.56221	0.897087	1.24688
ENSMMUG00000001645	-0.492569	-0.372164	-0.475355	1.78696	-0.446869
KTN1	0.231157	-0.347155	-1.54176	0.635328	1.02243
RRM1	-0.242529	-0.535613	-0.181079	1.73688	-0.77766
OAT	-0.9568	-0.26607	-0.874447	0.891003	1.20632
GRN	-0.494853	-0.670458	-0.916442	1.42746	0.654292
GABARAP	-1.00908	-0.599809	0.191698	1.5977	-0.180507
CDC42	-0.697732	0.449396	-1.12704	1.42768	-0.0523045
TRAPPC1	-0.0596789	-0.353944	-0.614705	1.73166	-0.703327
TFAP2C	-1.12368	-0.287282	0.0843234	1.60346	-0.276821
COX4I1	-0.746719	-1.00624	-0.324359	1.32768	0.749641
HBP1	-0.278662	-0.341777	-0.880606	1.7261	-0.225054
TCEAL9	-0.990899	0.158382	-0.914679	1.43487	0.312328
TMED2	-0.750082	-0.367514	-0.91229	1.46761	0.562274
EPN1	0.306601	-0.994508	-0.683631	1.5544	-0.182863
AP2B1	-0.307359	-0.860849	-0.909846	1.33693	0.741119
SSR3	-0.728324	-0.808387	-0.647563	1.16694	1.01733
MYL6	-0.804038	-0.805423	-0.229807	1.61265	0.226614
HMBOX1	0.237423	-0.71486	-1.3322	1.00595	0.803689
AASS	0.36552	0.336058	-1.09606	1.30951	-0.915035
NOTCH2	-0.741286	-0.397741	-0.686471	1.67263	0.15287
NDUFAF3	-0.610053	-0.659035	-0.632468	1.65275	0.248804
PPIG	-0.120794	0.0548382	-1.49737	1.29073	0.272594
FAM127C	0.648007	-0.0425515	-0.327752	1.17117	-1.44887
MTDH	-0.631614	0.609958	-1.1355	1.37549	-0.218341
MTPN	-0.286941	-0.0902257	-0.89948	1.70733	-0.430683
DAD1	-0.805833	-0.785925	-0.591265	1.07468	1.10834
PSKH1	-0.832977	-0.311801	-0.344527	1.73995	-0.250641
CHIC2	-0.71951	-0.0885571	-1.2006	1.09281	0.915858
ENSMMUG00000055794	-0.818951	-0.282195	-0.46179	1.73411	-0.171172
METTL4	-0.506856	-0.142343	-0.0544979	1.66947	-0.965776
FAAH	-1.21333	-0.52259	-0.128922	1.43207	0.432771
ENSMMUG00000006463	-0.628162	-0.666819	-0.794366	0.628104	1.46124
ENSMMUG00000030408	-0.0652009	0.0664335	-0.452109	1.58288	-1.132
HNRNPA1	-0.499509	0.563974	-0.324607	1.41327	-1.15313
RAP2A	-1.0444	-0.451498	-0.640844	0.991303	1.14544
ENSMMUG00000055457	-0.586267	-1.04798	-0.42362	1.3903	0.667567
ARAF	-0.406785	0.325008	-0.87506	1.59766	-0.640822
DCTN3	-1.034	-0.750865	-0.305713	1.25542	0.835159
DHRS7	-1.06059	-0.549492	-0.494812	0.814649	1.29024
HINT1	0.405065	-0.45968	-0.521922	1.55041	-0.973876
P4HA1	-0.516091	-0.413205	-1.02693	0.432708	1.52351
ARL2BP	0.218405	0.00164003	-0.585084	1.51356	-1.14852
CDC25B	-0.392023	0.287775	-0.0940891	1.46573	-1.26739
ENSMMUG00000008097	0.663031	-0.410304	-0.798248	1.41426	-0.86874
FBXL3	-1.02447	-0.0771838	-0.932585	1.07062	0.963616
NFKBIZ	-0.273326	-0.203576	-1.26655	0.255338	1.48812
SUN2	-1.17275	-0.460013	-0.448212	1.19369	0.887286
HADHB	-1.15847	-0.209041	-0.661922	0.773063	1.25637
FAM127A	0.13578	-1.06047	-0.999244	0.89988	1.02406
CDCA7L	-0.788581	-0.369331	-0.523752	1.72214	-0.04048
RAB31	-0.749398	-0.47804	-0.659152	0.237678	1.64891
NDRG2	-0.961084	-0.68264	-0.323259	0.449023	1.51796
EEF1B2	-0.753686	0.430163	-1.11044	1.41902	0.0149384
ENSMMUG00000052035	0.00937742	-0.0599753	-1.60671	0.972661	0.684644
ABHD2	-0.866602	-0.494311	-0.565638	0.319493	1.60706
COX5A	1.1334	-0.507189	-1.17461	0.955405	-0.40701
JAM2	-0.430683	-0.656533	-0.985049	0.671432	1.40083
ENSMMUG00000059988	0.00760626	-1.01749	-0.940483	1.27368	0.676683
ERP29	-0.0292651	-0.155598	-0.949715	1.66941	-0.534831
RNF103	-0.255888	-0.117839	-1.41421	0.492556	1.29539
MRPS17	0.283527	0.507834	-1.24329	1.22941	-0.777482
ARL1	-0.216241	-0.423831	-0.974064	1.67945	-0.065311
ICAM3	-0.682959	-0.592363	-0.894543	1.20391	0.96596
CDK2AP2	-1.02042	-0.752094	-0.354898	1.01778	1.10963
RETREG3	-0.669031	-0.0764142	-1.22504	0.756714	1.21377
RBPJ	-0.166371	-0.631727	-0.561733	1.75999	-0.40016
LAMP2	0.401034	-0.800588	-1.28934	1.07859	0.610306
ISCU	-0.412648	-0.42863	-1.09571	0.434898	1.50209
RNF5	-0.396242	0.715907	-0.260471	1.24729	-1.30648
ENSMMUG00000002200	-0.832913	-0.556376	-0.629965	0.479932	1.53932
ZBTB20	-1.09652	-0.397641	-0.622596	1.13441	0.982352
CDCA8	0.895027	0.357201	-1.57409	0.681406	-0.359549
ITM2C	-0.217682	-0.557791	-0.915754	0.017135	1.67409
[truncated: 609 more rows]

## Sheet: mouse vRG
	E10	E12	E15	E16	E17
LHX5	1.78872	-0.455371	-0.450582	-0.456304	-0.426466
CDKN1C	1.78824	-0.403395	-0.456945	-0.454905	-0.472997
ELAVL4	1.77277	-0.540707	-0.55077	-0.462061	-0.219235
UBB	1.73774	-0.768789	-0.325891	-0.516793	-0.126268
Hmgb3	1.76141	-0.596875	-0.452475	-0.559665	-0.152393
PKM	1.77852	-0.337329	-0.445145	-0.618186	-0.377858
Malat1	1.75621	-0.759936	-0.300028	-0.402145	-0.294098
H3-5	1.72462	-0.782393	-0.392187	-0.507897	-0.0421435
Hnrnpa1	1.77632	-0.440457	-0.494809	-0.582008	-0.259048
Hmgn2	1.69934	-0.891147	-0.133721	-0.527974	-0.146498
HSPA8	1.78149	-0.433113	-0.427229	-0.586922	-0.334225
HNRNPK	1.77226	-0.62407	-0.412382	-0.488071	-0.247733
RPS29	1.62895	-1.02476	-0.388999	-0.354492	0.139294
RPS28	1.65569	-0.982189	-0.532317	-0.088747	-0.0524384
YBX1	1.77356	-0.428482	-0.288435	-0.406947	-0.649693
ACTG1	1.76598	-0.421936	-0.51353	-0.632873	-0.197637
HDGF	-1.55561	0.792148	0.946211	-0.233777	0.0510295
MRFAP1L1	-1.7736	0.323593	0.494273	0.321949	0.633782
H2afv	1.62687	-1.05124	-0.147773	-0.473566	0.0457171
RPS19	1.73943	-0.66007	-0.317112	-0.652818	-0.109426
MT-ATP6	1.7212	-0.844326	-0.196442	-0.50529	-0.175143
TUBA1B	1.74015	-0.600195	-0.518589	-0.584237	-0.0371293
TUBA1A	1.73684	-0.694447	-0.454428	-0.540748	-0.0472131
SNRPD3	-1.76706	0.31038	0.55171	0.269026	0.635939
Ptms	-1.58293	0.668667	0.663459	0.661864	-0.411058
Gm3764	-1.75927	0.616864	0.490196	0.137064	0.515145
HMGN1	1.70711	-0.75675	-0.473211	-0.534662	0.0575112
MTCH1	-1.10589	1.12105	0.937699	-0.170634	-0.782218
MEIS2	-1.73422	0.0650298	0.388395	0.733118	0.547675
Cdk2ap1	-1.19524	0.523405	1.39598	-0.154118	-0.570034
NFIB	-1.68635	-0.0828984	0.421641	0.852066	0.49554
NOP10	-1.73519	0.183453	0.836453	0.359255	0.356025
PBX1	-1.73697	0.433539	0.066555	0.505283	0.731595
BASP1	-1.72088	0.781095	0.546453	0.0346838	0.358654
POLR1D	-1.69056	0.756448	0.194772	0.010113	0.729223
OSTC	-1.75762	0.350867	0.753789	0.382464	0.270504
CDV3	-1.33985	1.11641	0.350309	0.57987	-0.706737
DPYSL2	-1.64988	0.318639	0.246492	1.05582	0.0289262
PGLS	-1.74041	0.568386	0.46394	0.0523983	0.655686
STUB1	-1.72628	0.233588	0.4459	0.19273	0.854062
PRDX6	-1.75787	0.632146	0.612927	0.216836	0.29596
HNRNPD	-1.64253	1.0454	0.179127	-0.00288547	0.420889
RAC1	-1.4335	0.88977	0.821437	0.330222	-0.607927
RWDD1	-1.78014	0.375723	0.504686	0.326444	0.573287
FOXG1	-1.75778	0.35485	0.603536	0.175529	0.623869
UCHL1	-1.42446	1.1921	-0.342807	-0.0777024	0.652874
TRMT112	-1.76409	0.303719	0.506991	0.271493	0.681892
AP3S1	-1.73525	0.209729	0.805955	0.494836	0.224728
MAGOH	-1.70749	0.70967	0.734087	0.191859	0.0718709
SOX2	-1.334	0.697204	1.23938	-0.209842	-0.392741
NFIA	-1.69069	0.0144667	0.571217	0.872296	0.232714
SF3B5	-1.73421	0.342627	0.624813	0.0745314	0.692235
ID4	-0.775793	1.31254	0.844754	-0.629421	-0.752075
HJURP	-1.6374	0.547839	0.187946	0.987931	-0.0863125
NDUFA11	-1.67701	-0.123928	0.603332	0.385332	0.812274
Ptma	1.65589	-0.713797	-0.357349	-0.766637	0.18189
DCUN1D5	-1.75048	0.292228	0.641247	0.63814	0.178867
ATF4	-1.71638	0.904316	0.292662	0.171035	0.348364
NHLH2	1.78744	-0.378501	-0.462066	-0.473437	-0.473437
TAF10	-1.12546	0.924775	1.04033	0.0509949	-0.890641
FABP7	-1.50388	-0.500656	0.871288	0.77451	0.358735
MANF	-1.77716	0.457323	0.537695	0.528105	0.254041
NRAS	-1.71983	0.565831	0.307383	0.790149	0.0564692
Bex1	-1.5004	1.22626	0.467609	-0.0347042	-0.158766
2410015M20Rik	-1.76414	0.175864	0.62958	0.45739	0.501306
Hist3h2ba	-1.71334	0.320616	0.437636	0.0812944	0.873798
H1fx	-1.15738	0.84199	1.22175	-0.29811	-0.60826
Zfos1	-1.57639	1.04634	0.63371	0.0294429	-0.133104
TRAPPC4	-1.76668	0.447827	0.614343	0.189904	0.514604
WDR89	-1.43247	0.122763	-0.260524	1.34738	0.222853
TUBB3	1.76839	-0.353379	-0.594272	-0.58057	-0.240173
AUTS2	-1.72938	0.727869	0.0288924	0.539258	0.433364
RRM2	1.7552	-0.487852	-0.562602	-0.593625	-0.111124
BCL11A	-1.72147	0.887506	0.178623	0.294231	0.361109
CIRBP	-1.56911	-0.0728003	0.343014	0.114961	1.18394
EIF4B	-1.40606	1.34806	0.120106	0.276657	-0.338766
CALM2	1.72621	-0.782817	-0.406302	-0.490004	-0.0470858
RBM3	-1.73053	0.293692	0.277845	0.287789	0.871203
PBRM1	-1.72535	0.134673	0.20858	0.747834	0.634259
HINT1	-1.72106	0.168559	0.578288	0.170413	0.803798
SRSF2	-1.09659	1.0041	0.860163	0.230463	-0.998138
CALM1	1.78269	-0.50694	-0.307322	-0.512846	-0.455585
HNRNPM	1.78026	-0.559208	-0.505893	-0.301481	-0.413681
NIPBL	-1.71008	0.918811	0.151548	0.363623	0.276097
PFN1	-1.75559	0.220648	0.626575	0.275215	0.633152
SERBP1	1.78539	-0.431802	-0.519575	-0.480914	-0.353103
CCNB1	1.74817	-0.778919	-0.379	-0.393471	-0.196781
CD24	-1.59438	0.140539	0.229063	0.0486055	1.17617
YWHAE	1.69657	-0.809374	-0.463487	-0.496436	0.0727252
FTL	1.69455	-0.771535	-0.193034	-0.703761	-0.0262218
CDK4	1.74117	-0.478869	-0.511087	-0.688368	-0.0628465
RANBP1	1.77345	-0.521698	-0.353882	-0.61382	-0.284054
NUCKS1	-1.74471	0.492299	0.632376	0.556492	0.0635454
LIX1	-0.836537	1.72606	-0.175184	-0.224677	-0.489659
ERH	1.71529	-0.852786	-0.320288	-0.472313	-0.0698998
HP1BP3	-1.64424	0.055929	0.0299421	0.581471	0.9769
EIF4A1	1.70037	-0.611266	-0.355915	-0.778681	0.0454907
EMC10	-1.71296	0.340765	0.310518	0.150272	0.911402
SRRM2	-1.73387	0.4853	0.0196407	0.577875	0.65105
HNRNPUL1	-1.54235	0.641716	0.0336931	1.07862	-0.211673
UBE2S	1.68796	-0.515681	-0.0502793	-0.205402	-0.916597
CUX1	-1.76364	0.586305	0.157933	0.484297	0.535104
PLEKHJ1	-1.71824	0.403342	0.832767	0.0471019	0.435028
STMN1	1.14849	-1.36233	-0.327069	-0.264217	0.80513
PCBP1	-1.42635	1.11165	0.763147	-0.377198	-0.071249
HSP90AB1	1.73209	-0.199409	-0.633925	-0.727203	-0.171549
HBE1	-0.44899	1.78885	-0.441877	-0.44899	-0.44899
TRAPPC1	-1.70328	0.598503	0.578194	-0.102559	0.629138
DDX46	-1.6173	0.887178	-0.0855675	0.0491975	0.766493
EPHA4	-1.73064	0.265578	0.10966	0.634242	0.721158
POLR2I	-1.75243	0.217048	0.651838	0.259173	0.624366
PUM2	-1.63885	0.894668	0.247221	0.654142	-0.157176
RPL3	1.72958	-0.612148	-0.357313	-0.709645	-0.0504758
CSNK2A3	-1.51214	0.626865	-0.340698	1.08885	0.137115
BOLA2	-1.7097	0.00267596	0.563441	0.342028	0.801551
EIF1B	-1.68984	-0.0479891	0.706047	0.279949	0.751836
RPS23	1.68487	-0.480193	-0.362148	-0.892728	0.0502017
ECI2	-1.74175	0.411438	0.65241	0.605027	0.0728795
NPM3	-1.74022	0.271909	0.581259	0.155094	0.731962
CTNNBIP1	-1.57356	0.522084	0.868791	0.581161	-0.398472
ARGLU1	-1.52891	0.695319	0.553023	0.785949	-0.505379
POLE3	-1.78057	0.542864	0.376867	0.324775	0.536064
SOX9	-1.75804	0.493165	0.4063	0.686592	0.171987
SSR2	-1.76677	0.246443	0.423046	0.412969	0.684311
Gm9843	-1.74916	0.416006	0.614219	0.616058	0.102878
NDUFC2-KCTD14	-1.67099	-0.14792	0.634128	0.389982	0.7948
NDUFB9	-1.78103	0.366316	0.59856	0.442707	0.373452
GNB1	-1.5657	0.294803	0.902153	0.722799	-0.354056
CDC25C	-1.75861	0.186197	0.453484	0.416358	0.702573
SUPT16H	-1.5324	0.956941	0.0706682	0.80176	-0.296965
2022-09-15	-1.72479	0.100017	0.37566	0.40796	0.841154
ATP5F1C	-1.73916	0.416969	0.752748	0.0940515	0.475388
YTHDC1	-1.71126	0.582283	0.407925	0.751789	-0.0307374
LLPH	-1.74229	0.596278	0.660125	0.408908	0.0769743
LAMTOR2	-1.76506	0.197378	0.641	0.515138	0.411541
SPTSSA	-1.66086	-0.194155	0.559287	0.487234	0.808491
PDCD5	-1.69281	0.262529	0.931485	0.440963	0.0578371
PTN	-1.59831	-0.265868	0.851231	0.768281	0.244668
RPL7L1	-1.7641	0.535151	0.561638	0.155532	0.511783
PFDN2	-1.72185	0.437548	0.220657	0.193125	0.870519
EIF4A3	-1.72483	0.863166	0.331525	0.143634	0.386501
NDUFB5	-1.7125	0.485646	0.560866	-0.0511645	0.717152
SF3B6	-1.77458	0.490636	0.629002	0.330487	0.324457
GSTM3	-1.70538	0.212607	0.939183	0.202073	0.351521
AKIRIN2	-0.652237	1.01778	1.15406	-0.598121	-0.921477
GTF2I	-1.68149	0.688424	-0.121252	0.379509	0.734807
ILF3	-1.57219	0.923542	0.0157142	0.803677	-0.170746
ACO2	-1.75561	0.73178	0.33288	0.217404	0.473548
TUBA1C	-1.75172	0.172105	0.387632	0.739465	0.452522
EMG1	-1.77456	0.404083	0.541493	0.255087	0.573899
LSM2	-1.68849	0.224611	0.450094	0.0698119	0.943974
GPC1	-0.683452	1.75916	-0.246825	-0.284392	-0.544487
PLPP3	-1.65332	0.522511	0.207513	0.973617	-0.0503241
PSMG4	-1.69678	0.722747	0.632873	0.435004	-0.0938414
CLIC1	-1.72898	0.00597239	0.503643	0.527551	0.691818
PTPRS	-1.74865	0.555748	0.0733477	0.585146	0.534408
TNPO3	-1.65981	0.972275	0.495816	0.229112	-0.0373971
HMG20B	-1.73363	0.755751	0.0747381	0.381102	0.522043
NDUFB7	-1.68167	-0.140679	0.777193	0.554226	0.490926
DPH3	-1.7252	0.533266	0.811477	0.125187	0.255266
TMSB4Y	1.56787	-0.674735	-0.669937	-0.665125	0.441923
TIMM13	-1.7492	0.220042	0.527176	0.264377	0.737607
Alyref	-0.738419	0.354915	1.60492	-0.670145	-0.551273
MRPL54	-1.74724	0.562053	0.686264	0.115594	0.383327
RSRC2	-1.7761	0.570274	0.248011	0.484476	0.473334
RPRM	-1.34079	1.46604	0.132557	-0.162132	-0.09567
Pantr1	-1.49685	-0.561972	0.824676	0.585477	0.648665
Rpl6l	-1.64438	0.241813	1.05516	0.352384	-0.00497606
TCF25	-1.74089	0.549815	0.151119	0.292595	0.747363
MRPL11	-1.7687	0.588753	0.542501	0.20126	0.436186
MT-ND5	-1.64198	0.984174	0.515644	0.243302	-0.101143
COX7B	-1.7414	0.233125	0.306666	0.380373	0.821241
SUCLG1	-1.78338	0.573168	0.438033	0.408777	0.363402
MED21	-1.78267	0.468878	0.55628	0.432924	0.324592
OTUB1	-1.5403	0.982476	0.260914	0.672893	-0.375987
RHOA	-1.70167	0.316902	0.248063	0.95326	0.183445
MED25	-1.74653	0.740098	0.356892	0.503052	0.146486
Rpl41	1.54367	-1.1333	-0.0893272	-0.530111	0.209063
NDUFB3	-1.73808	0.0788567	0.638215	0.361672	0.659338
H2afj	-1.65721	0.0287583	0.415422	0.191457	1.02157
HRAS	-1.107	1.06739	0.919019	0.0097184	-0.889128
NR2E1	-1.63598	0.652595	0.75952	0.496493	-0.272632
PTP4A1	-1.52571	0.365682	0.570291	1.01576	-0.42602
Glrx2	-1.67745	0.00883399	0.827092	0.692703	0.148826
ACVR2B	-0.73106	1.75135	-0.163263	-0.475625	-0.381398
NDUFB8	-1.67539	-0.0203971	0.78415	0.171035	0.740606
PSMB4	-1.72161	0.503004	0.245388	0.13359	0.83963
PPP4C	-1.72904	0.714516	0.305189	0.0761202	0.633213
MED19	-1.73786	0.464123	0.108022	0.391421	0.774298
UBA1	-1.72039	0.765593	0.0335022	0.580228	0.34107
Ttyh1	-1.35258	1.04038	0.442776	0.599382	-0.729949
CREB5	-1.54778	1.17438	0.3937	0.176924	-0.197226
SFRP1	-1.48833	0.643955	0.540567	0.870179	-0.566374
NDUFV2	-1.75459	0.266448	0.560711	0.233561	0.693874
EIF3A	-1.63033	0.829384	-0.273063	0.499414	0.574597
SNRPB2	-1.70861	0.0771806	0.238631	0.541799	0.851
HMGB2	1.09319	-1.2918	-0.509933	-0.204813	0.913356
CAPZB	-1.68859	0.514661	0.449866	-0.0958438	0.819902
FAM133B	-1.74461	0.254911	0.608725	0.698126	0.182846
REXO2	-1.73373	0.401828	0.805117	0.414611	0.112178
SMARCD1	-1.73198	0.356336	0.0632077	0.719551	0.592887
NCOR1	-1.27168	0.998816	1.04253	-0.352284	-0.417387
ITPA	-1.63473	1.01506	0.0458139	0.0314304	0.542429
HES5	-1.46878	-0.0788781	-0.232267	0.574981	1.20495
SCRN1	-1.6927	-0.118368	0.627904	0.706846	0.476314
EOMES	1.78067	-0.491771	-0.529219	-0.476635	-0.283047
MRPS14	-1.645	-0.227107	0.651844	0.419139	0.801128
MTDH	-1.7542	0.635956	0.394334	0.586483	0.137427
PTP4A2	-1.30923	0.503514	1.36736	-0.230848	-0.330789
BAX	-1.72736	0.0946673	0.508669	0.320323	0.803697
ODF2	-1.52132	0.604073	-0.521769	0.80035	0.638662
IDH3G	-1.67664	0.6354	0.410783	-0.141748	0.772208
EIF4G1	-1.49631	0.876367	0.181454	0.876505	-0.438018
EFNB1	-1.11684	0.929527	0.558075	0.683086	-1.05385
MYCN	-1.57077	0.306041	1.01139	0.564846	-0.311507
LAGE3	-1.75677	0.237064	0.739433	0.333671	0.446605
RPLP0	1.5844	-0.88508	-0.226399	-0.757624	0.284703
SYT11	-1.74462	0.378993	0.594423	0.670176	0.101023
MRPL24	-1.75954	0.377708	0.696789	0.198984	0.486057
ANAPC11	-1.60189	-0.196782	0.477971	0.276535	1.04417
Hist1h4i	-1.67631	0.924944	0.555701	0.0407551	0.15491
PAFAH1B3	-1.75829	0.468187	0.641018	0.508475	0.140609
ATRX	-1.54491	0.807172	-0.129924	0.966947	-0.0992845
SDHC	-1.69914	0.950157	0.129839	0.337881	0.281262
IER5	-1.6004	0.970804	0.261545	0.60836	-0.240307
ZFP36L1	-1.69711	0.223449	0.890318	0.523056	0.0602879
CUTA	-1.69658	0.426376	0.755784	-0.0865106	0.600932
TMEM167A	-1.76095	0.536967	0.30378	0.242069	0.67813
KIF1B	-1.48241	0.377244	0.085286	1.26253	-0.242647
IMPDH2	-1.46868	1.0898	0.435917	-0.510005	0.452973
EIF2A	-1.76585	0.67412	0.225897	0.405937	0.459901
RAP1A	-1.64508	0.0306908	0.819399	0.788234	0.0067557
WAPL	-1.28961	1.12614	0.351002	0.587387	-0.774915
Gm9493	-1.43549	0.393722	1.2964	0.0614631	-0.316091
Gltscr2	-1.60561	0.287624	0.366337	-0.137468	1.08912
RNASEH2C	-1.70797	0.454987	0.278094	0.0853895	0.889497
HNRNPA0	-1.68427	0.563515	-0.143242	0.746761	0.517232
HDAC3	-1.75934	0.215935	0.508284	0.338688	0.696435
GSK3B	-1.54662	0.397583	-0.248544	1.15238	0.245206
ANKRD11	-1.58226	1.13779	0.433189	-0.0784722	0.0897512
PDCD6	-1.77252	0.336925	0.547318	0.285116	0.603162
MSI1	-1.46721	1.19444	0.022165	0.566167	-0.315562
BRI3	-1.52495	0.75404	1.0318	-0.190866	-0.0700198
PPIB	-1.63511	0.133319	0.19081	0.201127	1.10986
NOP56	-1.63941	1.09036	0.251079	0.059478	0.238495
FBL	-1.47274	1.18475	0.0889004	-0.34749	0.54658
MRPL15	-1.77199	0.505603	0.528565	0.206377	0.531448
COMMD3	-1.70595	0.241759	0.905789	0.444943	0.113456
APRT	-1.50415	1.25391	0.317369	0.142885	-0.210009
PMF1-BGLAP	-1.70718	0.132473	0.288558	0.362351	0.923801
MAPK1	-1.76736	0.653749	0.494697	0.389419	0.229497
DCAKD	-1.56054	0.922833	0.573561	-0.40499	0.469139
NAA50	-1.73439	0.0494932	0.416835	0.557508	0.710552
DCTPP1	-1.62997	0.600602	0.696151	-0.303677	0.636893
Bclaf1	-0.806822	1.61878	-0.514985	0.30937	-0.606347
NPC2	-1.60587	-0.0214472	0.52874	0.0307727	1.0678
RAD21	-1.67382	-0.116294	0.381832	0.858053	0.550229
BRK1	-1.6085	0.687791	0.287504	-0.256337	0.889545
TKT	-1.58148	0.588371	0.771058	0.627535	-0.405488
STK16	-1.72557	0.675034	0.639948	0.39625	0.0143342
NDUFB2	-1.65203	-0.089833	0.663556	0.191978	0.886326
2810428I15Rik	-1.73398	0.038551	0.632605	0.415582	0.647244
CHD3	-1.77959	0.465226	0.274428	0.502923	0.537013
POLDIP2	-1.74457	0.546874	0.337197	0.135752	0.724751
CFDP1	-1.72517	0.224907	0.201779	0.437745	0.860738
HUWE1	-1.78672	0.473502	0.440028	0.371059	0.502127
SAP18	-1.62226	0.15038	1.12207	0.0621614	0.287654
RP9	-1.70737	0.707719	0.727163	0.231439	0.041051
YWHAZ	-1.46899	0.102478	-0.257886	0.340116	1.28428
PFDN6	-1.75836	0.480935	0.710372	0.207774	0.359277
MLLT10	-1.65965	0.981594	0.45053	0.27681	-0.0492826
TTYH3	-1.44761	0.706618	0.468208	0.894247	-0.62146
PSMD8	-1.77892	0.43353	0.472615	0.289315	0.583461
SSR4	-1.77918	0.323218	0.406001	0.441301	0.608659
Fam60a	-1.67447	0.808976	-0.150855	0.472887	0.543457
TGIF2	-1.78365	0.513077	0.329406	0.42629	0.51488
BOD1L2	-1.01833	0.464403	1.47401	-0.184946	-0.735141
SSR1	-1.59759	0.380542	0.250569	1.10496	-0.13849
MPPED2	-1.75394	0.25701	0.696451	0.561827	0.23865
CHCHD1	-1.65736	0.00821873	0.700205	0.0791282	0.869804
SMC6	-1.75262	0.406251	0.570294	0.649665	0.126411
GOT2	-1.46534	1.16889	-0.125229	-0.226122	0.647811
DTYMK	-1.59077	0.186781	0.617646	-0.2167	1.00305
NAA10	-1.61627	1.08882	0.428558	0.131912	-0.0330184
SIN3B	-1.66925	0.186583	0.233916	0.209407	1.03934
Znrd1	-1.6359	0.691304	0.59984	-0.289527	0.634278
LAPTM4A	-1.69487	-0.111727	0.706986	0.477253	0.622359
KLF13	-1.40047	0.726195	1.00087	0.314321	-0.640918
NDUFB6	-1.6629	0.150018	0.352341	0.124932	1.03561
TBL1Y	-1.62223	1.0882	0.13092	-0.00559559	0.408701
CAMTA1	-1.71824	0.604342	0.512471	0.646357	-0.0449306
ROCK1	-1.53032	0.668795	0.115693	1.0509	-0.305066
TSEN34	-1.58724	-0.14033	0.253859	0.34275	1.13096
GEMIN7	-1.60351	0.094047	0.605737	-0.115872	1.0196
Fam92a	-1.75703	0.252106	0.647597	0.251997	0.605325
GRPEL1	-1.61888	0.521552	0.919084	0.440273	-0.262029
SMS	-1.45731	0.339134	-0.158366	-0.0404636	1.31701
THRAP3	-1.6741	0.635062	-0.0731086	0.847899	0.264243
EIF4E2	-1.73761	0.686594	0.0674224	0.389259	0.594334
PEA15	-1.44694	-0.164599	0.868974	1.02261	-0.280041
Gm8730	-1.541	0.118441	1.19895	0.384577	-0.160972
PRPF38B	-1.68417	0.799773	0.0158378	0.704931	0.163624
MRPL52	-1.59428	-0.38213	0.693827	0.576651	0.705929
Myeov2	-1.63611	-0.226661	0.402196	0.583055	0.877523
TIMM17B	-1.7815	0.357758	0.581394	0.473515	0.368831
NDUFS4	-1.75607	0.157335	0.647168	0.376045	0.575522
NAA15	-1.64363	0.277583	0.139326	1.08749	0.139225
PAX6	-1.63804	-0.241934	0.851675	0.560193	0.468107
AURKAIP1	-1.70529	0.386012	0.561627	-0.0338072	0.79146
ARHGDIA	-1.67674	0.377996	0.0302677	0.287644	0.980828
EPHA5	-1.529	0.253922	0.737476	0.943078	-0.405474
ABHD17A	-1.24085	1.14817	0.613616	0.30069	-0.821624
TAF1D	-1.68357	0.73894	0.702291	0.341372	-0.0990322
LAMTOR5	-1.68086	0.571438	0.82765	-0.107593	0.389362
CDH2	-1.23686	0.591233	0.264588	1.18501	-0.803964
CCND2	-1.70562	0.365927	0.136884	0.273632	0.929173
VARS1	-1.55776	1.13995	0.143576	0.465509	-0.191283
NDUFS7	-1.6515	-0.0900411	0.481764	0.284327	0.97545
ZNF462	-1.60572	0.886641	-0.286775	0.656929	0.348922
MRPL14	-1.68193	0.144993	0.489307	0.0984444	0.949189
TARDBP	-1.73979	0.656853	0.0544955	0.584411	0.444032
COX14	-1.61866	-0.178963	0.984525	0.251536	0.561562
SLIRP	-1.7314	0.0186499	0.587328	0.45394	0.671482
PGRMC1	-1.66645	1.00181	0.383668	0.012742	0.268235
HNRNPH2	-1.76138	0.325793	0.586001	0.633467	0.216123
ZCCHC3	-1.38467	1.31318	0.225211	-0.461379	0.307653
MN1	-1.37624	0.276536	0.417879	1.24158	-0.559756
BOLA3	-1.71903	0.473048	0.824895	0.0491893	0.371894
HSPA4	-0.824989	1.58489	-0.350293	0.343337	-0.752946
KPNA2	1.78123	-0.571162	-0.34408	-0.371128	-0.494855
PHPT1	-1.58894	-0.254195	0.196957	0.731106	0.91507
FIS1	-1.63025	-0.0604524	0.306284	0.313703	1.07071
AP2S1	-1.3116	0.22942	-0.0510903	-0.322838	1.45611
MPC2	-1.6033	0.343421	1.11475	0.243294	-0.0981709
MRPS15	-1.66996	0.866378	0.634809	0.231714	-0.0629442
POLR2H	-1.58186	0.994939	0.698233	-0.139615	0.0283014
FKBP8	-1.74564	0.303652	0.197504	0.468695	0.775789
MRPL12	-1.60239	0.916207	0.762144	-0.105643	0.0296829
CANX	-1.34774	0.650786	0.0565926	1.20104	-0.560681
TMEM14C	-1.56471	1.03732	0.48944	0.36202	-0.324073
AZIN1	-1.59996	0.265002	0.462984	1.05863	-0.186654
EIF3D	-1.18869	1.12875	-0.179402	-0.671566	0.91091
BOLA1	-1.75235	0.306207	0.404303	0.266607	0.775229
UBA52	-1.46235	0.112965	0.939994	0.868538	-0.459141
USP34	-1.59536	1.12647	0.00873458	0.430015	0.0301388
EID1	-0.743239	0.896073	1.26897	-0.602233	-0.819568
MFAP2	-1.50114	-0.297592	0.912791	-0.0219968	0.907937
SNX3	-1.67535	-0.186851	0.624046	0.584717	0.653434
HMGA2	-0.0769263	1.74722	-0.501287	-0.526603	-0.642409
NISCH	-1.57483	0.771601	-0.29656	0.209437	0.890353
NHP2	-1.46495	0.45227	0.224798	-0.4087	1.19658
CKAP2L	-1.56649	-0.0644482	0.152336	0.277992	1.20061
CDCA7	-1.64637	0.246325	0.401912	-0.0343832	1.03251
LIX1L	-1.10326	1.34654	0.420611	0.203017	-0.866907
TAF11L4	-1.67601	0.930394	0.551126	0.0604041	0.134083
ARPC5L	-1.75496	0.543182	0.620347	0.114963	0.476468
MRPL17	-1.76164	0.396852	0.702733	0.216703	0.445352
FYTTD1	-1.47305	0.793764	0.522335	0.754833	-0.597885
PARP1	-0.433938	1.7313	-0.828751	-0.328278	-0.140336
Rpl23a-ps3	-1.40135	0.0352915	1.38045	-0.261369	0.246977
Ier3ip1	-1.5885	-0.380549	0.64857	0.519898	0.800577
Snhg6	-1.74333	0.395836	0.12374	0.470437	0.753318
PHF14	-1.65642	0.923179	-0.142692	0.433622	0.442307
MIEN1	-1.6758	0.372946	0.225468	0.0796723	0.997711
KIF2A	-1.35561	1.2	0.691484	-0.0436821	-0.492195
COPS4	-1.57623	0.559192	0.690689	-0.416688	0.743041
RBM10	-1.52124	1.23788	0.348037	0.0906997	-0.155374
POLR2A	-1.60035	0.909234	-0.0011639	-0.0854449	0.777728
SCD	-1.66658	0.714637	-0.204721	0.556635	0.600033
MYL12B	-1.76441	0.302811	0.552918	0.650062	0.258614
LAMP1	-0.993209	0.863625	0.984634	0.255347	-1.1104
ZFAND5	-0.754136	0.833924	0.830064	0.448659	-1.35851
FAM168B	-1.41214	1.36373	0.208829	0.13145	-0.291871
MRPL41	-1.7739	0.451313	0.629099	0.264926	0.428557
WSB1	-1.73565	0.753266	0.417167	0.490369	0.0748528
CKAP5	-1.57114	0.16534	-0.156738	1.14104	0.421492
SPAG7	-1.7079	0.303229	0.648112	0.00087468	0.755689
Gtf3c2	-1.62711	1.03494	-0.133574	0.373207	0.352538
TIAL1	-1.73719	0.795475	0.125131	0.421222	0.39536
Eno1	1.738	-0.454074	-0.069701	-0.731938	-0.482282
BUB1B	-1.33757	0.567625	0.425375	1.08014	-0.735566
NDN	-1.50009	0.559945	0.547736	-0.531526	0.923935
ZC3H13	-1.44644	1.17325	-0.101561	0.662121	-0.287366
SERF1A	-1.54295	-0.485707	0.603804	0.66923	0.755619
TCEA1	-1.73379	0.137645	0.248376	0.724318	0.623453
MRTO4	-1.67557	0.415933	0.267652	0.0185849	0.973395
SEPHS2	-1.48926	1.28566	0.317421	0.0478572	-0.161676
PRMT5	-1.63195	0.91867	0.677767	-0.11031	0.145818
FRAT2	-1.18908	0.845225	1.02314	0.205411	-0.884689
PDIA6	1.78326	-0.495269	-0.334238	-0.412981	-0.540769
KIF15	-1.62655	0.756971	-0.236285	0.791718	0.314145
HNRNPUL2-BSCL2	-1.59937	0.67923	0.34708	0.876442	-0.30338
RPS15	-1.73903	0.382467	0.359387	0.179893	0.817287
U2AF2	-1.71602	0.913538	0.278564	0.316184	0.207734
DAD1	-1.68565	-0.036531	0.888395	0.315901	0.517886
NEK6	-1.44115	1.03972	0.711044	0.225018	-0.534631
IMP3	-1.68069	0.745082	0.779719	0.0802091	0.0756825
SCAND1	-1.53315	0.255171	0.13177	-0.101471	1.24767
COQ7	-1.63034	0.205929	0.482524	-0.08727	1.02915
TNFAIP1	-1.78297	0.57557	0.360697	0.447845	0.398854
OST4	-1.64883	-0.0892212	0.233321	0.960742	0.543991
NDUFA3	-1.4209	-0.63214	0.453198	0.580477	1.01936
TXNDC17	-1.48737	1.07032	0.732391	-0.325033	0.00969549
AKT1S1	-1.74085	0.173163	0.554101	0.263141	0.750449
RBM5	-1.72217	0.866575	0.270137	0.432062	0.153395
RALBP1	-1.75635	0.306273	0.268007	0.431426	0.750646
ZNF428	-1.40758	0.149512	0.773903	1.04216	-0.557993
PSMD6	-1.26824	0.256221	0.349515	-0.664814	1.32732
Ict1	-1.67432	0.375199	0.581131	-0.120809	0.838797
HIRIP3	-1.58288	0.335737	0.0250337	0.0478732	1.17424
Asna1	-1.61395	0.230233	-0.0980645	0.398323	1.08346
HMGN5	-1.51353	-0.157013	-0.0218121	0.491169	1.20119
QKI	-1.54311	-0.265171	0.0823644	0.701247	1.02467
MRPS17	-1.61012	-0.168994	0.894593	0.136116	0.74841
NCBP2AS2	-1.71324	0.456162	0.79691	-0.0105195	0.470687
YTHDF1	-0.957831	1.24676	0.899122	-0.510425	-0.677631
BC005561	-1.43042	0.542241	0.846283	0.707532	-0.665632
CREBBP	-1.70338	0.681269	-0.0743608	0.665931	0.430544
SCP2	-1.67335	0.266322	0.688877	0.804353	-0.0862015
IGF2BP1	-0.027121	1.71471	-0.295364	-0.659848	-0.732381
TFG	-1.54124	0.94151	0.493192	0.547857	-0.441324
Tomm5	-1.37163	1.13725	0.677269	0.144985	-0.587868
PDE6D	-1.73601	0.0737847	0.462516	0.446129	0.753578
TSPAN6	-1.77983	0.611162	0.409653	0.341892	0.41712
CDC34	-1.21101	1.30561	0.688523	-0.546685	-0.23644
NKTR	-1.67006	0.733488	-0.176437	0.450794	0.66222
TNRC6C	-1.11573	0.912428	1.18268	-0.340885	-0.638492
KIAA1191	-1.75961	0.22985	0.708847	0.486423	0.334487
LSM1	-1.69396	0.263782	0.752302	-0.025208	0.703083
Rps10	-1.70364	0.682097	0.33961	-0.0361908	0.718125
NRARP	-1.31905	0.337609	1.2889	0.314034	-0.621489
MED22	-1.78358	0.416486	0.337134	0.489404	0.540558
PRDX4	-1.64548	0.65766	0.789477	0.428511	-0.230166
TTC14	-1.74111	0.734822	0.146686	0.292659	0.56694
PKN2	-1.65089	0.497832	0.322856	0.952634	-0.122437
SNRNP25	-1.75251	0.435234	0.751554	0.197953	0.367771
DNAJA1	1.78287	-0.576091	-0.371169	-0.381709	-0.453901
PPP2R2A	-1.64734	0.741745	0.704213	-0.230895	0.432276
CDC20	1.77179	-0.675814	-0.410349	-0.325496	-0.360133
Rpl7a	-1.66293	0.60789	0.0488288	0.0808967	0.925314
TXNL4A	-1.72996	0.550543	0.790251	0.150389	0.23878
STK25	-1.75543	0.52641	0.712185	0.275711	0.241124
HEY1	-1.35597	1.2308	0.627473	0.000428057	-0.50273
ARPC4	-1.71628	0.177228	0.131185	0.78968	0.618191
CSNK1D	-1.53576	0.984812	0.480324	0.503489	-0.432864
RPS19BP1	-1.78028	0.31904	0.584461	0.400488	0.476286
ARL6IP1	1.75078	-0.687135	-0.406028	-0.530728	-0.126885
PRMT1	1.76791	-0.52789	-0.420008	-0.613997	-0.20601
MRPL33	-1.66312	-0.030865	0.845863	0.705062	0.143065
Morf4l1	1.71649	-0.822682	-0.495883	-0.359874	-0.0380511
CRIPT	-1.66262	0.0846153	0.463902	0.113942	1.00017
MDK	1.78263	-0.564041	-0.344677	-0.478295	-0.395619
PPP1CC	1.73506	-0.281086	-0.287127	-0.312014	-0.854837
PRDX1	1.7517	-0.643286	-0.307071	-0.626916	-0.174425
OSGEP	-1.65232	0.321634	0.750083	0.756787	-0.176185
ZNF219	-1.46233	1.22294	0.538485	-0.274653	-0.0244396
EHBP1	-1.74032	0.686942	0.626687	0.124914	0.301774
TAF15	-1.5163	1.10902	0.0332887	-0.260131	0.634125
RAB24	-1.70961	0.0326995	0.522926	0.315389	0.838596
BAG6	-1.62706	0.972318	0.493519	0.355121	-0.193895
FKBP3	1.77359	-0.576223	-0.227176	-0.477354	-0.492833
TP53	-1.48779	0.714479	0.104483	-0.38718	1.05601
BIRC5	-1.73492	0.201182	0.433936	0.270152	0.829645
DLL3	1.78725	-0.393386	-0.491554	-0.484929	-0.417381
AIMP1	-1.6916	0.410829	0.11633	0.209245	0.955195
CLIC4	-1.55282	0.415735	-0.269221	1.12421	0.282095
MPP6	-1.14289	1.31145	0.717444	-0.260417	-0.625587
RPS27	-1.19925	-0.40237	-0.321008	1.43492	0.487705
PAK2	-1.46215	0.83167	0.229041	0.92093	-0.519492
SOD2	-1.59265	0.0211121	0.230964	0.164765	1.17581
ANP32E	1.7793	-0.552638	-0.425822	-0.284956	-0.515888
PSIP1	1.75499	-0.27196	-0.439075	-0.289254	-0.754705
SLC25A5	1.76368	-0.432751	-0.260882	-0.71053	-0.359515
Gm10073	-1.53063	0.192055	0.615509	-0.338479	1.06154
MYH10	-1.56956	0.536474	-0.426199	0.763476	0.695805
EEF2	1.73866	-0.303651	-0.563611	-0.741926	-0.129467
ATP6V1F	-1.70946	-0.00656311	0.641341	0.326506	0.748178
KANSL2	-1.77109	0.545558	0.468049	0.206071	0.551417
IGFBPL1	1.71341	-0.778273	-0.564029	-0.374648	0.00353553
PCMT1	-1.72371	0.065867	0.322117	0.548184	0.787542
ARID1A	-1.20063	0.656719	-0.537303	-0.251223	1.33244
SNRPD1	-1.69266	0.379255	0.324675	0.0489158	0.939816
PPP2R2D	-1.31125	1.18496	0.677688	0.0884439	-0.639847
Ppp1r1a	-1.26674	-0.00186667	1.38814	0.420486	-0.540017
ACTR1A	-1.50093	0.0494093	-0.0160421	0.156022	1.31155
SF1	-1.17764	1.32466	-0.347771	0.69926	-0.49851
VANGL2	-0.74407	1.06529	-0.0560486	0.933532	-1.1987
TMEM11	-1.73626	0.727678	0.577314	0.0939534	0.337311
EFTUD2	-1.59738	0.759514	0.509181	0.692653	-0.363965
SKP2	-1.53878	1.21701	0.220528	0.271167	-0.169932
ATP5F1D	-1.71446	0.376264	0.413543	0.0619785	0.862672
SNRPG	-1.57102	-0.287034	0.218818	0.649242	0.989999
CDCA3	-1.60231	-0.0373967	0.371708	0.139453	1.12854
E130114P18Rik	-1.53346	-0.00685344	1.12257	0.596853	-0.179109
PDCD4	-1.20963	0.574647	0.341947	1.15813	-0.865094
ECT2	-1.00228	0.189431	-0.0828572	1.57735	-0.681646
MRPL13	-1.5602	0.472211	0.261034	-0.269422	1.09638
Rpl36al	-1.7459	0.589934	0.497792	0.0650521	0.59312
DNAJC5	-1.68864	0.798997	0.225133	0.67768	-0.0131742
DDAH1	-1.40013	-0.467159	0.935352	0.972057	-0.0401154
KLHL9	-1.03716	1.16557	-0.230053	0.919051	-0.817413
WBP1	-1.68254	0.368181	0.228718	0.10016	0.985478
COPE	-1.62548	-0.0654456	0.442418	0.189278	1.05923
JUN	-1.3288	0.15797	1.28426	0.469398	-0.582819
UBE3A	-1.532	0.905223	0.229791	0.790922	-0.393935
EVL	-0.493437	1.06815	1.01742	-0.400471	-1.19166
MPC1	-1.54504	-0.479856	0.601222	0.649867	0.77381
RPS9	1.64773	-0.645083	-0.326766	-0.8545	0.178619
KIF20B	-1.38934	0.569046	0.215114	1.17337	-0.568191
ORC6	-1.76307	0.599602	0.336386	0.609593	0.217489
KAT6B	-1.67802	0.712995	0.164465	0.805482	-0.00491754
Rpl4	1.66817	-0.491006	-0.496677	-0.839198	0.158715
ATP5MF	-1.68963	-0.0749979	0.643414	0.340385	0.780827
Rps3	1.64153	-0.466711	-0.489206	-0.896518	0.210901
POU3F3	-1.6073	0.133611	-0.176721	0.877924	0.77249
NXT1	-1.35931	1.10759	0.856582	-0.235909	-0.368954
CCDC115	-1.72163	0.807716	0.527014	0.068934	0.317962
Capza1	-1.74264	0.810193	0.368003	0.204564	0.359883
C1orf131	-1.73396	0.601336	0.181025	0.746187	0.205417
GABARAP	-1.69111	0.241044	0.449551	0.0647019	0.935816
GNB2	-1.60677	-0.0321566	0.474663	0.0750859	1.08918
SENP6	-0.977914	1.14396	0.141926	0.759107	-1.06708
NEDD4	-1.73564	0.767161	0.15652	0.555789	0.256169
ARX	-1.28865	0.784129	1.18951	-0.148876	-0.536118
ANKRD10	-1.65216	1.07457	0.239062	0.194009	0.144515
TUBB	1.66467	-0.633583	-0.422846	-0.785619	0.177382
COX6A1	-1.4825	-0.30778	0.263723	0.277094	1.24946
KIF23	-1.64093	0.121311	0.927049	0.655205	-0.0626365
PHF3	-1.58219	1.13168	0.113383	0.439015	-0.101879
ZMIZ1	-1.68434	0.198955	0.0847399	0.44022	0.96043
NGDN	-1.7076	0.402639	0.889354	0.357233	0.0583776
ZNF131	-1.61191	0.442064	0.761671	0.72508	-0.3169
Fkbp2	-1.61159	-0.195908	0.208647	0.653294	0.945555
EMX2	-0.497727	1.60924	0.303678	-0.52183	-0.89336
HMGB1	1.27545	-1.29832	-0.304242	-0.356797	0.683903
CHMP2A	-1.68353	-0.0978803	0.695867	0.339407	0.746136
PRDX2	1.65228	-0.67528	-0.526464	-0.691811	0.24128
CCDC34	-1.66746	-0.132222	0.482666	0.432845	0.884174
GPX1	-1.28517	1.27511	0.614369	-0.587096	-0.0172053
USP22	-1.57207	1.05134	-0.262114	0.546566	0.236277
KTN1	-1.5321	-0.100469	0.181728	1.25318	0.197663
FABP5	-1.50173	0.786488	-0.234183	-0.0823658	1.0318
HAX1	-1.69298	0.449654	0.378267	-0.0226577	0.887715
TENM4	-1.40364	1.25208	0.0402844	0.532222	-0.420952
CTNNA1	-1.52981	0.371587	0.829428	0.788739	-0.459945
PPP2CA	-0.680111	0.803029	1.23681	-0.211632	-1.14809
Ppih	-1.71832	0.41591	0.415287	0.050858	0.836266
SSBP2	-0.112046	1.50049	0.150329	-0.254869	-1.28391
PSMB5	-1.5722	0.705685	0.0506528	-0.181475	0.997341
SMO	-1.05261	1.30727	0.269715	0.435246	-0.959623
SRSF5	-1.7484	0.540825	0.490296	0.635209	0.0820675
HNRNPR	-1.67317	-0.0508672	0.444634	0.941197	0.338202
PPID	-1.58059	0.899475	0.611953	0.431954	-0.362796
BPTF	-1.4743	0.564942	-0.515866	0.376805	1.04842
DNAJC15	-1.75497	0.744351	0.289465	0.255236	0.465919
DDX52	-1.63178	1.03608	0.507321	0.0799154	0.00845515
DDX24	-1.69445	0.519274	0.51007	0.767194	-0.102083
ERI3	-1.64382	-0.157994	0.497068	0.356862	0.947881
BEX1	-1.77531	0.240936	0.567745	0.464436	0.502191
SRRT	-1.40819	0.712796	-0.431167	-0.023422	1.14998
PHF23	-1.6167	1.02239	0.583907	0.00610056	0.00429534
LAMTOR1	-1.74001	0.747395	0.253826	0.173922	0.564871
Nabp2	-1.46704	0.304108	-0.315635	0.208904	1.26966
CSE1L	-1.55205	0.282414	-0.290098	0.455168	1.10456
MMD	-1.65971	0.5825	0.849411	0.39551	-0.167709
TRAPPC13	-1.6541	0.619343	0.759348	0.502289	-0.226883
MRPL21	-1.62426	0.697374	0.843039	-0.242005	0.32585
RCC2	-0.755282	1.5059	0.0325967	-1.04508	0.261868
Hdgfrp3	-1.51583	0.569885	-0.18281	1.15895	-0.0301895
SKA2	-1.31232	1.28071	-0.578058	0.0623496	0.547322
SMIM30	-1.50128	-0.25017	0.332938	0.176978	1.24153
R3HDM4	-1.78706	0.405398	0.479658	0.501915	0.400091
COMMD6	-1.6136	0.569304	0.923807	0.38545	-0.264964
Tmem55a	-1.76809	0.500822	0.6329	0.214071	0.420296
KDELR1	-1.58349	1.08857	0.286106	-0.214895	0.423706
MIX23	-1.59026	0.351092	0.0300965	0.0495794	1.1595
DUT	-1.38953	1.0179	-0.206202	-0.352805	0.930636
EMD	-1.38486	1.44191	0.00992248	-0.0527185	-0.0142539
MRPL43	-1.72569	0.452407	0.40704	0.0613201	0.804919
CHD6	-1.45188	0.750416	-0.156563	1.11323	-0.2552
Tmem261	-1.74187	0.456674	0.799652	0.239059	0.246482
MXD3	-1.74657	0.16511	0.56169	0.301576	0.718191
UQCRB	-1.70789	0.000383856	0.817767	0.541223	0.348512
Atp5g1	-1.65606	0.107748	0.694197	-0.0196974	0.873814
FGFR1OP2	-1.74335	0.793989	0.244559	0.45755	0.247256
MRPS16	-1.68447	0.0906675	0.429987	0.199655	0.964157
MEA1	-1.76926	0.428533	0.584427	0.207062	0.549235
IMMP1L	-1.68679	0.0833456	0.959698	0.222965	0.420782
MARK3	-1.24639	0.750413	1.2608	-0.356824	-0.408002
LHX9	1.78651	-0.358605	-0.465541	-0.48118	-0.48118
RBM25	-1.74302	0.733708	0.117896	0.524287	0.367127
OLA1	-1.39567	1.42743	0.0536833	-0.105964	0.0205206
GPM6B	-1.32331	-0.622626	0.793268	1.10906	0.0436031
HIGD2A	-1.70405	0.431217	0.635103	-0.0707352	0.708462
EIF3M	-1.57884	1.10878	0.522928	-0.0652934	0.0124203
NAA20	-1.7027	-0.0710446	0.433687	0.740005	0.600055
ENAH	-1.10031	0.795519	-0.934344	0.11176	1.12738
EIF1AX	-1.40558	1.10858	0.728345	0.0775034	-0.508848
DCAF8	-1.61576	0.600303	0.569912	0.77273	-0.327187
C1orf43	-1.60282	0.670786	0.0425451	0.984937	-0.0954516
TRAF7	-1.67896	0.505232	0.361152	-0.0760443	0.888615
TBCA	-1.71778	0.028715	0.785223	0.560021	0.343821
PHB2	-1.51607	0.739111	0.200917	-0.400802	0.976847
PAPOLA	-1.71799	0.629574	0.0761347	0.247284	0.764994
HSD17B10	-1.68503	0.242732	0.994127	0.143366	0.304806
RSL24D1	-1.7742	0.436075	0.316624	0.369231	0.652273
ARL6IP4	-1.66241	0.264786	0.499478	-0.0576113	0.95576
SPIN1	-1.70155	0.690603	0.210839	0.762853	0.0372588
VPS36	-1.63785	0.378854	0.603466	0.873155	-0.21763
LSM3	-1.55073	0.91795	0.852573	-0.138029	-0.081768
PRKACA	-1.2779	0.92351	0.951965	0.164524	-0.762097
Ptbp1	-1.68972	0.825792	0.00908242	0.206663	0.648178
SHISA2	-0.198668	0.935693	0.905368	-0.14422	-1.49817
GRB10	-1.59347	1.05041	-0.166651	0.552171	0.157541
RABL6	-1.69688	0.958362	0.130394	0.314668	0.293457
MIIP	-1.76976	0.38601	0.409723	0.682843	0.291187
Afg3l1	-1.76773	0.50696	0.192145	0.462761	0.605859
PARL	-1.71897	0.763159	0.624095	0.0704514	0.261268
H2afz	1.49052	-1.17454	-0.111339	-0.529787	0.325146
TRIM28	-0.675827	1.46042	0.620984	-0.566814	-0.838764
Myl6	-1.67493	0.0144744	0.30808	0.372017	0.980356
PLAGL1	-0.79148	0.372088	0.546519	1.14647	-1.27359
Uchl3	-1.37302	0.344255	1.11586	0.567751	-0.654842
COMMD8	-1.73301	0.583208	0.608836	0.534638	0.00632409
ZNF48	-1.42529	1.24894	0.538312	-0.0175491	-0.344418
BTBD2	-0.932985	1.13516	1.03633	-0.620958	-0.617552
HMGCR	-1.35196	0.750281	0.205717	1.0607	-0.664738
GTF2A2	-1.67698	-0.00662126	0.767895	0.158892	0.756818
NUDC	-1.72343	0.134389	0.501485	0.253221	0.834336
DSTN	-1.68846	-0.0365964	0.256463	0.776727	0.691868
NDUFA13	-1.49759	-0.265874	0.555656	0.0345167	1.17329
SNRPC	-1.35686	0.0880885	-0.100518	-0.0911103	1.4604
CYB5B	-1.42879	0.761079	0.200229	1.01794	-0.550459
NUP37	-1.67475	0.0814292	0.967991	0.145249	0.480081
FAM162A	-1.52034	0.628761	0.356644	-0.447712	0.982645
PSMA6	-1.55197	0.695152	0.624589	-0.471712	0.70394
TCERG1	-1.24083	0.955139	-0.562078	1.08447	-0.236704
RFXAP	-1.17859	0.724581	1.10198	0.251167	-0.899146
RBM27	-1.69021	0.707302	0.390747	0.692891	-0.100733
NDUFS5	-1.4266	-0.44397	0.568436	0.104808	1.19733
MAF1	-1.7193	0.00808637	0.765929	0.545102	0.400185
DDX17	0.0763512	1.42649	-0.960571	0.395786	-0.938058
SLC38A1	-1.22419	1.32718	-0.23865	0.648255	-0.512598
Gm26699	-1.61448	0.73114	0.381322	0.792982	-0.290964
TEX261	-1.73109	0.49913	0.781109	0.0797891	0.371065
NFYB	-1.72712	0.460426	0.844194	0.250826	0.171678
RBM14	-1.61317	1.01409	0.316681	0.479697	-0.197298
ACP1	-1.57857	0.571208	1.08363	0.0103495	-0.0866176
SRP9	-1.58158	0.181033	1.17322	0.291929	-0.0646088
CSDE1	-0.712805	1.39924	-1.17942	0.142851	0.350134
RNF11	-1.34264	0.634792	1.01183	0.449823	-0.7538
TMEM160	-1.57703	0.942191	0.738033	0.142341	-0.245532
ALKBH1	-1.52189	0.872274	0.893759	-0.339293	0.0951536
WDR43	-1.75638	0.548372	0.361914	0.673542	0.172553
CST3	-1.57748	-0.376861	0.656509	0.429452	0.868383
Mettl10	-1.70833	0.337186	0.913478	0.108917	0.348745
Banf1	-1.5409	-0.0825529	0.151325	0.229922	1.2422
BTG1	-1.61321	-0.0671239	0.949267	0.700734	0.0303314
CFAP20	-1.56257	0.0931216	1.03736	0.652065	-0.219973
HES1	-0.883123	0.0519319	1.14746	0.803821	-1.12009
LARP4B	-1.767	0.394407	0.255224	0.686658	0.430712
SRPK2	-1.65117	0.21715	0.405217	-0.00185399	1.03066
ERP29	-1.61577	0.655616	0.253171	0.921573	-0.214586
CHTF8	-1.36752	1.45555	0.0113558	-0.10535	0.00595846
PRDX5	-1.63937	-0.27644	0.700535	0.549013	0.666257
PBK	-1.33096	-0.593168	0.320328	0.307948	1.29586
CAB39	-1.58345	0.930544	0.770253	0.0566478	-0.173994
MRPL38	-1.77559	0.459017	0.469955	0.253995	0.592625
TK1	-1.67004	0.505838	0.393687	-0.116374	0.886886
CEBPZ	-1.69784	0.707257	0.149237	0.767742	0.0736062
SPOP	-1.66812	-0.192536	0.498862	0.635045	0.726748
CCNT2	-1.68009	0.82902	0.685466	0.0260039	0.139598
NRDC	-1.61361	1.11163	0.311715	-0.0552963	0.245559
STAG1	-1.60817	0.175804	-0.124755	0.500145	1.05697
KCTD20	-1.57479	0.736784	0.562444	0.69585	-0.420291
RPS4X	1.38868	-0.438483	-0.455152	-1.12775	0.63271
MAZ	-1.70802	0.596349	0.29038	0.0198354	0.801454
OCIAD1	-1.40077	1.02299	0.917978	-0.232991	-0.307212
ATOX1	-1.59702	-0.112716	0.402414	0.195206	1.11211
KNSTRN	-1.65573	-0.211345	0.578863	0.800758	0.487451
DNAJC1	-1.36274	1.33766	0.114161	0.365715	-0.454792
RCHY1	-1.65357	0.0570752	0.229127	0.31282	1.05455
TXNL1	-1.56355	0.652203	0.544545	0.802325	-0.435521
SMAP1	-0.989652	0.854221	1.26636	-0.410995	-0.719935
MEX3A	-1.62454	0.754045	-0.0831979	0.883415	0.0702775
Gcsh	-1.73673	0.660175	0.669166	0.111061	0.296331
VDAC1	-1.71786	0.205548	0.332307	0.2737	0.906301
FAM171B	-1.60509	-0.0974845	0.61892	1.01299	0.0706637
GSR	-1.68281	0.965532	0.445129	0.117033	0.155116
NCAM1	-1.50004	-0.0984228	0.609043	1.15795	-0.168534
Pam16	-1.73667	0.26615	0.602433	0.139574	0.728514
VPS29	-1.60153	-0.357138	0.782959	0.628874	0.546839
STOX2	-0.684612	0.66238	0.103204	1.20021	-1.28118
CDC5L	-1.42317	0.608717	-0.400457	0.0134408	1.20146
CALR	-0.481629	1.74903	-0.694244	-0.109542	-0.463618
Selt	-1.68188	0.229496	0.406826	0.973621	0.0719336
DDX21	-1.58651	0.244373	-0.257624	0.996451	0.603311
MSMO1	-1.55468	0.149431	-0.240815	1.09495	0.551115
Cs	-1.04767	1.56737	-0.479715	0.30773	-0.347712
USP1	-1.3128	1.06012	0.131162	0.811793	-0.690277
GTF3A	-1.70057	0.748039	0.00887474	0.244675	0.698977
TMEM126A	-1.69312	0.32483	0.899647	0.467388	0.00125786
XRN2	-1.69203	0.871436	0.215886	0.574574	0.0301303
TMEM256-PLSCR3	-1.37838	-0.746955	0.606832	0.656944	0.861564
DHX9	-1.45186	1.21621	-0.22362	0.588431	-0.129153
NAA38	-1.62621	-0.220669	0.508577	0.39295	0.945351
TULP4	-1.66041	0.309904	-0.148539	0.723547	0.775501
ETF1	-1.37503	1.01743	0.15498	0.818794	-0.61618
DNAJC19	-1.52159	-0.180015	1.09931	0.663425	-0.0611285
MAP1LC3A	-1.76829	0.287068	0.691007	0.372614	0.417604
RNF20	-1.71879	0.733692	0.0813369	0.236864	0.666894
FAM181B	-1.56391	0.297472	0.177881	-0.104397	1.19296
BCL7C	-1.4306	0.382188	0.879115	0.798841	-0.629543
Stra13	-1.61456	0.313215	1.06136	-0.144413	0.38439
SARS1	-1.61352	0.582347	-0.0334899	0.0375746	1.02709
LSM14A	-1.21529	0.36185	0.608667	1.12031	-0.875536
LUC7L2	-1.53974	0.728243	0.220603	0.957122	-0.366233
HS2ST1	-1.32293	0.797559	1.1822	-0.343595	-0.313235
C16orf91	-1.6445	0.661314	0.614052	0.639046	-0.269915
VBP1	-1.33999	-0.34999	-0.035845	0.319114	1.40671
Med10	-1.6494	-0.0351765	1.02412	0.255023	0.405431
ARFRP1	-1.51838	0.960423	0.258592	-0.424964	0.724327
BCL9	-1.59077	1.14879	0.0121844	0.384051	0.0457386
POLE4	-1.75534	0.436862	0.243622	0.324186	0.750666
TCOF1	-1.68538	0.969006	0.208772	0.0987357	0.40887
HSBP1	-1.59074	-0.295618	0.676327	0.294656	0.915376
TIA1	-1.56867	0.647474	0.161571	1.01442	-0.254796
LBR	-0.409596	0.534311	0.46654	0.960218	-1.55147
2810474O19Rik	-1.50304	0.879943	0.229401	0.843549	-0.449851
SOX21	-1.57073	0.445027	1.11634	0.215051	-0.205684
G2E3	-1.53784	-0.063021	-0.0678582	1.17654	0.492171
CELF2	-1.47645	-0.527711	0.343365	0.681112	0.979689
FAM136A	-1.49028	0.930498	0.876155	-0.376757	0.0603824
Wdr83os	-0.903782	0.171753	-0.135198	-0.740984	1.60821
MRPS36	-1.19638	0.966028	1.10584	-0.316594	-0.558886
NCBP2	-1.2365	0.789247	0.50449	0.863572	-0.920811
SPC24	-1.32327	-0.322244	0.168938	0.0219015	1.45468
CNOT6	-1.63901	0.407025	-0.138661	0.377594	0.993055
NDUFS2	-1.73653	0.82254	0.366767	0.164903	0.382323
Rfwd2	0.0997496	1.32308	0.532625	-0.829565	-1.12589
WDR77	-1.57532	0.706547	0.522446	0.758927	-0.412598
ACTR2	-1.30868	0.771562	-0.149614	1.19008	-0.50335
Rpl9-ps6	-1.78653	0.382882	0.425949	0.454843	0.522859
PRPSAP1	-1.70994	0.267494	0.883477	0.0953552	0.463611
PCM1	-1.1186	0.0961173	-0.738288	1.44796	0.312815
MT-ND3	-0.835568	0.68583	-0.447116	1.406	-0.809145
EIF4H	-1.66491	0.159296	0.13339	0.337246	1.03498
LUZP1	-1.38689	1.37925	-0.283997	0.305545	-0.01391
ZC3H14	-0.963406	0.556719	0.939599	0.665495	-1.19841
WTAP	-1.65705	1.02337	0.255721	0.376143	0.00181382
MTPN	-1.35636	0.261064	-0.409311	0.122745	1.38186
ASH2L	-1.57741	1.08604	0.436352	-0.237442	0.292458
SNF8	-1.57018	0.773802	0.632657	0.592797	-0.429077
CSRP2	-0.652073	1.37396	-0.147957	-1.15312	0.579196
UHRF2	-1.40842	0.753392	0.488847	0.856388	-0.690212
Wbscr22	-1.76898	0.561116	0.357944	0.242533	0.607386
ESD	-1.65934	-0.0104698	0.861497	0.702162	0.106153
PTPRA	-1.4663	0.541703	0.917842	0.600901	-0.594146
HCFC1	-1.55989	1.16717	-0.0842811	0.442943	0.0340602
IPO7	-1.6318	0.847163	0.267511	0.713685	-0.196559
POLDIP3	-1.43472	1.239	-0.0509228	0.555441	-0.308799
PTBP2	-0.556155	1.20401	0.218305	0.520403	-1.38657
LUC7L3	-1.70216	0.669976	0.362294	0.721055	-0.051169
USP5	-1.72847	0.78744	0.567113	0.206919	0.167001
NTAN1	-1.66819	0.0534696	1.01721	0.321854	0.27565
3110039M20Rik.1	-0.368371	1.31936	0.444475	-0.00767697	-1.38779
RPS25	-1.71696	0.317571	0.351323	0.150846	0.897222
SSR3	-1.15703	0.472925	0.284559	1.26674	-0.867192
AKR1B1	-1.62457	0.736676	0.675557	-0.305624	0.517964
IRF2BPL	-1.24593	0.813913	0.160496	1.06382	-0.792294
GTF3C6	-1.76146	0.395834	0.319258	0.309644	0.736726
C17orf49	-1.44218	-0.169499	1.35328	0.0138283	0.244568
MRPL20	-1.60946	0.331934	0.92215	-0.261604	0.616979
RER1	-1.70809	0.627609	0.767675	0.314978	-0.00217295
YWHAG	-1.36478	1.24397	-0.45561	0.61699	-0.0405666
ASH1L	-1.67617	0.494027	-0.161233	0.766741	0.576635
POLR2B	-1.5613	0.987249	0.419061	0.524744	-0.369758
EPN1	-1.71852	0.823	0.154135	0.558817	0.182568
RP23-207N5.2	-1.62266	0.76274	-0.129085	0.120695	0.868312
RCN1	-0.528136	1.20779	0.661838	0.00914577	-1.35063
SSBP3	-1.05378	0.923972	1.12317	-0.1219	-0.871467
Uba52	-1.14759	-0.738043	-0.00773329	0.530837	1.36253
KRTCAP2	-1.73933	0.449272	0.811127	0.227746	0.251185
SNRNP40	-1.73358	0.724568	0.443376	0.0449435	0.520688
ATXN10	-1.22021	1.33089	0.510003	0.0685402	-0.689225
UPF3B	-1.68139	0.747157	-0.138579	0.636443	0.43637
DKC1	-1.08799	0.962305	1.14478	-0.335718	-0.683382
BAZ1B	-1.16267	1.09978	-0.889658	0.787333	0.165222
MTAP	-1.34316	1.46457	0.134673	-0.130405	-0.125676
ILK	-1.65386	-0.145836	0.528622	0.915005	0.356073
ANAPC10	-1.60349	0.227844	0.866151	0.753199	-0.243707
THRA	-1.51624	1.01585	0.452033	0.505614	-0.457253
GKAP1	-1.62607	0.937555	0.675797	0.106583	-0.0938601
TRIM27	-0.860168	1.6722	-0.0781156	-0.673918	-0.0599954
NR2F1	-1.4762	0.696896	-0.210664	-0.137779	1.12775
C1orf53	-1.68539	0.957932	0.281599	0.0452836	0.40058
QARS1	-0.283139	1.70063	-0.0948061	-0.929612	-0.393077
SH3BGRL3	-1.68254	0.726676	0.425684	-0.134449	0.664626
CETN2	-1.70537	-0.0318671	0.452551	0.816556	0.468126
MRPL19	-1.78314	0.544017	0.502214	0.349581	0.38733
GJC1	-1.56399	1.06324	0.594741	0.133738	-0.227728
MRPL49	-1.66368	0.386252	0.0591444	0.198432	1.01985
Casc5	-1.4906	0.132655	0.274342	1.2828	-0.199195
RNF26	-1.62138	-0.0758958	0.0471706	0.795739	0.854366
LIN7C	-1.65763	0.55681	-0.108502	0.920289	0.289029
ZNF106	-1.49863	0.860836	0.0997531	0.924147	-0.386108
RGCC	-1.53505	-0.135236	1.03492	0.737462	-0.102102
ZMAT5	-1.63997	-0.0375297	0.373311	0.252554	1.05164
MTCH2	-1.14733	0.116279	0.279101	-0.698612	1.45057
IGF2BP2	0.132496	1.64717	-0.370109	-0.441265	-0.968291
NDUFV1	-1.41522	0.411362	-0.171426	-0.156641	1.33192
RPL39	1.60457	-0.838125	-0.492572	-0.607456	0.333586
KATNBL1	-1.71646	0.145808	0.380199	0.89469	0.295766
NELFA	-1.64568	0.992442	0.50156	-0.0720521	0.223726
Ormdl2	-1.62072	0.557383	0.897418	0.431865	-0.265947
TMEM242	-1.72925	-0.00429091	0.563875	0.522955	0.646712
CSNK2B	-1.43592	0.541282	0.191397	-0.473377	1.17662
STK39	0.183117	1.53379	-0.00983234	-0.573525	-1.13355
PRRC2A	-0.814728	0.881458	-0.439137	1.2579	-0.885493
SYF2	-1.71883	-0.022373	0.720258	0.561391	0.459555
THYN1	-1.68161	0.349396	0.394003	-0.00772594	0.945939
Asnsd1	-0.468	1.33039	0.436482	0.0494875	-1.34836
Fopnl	-1.64855	-0.00654223	1.02121	0.455649	0.178234
FOXP1	-0.593166	1.60282	-0.661378	-0.713138	0.364856
XPO1	-1.04553	0.851701	-0.795787	1.22231	-0.232695
TRNAU1AP	-1.66814	0.45554	0.792214	-0.173092	0.59348
ANKRD17	-1.60643	0.700296	-0.229593	0.227784	0.907945
Gm8186	-1.51298	0.0732967	1.30181	0.0433982	0.0944776
OXCT1	-1.45012	0.142308	0.0331376	-0.0918484	1.36652
SNRNP70	-1.47042	1.16079	0.655366	-0.148737	-0.196998
IGBP1	-1.54863	1.05974	0.241033	-0.317604	0.56546
PTRH2	-1.62796	1.12268	0.176288	0.118932	0.210052
IARS1	-0.924146	1.63128	0.0756217	-0.0974259	-0.685328
C3orf38	-1.75931	0.668271	0.520234	0.3965	0.174306
BRD4	-0.516983	1.6839	-0.415461	0.0945236	-0.845977
FARSB	-1.72218	0.745976	0.426901	0.00586758	0.543439
CLIP3	-1.52213	-0.049264	0.00132609	0.311667	1.2584
ZNF322	-1.57232	0.624737	0.504878	0.847702	-0.405001
PHGDH	-1.76431	0.222178	0.682598	0.465268	0.394263
FUNDC2	-1.5444	-0.185077	0.278491	0.250963	1.20002
AIMP2	-1.70992	0.719893	0.69674	0.0252315	0.268053
MPHOSPH10	-1.59828	0.756616	0.718531	0.479403	-0.356275
CEBPZOS	-1.67768	0.330657	1.00081	0.258267	0.0879522
SNW1	-1.75452	0.529691	0.678417	0.398788	0.147628
PDLIM7	-1.41818	0.386138	1.14199	0.459559	-0.569508
CHD4	-0.956113	0.828664	-1.0233	-0.0119444	1.1627
KMT2A	-1.56912	0.829732	-0.294768	0.179613	0.854546
1810043H04Rik	-1.70447	-0.0073947	0.753979	0.295285	0.662603
EXOSC1	-1.74355	0.208671	0.685419	0.217461	0.631995
BUD31	-1.04105	0.802428	-0.473953	-0.59076	1.30334
PRPF4B	-1.47919	0.170393	0.0629062	1.33108	-0.0851885
RHNO1	-1.48646	1.07352	0.240681	-0.445474	0.617735
CSPP1	-1.50541	0.143936	-0.289211	1.19072	0.459969
TACC2	-1.43595	1.22267	0.207613	0.45005	-0.44439
Rpl10-ps3	-1.44032	0.929042	0.976664	-0.242726	-0.222663
COMMD4	-1.58679	0.208569	0.251044	-0.0448128	1.17199
DNMT3A	-1.15617	1.24606	0.193095	0.577283	-0.860266
Erdr1	-1.3721	-0.196631	-0.0510779	0.191774	1.42804
SUDS3	-0.784758	0.774747	1.11353	0.13202	-1.23554
YAF2	-1.23126	0.559361	1.36775	-0.518602	-0.177243
GATAD2B	-1.65051	0.569843	-0.217098	0.824749	0.473018
NCBP1	-1.37658	1.3582	-0.11708	0.412285	-0.276833
USP10	-1.7173	0.857057	0.304333	0.463966	0.0919429
HECTD1	-1.61743	1.08928	-0.0112717	0.430611	0.108813
YLPM1	-1.63682	0.90773	-0.193902	0.590503	0.33249
TRIOBP	-1.68417	-0.0660343	0.40636	0.885371	0.458474
PPP2R5D	-1.70214	0.67506	0.0119016	0.251075	0.764099
HELLS	-1.58293	1.062	0.134242	0.563294	-0.176607
R3HDM1	-0.875346	0.932148	-0.0809999	1.09792	-1.07372
RNF126	-0.597853	0.968724	1.05526	-0.177509	-1.24862
SUV39H2	-1.26612	1.28928	-0.230201	0.678094	-0.47106
CHMP4B	-0.929879	0.0956518	1.58089	0.0439378	-0.790597
RPA2	-0.161361	1.19998	0.37786	0.12483	-1.54131
SH3BGRL	-1.42481	-0.668846	0.507318	0.734175	0.852161
MANBAL	-1.68534	0.15598	0.158783	0.393013	0.977563
Pym1	-1.75042	0.476465	0.126886	0.441214	0.705857
NFIX	-1.38585	-0.729887	0.524606	0.742594	0.848541
PIGP	-1.7193	0.403472	0.823494	0.448518	0.0438126
MED4	-1.58477	0.86063	0.748196	-0.318407	0.294351
ETFB	-1.51425	-0.173305	-0.0581989	0.599195	1.14656
FH	-1.61262	0.984542	0.35132	0.504728	-0.227975
ELF2	-1.62476	0.475244	0.355725	0.985416	-0.191627
SMIM10L1	-1.69638	0.229409	0.341619	0.962524	0.162827
EZR	-1.39821	-0.498084	0.0407742	0.735692	1.11983
SRSF9	-0.363809	0.536043	1.2289	0.0371779	-1.43831
UBAP2	-1.70093	0.893106	0.151274	0.140166	0.516388
INO80E	-1.71217	0.411225	0.0209997	0.839713	0.440233
DYNC1LI2	-1.59733	1.0317	-0.00445334	0.61792	-0.0478388
UHRF1	-1.51401	1.04847	0.183119	0.658455	-0.376034
PFDN1	-1.71891	0.0919314	0.815076	0.259378	0.552521
TCEAL8	-1.70702	0.611792	0.287934	0.0144039	0.792891
GATAD1	-1.48502	0.988515	0.600345	0.423345	-0.527188
MRPL46	-1.76444	0.532397	0.632374	0.408463	0.191207
Rps12-ps3	-1.68073	0.562364	0.254327	0.890788	-0.0267517
GAR1	-1.42035	0.746779	0.717451	-0.69619	0.65231
KRIT1	-0.994031	0.590697	-0.476871	1.45208	-0.571875
NDUFA6	-1.42107	-0.560755	1.14557	0.463462	0.372797
AKR7L	-1.64972	0.793817	0.80405	0.0110642	0.0407867
GRK6	-1.19161	0.753391	1.22445	-0.07366	-0.712573
ZRANB2	-1.64561	0.381372	-0.0824126	1.01464	0.332016
ZCCHC17	-1.65465	-0.0811353	0.852035	0.178163	0.705585
DDX27	-1.63008	0.934537	-0.052743	0.0686008	0.67969
CHCHD7	-1.56149	0.571537	0.899159	0.505016	-0.414226
PTPRF	-1.10365	1.32109	0.233942	0.437656	-0.889038
KDELR2	-1.42161	0.806937	0.220663	0.972106	-0.578097
SMARCAD1	-1.53915	0.541276	-0.167502	0.0210318	1.14435
ATF7IP	-1.6585	0.596063	0.182324	0.926646	-0.0465311
UBXN1	-1.30794	0.042856	-0.191828	-0.0427009	1.49961
PSAP	-1.65086	-0.0202261	0.566602	0.966541	0.137939
RAP1B	-1.39449	-0.117678	1.10702	0.808365	-0.403219
CLDND1	-1.52942	-0.34996	0.378015	1.11705	0.384318
KIF21A	-1.76933	0.463629	0.203968	0.496133	0.605604
NEUROG1	1.78789	-0.395004	-0.450684	-0.456325	-0.485875
DDB1	-0.261425	1.47742	0.366762	-0.366063	-1.2167
SOX12	-1.57113	0.861848	0.0748562	0.856615	-0.222187
ITGB3BP	-1.75728	0.187641	0.638686	0.332282	0.598675
PTPN11	-1.56897	1.10008	-0.0777873	-0.0204774	0.567156
RGMA	-1.35063	0.834444	0.504854	0.788149	-0.776817
MID1IP1	-1.52512	-0.0854183	0.918242	0.886472	-0.194174
COPB1	-1.61472	0.513931	0.281252	1.0071	-0.187563
ALKBH5	-1.57935	0.759821	0.397832	0.794437	-0.372745
PPIL2	-1.73116	0.225252	0.618146	0.147074	0.740687
SETBP1	-1.58232	0.0744405	0.0477645	1.18966	0.270449
ZNF326	-1.45451	0.0400872	-0.425706	0.854758	0.985372
CLPP	-1.50305	0.232237	0.396751	-0.32044	1.1945
UBXN4	-0.696758	1.33467	0.306044	0.300685	-1.24464
SPPL3	-1.21675	0.765796	1.26538	-0.396531	-0.4179
USP39	-1.62158	0.597522	0.148723	-0.113799	0.989132
NREP	-1.39868	0.167105	-0.49062	0.478947	1.24325
CSNK1G3	-1.17365	1.23306	0.311521	0.498732	-0.869668
PIAS2	-1.71837	0.868031	0.409104	0.341079	0.100154
GOT1	-1.58461	1.17085	0.135002	-0.0353249	0.314088
ARHGAP11A	-1.24489	0.623162	-0.90226	0.553933	0.970054
POP7	-1.65468	0.74311	0.242965	-0.127915	0.796517
COPS7A	-1.72961	0.632386	0.6203	0.00389458	0.473027
GUK1	-1.6986	0.413788	0.183273	0.161393	0.940152
GRB2	-1.41087	0.276805	1.3761	-0.0507189	-0.191313
C6orf62	-1.61908	0.678506	0.0391225	0.955886	-0.0544352
2610318N02Rik	-0.807661	1.70096	-0.178724	-0.64639	-0.0681875
DNAJC7	-1.69051	0.554054	0.61786	-0.140058	0.658655
RPA3	-1.57589	-0.158116	0.00750972	0.887117	0.839375
PDCL	-1.60945	0.58258	0.611977	0.759575	-0.344684
SALL1	-1.4309	1.2619	0.362724	0.227024	-0.420743
Mapk1ip1l	-1.52962	0.92284	0.100719	0.832012	-0.325953
RANGRF	-1.74358	0.319039	0.585937	0.133655	0.70495
SAFB2	-1.58612	0.772007	-0.341113	0.348924	0.806302
TMED7	-0.230863	0.973515	1.10439	-0.7318	-1.11524
CTPS1	-1.17733	1.34169	-0.117989	-0.655148	0.608782
MRPL32	-1.60643	0.303851	1.0987	-0.120693	0.324575
FLRT3	-0.9421	1.66087	0.107991	-0.429623	-0.397138
ZNF512	-1.65818	0.254682	-0.0436768	0.462315	0.984857
CCDC90B	-1.77239	0.315616	0.533072	0.617128	0.306578
BLOC1S2	-1.77298	0.587959	0.349225	0.277146	0.558647
CCDC59	-1.70632	0.483048	0.856487	0.348166	0.0186196
MRPL4	-0.685647	1.7062	-0.190925	-0.759913	-0.0697118
RSRP1	-1.20492	-0.267613	1.48521	0.361498	-0.374175
IMMT	-1.43675	0.457226	0.132613	-0.398278	1.24519
C20orf27	-1.65264	0.797503	0.0620005	9.51252e-05	0.793043
MRPS28	-1.71484	0.150961	0.206328	0.488364	0.869183
GLTP	-1.48574	1.17374	0.594792	-0.244235	-0.0385553
DDTL	-1.68086	0.502273	0.649313	0.689353	-0.160083
NKIRAS2	-1.71204	0.741918	0.2602	0.0396817	0.670235
AGO2	-1.35446	1.43381	-0.276495	0.0156199	0.181524
FLYWCH1	-1.71066	0.666585	-0.0399823	0.400369	0.683684
MRPL55	-1.74116	0.576441	0.509949	0.0430728	0.611697
BOD1L1	-0.490743	1.09965	-0.318818	0.951824	-1.24191
UBL4A	-1.77571	0.495848	0.526681	0.51795	0.235229
CD2BP2	-1.70724	0.767465	0.298403	0.00320373	0.638172
Gas2l3	-1.48441	-0.0889144	0.129238	1.32588	0.118204
WDR82	-1.74679	0.791793	0.209574	0.369603	0.375825
TXNDC15	-1.68168	0.523819	0.63477	0.684529	-0.161442
YPEL1	-1.73335	0.829983	0.314938	0.16324	0.42519
RAB10	-1.57876	-0.375548	0.831752	0.710644	0.411907
MIF	-1.74051	0.44102	0.734559	0.0862656	0.478662
ZNF664	-1.01651	1.41802	-0.893889	0.379743	0.112644
FIZ1	-1.2424	0.788769	0.319988	-0.861339	0.994982
NOLC1	-1.33757	1.16337	-0.248029	-0.383363	0.805594
Sept2	-1.55128	-0.19477	-0.0118693	0.950777	0.807142
D1Ertd622e	-1.55604	0.649215	0.866919	0.469904	-0.429996
Impad1	-1.53671	0.0187194	-0.237489	0.734685	1.02079
YRDC	-1.66568	0.929402	0.591218	0.101389	0.0436691
NRBP1	-1.69012	0.57782	0.718521	0.525375	-0.131593
MED29	-1.693	0.440939	0.824362	0.503917	-0.0762134
UBN1	-1.58867	1.05347	0.486762	0.277411	-0.228976
Rpl27-ps3	-1.28117	0.264461	-0.0288997	1.45586	-0.410256
RPP25L	-0.432324	1.24391	0.750642	-1.27205	-0.29018
RAB11A	-1.63612	-0.271425	0.610715	0.515004	0.781823
MAP4K4	-1.69619	0.363764	0.017373	0.406902	0.908152
CHRAC1	-1.66886	0.563508	0.878444	-0.110084	0.336998
TCF12	-1.17448	0.984263	-0.906451	0.210091	0.88658
ACTR10	-1.72654	0.638227	0.466302	-0.00587529	0.627889
SDE2	-1.72386	0.605499	-0.0236032	0.50354	0.63842
MSANTD3	-1.70865	0.678032	0.742735	0.0262783	0.261605
WDR1	-1.66011	0.50842	0.66188	0.707244	-0.217439
CALU	-1.60444	0.469673	0.411026	0.984094	-0.26035
LRRN1	-0.556676	1.754	-0.542231	-0.0984188	-0.556676
RAVER1	-1.71933	0.851238	0.165059	0.20163	0.501402
PRPF8	-1.61358	1.09208	0.063855	0.010982	0.44667
ITM2B	-1.3944	-0.668236	0.70239	0.988846	0.3714
CGGBP1	-0.702672	0.399481	-0.652352	1.58786	-0.632312
DNAJC2	-0.756162	1.70851	-0.0590119	-0.677644	-0.215694
C1orf52	-1.66675	0.15677	0.470185	0.986651	0.0531407
PPT1	-1.7197	0.87278	0.16929	0.232393	0.445234
Ppm1a	-0.949182	0.504489	1.50533	-0.440692	-0.619941
TXNDC9	-0.6066	0.673007	0.965848	0.409469	-1.44172
KDM5B	-0.0103324	1.59488	-0.581704	0.0531066	-1.05595
RAB5A	-1.49474	-0.485398	0.653936	0.329115	0.997088
CLK1	-1.75693	0.739076	0.299743	0.260887	0.457225
STX16	-1.76648	0.353692	0.710691	0.389017	0.313084
PITPNC1	-1.54631	0.643579	0.367734	0.944401	-0.409405
ZBED3	-1.69066	0.347385	0.0853547	0.962531	0.295386
UFC1	-1.64991	0.520767	0.826497	0.523952	-0.221307
UBL3	-0.606528	1.52885	0.410875	-0.322209	-1.01099
Trove2	-1.48346	0.40271	0.651108	0.963465	-0.533824
PDS5A	-1.54912	1.1519	-0.137175	0.503572	0.0308236
ZNF260	-1.62866	0.284691	0.230694	1.10139	0.0118886
LCMT1	-1.74056	0.539214	0.147724	0.300055	0.753563
TIMM9	-1.49271	1.0681	0.613637	0.249401	-0.438432
GCAT	-1.2773	1.42124	0.237201	0.140841	-0.521982
Sssca1	-1.66681	-0.195063	0.496987	0.631135	0.733746
DPM3	-1.56988	-0.415933	0.624444	0.529203	0.832164
MACF1	-1.59384	0.31772	-0.275339	0.576473	0.974985
CTDSP2	-1.40532	0.90413	0.395769	0.775704	-0.670284
ATP6V0D1	-1.66454	-0.150804	0.589155	0.381034	0.845153
MBTD1	-0.834924	1.43326	-0.0511374	0.466779	-1.01398
PSMD5	-1.76522	0.223441	0.6346	0.553221	0.353962
HTD2	-1.73116	0.371388	0.606058	0.0499034	0.703813
AASDHPPT	-1.60763	0.770585	0.742	0.412663	-0.317621
MED1	-1.49327	1.10921	-0.249241	0.688903	-0.0556108
DDX18	-1.78533	0.355915	0.474948	0.52648	0.427985
KPNA4	-0.169411	0.758219	0.381023	0.694267	-1.6641
ING1	-1.03322	1.21475	0.617051	0.216015	-1.01461
SLC24A5	-1.19567	0.00278229	-0.0568821	1.56992	-0.320148
CLASP1	-1.60515	0.602115	-0.350339	0.570834	0.782538
NUMA1	-1.68793	0.779949	-0.0360417	0.690762	0.253257
RWDD4	-1.68242	0.92262	0.132835	0.541587	0.0853736
DCAF7	-1.7178	0.333191	0.0311254	0.779739	0.573745
NME4	-1.67007	0.957536	0.489061	0.233868	-0.0103915
AURKB	-1.66806	0.580626	0.743787	-0.194367	0.538012
PHF6	-1.12573	0.203991	-0.420804	1.56928	-0.226728
LIG1	-0.822928	1.35664	-1.13184	0.193326	0.404801
DCPS	-1.6007	0.621165	0.504695	-0.347584	0.822423
OTX1	-1.45656	1.36395	0.122203	0.0218601	-0.0514529
MRPS6	-1.63269	0.550492	0.197392	-0.105713	0.990522
ARPC3	-0.907628	0.29926	0.034065	-0.921274	1.49558
IGSF9	-0.796597	1.65312	-0.408292	-0.651592	0.203364
DAP3	-1.30181	1.34953	-0.146213	-0.429197	0.527694
DNAJC24	-1.69707	0.114555	0.688175	0.105618	0.788724
HADH	-1.36537	1.20628	0.715657	-0.195795	-0.36077
ADD1	-1.74511	0.814839	0.30196	0.346111	0.282204
RNF146	-1.78371	0.383561	0.445416	0.569864	0.384867
Twistnb	-1.71156	0.583891	0.815706	0.244247	0.06772
KLC1	-0.9737	0.252569	-0.438495	-0.450593	1.61022
ISG20L2	-1.49757	1.17895	0.428905	0.242635	-0.352919
HMGXB4	-1.65565	0.477774	-0.220309	0.651346	0.746838
GPC6	-1.40404	1.39129	-0.226402	0.0385494	0.200607
PRKAR2A	-1.49344	1.19811	0.25694	0.384858	-0.346461
ATG12	-1.76438	0.581828	0.405101	0.591344	0.18611
PLK1	1.78592	-0.419563	-0.413464	-0.545414	-0.407477
NPDC1	-1.58511	0.0130976	0.171154	0.212196	1.18867
NCAPH	-1.71333	0.196134	0.101142	0.626869	0.78919
VAMP3	-1.70407	-0.0616711	0.40091	0.693449	0.671379
PPIL4	-1.76947	0.632588	0.222061	0.480141	0.434684
DTX3	-1.51826	0.279654	-0.0647507	0.0339733	1.26938
CHMP1A	-1.71458	0.361012	-0.000603381	0.596549	0.757627
DHRS4	-1.76072	0.665554	0.259451	0.275739	0.559973
SLC35A4	-1.7183	0.299696	0.368502	0.157309	0.892794
TIMM21	-1.74007	0.420865	0.755979	0.461769	0.101457
Sept11	-0.118938	0.884356	-0.936972	1.16075	-0.989196
Setd8	-0.225151	0.912245	1.17424	-0.985493	-0.875837
RAB1A	-1.43414	0.0164527	-0.347549	0.519198	1.24604
MRPL40	-1.58705	0.860586	-0.340416	0.700259	0.366623
PRKRA	-1.06732	1.20611	0.308884	0.554152	-1.00183
PPP1R35	-1.2119	0.442531	1.32088	0.192562	-0.744076
N4BP2L2	-1.70636	0.761046	0.227545	0.0428472	0.674924
NDUFC1	1.71721	-0.866452	-0.293681	-0.450358	-0.106716
PCDH19	-0.61506	1.77535	-0.377343	-0.49378	-0.289169
UBN2	-1.54793	1.0109	0.157236	-0.302619	0.682416
MYCBP2	-1.67066	0.59886	-0.184855	0.513243	0.743415
SUZ12	-1.50892	0.965789	-0.154287	-0.162859	0.860279
PAIP1	-1.22741	0.524523	0.450606	1.122	-0.869722
BCL11B	-0.959425	1.60076	-0.389937	-0.534008	0.282614
Gm10036	-1.25955	0.185734	-0.408663	1.48728	-0.0047947
RCC1	-0.981142	1.66464	0.0435752	-0.371055	-0.35602
1700020I14Rik	-1.55016	0.942164	0.566934	0.460464	-0.419404
PMPCB	-1.06507	0.746893	1.33661	-0.47284	-0.545596
RFC1	-1.25651	1.2867	-0.700171	0.175418	0.494564
SPCS2	1.77933	-0.568692	-0.312078	-0.380523	-0.518042
REST	-1.38463	1.02618	0.660663	0.372159	-0.674373
Ppp4r2	-1.55674	0.835564	-0.443626	0.622491	0.542309
TRAPPC5	-1.65306	1.06375	0.311948	0.14409	0.133271
Hist1h2ap	-1.02988	-0.137695	-0.0275027	-0.452587	1.64766
NPAS3	-1.61245	0.972308	0.097077	0.657365	-0.114299
CCND3	-1.36718	1.45583	0.0113655	0.00589568	-0.105913
RRS1	-1.77173	0.491049	0.599737	0.459458	0.221487
MTF2	-1.43684	1.38698	-0.0333589	0.101583	-0.0183685
SMIM11B	-1.38322	-0.430584	1.22298	0.635329	-0.0445035
DDX3X	-0.816831	0.184214	-0.863062	-0.0993451	1.59503
FRMD4A	-1.66969	0.935629	-0.0712046	0.34169	0.463577
DCLK1	-1.6262	0.426038	-0.233003	0.931845	0.501324
Dfna5	-1.30764	1.08392	0.0986191	0.803381	-0.678274
SMAD5	-1.65843	0.938194	0.00973368	0.597007	0.113498
Sgol2a	-1.47338	-0.302546	-0.0843455	0.940006	0.920266
CENPC	-1.38078	-0.358572	-0.187574	1.15474	0.772185
ELOVL6	-1.39323	0.955539	0.452146	0.678818	-0.693274
PABPC4	-1.16787	1.42344	0.293904	0.156851	-0.706324
LAP3	-1.56119	1.00475	0.718984	0.0260136	-0.188564
AMFR	-1.2552	0.675806	0.845833	0.64679	-0.913226
CSK	-1.63656	0.378221	0.603082	0.875463	-0.220211
U2SURP	-1.37293	1.05511	-0.409583	0.897323	-0.169923
Mir124-2hg	-0.564616	1.64686	-0.808934	-0.50904	0.235729
SH3GLB1	-0.764394	0.193164	1.00329	0.851314	-1.28338
CACFD1	-1.6474	1.08242	0.119633	0.244655	0.20069
NUP35	-1.74123	0.519629	0.586852	0.041479	0.593273
PTPN1	-1.62502	0.836006	-0.243965	0.332982	0.7
PABPN1	-1.72389	0.8616	0.209579	0.20614	0.446571
CDON	-1.56567	0.352863	0.034605	1.19279	-0.0145871
MRPL22	-1.72381	0.416223	0.757631	0.52994	0.0200143
ASAP1	-1.13195	1.57367	0.196305	-0.309234	-0.328793
UQCC3	-1.76948	0.573387	0.553331	0.438459	0.204304
MRPL23	-1.77375	0.607757	0.478421	0.245909	0.441667
UNC50	-1.53996	0.297786	0.153391	1.22395	-0.135166
MRPL35	-1.31597	0.827434	0.889963	-0.796945	0.395514
DDX42	-1.4143	1.1498	-0.203866	0.747248	-0.278889
POLR2K	-1.56083	-0.2833	1.03678	0.20028	0.607069
ABRACL	-1.57152	0.274467	0.14869	-0.0477181	1.19608
COPG1	-1.76541	0.25502	0.364581	0.693226	0.452579
CHD2	-1.54466	0.559383	-0.387392	1.00953	0.363139
ATP2B1	-1.67841	0.860272	0.124054	0.652501	0.041582
Kxd1	-1.63756	0.761348	0.707347	0.419204	-0.250337
CNOT1	-1.62359	0.978873	-0.149197	0.212075	0.581836
RPGRIP1	-1.42002	0.482937	-0.048766	1.28728	-0.30143
PIGY	-1.7245	0.170536	0.623521	0.169118	0.761329
HYAL2	-1.59648	1.15655	-0.0317058	0.209174	0.262466
FIBP	-1.71727	0.38802	0.162493	0.272429	0.894324
ELP5	-0.928512	-0.180935	-0.191025	-0.404047	1.70452
CDKN1B	-1.50166	0.0952653	0.275995	1.27964	-0.149243
PIAS4	-1.70292	0.63164	-0.0302919	0.334658	0.766919
MPHOSPH6	-1.75576	0.351696	0.759305	0.390232	0.25453
OXA1L	-1.74449	0.650948	0.141236	0.648847	0.303456
RPL30	-1.65393	0.583257	0.40383	-0.185678	0.852517
FTO	-1.69965	0.55732	0.274185	0.0165965	0.851548
KIF3A	-1.68577	0.43001	0.404745	0.898447	-0.0474344
ERGIC1	-1.5694	1.21951	0.183056	0.117803	0.0490286
OPA3	-1.36869	0.422699	0.476268	1.13232	-0.662592
MSI2	-1.31857	0.952539	-0.76215	0.82561	0.302567
TMEM128	-1.73237	0.770142	0.070991	0.488059	0.403173
CSTB	-1.71031	0.123185	0.437179	0.252998	0.896951
AMMECR1L	-1.66212	0.913014	0.259487	0.573863	-0.0842401
SEPHS1	-0.230632	0.648699	-0.140697	1.17808	-1.45545
LDHA	1.74607	-0.0976814	-0.406248	-0.672135	-0.570003
PAIP2	1.77379	-0.62436	-0.268965	-0.396028	-0.484433
UBE2V2	-1.59908	-0.329855	0.835302	0.685332	0.408305
TRAM1	-1.36315	0.725668	0.106303	1.12082	-0.589638
Fam69b	-1.69344	0.760204	0.0930816	0.10964	0.730518
STAU1	-1.63757	0.619464	0.752954	0.54033	-0.275174
FRAT1	-1.30156	1.09354	0.455832	0.53625	-0.784068
GANAB	-1.66826	0.85448	-0.102837	0.290804	0.62581
Sept9	-1.45185	1.37351	0.0609241	-0.0206574	0.038069
TM9SF3	-0.66478	0.504395	1.04685	0.509356	-1.39582
Bmyc	-1.73027	0.737201	0.59616	0.0790598	0.317852
ELP4	-1.54906	0.435183	0.989252	0.523097	-0.398472
HPRT1	-1.71177	0.170602	0.635048	0.1162	0.789915
MRPL9	-1.69214	0.765438	-0.0256124	0.256326	0.69599
CDK6	-1.40811	-0.524181	0.379453	1.21961	0.333226
TRIP6	-1.42	0.877689	0.872674	0.280424	-0.610784
USP47	-1.33111	1.12478	-0.214307	0.853994	-0.433353
UBE2G2	-1.72713	0.0485444	0.341246	0.713353	0.623983
PRMT7	-1.67753	0.568212	0.369146	-0.105747	0.845918
ARL2	-1.77232	0.595479	0.543316	0.251901	0.381625
Rpsa	-1.67134	0.559252	0.219871	-0.0268984	0.919119
MRPS25	-1.48007	0.686319	0.859201	0.514077	-0.579523
IER2	-0.921634	0.241221	0.120728	-0.928711	1.4884
TOX3	-1.29371	-0.0695284	1.4953	-0.262051	0.129987
SMARCE1	1.78601	-0.381088	-0.490008	-0.513621	-0.401291
Usp9x	-1.6679	0.757128	-0.171805	0.662465	0.420111
PRKRIP1	-1.59608	0.0769631	-0.0811016	0.517557	1.08266
RBM26	-1.26871	1.24657	0.427055	0.332371	-0.737284
ZNF771	-1.65251	0.0160529	0.134952	0.502268	0.999235
NES	0.387023	1.20778	-0.375954	0.258719	-1.47757
BRI3BP	-1.61233	1.04873	-0.123314	0.500641	0.186276
WDR6	-1.64035	1.00075	0.0339775	0.551015	0.054603
BACH2	-1.18432	1.25497	0.470468	0.301581	-0.842697
CEP295	-1.56483	0.071582	-0.18206	1.07187	0.603435
CENPV	-1.23926	0.387984	1.33464	-0.69755	0.214182
DAXX	-1.66951	0.94696	0.545784	0.0529461	0.123817
GFER	-1.59204	1.09837	0.290245	-0.175826	0.379249
EWSR1	1.77647	-0.61579	-0.394679	-0.47185	-0.294156
SNX12	-1.55345	0.859194	0.448785	0.678182	-0.432712
C1orf174	-1.71908	0.648025	0.723992	0.0313637	0.315702
Fdx1l	-1.68064	0.826731	0.691273	0.06014	0.102492
NT5C3B	-1.71929	0.805595	0.351373	0.519361	0.0429659
LONP1	-1.69691	0.843144	-0.037306	0.370705	0.520369
COMMD1	-1.59323	-0.173865	0.986021	0.112958	0.66812
IDI1	-0.749313	0.59226	0.0248601	1.30674	-1.17455
RPL23A	-1.7239	0.139449	0.376369	0.341986	0.866094
RPF2	-1.70159	0.543846	0.661795	0.600025	-0.104079
SMCO4	-1.7024	0.385946	0.906838	0.357495	0.0521222
Cxadr	-1.17517	1.35726	-0.0984014	0.576067	-0.659761
TPX2	1.77849	-0.555775	-0.547949	-0.327784	-0.346982
ZNHIT1	-1.54401	-0.122593	0.0720426	0.394479	1.20008
MOCS2	-1.69147	-0.127391	0.714518	0.517599	0.586741
ZFP91	-0.497891	1.5988	0.352053	-0.635746	-0.817213
Rps12	-1.68584	0.679545	0.247182	-0.0369366	0.796051
TLK1	-1.36097	1.38817	0.279807	0.064803	-0.371814
LSM14B	-0.956987	0.459514	1.52971	-0.505259	-0.526982
GPATCH4	-1.45823	0.617627	0.273362	-0.508998	1.07624
Snhg12	-1.28139	1.43327	0.375294	-0.154094	-0.373074
ATAD3A	-1.56236	1.18516	0.353735	0.132186	-0.108718
EXOC4	-1.62641	0.894752	0.181398	0.7052	-0.154942
UBE2M	-1.2194	1.48439	-0.187808	-0.406964	0.329785
CENPP	-1.68203	0.441038	0.953664	0.256621	0.0307044
ALDH18A1	-1.17789	0.982791	0.461975	0.702524	-0.969403
Fhl1	0.046041	1.29162	0.504579	-0.486342	-1.3559
SMARCD3	-0.695848	0.740685	0.971999	0.359171	-1.37601
RSF1	-1.36571	1.13913	-0.229975	0.811417	-0.354858
NSUN2	-0.887324	1.71903	-0.300756	-0.151045	-0.379904
CCNH	-1.46728	0.840211	0.615097	0.62353	-0.61156
BTF3	-1.72178	0.58775	0.677148	-0.0236668	0.480549
2810417H13Rik	1.68429	-0.679377	-0.582721	-0.580509	0.158318
GLE1	-1.73772	0.333087	0.389165	0.189669	0.825802
TRIM2	-1.33597	-0.452853	0.132227	1.38529	0.271308
PLEKHO1	-1.75798	0.719061	0.493892	0.273094	0.271933
VASP	-1.26854	0.892008	0.661873	0.604439	-0.889783
FAM168A	-1.35315	0.54096	-0.240644	1.32146	-0.268627
LMO1	-1.30131	0.499346	1.3121	-0.575638	0.0654952
RAD23A	-1.14614	0.102184	-0.861187	0.708137	1.19701
SNRNP48	-1.64308	1.05715	0.372377	0.00369288	0.209855
PLK4	-0.941099	0.448104	0.164162	1.35448	-1.02565
CBFB	-1.60072	0.0571653	0.922437	0.752518	-0.131405
ZMYND11	-1.39731	0.482909	0.230166	1.21597	-0.531736
PGP	-1.71095	0.170585	0.769366	0.663351	0.10765
SRSF1	1.78112	-0.336282	-0.3721	-0.518031	-0.55471
B9D1	-1.55469	0.475761	0.972583	0.50319	-0.396848
BIRC6	-1.42709	0.585129	0.0509956	1.20345	-0.41249
PLGRKT	-1.64925	0.659329	0.860418	0.284473	-0.15497
NIFK	-1.72942	0.625277	0.157336	0.204019	0.742793
PSMB6	1.71473	-0.652863	-0.33596	-0.721516	-0.00439084
AKT1	-0.460198	0.203332	1.65318	-0.837853	-0.558459
CKS2	-1.7074	0.0602469	0.418675	0.339217	0.889264
TCP1	1.75949	-0.394967	-0.511714	-0.674104	-0.178703
SUPT5H	-1.75065	0.735303	0.237988	0.522407	0.254953
KRR1	-1.59134	0.28825	0.117243	0.0151372	1.17071
TRMT1	-1.48578	1.07205	-0.118635	-0.227468	0.759831
TOX4	-1.73748	0.751025	0.372861	0.518744	0.0948522
PSME2	-1.63205	0.304335	0.800326	0.745457	-0.218064
SREK1IP1	-1.71773	0.409983	0.82142	0.453316	0.0330114
RTN1	-1.34556	-0.730421	0.340435	0.7374	0.998147
GTF2F1	-1.57675	0.169624	0.0145923	0.188688	1.20385
LHX2	1.48138	0.081373	0.165027	-0.490377	-1.23741
TUBG1	-0.848342	-0.225025	-0.405889	-0.253054	1.73231
EIF5AL1	-1.74314	0.37774	0.498687	0.121518	0.745196
YWHAQ	1.75063	-0.69539	-0.438318	-0.494627	-0.122293
NVL	-1.71176	0.653615	-0.071073	0.568633	0.560588
VRK3	-1.76691	0.228847	0.387242	0.493217	0.657603
Gja1	-1.433	1.38661	0.0955896	0.0575158	-0.106715
THOP1	-1.6988	0.961695	0.255594	0.303834	0.177679
CHAF1A	-1.4799	0.95888	-0.447966	0.152589	0.816393
Sepw1	-1.6401	0.0647589	0.534085	0.0314858	1.00977
RPL27	-1.68582	0.0780329	0.270465	0.972434	0.364887
RPL15	-1.68263	-0.163766	0.569007	0.672726	0.604661
MARCKSL1	1.4802	-1.16199	-0.111675	-0.564246	0.357709
GOLIM4	-1.74164	0.434928	0.0692608	0.678165	0.55929
TRIAP1	-1.50367	0.535301	0.0412879	-0.250948	1.17803
SUCLG2	-1.48771	1.18211	0.465263	0.203112	-0.362768
ZC3H18	-1.46226	1.17535	0.0204704	0.60463	-0.338188
TMED1	-1.70326	-0.0422578	0.40048	0.799343	0.545696
SPARC	-1.09037	1.23703	0.532329	0.279768	-0.958752
COX7C	1.59095	-1.0232	-0.231497	-0.56298	0.226732
TXNRD1	-0.0385886	0.930458	0.273409	0.508019	-1.6733
MRPS11	-1.403	0.979182	0.744502	-0.643612	0.322926
DHX30	-1.61568	0.877268	0.686964	-0.245155	0.296599
Snrpf	-1.64016	-0.198152	0.588438	0.357308	0.892568
DCTN1	-1.28359	0.80899	0.32793	0.962052	-0.815383
LEPROTL1	-1.78107	0.528973	0.305791	0.531165	0.415139
ESCO2	-1.69009	0.0094935	0.340364	0.415586	0.924641
NOL12	-1.69719	0.660541	0.575731	-0.119916	0.580838
WDR33	-1.53626	1.24409	0.0771063	-0.0700339	0.285096
VEZF1	-0.580368	1.54168	-0.530971	0.460067	-0.890403
MARCKS	-1.53567	0.331758	-0.216205	0.221929	1.19819
Ormdl1	-1.64964	1.07347	0.0966977	0.207775	0.271702
KIAA1217	-1.36194	0.882911	0.520584	0.71872	-0.760271
ARMCX2	-1.33682	1.11679	0.3662	0.567588	-0.713759
ATRAID	-1.57822	0.246734	1.10938	-0.199568	0.421669
CD164	-1.75161	0.220264	0.343201	0.421265	0.766878
KEAP1	-1.71972	0.693617	0.365889	0.653875	0.00633667
HMOX2	-1.58199	0.319	0.490449	-0.268178	1.04072
MRPL39	-1.64719	0.522873	0.389289	0.911431	-0.176402
RPL6	1.51768	-0.952645	-0.280769	-0.720876	0.436613
AIF1L	-1.48363	1.16361	0.628511	-0.187724	-0.120776
CHIC2	-1.61997	-0.144009	0.797344	0.838301	0.12833
CALM3	-1.54337	-0.344355	0.692157	0.206856	0.988713
Slc25a3	-1.16064	1.42715	0.00607758	-0.674331	0.401743
ATXN7L3B	-1.73121	0.0836449	0.485166	0.375117	0.787283
Rps27	1.46319	-1.19937	-0.407132	-0.278032	0.42135
HINT2	-1.55944	0.269928	1.22059	0.0736427	-0.00471229
ZMYM4	-1.54082	0.821288	-0.00627383	-0.223586	0.949389
TIMM44	-1.67302	0.115899	0.372624	0.175577	1.00892
RDM1	-1.51539	-0.497575	0.70933	0.42476	0.878879
JMJD6	-1.73557	0.843522	0.359591	0.317244	0.215213
TRABD	-1.52408	0.950233	0.665789	0.358216	-0.450157
LSM5	-1.66695	-0.144147	0.77706	0.340866	0.693171
NDUFA2	-1.50329	-0.459066	0.511145	0.397651	1.05356
RPS6	1.54513	-0.749145	-0.127639	-0.971249	0.302909
MCM3	-1.07795	1.63081	-0.312078	0.0410146	-0.281797
TOPORS	-1.55453	0.116468	-0.243584	0.62107	1.06057
MT-CO1	1.09931	-1.14392	-0.185638	-0.728087	0.958328
PTGES3	-1.61308	1.06682	-0.122587	0.231525	0.437322
PARK7	-1.48199	-0.365593	0.779571	0.0380209	1.02999
Atp5l	-1.58098	-0.353518	0.851026	0.362371	0.721097
ZNF281	-1.74438	0.324151	0.568523	0.71408	0.137625
RRAGC	-1.17358	0.699457	1.18788	0.126703	-0.840461
TXLNA	-1.56874	0.88124	0.162537	0.809413	-0.284453
EXOC5	-1.60047	0.459242	-0.324492	0.88797	0.577753
PSME1	-1.74759	0.419704	0.202104	0.344693	0.781093
JARID2	-1.33323	1.38845	-0.460671	0.214391	0.191058
LITAF	-1.52562	0.221794	1.27048	0.0823346	-0.0489921
SF3B2	-1.7019	0.66353	-0.0939704	0.484481	0.647857
CAPNS1	-1.07206	0.415305	1.51518	-0.345572	-0.512849
EED	-1.27349	1.10256	0.450064	-0.818201	0.539065
FDFT1	-1.59855	0.124963	0.0782312	0.223658	1.1717
TDP2	-1.54486	-0.218543	1.02139	0.0194818	0.722528
RPL37A	1.16541	-1.29027	-0.24975	-0.462497	0.837102
C1orf21	-1.66955	0.686649	0.148074	0.847956	-0.0131333
1500011K16Rik	-1.65595	0.554484	0.661565	0.675991	-0.236087
TMEM230	-1.69636	0.234104	0.846956	0.0239968	0.591305
Gt(ROSA)26Sor	-1.67635	0.158522	0.345165	1.00942	0.163245
CBL	-1.25745	0.579455	-0.0569714	1.31872	-0.583759
CUEDC1	-1.29565	1.44119	-0.0216474	-0.405544	0.281655
NUP50	-1.60444	1.10905	0.368642	0.224359	-0.0976079
CCNT1	-1.43492	1.13813	0.620176	0.161383	-0.484763
ELP2	-1.78369	0.48195	0.479128	0.315711	0.506898
BAD	-1.70396	-0.0148581	0.761764	0.308173	0.648881
TCF4	-1.50102	-0.510649	0.458061	0.963229	0.590379
METTL23	-1.22383	0.983223	0.466925	0.690546	-0.916868
Hspe1	-1.62147	0.56721	0.789568	-0.309606	0.574302
TONSL	-1.63763	-0.222453	0.417249	0.885251	0.557587
PAPSS1	-1.72262	0.0434187	0.347876	0.557372	0.773956
CENPT	-1.71495	0.0188543	0.684363	0.307827	0.703906
GMFB	-1.49365	0.679123	-0.289399	1.10636	-0.00243477
MRPS22	-1.63297	0.916864	0.30208	-0.19036	0.604386
MGAT2	-1.77554	0.443753	0.50861	0.574458	0.248718
9130401M01Rik	-1.67593	0.859741	0.198588	0.641926	-0.0243228
GALNT1	-1.31961	1.42511	-0.096177	0.325795	-0.335122
FGFBP3	-1.3238	-0.0492196	0.850364	1.09362	-0.570962
EI24	-0.975502	1.42636	0.401	0.0691868	-0.921041
IDH3B	-0.682509	1.37619	-0.714003	-0.741596	0.761918
CUL5	-1.04209	0.860778	-1.00719	1.06986	0.118636
SMC2	-1.60163	-0.254958	0.249434	0.713901	0.893254
CREB1	-1.68208	0.372826	-0.0094452	0.374729	0.943973
DOCK7	-1.71787	0.867473	0.162564	0.473224	0.214607
Zfp157	-1.62812	0.976756	-0.133465	0.206134	0.578691
NDUFAF3	-1.61922	0.118368	0.513684	-0.0600367	1.04721
DBI	-1.38437	-0.731634	0.887603	0.559776	0.668621
FAM114A2	-1.60713	0.508393	0.306828	-0.216813	1.00872
FBXW7	-1.61483	0.132714	0.238509	0.100003	1.1436
NCAN	-1.59238	-0.224487	0.440535	1.05744	0.318893
MAPK6	-1.5788	0.717883	-0.276417	0.202011	0.935321
Fam58b	-1.7354	0.410389	0.837262	0.243244	0.244508
OAT	-1.0198	-0.497115	1.02279	1.1259	-0.631776
FKBP1A	-1.5944	0.0639321	0.677028	-0.135086	0.988526
CHCHD3	-1.41337	1.12938	0.716448	-0.461276	0.0288161
Hn1l	-0.271752	1.72438	-0.280693	-0.280051	-0.891881
CRCP	-1.63464	0.507899	0.897649	-0.230399	0.459491
Pddc1	-1.72864	0.571833	-0.00320411	0.50262	0.657393
Mt3	-1.22883	-0.731416	0.747954	1.18093	0.0313662
FAM171A2	-1.05518	1.03934	1.03553	-0.182601	-0.837083
TBL3	-1.72849	0.834276	0.230546	0.185344	0.478326
FXN	-1.67544	-0.124871	0.590759	0.384792	0.824764
ATP5F1E	-1.44129	-0.523896	0.394244	0.425724	1.14522
TRA2B	-1.77717	0.266406	0.432941	0.573629	0.504192
TOPBP1	0.15811	1.2738	0.0558555	0.044339	-1.53211
UXT	-1.6937	0.536784	0.58316	-0.124577	0.698328
TNRC18	-1.53775	0.639197	-0.265785	1.07118	0.0931587
CFAP36	-1.60404	-0.197298	0.276674	0.48912	1.03554
MPRIP	-1.53696	0.487867	-0.13743	0.0114917	1.17504
CYHR1	-1.70746	0.0304993	0.286134	0.82694	0.563883
HTATSF1	-1.09428	1.60534	0.125816	-0.260042	-0.376832
ACAT1	-1.44474	-0.653781	0.62177	0.673942	0.802809
GON4L	-1.14119	1.14731	-0.916266	0.202463	0.707686
HES6	1.73297	-0.634404	-0.529182	-0.56058	-0.00879995
SOX3	-0.91333	0.597507	1.39536	-0.166203	-0.91333
GRIA2	-1.49633	0.121088	0.158315	1.30875	-0.0918219
SNX27	-1.69932	0.455932	0.00761761	0.883224	0.352548
PAIP2B	-1.33301	0.0112494	0.0607407	1.47436	-0.213341
Ifitm2	-1.25419	1.13838	0.511197	0.431433	-0.82682
TMOD3	-1.51236	0.516054	0.567078	0.933208	-0.503978
TARS1	-1.6663	0.758942	0.744153	0.282048	-0.118839
SDF2L1	-1.54439	1.25736	0.0329237	0.143252	0.110856
MYDGF	-0.689976	1.28974	0.876744	-0.768072	-0.708438
Hn1	1.41421	-1.05692	-0.366087	-0.607517	0.616307
TMED5	-1.65497	0.00422609	0.765997	0.818475	0.0662744
TCF7L1	-0.836835	1.65215	0.0839184	-0.167896	-0.731342
TPGS1	-1.72208	-0.0104694	0.72118	0.543174	0.468192
RSPRY1	-1.74339	0.5651	0.239428	0.201863	0.737001
KDM6B	-1.56159	0.879764	-0.266584	0.839329	0.109085
MAFG	-1.25052	1.22478	0.729338	-0.0719111	-0.631683
ATP6V1A	-1.6073	0.317623	-0.177916	0.411979	1.05561
FUBP1	-1.66534	0.746729	0.529085	0.590518	-0.200993
MDM4	-1.70195	0.585803	0.230898	0.839519	0.045731
ATF2	-1.31064	0.891588	-0.0469428	1.06261	-0.596621
Rpl13-ps3	-1.41656	0.115168	0.817108	1.01518	-0.530893
ZEB1	-1.22574	-0.0362427	-0.376922	0.108403	1.5305
REEP5	-1.72417	0.114997	0.708272	0.681256	0.219648
HDHD2	-1.56746	-0.197416	0.827304	0.904765	0.032804
KIF18A	-1.48932	0.125273	0.199666	1.30623	-0.141845
MRPL2	-1.7041	-0.0598882	0.754527	0.58729	0.422174
ORC2	-1.70508	0.883172	0.117819	0.511672	0.192416
BLOC1S6	-1.39261	1.40241	0.243124	-0.0892845	-0.163641
ACTN1	-1.29127	0.549321	0.458718	1.0851	-0.801868
ADSL	-1.31046	1.16258	0.658348	0.173365	-0.683836
ZBTB20	-1.24752	-0.8012	0.20987	0.736331	1.10252
PSPC1	-1.38233	0.870887	0.172713	0.957881	-0.619148
Nnat	-0.845641	0.13771	-0.793364	-0.118132	1.61943
SLBP	-0.974094	0.457436	0.0695442	-0.946293	1.39341
DPM2	-1.77666	0.430269	0.393585	0.319078	0.633732
ALDH2	-1.73731	0.805513	0.300156	0.168644	0.462998
GPX8	-1.30602	0.430131	1.07096	0.589235	-0.784305
NUBP1	-1.63381	0.580872	0.796117	0.532432	-0.27561
NTMT1	-1.62119	0.0848767	0.435041	0.0172996	1.08397
PITPNB	-1.46929	0.83623	-0.439033	0.968754	0.103337
ANAPC1	-1.63328	0.775708	-0.169003	0.217348	0.809232
PGD	-1.50881	1.21214	-0.124806	0.484442	-0.0629681
LRWD1	-1.55897	1.06086	0.51665	0.288291	-0.306824
WASF1	-1.46599	0.964802	-0.127241	-0.280092	0.908516
CHST2	-0.659499	1.73763	-0.101792	-0.316845	-0.659499
Acaa1a	-1.78094	0.474923	0.530129	0.489542	0.28635
ALDOC	-1.16656	-0.49645	1.30655	0.735936	-0.37947
CCDC86	-1.67708	0.288689	0.648389	-0.0826727	0.82268
NDUFAF4	-0.733387	0.686728	0.88442	0.544817	-1.38258
Psma1	-1.6581	0.802963	0.768162	-0.0343343	0.121305
EHMT2	-1.23834	1.53687	-0.311439	0.0675433	-0.054644
DHX36	-1.59996	0.89931	0.316502	0.670311	-0.286166
CLSTN1	-1.57646	0.791804	0.92123	0.0538306	-0.190403
INO80B	-1.61565	0.293287	0.289351	1.10234	-0.0693284
CEP164	-1.5595	1.2102	-0.0617769	0.29238	0.118699
C1orf35	-1.47052	1.03548	0.82686	-0.146482	-0.245337
ACOT13	-1.67659	0.446258	0.95754	0.270196	0.00259615
COMMD10	-1.62197	1.01288	-0.0153545	0.040129	0.584314
BTG2	-0.970728	-0.368317	-0.246132	-0.10325	1.68843
NSG1	-1.05606	-0.151045	-0.048373	-0.389975	1.64545
PATZ1	-0.0605722	1.64359	-0.37345	-0.144375	-1.06519
ATP6V0E1	-1.36928	-0.56	0.662788	0.0992948	1.16719
5430416N02Rik	-1.5777	1.01846	0.654531	0.0949163	-0.190202
NUDT19	-1.70785	0.558518	0.200227	0.0998544	0.849254
CLCN3	-1.2378	1.08432	0.48068	0.546165	-0.87336
NME6	-1.63239	0.711639	0.822059	0.321581	-0.222889
CLPTM1L	-1.42352	1.13398	0.468208	0.386313	-0.564982
RFK	-1.74883	0.763594	0.460842	0.328024	0.196364
MPND	-0.446781	0.380583	0.628423	0.964395	-1.52662
CYB5R3	-0.0260812	1.22477	-0.816704	-1.12889	0.746908
KIFAP3	-1.64125	0.0345343	0.139126	0.410642	1.05694
FNBP4	-1.67586	0.956798	-0.0202441	0.403834	0.335471
AHCYL1	-1.78187	0.467472	0.36292	0.580766	0.370707
MIER1	-1.49897	0.808292	-0.0128698	1.0045	-0.300952
RBPJ	-1.69878	0.394394	0.279185	0.93398	0.0912253
ARFIP2	-1.69605	0.873372	0.138006	0.110811	0.573859
MNAT1	-1.6476	0.8242	0.490694	0.560035	-0.227327
Fcf1	-1.48022	0.121279	1.10991	0.639932	-0.390902
ARF6	-0.240751	0.673537	1.13492	-0.0868945	-1.48081
GIGYF2	-1.62895	0.583755	0.22142	0.967508	-0.143734
0610037L13Rik	-1.59665	-0.157819	0.416369	0.246437	1.09166
ATP6V0E2	-1.61629	0.0769868	0.424545	0.0188136	1.09594
N6amt2	-1.74034	0.233294	0.793549	0.229198	0.484297
C6orf226	-1.6708	0.149797	1.02835	0.186584	0.306062
BCAS2	-1.6685	0.173297	0.688444	-0.0363382	0.843095
SPAG9	-1.07039	0.181422	-0.423064	1.59985	-0.287814
RRP15	-1.74732	0.528489	0.741909	0.279747	0.197177
MAGT1	-1.59511	0.615201	0.425845	0.886254	-0.332185
GNAO1	-1.53518	0.253189	0.397415	1.15991	-0.275332
DACH1	-0.765479	1.67844	-0.0794367	-0.0680407	-0.765479
PBX2	-1.19245	1.56242	-0.322178	-0.150366	0.102573
TOMM70	-1.33223	1.20333	-0.581636	0.66057	0.0499664
VAPA	-1.47497	-0.598948	0.555339	0.713087	0.805495
RPL18A	1.14524	-0.948848	-0.0673323	-1.00667	0.877614
GPBP1	-1.12814	-0.382688	0.764785	1.29975	-0.553705
TADA1	-1.7234	0.220768	0.615272	0.120514	0.766849
NCKAP1	-1.71135	0.50953	0.211509	0.867014	0.123299
QSER1	-1.61928	0.238682	0.0707797	1.13352	0.176294
HM13	-1.62278	0.874052	0.546433	0.477693	-0.275398
Nedd1	-1.46285	1.24552	0.0438981	0.468674	-0.295235
Wdr83	-1.56595	0.26375	0.0673687	0.0210458	1.21378
Cbx5	-0.218451	1.20847	-1.36111	0.719593	-0.348501
SKA3	-1.02908	0.828475	-0.00587662	-0.953465	1.15995
APOO	-1.5543	0.180362	1.02942	-0.292806	0.637323
NFU1	-1.71803	0.236685	0.528772	0.11637	0.836198
DLAT	-1.63916	0.920292	0.662336	0.142132	-0.0856004
TAOK1	-1.64579	0.804879	0.264596	0.739519	-0.1632
CD320	-1.67932	0.938087	0.240219	0.492031	0.00898302
PSMB3	-1.43803	-0.210598	0.648713	-0.195376	1.19529
RSRC1	-1.58746	-0.125259	0.076411	0.573541	1.06277
LZIC	-1.77891	0.412781	0.361874	0.62435	0.379904
IRAK1BP1	-1.74272	0.163203	0.391901	0.790652	0.396964
PNO1	-1.54777	1.03236	0.719341	-0.116114	-0.0878185
MED31	-1.75594	0.16499	0.359488	0.647092	0.58437
ARMC1	1.66988	-0.815448	-0.69918	-0.228712	0.0734647
WBP4	0.593735	-0.973856	-0.626697	-0.445141	1.45196
AKIRIN1	-1.73704	0.262054	0.770174	0.162069	0.542746
DBNL	-1.26827	1.31823	0.369559	-0.673008	0.253485
DNPH1	-1.33137	0.640576	0.293243	-0.710092	1.10765
THOC7	-1.75078	0.161734	0.699376	0.335864	0.553802
TAF3	-1.66264	0.6092	-0.0918767	0.256302	0.88902
C11orf96	-1.10316	0.326778	1.48176	-0.0122191	-0.693159
TTC28	-1.51593	-0.151156	0.0985549	1.25292	0.315609
AMZ2	-1.71533	0.087733	0.669384	0.211893	0.746316
ATF1	-1.67704	0.333578	0.0948137	1.0036	0.24505
PSMG1	-1.64123	0.853385	0.565251	0.453219	-0.230627
Wrb	-1.65603	0.420764	0.124713	1.02872	0.0818386
NSMCE2	0.623776	-0.896707	0.0684091	-1.07698	1.2815
PPIG	-1.22788	1.29377	-0.35318	-0.427528	0.71482
HSP90B1	-1.60977	0.304609	0.364406	1.07888	-0.138134
MAPK8IP1	-0.631403	1.70365	-0.0782065	-0.812245	-0.181796
CHCHD6	-1.37567	-0.299856	0.00344813	0.279403	1.39267
MPLKIP	-1.74833	0.455749	0.498667	0.690046	0.103871
CRLS1	-1.0141	0.313458	1.57169	-0.544572	-0.326467
PLA2G12A	-1.06957	1.2703	0.623237	0.0952049	-0.919166
TRMT10C	-1.70142	0.388473	0.435338	0.874479	0.00313515
RPL29	-1.61017	0.0599836	1.02122	0.596874	-0.0679154
ACIN1	-1.27818	1.09828	-0.0227254	-0.653337	0.85596
ACSL3	-1.48739	0.415888	0.361672	1.13976	-0.429929
RAP2B	-1.66538	0.742152	0.285294	0.761041	-0.12311
DGUOK	-1.66882	0.128171	0.859487	0.678154	0.00300558
C12orf57	-1.47823	-0.400657	0.106995	0.694795	1.07709
MT2A	-1.38517	-0.184753	0.82574	1.1098	-0.365612
SIN3A	-1.61326	1.00648	0.0106216	-0.0232884	0.619453
ALCAM	-1.28975	0.831358	0.713931	0.614875	-0.870414
MAPKAP1	-1.3437	0.218569	0.6849	1.10914	-0.668907
YIPF5	-1.27591	0.327374	0.803856	0.969065	-0.824384
SMDT1	-1.22338	-0.573855	0.180164	0.162735	1.45434
PDE7A	-1.66842	0.812101	0.650622	0.339922	-0.134226
LYRM2	-1.70166	0.572546	0.162069	0.107559	0.859485
GNL2	-1.71112	0.567727	-0.00817057	0.367658	0.783907
FNDC4	-1.77021	0.689187	0.393466	0.333788	0.353767
PTPRZ1	-1.31599	-0.642363	0.105421	1.1792	0.673727
EME1	-1.47244	0.80582	-0.0117214	-0.350897	1.02923
DLST	-1.57151	0.9828	-0.16164	0.0168456	0.733509
MRPS18B	-1.4888	1.13069	0.626444	0.0614958	-0.329828
HNRNPH3	-1.48356	1.13985	-0.275224	0.650422	-0.0314958
ESF1	1.29533	-0.0681217	0.15995	0.121824	-1.50899
CAPN2	-1.2801	0.56184	0.841136	0.754228	-0.877106
SYMPK	-1.54678	1.04877	0.0467756	-0.223577	0.674812
SETD2	-1.64616	1.02967	0.00404142	0.451789	0.160659
SLC1A3	-1.43097	-0.602587	0.567541	1.04324	0.422776
PTEN	-1.57121	0.989865	0.716401	0.0531415	-0.188199
PLAA	-1.49425	1.20566	-0.340326	0.316134	0.312788
NSD1	-0.419788	1.11741	-0.87554	1.03574	-0.857818
NKAP	-1.72016	0.345221	0.0420212	0.792502	0.540415
APH1A	-1.76202	0.685173	0.20958	0.379622	0.487642
UBE2J1	-1.74868	0.638428	0.1861	0.271229	0.652928
DHCR24	-1.43586	1.06974	0.246472	0.662338	-0.542686
PGAM5	-1.63894	0.758416	-0.19644	0.293351	0.78361
FTSJ3	-1.67099	0.915845	-0.0792181	0.331616	0.502752
MLF2	-1.60002	0.336553	0.554944	-0.265305	0.973823
SOX5	-1.53914	0.911665	-0.231013	-0.00552105	0.86401
SNAPC2	-1.72239	0.752257	0.0798523	0.625145	0.265136
ETAA1	-1.77243	0.319018	0.548053	0.605161	0.300202
GOLPH3	-1.74894	0.649098	0.234238	0.22023	0.645376
CDKN2D	-1.37059	-0.614837	0.639161	0.210134	1.13613
RASA1	-1.57093	0.474317	-0.315131	1.03097	0.380775
CEP55	-1.30189	-0.320941	-0.387808	0.882147	1.12849
LPAR1	-1.28621	0.503007	0.894161	0.746696	-0.857657
SPATA13	-1.69433	0.869636	0.11321	0.587101	0.124385
RASSF1	-1.6916	0.638654	0.822538	-0.00205669	0.232464
CASC3	-1.61019	1.04051	0.187344	0.520144	-0.137803
CHURC1	-1.68707	0.0479053	0.144552	0.829941	0.664675
UBE2T	-1.21362	-0.485218	0.0572773	0.134836	1.50673
FGFR1	-0.735392	0.22799	0.451588	1.29316	-1.23735
SHISA4	-1.70636	-0.00852693	0.426464	0.448793	0.839629
DDX54	-1.51885	1.25111	0.0950056	0.31426	-0.141534
ADGRG1	-1.70872	0.618993	0.615228	0.558227	-0.0837319
ZMIZ2	-1.38236	0.242981	-0.401809	0.187082	1.3541
CSTF2T	-1.61205	0.760124	0.758758	0.395468	-0.302296
Gm2000	-1.04251	-0.233573	1.54117	-0.605977	0.340884
EGLN2	-1.32695	0.971832	0.574518	0.576089	-0.795493
CTDSPL2	-1.64761	0.29226	-0.119752	0.958544	0.516555
SNRNP200	-1.52114	1.19777	-0.163673	0.473833	0.0132091
OSER1	-1.57455	0.190559	1.21206	0.103478	0.0684536
TMEM222	-1.74265	0.258168	0.769274	0.514083	0.201125
WASL	-1.75055	0.579892	0.515445	0.571497	0.0837157
C2orf68	-1.61252	0.33596	0.0821532	0.0648177	1.12959
KCMF1	-1.60284	0.807182	0.701167	0.423587	-0.329099
EXOC3	-1.77108	0.32513	0.44874	0.670357	0.32685
DNM1L	-1.73721	0.277687	0.133324	0.725616	0.600583
SUMO2	1.10327	-1.21781	-0.323342	-0.522453	0.960332
WDR75	-1.67109	0.965109	0.0632569	0.140449	0.502279
CIR1	-1.67186	0.195869	0.86754	0.64244	-0.0339865
C11orf49	-1.68079	0.441264	0.851454	0.494014	-0.105946
PIP5K1A	-1.58387	0.803822	-0.34808	0.354642	0.773489
CELSR2	-1.37718	1.29122	0.0827818	0.464872	-0.461688
DDX47	-1.63666	0.453437	0.166933	-0.0263963	1.04268
MEX3B	-1.66082	0.739517	0.682952	0.435381	-0.197034
DDIT4	-1.64282	-0.152366	0.477535	0.357348	0.960305
Tarbp2	-1.71209	0.53235	0.600631	-0.0688655	0.64797
ATF6B	-1.7078	0.76758	0.651167	0.263751	0.0253065
RNF220	-0.302895	0.541295	1.39223	-0.398486	-1.23214
SP3	-1.48179	0.63915	-0.459917	1.06111	0.241448
SFRP2	-1.27923	0.451771	0.924078	0.758192	-0.854816
KMT2C	-1.697	0.16006	0.06084	0.764712	0.711391
YPEL3	-1.40104	-0.527919	0.41415	0.288601	1.22621
Nutf2	-1.31272	-0.0425963	-0.313581	1.46055	0.208348
EML4	-1.33914	1.09711	-0.328578	0.890403	-0.319793
TSPAN3	-1.39904	0.0241646	1.30256	-0.377871	0.450186
IFT20	-1.45359	-0.329078	1.23638	0.497768	0.0485185
FN1	-0.862012	1.72452	-0.174622	-0.433068	-0.254815
DMRTA1	-0.614283	1.77736	-0.461441	-0.30306	-0.398578
RABEP1	-1.60933	0.509782	-0.0801928	1.06308	0.116661
CCDC47	-1.53748	0.448749	0.922308	0.617191	-0.450764
TEN1-CDK3	-1.65858	0.161476	0.246194	0.189537	1.06137
LAS1L	-1.62486	0.49548	0.515875	0.881212	-0.267706
ANK2	-1.7211	0.707991	0.336617	0.650041	0.0264509
ADGRL2	-1.42309	0.904644	0.193446	0.892636	-0.567636
NT5C3A	-1.67989	-0.0261568	0.486649	0.295858	0.92354
CEP83	-1.69703	0.387936	0.132737	0.227567	0.948788
ZNF740	-1.34639	1.37658	0.412797	-0.112559	-0.330425
PTPN2	-1.54626	1.1742	0.466518	-0.111352	0.016892
RB1CC1	-1.26424	0.618059	0.447186	1.04816	-0.849163
Rqcd1	-1.47	1.20839	0.445509	0.193965	-0.377862
Mcts2	-1.59988	1.11615	0.439745	0.0105856	0.0333983
STMN3	-1.23246	-0.204256	-0.0735614	-0.0490481	1.55933
ZNF536	-1.43232	0.772797	0.581405	0.749751	-0.671637
UPF3A	-1.63988	0.0329384	0.729839	-0.00438164	0.881487
FNDC3A	-1.68277	0.542604	-0.102383	0.407492	0.83506
CLINT1	-1.35844	0.420745	1.24294	0.286777	-0.592018
CCDC43	-1.70858	0.655331	0.583922	-0.0817166	0.551045
DROSHA	-1.36181	1.33654	-0.0987156	0.475335	-0.351347
WDR46	-1.735	0.840162	0.404664	0.24233	0.247845
CHUK	-1.42334	0.319179	-0.026006	1.35023	-0.220063
NIPA2	-1.31603	0.98882	0.64301	0.485128	-0.800926
TPBG	-1.58757	0.726967	0.949156	0.107917	-0.19647
TAX1BP3	-1.59445	1.03067	-0.141742	0.604238	0.101279
SYPL1	-1.74097	0.185446	0.759771	0.255137	0.540622
SLC25A46	-1.62441	0.403	0.047925	1.09076	0.0827205
MRPS34	-1.59843	0.0959964	0.16128	0.165367	1.17578
API5	1.39269	0.354196	-0.186439	-0.19596	-1.36448
COMMD7	-1.65671	0.530315	0.945214	0.2698	-0.0886182
NUDT2	-1.46195	0.536883	1.07698	0.372952	-0.524871
C1orf122	-1.74794	0.202829	0.273048	0.735823	0.536245
FGFR3	-1.13315	1.43435	-0.111385	0.465539	-0.655353
PHKG2	-1.69145	0.886739	0.00853322	0.264502	0.531671
PPAN-P2RY11	-1.6059	1.06745	0.403889	-0.166675	0.301235
WSCD1	-1.60425	0.411811	-0.040287	0.118691	1.11404
DYNC1H1	-1.63488	-0.00900054	0.06227	0.981143	0.600469
CBX6	-1.52992	1.11106	-0.0251669	0.625547	-0.181523
PRKD3	-1.68922	0.40101	-0.107428	0.685807	0.70983
CACHD1	-1.1078	1.56297	0.256687	-0.282915	-0.428942
CDC40	-1.67755	0.447779	0.698395	0.687822	-0.156449
NOB1	-1.47423	0.517971	0.0190871	-0.279355	1.21653
RAB6B	-1.41896	1.35762	-0.225067	-0.0176344	0.304038
SEC23A	-1.34137	0.306649	0.505911	1.18932	-0.660507
SRRM1	-1.48459	0.497336	-0.573186	0.816305	0.744139
ATP6V1E1	-1.30326	0.155385	-0.523422	0.284848	1.38645
ABI2	-1.6859	0.809195	-0.0939035	0.377848	0.592759
BOK	-1.59607	0.930071	-0.0214663	-0.0750669	0.762527
GYG1	-1.40126	1.12833	0.647777	0.182349	-0.557195
SCAMP3	-1.53186	0.965054	0.134527	0.768659	-0.336384
LYPLA2	-1.48174	1.00405	0.0236357	-0.361483	0.81554
HEATR6	-1.70088	0.805863	0.21563	0.639953	0.0394339
KRT10	-1.56398	0.0324744	0.963235	0.765604	-0.197333
PTK2	-1.04489	1.49431	-0.0755089	0.360603	-0.734516
RAB11FIP2	-1.36348	1.07877	0.884087	-0.388926	-0.210452
Apitd1	-1.77635	0.277714	0.606286	0.416963	0.475391
2610524H06Rik	-1.41011	0.462484	1.12565	0.41831	-0.596338
ECD	-1.76764	0.432558	0.436706	0.232316	0.666065
SAP30BP	-1.75597	0.699309	0.543852	0.268468	0.244337
ATG101	-1.62583	-0.140039	0.899832	0.157019	0.70902
CPSF7	-1.24249	0.804783	1.04995	0.203158	-0.815394
UCK2	-1.31442	1.44203	-0.180671	0.308313	-0.255251
MRGBP	-1.68845	0.860031	0.596185	0.232512	-0.000283717
SLC35A1	-1.64013	0.701925	0.356214	0.801402	-0.219411
ARHGAP33	-1.73946	0.743523	0.0925835	0.500941	0.402413
HOMER3	-1.70069	0.958172	0.264924	0.290316	0.187283
DCAF11	-1.77458	0.613672	0.511108	0.293999	0.355804
AP2B1	-1.5492	0.199355	-0.180347	1.18756	0.34263
Acyp1	-1.75241	0.663074	0.380563	0.13828	0.570488
APLP2	-1.20938	0.257351	0.879318	0.957042	-0.884327
TAF6	-1.53568	0.483267	-0.0614921	-0.0691274	1.18303
ITCH	-1.46878	0.39496	-0.323848	0.148799	1.24887
Sept6	-1.36168	1.454	-0.125288	-0.0715095	0.104481
MTHFD2	-1.62783	0.433215	0.16318	-0.0338076	1.06524
ZNF511	-1.71396	0.817066	0.52702	0.0290544	0.340818
SALL2	-1.23217	1.51294	0.183215	-0.0714574	-0.392528
IFT46	-1.6946	0.0763047	0.254313	0.42939	0.934591
KANSL1	-1.56154	0.907122	0.253984	0.745213	-0.34478
ANKRD46	-1.69494	0.0723797	0.15705	0.840963	0.624547
ANKHD1	-1.30382	1.15736	0.0941459	0.715481	-0.663162
DDX50	-1.41229	0.75393	0.802934	0.55296	-0.69753
EHD1	-1.66518	0.369527	-0.0929291	0.451507	0.937079
YARS1	-1.65174	0.419359	0.417391	-0.135445	0.950436
BCL2L13	-1.26522	1.34662	0.591102	-0.407988	-0.264509
TM2D3	-1.62221	0.0662071	0.864248	-0.0887953	0.780547
SMIM19	-0.880451	1.10203	1.06755	-0.785509	-0.503625
FERMT2	-1.70116	0.389851	0.636187	0.738469	-0.0633501
PINX1	-1.57982	0.799942	0.359599	-0.358461	0.778744
MTIF2	-1.75849	0.566597	0.54014	0.122752	0.529005
Dnal4	-1.73066	0.37896	0.430633	0.10585	0.815212
FRA10AC1	-1.71857	0.504231	0.84725	0.124116	0.242972
PHIP	1.59763	-0.573565	-1.04533	-0.102663	0.123932
THBS3	-1.32464	0.636439	0.899981	0.603998	-0.815775
TSPAN5	-1.54598	1.16559	0.250859	0.364791	-0.235253
TRAPPC2L	-1.71352	-0.0265064	0.635097	0.395378	0.709553
HAUS4	-1.65549	0.632933	0.924049	0.0524211	0.0460904
TMEM251	-1.50332	1.00985	0.772609	0.0657792	-0.344923
TROAP	-1.58008	-0.141515	0.392406	0.192392	1.1368
PIGF	-1.65548	0.535565	0.4417	0.8623	-0.184081
FADS1	-1.33874	1.13798	0.411787	0.494878	-0.705901
IGFBP4	0.0317821	1.7215	-0.643296	-0.502242	-0.607744
TRPC4AP	-1.69019	0.289527	0.0149618	0.470233	0.915469
PON2	-1.73238	0.293563	0.837506	0.177197	0.424112
ERCC1	-1.67382	0.0408482	0.901048	0.607746	0.124176
COPRS	-1.64761	0.0628204	0.158482	0.367346	1.05896
DMRT3	-0.537092	1.77156	-0.204706	-0.492672	-0.537092
SNRPN	-1.18825	-0.483788	-0.159053	0.344453	1.48663
MAK16	-1.03663	1.00338	0.325186	-1.08678	0.794853
FIGNL1	-1.11963	0.417849	0.289905	1.30206	-0.890178
TLN1	-1.73952	0.0919277	0.425814	0.74859	0.473191
ARL6IP5	-1.49848	0.49419	1.21908	-0.0838252	-0.130959
Dgcr14	-1.76214	0.664834	0.543603	0.32201	0.231689
GNG3	-1.45547	0.249317	-0.461476	0.505192	1.16244
Rpl14	1.3895	-0.573957	-0.367301	-1.09144	0.643202
NARS1	1.51442	-0.539782	0.0254037	0.176171	-1.17621
PPIA	1.16266	-0.753205	-0.451972	-0.947174	0.989694
RPS14	1.45931	-0.78213	-0.242014	-0.96103	0.525863
RAB22A	-1.58082	0.266401	0.667695	0.945892	-0.299163
IGF1R	-1.34146	0.691786	0.0685374	1.17044	-0.589306
PDCD2	-1.73377	0.848283	0.214319	0.376067	0.295104
YIF1A	-1.76404	0.447762	0.593748	0.168777	0.553754
UBXN6	-1.06633	-0.22457	-0.20302	-0.162821	1.65674
SURF4	-1.74949	0.785466	0.230788	0.377854	0.35538
FAM50A	-1.68562	0.987224	0.335271	0.127943	0.235179
GATC	-1.55348	1.23555	0.133607	-0.0202212	0.204543
PCF11	-1.72358	0.192938	0.352709	0.883822	0.294111
Whsc1l1	-1.50894	0.428771	0.173347	1.19437	-0.287543
PIF1	-1.57079	0.564798	0.503284	0.897101	-0.394396
SH3BP1	-1.16499	1.16018	0.812759	-0.0103933	-0.79756
Fam173a	-1.74666	0.248876	0.51173	0.2292	0.756857
SMIM12	-1.78246	0.552782	0.350019	0.502501	0.377158
HOMER2	-1.51588	1.09079	0.68938	-0.164659	-0.0996355
TDP1	-1.51059	0.0317111	1.03402	0.746342	-0.301489
YY1	-0.911628	0.420979	1.54695	-0.385396	-0.670908
RNPEP	-1.5644	0.203798	0.369886	-0.169305	1.16002
KIN	-1.66929	0.840169	0.621214	0.327628	-0.119719
PKP4	-1.65143	0.661756	0.284986	0.855009	-0.15032
ITGA6	-1.21788	1.20451	0.396693	0.454518	-0.837845
ZNHIT6	-1.61427	0.641256	0.669759	-0.342518	0.645773
WRAP73	-1.65586	0.44079	0.211425	-0.00586688	1.00951
SEC23IP	-1.15309	1.35562	0.311642	0.292168	-0.806337
AJUBA	-1.27729	0.798543	1.00813	0.271227	-0.800612
DDX56	-1.69698	0.708251	0.501438	-0.10882	0.596113
RHOT1	-1.69639	0.191084	0.319394	0.967471	0.218446
EMC7	-1.73216	0.0318214	0.527142	0.459039	0.714156
FBRSL1	-1.09612	1.64011	-0.155304	-0.127669	-0.261024
ATXN2	-1.41543	0.94588	0.165888	0.868852	-0.565185
CPSF4	-1.7385	0.832724	0.218198	0.334274	0.353308
ZFP30	-1.7368	0.68389	0.537555	0.0408004	0.474552
FAT1	-1.62301	0.834495	-0.292017	0.554592	0.525939
PPIF	-1.2716	1.49199	-0.214435	0.232603	-0.238559
PRR7	-1.28749	1.08296	0.65214	0.343699	-0.791305
PRR3	-1.70859	0.859381	0.467242	0.350531	0.0314394
TMEM97	-1.32045	0.993195	0.60051	0.523687	-0.796939
TRIP12	-1.28022	0.868763	-0.187182	1.1336	-0.534961
E530001K10Rik	-1.18352	0.59615	1.08024	0.44476	-0.937628
SNAP23	-1.70727	0.698544	0.750809	0.141295	0.116619
INTS8	-1.07469	0.937655	0.409958	0.801764	-1.07469
INSIG1	-1.34861	-0.268472	0.116267	1.44663	0.0541843
FAM53A	-1.56242	0.898074	0.0700604	-0.237091	0.831377
FBXL5	-1.75656	0.601318	0.632777	0.350732	0.171733
TMF1	-1.34679	1.0516	0.323428	0.6842	-0.712431
HYLS1	-1.69849	-0.0211057	0.484512	0.37543	0.85965
IWS1	-0.759231	0.883283	-0.394257	1.24222	-0.972019
URM1	-1.75237	0.587984	0.10676	0.448828	0.608797
MAN1A2	-1.34679	0.999125	0.779535	0.27751	-0.709381
CNTLN	-1.63688	0.263163	0.0423256	1.09189	0.239494
UGDH	-1.70335	-0.0265029	0.59843	0.78901	0.342412
MLEC	-1.56947	1.09662	0.142157	0.525425	-0.194737
BLM	-1.53661	1.24993	0.167197	0.203611	-0.0841245
ZNF280D	-1.70375	0.611375	0.015959	0.806407	0.270011
PHF20L1	-1.58674	-0.1723	0.342825	0.300562	1.11566
TRAP1	-1.6601	0.933436	0.590323	0.154717	-0.0183747
ARFGAP2	-1.28339	1.02604	1.00837	-0.401226	-0.349796
IDH1	1.28956	-1.08054	-0.607316	0.799698	-0.401398
Fam134a	-1.51784	0.960795	0.168242	-0.384013	0.77282
MRPL47	-1.62562	0.981751	0.441276	0.399849	-0.197252
DUSP11	-1.52713	0.543322	0.514718	0.940844	-0.471753
ZNF580	-1.58643	0.194194	0.1258	0.0729573	1.19348
ZNF444	-1.72337	0.426246	0.576906	0.717984	0.00222973
RFX7	-1.69188	0.730209	-0.0925512	0.385592	0.668636
ORMDL3	-1.61702	0.55815	0.980433	0.273079	-0.194637
KAT5	-1.74624	0.377176	0.157856	0.44757	0.763639
MFNG	1.75988	-0.474549	-0.592529	-0.554442	-0.138357
ARMCX3	-1.56342	0.555431	0.818043	0.624111	-0.434161
PRPF4	-1.55337	0.912064	0.141563	-0.302515	0.802259
EPHB2	-1.08237	1.43191	0.515356	-0.169304	-0.695596
IFT22	-1.71216	0.109289	0.353326	0.349949	0.899594
Tusc3	-1.64472	0.22308	1.09103	0.172976	0.157636
REEP4	-1.71856	0.468802	0.309776	0.0898433	0.85014
RBM15B	-1.30474	0.665913	1.28245	-0.356609	-0.287011
NT5C	-1.13791	1.52434	0.331362	-0.442955	-0.274835
Apopt1	-1.39504	0.0566187	-0.09985	0.0097879	1.42849
CYP51A1	-0.793606	0.55998	0.268557	1.20398	-1.23892
ZNF451	-1.45033	0.570783	0.0204583	1.20457	-0.345477
Casc4	-1.61215	1.07364	0.174913	0.457087	-0.0934853
TMEM218	-1.71788	0.52152	0.771973	0.425382	-0.000991142
ARID4A	-1.65009	0.38138	-0.0999755	0.988573	0.380111
AAAS	-1.63056	0.811793	0.824782	-0.034499	0.0284842
NOL11	-1.25589	1.44976	-0.445762	-0.0867863	0.338677
SREBF2	-1.52305	0.578767	-0.146422	1.14913	-0.0584228
PANK1	-1.25254	1.27671	0.539379	0.137403	-0.700951
OTUD5	-1.52936	1.13389	-0.232558	0.0649526	0.56308
TSPAN7	-1.59107	-0.369271	0.514864	0.828486	0.616987
RERE	-1.5248	0.823807	-0.245765	-0.0204515	0.967212
GRWD1	-1.57188	0.516024	0.0645993	-0.123822	1.11508
USP19	-1.68738	0.711412	-0.0718529	0.738976	0.308847
Pdcd6ip	-1.50439	1.2022	-0.0357181	0.510402	-0.172498
2810001G20Rik	-1.59387	0.520417	1.06072	0.184617	-0.17189
PMM2	-1.63708	1.08092	0.0399383	0.349593	0.166631
SMC5	-1.57348	0.619901	-0.303177	0.98773	0.269021
G3BP2	1.6735	0.129336	-0.422879	-0.52921	-0.850749
GAS1	-0.437053	1.20156	0.531674	0.140103	-1.43629
METTL5	-1.34748	0.618437	1.24772	-0.0242672	-0.494412
AUNIP	-1.55976	1.01222	-0.121048	-0.0558365	0.724424
RAB35	-1.25485	1.00036	1.03491	-0.233575	-0.546851
SOCS2	-1.21716	1.28002	0.692609	-0.137929	-0.617536
BMPR1A	-1.70512	0.649271	0.0638481	0.200281	0.791721
TFAP4	-1.53578	0.927829	0.363904	0.678039	-0.43399
RAB1B	-1.7767	0.497923	0.245204	0.492688	0.540881
EPC2	-1.69564	0.810208	0.288616	0.620097	-0.023279
AGPAT5	-1.67817	0.234932	1.01908	0.205557	0.2186
MSANTD2	-1.2986	1.21041	0.751465	-0.15295	-0.510325
POGLUT1	-1.5397	0.614711	0.242588	-0.351535	1.03394
HCFC1R1	-1.67087	0.0182967	0.470893	0.211414	0.970267
GRPEL2	-1.65173	0.804095	0.783566	-0.0357592	0.099828
MACROD2	-1.67586	0.794833	0.542424	0.491941	-0.153341
ZMYND8	-1.56957	1.08145	-0.197878	0.557995	0.128001
PBX4	-1.62249	0.599025	0.886081	-0.258493	0.395881
PFAS	-1.28052	0.74798	0.0618053	1.15357	-0.68283
SENP3	-1.71442	0.848323	0.200121	0.532105	0.133873
CDIP1	-1.58528	1.14035	0.420454	-0.0563431	0.0808178
AGO1	-0.520541	0.788471	-1.10975	-0.451298	1.29311
HAT1	1.27059	0.204112	-0.556858	-1.35687	0.439029
JTB	1.64416	-0.0458881	-0.00933033	-0.667601	-0.921338
VDAC3	0.35351	-1.47577	1.29545	-0.131014	-0.0421821
STEEP1	-1.53731	0.497472	0.696301	0.821906	-0.478369
FLNA	-1.70317	0.180202	0.0946607	0.85156	0.576744
KLF3	-1.41574	-0.301764	-0.121941	0.605122	1.23433
NUS1	-1.53113	0.740814	0.385058	0.864616	-0.459359
FAM207A	-1.60282	1.04381	0.309621	-0.202787	0.452174
DDX49	-1.6733	0.558069	0.10032	0.0811137	0.933798
PIK3R2	-1.69518	0.375487	0.120078	0.245259	0.954357
HELZ	-1.62586	0.459365	-0.264672	0.555246	0.875916
USP7	-1.35673	0.935319	-0.462069	-0.141642	1.02513
N6AMT1	-1.62909	0.576157	0.407367	-0.242804	0.888371
GNL1	-1.5953	0.269473	0.200617	-0.0328329	1.15805
ASRGL1	-1.5126	-0.489003	0.475515	0.96595	0.560135
USE1	1.14929	-0.428291	-0.739904	-0.977478	0.996381
APBB1	-1.41577	1.12768	0.334807	-0.575961	0.529244
MGA	-1.69201	0.772885	-0.108171	0.527234	0.500065
NDC1	-1.26354	1.49149	-0.112798	0.224872	-0.340029
POLR2L	-1.3733	-0.347945	0.63105	-0.162191	1.25238
SIRT6	-1.2847	1.48273	0.0339581	0.132019	-0.364006
TMEM263	-1.40083	0.121253	0.431835	1.28328	-0.435539
Tma16	-1.62133	0.858011	0.462521	0.583947	-0.283144
CBX2	-1.02811	1.43395	0.228435	0.245634	-0.879917
VEGFB	-1.39106	-0.076509	1.40454	0.236927	-0.1739
NADK	-1.73134	0.521591	0.582643	0.625238	0.00187074
RAPH1	-1.66839	0.632592	-0.170085	0.776558	0.429328
PRRX1	-0.712513	1.71158	-0.22716	-0.0593979	-0.712513
CHCHD5	-1.47924	0.10037	-0.0412059	0.0808491	1.33923
RPS6KA6	-1.55079	0.984167	-0.0282626	0.771112	-0.176228
UNC119B	-1.40047	1.13029	0.473835	0.406048	-0.609704
ARHGAP35	-1.45579	1.21857	-0.32212	0.540029	0.0193153
NUP133	-1.33432	1.38019	0.28737	0.130508	-0.463746
TAF5L	-1.46408	1.20596	0.462517	0.187044	-0.391439
XPO7	-1.39319	1.27366	-0.315184	0.565931	-0.131217
PDCD7	-1.03746	1.14538	0.940181	-0.822868	-0.225226
LZTFL1	-1.75206	0.56141	0.413873	0.654949	0.121832
CACNG4	-1.32782	1.4225	0.318107	-0.322612	-0.090174
RCBTB1	-0.657511	1.18115	0.122616	0.663967	-1.31022
MECP2	-1.73431	0.252079	0.19015	0.476127	0.815951
LRRC47	-1.27367	1.3789	0.465504	-0.0653433	-0.505392
Pak4	-1.6723	0.221554	0.00226964	0.953677	0.494799
COA6	-1.69835	0.246968	0.954109	0.147062	0.350215
IP6K1	-1.43107	0.833763	-0.190022	1.06851	-0.281182
PAFAH1B1	1.13793	-0.636903	-1.34257	0.688056	0.15349
Sys1	1.16544	-0.810072	-0.738764	-0.634821	1.01822
ATIC	-1.60911	1.15684	0.178202	0.0972222	0.17685
MTMR14	-1.76595	0.23812	0.361733	0.666626	0.499472
Actn4	-1.77216	0.628927	0.381361	0.262141	0.499734
DAG1	-1.59361	0.942993	-0.232972	0.190265	0.693324
IPO11	-1.36827	0.974022	-0.247689	0.996144	-0.354205
WIZ	-1.30733	1.32052	0.317107	0.277582	-0.607876
Xist	-1.38946	-0.532626	0.365909	0.308521	1.24765
AHCTF1	-1.37164	1.23567	0.379775	0.335137	-0.578946
LEPROT	-1.76105	0.361776	0.468006	0.705592	0.225677
USP48	-1.67075	0.873934	-0.0419892	0.63304	0.205763
SAMD4B	-1.62353	0.286537	-0.210263	0.63075	0.916508
UTP6	-1.343	1.37752	0.374421	-0.0108563	-0.398084
CWC27	-1.68502	0.808484	0.679379	-0.0156314	0.212785
EPC1	-1.65042	0.621046	0.231413	0.908141	-0.110178
HAUS1	-1.37308	-0.301148	0.358877	-0.0600009	1.37535
PPP6R3	-1.56564	1.062	0.0701536	0.618018	-0.184528
FJX1	-0.640136	0.429186	0.94535	0.69173	-1.42613
C14orf119	1.66891	-0.0691645	-0.158546	-0.450163	-0.99104
0610007P14Rik	0.537438	-1.66714	0.165572	0.0132137	0.950911
VAMP4	-1.66223	-0.220001	0.632075	0.686886	0.563266
CCDC107	-1.54232	0.333588	0.809432	0.822175	-0.42288
NGRN	-1.64259	0.355219	0.356887	-0.0894871	1.01997
XPO6	-1.51228	1.26717	0.0901831	0.286207	-0.131279
POLB	-1.75849	0.287784	0.283217	0.734475	0.453015
Rps26-ps1	-1.3394	-0.0880633	-0.0270132	-0.0276785	1.48215
SERTAD2	-1.63408	0.895049	-0.170025	0.246496	0.662563
POGK	-1.55961	0.458392	-0.429431	0.736738	0.793912
TP53BP1	-1.44838	1.32013	-0.197641	0.346378	-0.0204942
RRBP1	-1.46147	1.29416	-0.0156457	-0.202027	0.384983
DYNLT3	-1.76952	0.270245	0.609455	0.564142	0.325679
UBAP1	-1.71713	0.593082	0.727604	0.412374	-0.0159282
KTI12	-1.53275	0.863527	0.878032	0.132518	-0.34133
ZNF329	-1.47153	0.368373	-0.301092	0.144329	1.25992
FEM1B	-1.3428	1.31637	0.140404	0.410906	-0.524882
RAD50	-1.6855	0.345046	-0.0812264	0.603986	0.817697
ITGB1BP1	-1.6672	0.875799	0.531632	-0.131867	0.391641
BOP1	-1.70443	0.931997	0.385905	0.229795	0.156735
RRN3	-1.22602	0.759546	0.155737	1.11647	-0.805732
LZTS2	-1.7515	0.735573	0.491774	0.339448	0.184705
Sept3	-0.441689	0.620672	-0.664208	-0.953377	1.4386
CTDSP1	-1.48314	0.776675	0.865109	0.387624	-0.546268
KIF1A	-1.7517	0.337933	0.415021	0.769884	0.228863
SPCS3	-1.50131	1.10652	0.470723	0.34753	-0.423466
CALD1	-1.39761	1.40799	0.194015	-0.0487141	-0.155687
SLC35F1	-1.47682	0.563131	0.365948	1.05424	-0.506494
NACC1	-1.66129	0.828375	0.0708001	0.740564	0.0215504
RNF130	-1.03067	0.841905	1.06968	0.149751	-1.03067
TRPS1	-1.73892	0.765111	0.401443	0.467581	0.104783
MORN2	-1.68066	0.293245	0.247629	0.134869	1.00492
VRK1	1.77491	-0.639851	-0.293518	-0.415518	-0.426019
NIT1	-1.64653	0.778726	0.00188187	0.82515	0.0407677
USP8	-1.34936	0.787296	0.116998	1.07302	-0.627955
Bre	-1.76688	0.270138	0.302084	0.585261	0.609399
GUF1	-1.62768	0.814599	0.824171	0.0567236	-0.067809
HIP1	-1.53142	1.02516	-0.328311	0.145499	0.689072
SDHAF3	-1.40206	0.867715	0.703156	0.537134	-0.705944
LMNB2	-1.58907	0.857925	0.293612	-0.308907	0.746444
EFNB2	-1.32914	1.10029	-0.120195	0.862775	-0.513724
DCTD	-1.01052	1.62791	0.0460652	-0.100939	-0.562518
CAMK2G	-1.36782	1.06113	0.584719	0.418897	-0.696927
CCNK	-1.70178	0.789619	0.266325	0.63991	0.0059259
CDC37	1.74338	-0.068162	-0.454738	-0.657231	-0.563247
SPAG5	-0.887956	0.755453	0.114905	1.15498	-1.13738
MRPL27	1.70017	-0.377016	-0.13125	-0.249736	-0.942169
JADE1	-1.65857	0.18924	-0.0612578	0.903589	0.626995
RBM15	-1.36438	0.570368	0.69891	0.86	-0.764895
PODXL2	-1.63952	-0.224186	0.393433	0.849325	0.620947
HSPBP1	-1.65355	0.751034	-0.234576	0.5589	0.578196
CCDC61	-1.64425	0.111731	0.943754	0.626025	-0.0372636
ZNF768	-1.73783	0.807316	0.149715	0.36879	0.412013
PNPLA8	-1.47758	0.0261829	0.732572	1.07393	-0.355101
MCAT	-1.21531	1.28715	0.705827	-0.207598	-0.570074
PIM3	-1.49336	2.07026e-05	-0.0937588	0.292732	1.29437
SMAD2	-1.45397	0.681935	0.154332	1.08549	-0.467784
GORASP2	1.58297	0.378749	-0.442317	-0.739749	-0.779658
PRAF2	-1.65591	0.899565	0.617791	0.238805	-0.100251
SDCBP	0.2607	-1.35078	-0.0441543	-0.28794	1.42217
TSR2	-1.3645	1.39865	0.150861	-0.359014	0.174001
PLRG1	-1.6758	0.448813	0.294367	0.950421	-0.0178033
CCNC	-1.63389	0.433246	0.0622368	1.0646	0.0738079
B3GLCT	-1.60048	-0.177723	0.420781	1.07147	0.285956
Rnf219	-1.62763	1.04459	0.184966	0.469404	-0.0713264
SRPRB	-1.62228	0.602656	0.336393	-0.232164	0.915395
VPS41	-1.77862	0.474603	0.369518	0.605208	0.329294
SEMA5A	-1.33323	0.587262	0.29002	1.14709	-0.691147
PDXDC1	-1.43637	1.33516	0.274031	0.0927204	-0.265536
ZNRF1	-0.518081	0.741109	-0.167834	1.22792	-1.28312
NCS1	-1.57722	0.597733	0.0984115	1.05587	-0.174795
ALAD	-1.58272	0.954851	0.581794	0.372123	-0.326051
POLR1G	-1.22646	1.25942	0.652363	0.0103528	-0.695676
ERF	-1.53889	0.361663	0.941147	0.659977	-0.423896
MBOAT2	-1.5462	0.952006	-0.249422	0.044392	0.799227
Gm14698	-1.51766	-0.243069	1.05971	0.717206	-0.0161828
RFWD3	-1.6587	1.05778	0.266484	0.129251	0.205188
FAM76B	-1.69159	0.581485	-0.120499	0.735029	0.495579
DHX40	-1.70988	0.543787	-0.0758259	0.577991	0.663924
FAM120A	-1.40509	0.266827	0.0169372	1.37477	-0.253444
LIMA1	-1.35018	-0.544438	-0.0260025	1.09357	0.827055
GTF2H4	-1.55295	1.16396	0.444622	0.103177	-0.158811
NAA40	-1.30348	1.33945	0.33872	0.213839	-0.588532
USP16	-1.58075	0.961854	0.348217	0.592604	-0.321925
C6orf89	-1.58243	0.354595	0.0276582	0.0303587	1.16982
PPP2R2B	-1.37209	0.164264	0.227021	1.37297	-0.392163
2210013O21Rik	-1.39634	-0.101902	1.41899	-0.0680636	0.147312
ZMYND19	-0.940426	1.46434	0.550105	-0.322636	-0.751388
PPM1L	-1.10703	1.27465	0.296513	0.458625	-0.922762
FUT9	-1.22882	1.39463	0.0558298	0.397769	-0.619411
PICALM	-1.52691	0.494821	-0.160264	1.18233	0.0100282
RRP8	-1.7659	0.421332	0.500127	0.201533	0.642908
Dhps	-1.70282	0.934664	0.332197	0.321516	0.114438
UGP2	-1.6939	0.339597	0.846378	0.545545	-0.0376235
LIG3	-1.30672	1.4788	-0.0379039	-0.285252	0.151072
TBC1D7	-1.56744	0.591806	0.530905	0.8596	-0.414869
ABHD10	-1.65002	0.00262067	0.0509852	0.781591	0.814824
XRCC5	-1.69461	0.524218	0.609009	0.683829	-0.122451
[truncated: 3,049 more rows]
